# Supplementary material
Source: publisher figshare collection journal article supplement (https://gsajournals.figshare.com/ndownloader/files/26510939)
Supplement: Supplementary file 1 [file 26510939]

## Sheet: CBS 134246
Supplementary Table 6. Predicted secretome for the Nectriaceous fungi studied
Name Isolate	Target protein	Accession	Annotation	E-value	Score	Bias
Neonectria faginata AR 4307	Prot_3178	PF13622.1	Thioesterase-like	0.27	6	11.4
Neonectria faginata AR 4307	Prot_3378	PF01835.14	Alpha-2-macroglobulin	0.0069	11.7	0
Neonectria faginata AR 4307	Prot_863	PF03109.11	ABC1 family	0.27	6.3	0
Neonectria faginata AR 4307	Prot_3469	PF12730.2	ABC-2 family transporter	0.0074	10.5	0
Neonectria faginata AR 4307	Prot_2490	PF00561.15	Abhydrolase_1	1.3e-19	65.8	0
Neonectria faginata AR 4307	Prot_1652	PF00561.15	Abhydrolase_1	7.3e-13	43.6	3.6
Neonectria faginata AR 4307	Prot_731	PF00561.15	Abhydrolase_1	1e-12	43.1	0
Neonectria faginata AR 4307	Prot_10383	PF00561.15	Abhydrolase_1	9e-08	27	0
Neonectria faginata AR 4307	Prot_4467	PF00561.15	Abhydrolase_1	3.4e-07	25.1	0
Neonectria faginata AR 4307	Prot_4602	PF00561.15	Abhydrolase_1	4.1e-06	21.6	0
Neonectria faginata AR 4307	Prot_11566	PF00561.15	Abhydrolase_1	0.0012	13.4	0.6
Neonectria faginata AR 4307	Prot_4436	PF00561.15	Abhydrolase_1	4.9e-05	18	0
Neonectria faginata AR 4307	Prot_4577	PF00561.15	Abhydrolase_1	0.00031	15.4	0.6
Neonectria faginata AR 4307	Prot_3365	PF07859.8	Abhydrolase_3	6.5e-10	34	0.1
Neonectria faginata AR 4307	Prot_3721	PF07859.8	Abhydrolase_3	3.6e-08	28.3	0.1
Neonectria faginata AR 4307	Prot_5925	PF07859.8	Abhydrolase_3	1.2e-05	20.1	0.1
Neonectria faginata AR 4307	Prot_10383	PF07859.8	Abhydrolase_3	4.1e-06	21.6	0.4
Neonectria faginata AR 4307	Prot_4590	PF07859.8	Abhydrolase_3	2e-05	19.3	0
Neonectria faginata AR 4307	Prot_12850	PF07859.8	Abhydrolase_3	8.2e-05	17.3	0
Neonectria faginata AR 4307	Prot_1534	PF07859.8	Abhydrolase_3	0.0011	13.7	0
Neonectria faginata AR 4307	Prot_2490	PF07859.8	Abhydrolase_3	0.0033	12.1	0
Neonectria faginata AR 4307	Prot_4602	PF07859.8	Abhydrolase_3	0.0046	11.6	0.1
Neonectria faginata AR 4307	Prot_1652	PF08386.5	Abhydrolase_4	3.8e-24	79.7	0
Neonectria faginata AR 4307	Prot_11756	PF12695.2	Abhydrolase_5	1.4e-15	52.4	0
Neonectria faginata AR 4307	Prot_10383	PF12695.2	Abhydrolase_5	3.8e-14	47.7	0.1
Neonectria faginata AR 4307	Prot_2490	PF12695.2	Abhydrolase_5	9.5e-14	46.4	0
Neonectria faginata AR 4307	Prot_11566	PF12695.2	Abhydrolase_5	9.3e-12	40	0.1
Neonectria faginata AR 4307	Prot_731	PF12695.2	Abhydrolase_5	4.3e-12	41.1	0
Neonectria faginata AR 4307	Prot_8285	PF12695.2	Abhydrolase_5	1.3e-12	42.7	0
Neonectria faginata AR 4307	Prot_4436	PF12695.2	Abhydrolase_5	3.3e-11	38.2	0
Neonectria faginata AR 4307	Prot_4602	PF12695.2	Abhydrolase_5	3.6e-07	25.1	0.1
Neonectria faginata AR 4307	Prot_3318	PF12695.2	Abhydrolase_5	9.6e-06	20.5	0
Neonectria faginata AR 4307	Prot_3721	PF12695.2	Abhydrolase_5	0.00024	15.9	0
Neonectria faginata AR 4307	Prot_9701	PF12695.2	Abhydrolase_5	0.00024	16	0
Neonectria faginata AR 4307	Prot_6154	PF12695.2	Abhydrolase_5	0.0017	13.2	0
Neonectria faginata AR 4307	Prot_4577	PF12695.2	Abhydrolase_5	0.0036	12.1	2.1
Neonectria faginata AR 4307	Prot_2490	PF12697.2	Abhydrolase_6	1.6e-34	114.8	0
Neonectria faginata AR 4307	Prot_4436	PF12697.2	Abhydrolase_6	3.3e-30	100.7	0
Neonectria faginata AR 4307	Prot_731	PF12697.2	Abhydrolase_6	6.8e-30	99.7	0.2
Neonectria faginata AR 4307	Prot_11566	PF12697.2	Abhydrolase_6	1.8e-16	55.8	0.2
Neonectria faginata AR 4307	Prot_10383	PF12697.2	Abhydrolase_6	6.6e-13	44.1	1.2
Neonectria faginata AR 4307	Prot_4467	PF12697.2	Abhydrolase_6	1.5e-12	42.9	0.1
Neonectria faginata AR 4307	Prot_1652	PF12697.2	Abhydrolase_6	1.6e-07	26.5	0.7
Neonectria faginata AR 4307	Prot_11756	PF12697.2	Abhydrolase_6	3.5e-07	25.4	0
Neonectria faginata AR 4307	Prot_4602	PF12697.2	Abhydrolase_6	2.6e-05	19.3	0
Neonectria faginata AR 4307	Prot_8285	PF12697.2	Abhydrolase_6	8.9e-05	17.5	0
Neonectria faginata AR 4307	Prot_8233	PF12697.2	Abhydrolase_6	0.00017	16.6	0.5
Neonectria faginata AR 4307	Prot_3318	PF12697.2	Abhydrolase_6	0.0026	12.7	0
Neonectria faginata AR 4307	Prot_9701	PF12697.2	Abhydrolase_6	0.0011	13.9	0
Neonectria faginata AR 4307	Prot_4577	PF12697.2	Abhydrolase_6	0.00075	14.5	0.1
Neonectria faginata AR 4307	Prot_11978	PF08882.6	Acetone-carb-G	0.0046	12.1	0
Neonectria faginata AR 4307	Prot_7204	PF00694.14	Aconitase_C	0.00072	14.7	0.1
Neonectria faginata AR 4307	Prot_3239	PF12806.2	Acyl-CoA_dh_C	0.016	10.1	0.3
Neonectria faginata AR 4307	Prot_6886	PF02439.10	Adeno_E3_CR2	0.0048	11.5	0
Neonectria faginata AR 4307	Prot_595	PF03678.9	Adeno_hexon_C	0.0017	12.9	0.1
Neonectria faginata AR 4307	Prot_9791	PF00578.16	AhpC-TSA	9.9e-06	20.3	0
Neonectria faginata AR 4307	Prot_3135	PF01262.16	AlaDh_PNT_C	0.00055	14.6	0.3
Neonectria faginata AR 4307	Prot_1509	PF01263.15	Aldose_epim	2.7e-50	166.2	0.1
Neonectria faginata AR 4307	Prot_9157	PF00248.16	Aldo_ket_red	4.8e-12	40.3	0
Neonectria faginata AR 4307	Prot_3245	PF05426.7	Alginate_lyase	1.5e-13	45.8	6.1
Neonectria faginata AR 4307	Prot_7333	PF05426.7	Alginate_lyase	8.4e-13	43.3	4.4
Neonectria faginata AR 4307	Prot_1217	PF00128.19	Alpha_amylase	5.6e-64	211.5	2.3
Neonectria faginata AR 4307	Prot_7204	PF00128.19	Alpha_amylase	9.1e-62	204.3	0.2
Neonectria faginata AR 4307	Prot_4064	PF06964.7	Alpha-L-AF_C	7.5e-29	95.8	0
Neonectria faginata AR 4307	Prot_844	PF03229.8	Alpha_GJ	0.22	7	15.3
Neonectria faginata AR 4307	Prot_3355	PF01425.16	Amidase	2.5e-31	104	2.8
Neonectria faginata AR 4307	Prot_1085	PF01425.16	Amidase	1.1e-29	98.6	0.1
Neonectria faginata AR 4307	Prot_9445	PF01425.16	Amidase	6.3e-22	73	0.1
Neonectria faginata AR 4307	Prot_790	PF01425.16	Amidase	2.9e-18	61	1.5
Neonectria faginata AR 4307	Prot_5618	PF01979.15	Amidohydro_1	1.4e-12	43	0
Neonectria faginata AR 4307	Prot_5727	PF01979.15	Amidohydro_1	0.0074	11	0.4
Neonectria faginata AR 4307	Prot_3259	PF04909.9	Amidohydro_2	1.4e-26	88.7	0.2
Neonectria faginata AR 4307	Prot_5727	PF07969.6	Amidohydro_3	2.8e-61	202.9	5.7
Neonectria faginata AR 4307	Prot_1025	PF07969.6	Amidohydro_3	4.7e-13	44.1	0
Neonectria faginata AR 4307	Prot_5618	PF07969.6	Amidohydro_3	0.00096	13.5	0
Neonectria faginata AR 4307	Prot_5618	PF13147.1	Amidohydro_1	0.00037	15.6	0
Neonectria faginata AR 4307	Prot_1025	PF13147.1	Amidohydro_1	0.0028	12.8	0.1
Neonectria faginata AR 4307	Prot_5618	PF13594.1	Urease_alpha	4e-15	50.5	0
Neonectria faginata AR 4307	Prot_1025	PF13594.1	Urease_alpha	4.5e-10	34.3	0
Neonectria faginata AR 4307	Prot_5727	PF13594.1	Urease_alpha	6.6e-05	17.8	0
Neonectria faginata AR 4307	Prot_256	PF01593.19	Amino_oxidase	7.7e-28	92.7	0.2
Neonectria faginata AR 4307	Prot_7648	PF01593.19	Amino_oxidase	1.7e-08	29	0
Neonectria faginata AR 4307	Prot_11406	PF01593.19	Amino_oxidase	2.5e-06	21.8	0.1
Neonectria faginata AR 4307	Prot_3135	PF01593.19	Amino_oxidase	2.2e-06	22	0
Neonectria faginata AR 4307	Prot_8890	PF14828.1	Amnionless	2.4e-05	18	0
Neonectria faginata AR 4307	Prot_11160	PF00501.23	AMP-binding	5.4e-76	250.6	0
Neonectria faginata AR 4307	Prot_11160	PF13193.1	AMP-binding_C	5.2e-12	41.7	0
Neonectria faginata AR 4307	Prot_8927	PF15243.1	ANAPC15	0.026	9.7	10.6
Neonectria faginata AR 4307	Prot_9341	PF02558.11	ApbA	0.0015	13	0.2
Neonectria faginata AR 4307	Prot_10477	PF02558.11	ApbA	0.0046	11.5	0.1
Neonectria faginata AR 4307	Prot_7648	PF02558.11	ApbA	0.0057	11.2	0.1
Neonectria faginata AR 4307	Prot_7622	PF05918.6	API5	5.8	0.3	9.6
Neonectria faginata AR 4307	Prot_6886	PF10351.4	Apt1	0.16	5.8	6
Neonectria faginata AR 4307	Prot_3585	PF00491.16	Arginase	2.7e-90	297.4	0
Neonectria faginata AR 4307	Prot_4535	PF01731.15	Arylesterase	2e-08	29.2	0.2
Neonectria faginata AR 4307	Prot_3954	PF05935.6	Arylsulfotrans	4.2e-22	73.3	0.9
Neonectria faginata AR 4307	Prot_11773	PF05935.6	Arylsulfotrans	5.2e-13	43.3	0
Neonectria faginata AR 4307	Prot_11773	PF14269.1	Arylsulfotran_2	4.7e-61	201.6	0
Neonectria faginata AR 4307	Prot_3954	PF14269.1	Arylsulfotran_2	8.2e-59	194.2	2.1
Neonectria faginata AR 4307	Prot_7225	PF15323.1	Ashwin	0.35	5.9	14.2
Neonectria faginata AR 4307	Prot_1017	PF15323.1	Ashwin	1.6	3.7	9.2
Neonectria faginata AR 4307	Prot_1396	PF00026.18	Asp	1e-65	217.1	5.4
Neonectria faginata AR 4307	Prot_10962	PF00026.18	Asp	8.1e-64	210.9	10.4
Neonectria faginata AR 4307	Prot_3355	PF00026.18	Asp	5.3e-50	165.5	0
Neonectria faginata AR 4307	Prot_603	PF00026.18	Asp	2.8e-34	113.8	0.3
Neonectria faginata AR 4307	Prot_8062	PF00026.18	Asp	3.5e-05	18.2	0
Neonectria faginata AR 4307	Prot_10962	PF13650.1	Asp_protease_2	9.1e-06	21.2	0.1
Neonectria faginata AR 4307	Prot_1396	PF13650.1	Asp_protease_2	0.0037	12.9	0
Neonectria faginata AR 4307	Prot_603	PF13650.1	Asp_protease_2	0.76	5.4	0.1
Neonectria faginata AR 4307	Prot_3413	PF01400.19	Astacin	0.00053	14.5	0.3
Neonectria faginata AR 4307	Prot_5890	PF09451.5	ATG27	2.1e-43	143.5	1.2
Neonectria faginata AR 4307	Prot_2892	PF02038.11	ATP1_PLM_MAT8	0.098	6.8	4.5
Neonectria faginata AR 4307	Prot_6264	PF03154.10	Atrophin-1	1.9	1.5	18
Neonectria faginata AR 4307	Prot_2995	PF03154.10	Atrophin-1	13	-1.2	19.5
Neonectria faginata AR 4307	Prot_3469	PF11725.3	AvrE_T3Es	3.1	-0.3	27.4
Neonectria faginata AR 4307	Prot_11566	PF05448.7	AXE1	0.0061	10.1	0
Neonectria faginata AR 4307	Prot_36	PF02310.14	B12-binding	0.0015	13.4	0.1
Neonectria faginata AR 4307	Prot_11566	PF08840.6	BAAT_C	2.5e-06	22.4	0
Neonectria faginata AR 4307	Prot_4602	PF08840.6	BAAT_C	0.00088	14.1	0
Neonectria faginata AR 4307	Prot_12183	PF05968.6	Bacillus_PapR	0.0019	13.4	0.1
Neonectria faginata AR 4307	Prot_5432	PF04513.7	Baculo_PEP_C	0.00095	14.1	9.3
Neonectria faginata AR 4307	Prot_9587	PF04513.7	Baculo_PEP_C	0.0017	13.3	0
Neonectria faginata AR 4307	Prot_9217	PF04684.8	BAF1_ABF1	0.071	6.9	7.9
Neonectria faginata AR 4307	Prot_642	PF00967.12	Barwin	2e-05	19.3	0.4
Neonectria faginata AR 4307	Prot_567	PF08031.7	BBE	1.8e-16	54.9	0
Neonectria faginata AR 4307	Prot_6015	PF08031.7	BBE	6.4e-16	53.1	0.1
Neonectria faginata AR 4307	Prot_1313	PF08031.7	BBE	5e-13	43.9	0
Neonectria faginata AR 4307	Prot_4042	PF08031.7	BBE	1.4e-12	42.4	0.9
Neonectria faginata AR 4307	Prot_8520	PF08031.7	BBE	1.1e-09	33.1	0.1
Neonectria faginata AR 4307	Prot_10872	PF08031.7	BBE	3.9e-08	28.2	0
Neonectria faginata AR 4307	Prot_7816	PF08031.7	BBE	9.5e-06	20.6	0.1
Neonectria faginata AR 4307	Prot_11537	PF08031.7	BBE	0.019	10	0.1
Neonectria faginata AR 4307	Prot_8136	PF14782.1	BBS2_C	0.088	6.3	0
Neonectria faginata AR 4307	Prot_12252	PF00144.19	Beta-lactamase	8.3e-37	121.9	0.3
Neonectria faginata AR 4307	Prot_3831	PF00144.19	Beta-lactamase	1e-36	121.6	0.2
Neonectria faginata AR 4307	Prot_9481	PF13364.1	BetaGal_dom4_5	0.00022	16.6	0
Neonectria faginata AR 4307	Prot_4510	PF13229.1	Beta_helix	5.4e-14	47.3	9.2
Neonectria faginata AR 4307	Prot_10888	PF13229.1	Beta_helix	1.2e-10	36.5	2.2
Neonectria faginata AR 4307	Prot_3149	PF13229.1	Beta_helix	6.8e-08	27.5	14.7
Neonectria faginata AR 4307	Prot_551	PF13229.1	Beta_helix	1.7e-08	29.4	15.4
Neonectria faginata AR 4307	Prot_6123	PF13229.1	Beta_helix	1.2e-07	26.7	9.7
Neonectria faginata AR 4307	Prot_8978	PF13229.1	Beta_helix	8.2e-06	20.7	9.2
Neonectria faginata AR 4307	Prot_9551	PF13229.1	Beta_helix	0.00049	15	33.4
Neonectria faginata AR 4307	Prot_2927	PF13229.1	Beta_helix	0.00025	15.9	9.4
Neonectria faginata AR 4307	Prot_5097	PF13229.1	Beta_helix	0.0073	11.1	2.9
Neonectria faginata AR 4307	Prot_5809	PF07523.7	Big_3	0.094	7.9	0.7
Neonectria faginata AR 4307	Prot_2326	PF13205.1	Big_5	0.00086	15	0
Neonectria faginata AR 4307	Prot_4684	PF02012.15	BNR	0.0035	12.3	0.2
Neonectria faginata AR 4307	Prot_8195	PF02012.15	BNR	0.0029	12.6	0.3
Neonectria faginata AR 4307	Prot_642	PF02012.15	BNR	0.0057	11.7	1.2
Neonectria faginata AR 4307	Prot_4684	PF13088.1	BNR_2	1.6e-05	19.3	0
Neonectria faginata AR 4307	Prot_8195	PF13088.1	BNR_2	3.2e-06	21.6	0
Neonectria faginata AR 4307	Prot_792	PF04076.8	BOF	0.0017	13.3	0.1
Neonectria faginata AR 4307	Prot_8927	PF09073.5	BUD22	0.25	5.4	9.7
Neonectria faginata AR 4307	Prot_4297	PF09073.5	BUD22	0.73	3.8	31.6
Neonectria faginata AR 4307	Prot_678	PF09073.5	BUD22	8.4	0.3	14.4
Neonectria faginata AR 4307	Prot_6279	PF09073.5	BUD22	8.6	0.3	15.8
Neonectria faginata AR 4307	Prot_973	PF09792.4	But2	1.5e-05	19.8	0.1
Neonectria faginata AR 4307	Prot_6348	PF07654.10	C1-set	0.006	11.7	0.1
Neonectria faginata AR 4307	Prot_7557	PF00386.16	C1q	0.75	4.9	0
Neonectria faginata AR 4307	Prot_74	PF06662.8	C5-epim_C	0.0026	12.1	0.1
Neonectria faginata AR 4307	Prot_9587	PF09053.5	CagZ	0.00098	13.5	0.1
Neonectria faginata AR 4307	Prot_7017	PF00188.21	CAP	8.5e-19	63.3	0.7
Neonectria faginata AR 4307	Prot_5320	PF00188.21	CAP	7.7e-11	37.6	0.1
Neonectria faginata AR 4307	Prot_5320	PF01213.14	CAP_N	0.00041	14.8	6.3
Neonectria faginata AR 4307	Prot_7876	PF13620.1	CarboxypepD_reg	0.00057	15	0
Neonectria faginata AR 4307	Prot_1219	PF13620.1	CarboxypepD_reg	0.00021	16.4	1.3
Neonectria faginata AR 4307	Prot_2494	PF13620.1	CarboxypepD_reg	0.02	10.1	2.7
Neonectria faginata AR 4307	Prot_7075	PF00199.14	Catalase	1.2e-159	526.2	0.7
Neonectria faginata AR 4307	Prot_7075	PF06628.7	Catalase-rel	1.3e-21	71.4	0.1
Neonectria faginata AR 4307	Prot_12133	PF02275.13	CBAH	9.5e-21	69.5	0
Neonectria faginata AR 4307	Prot_2494	PF14683.1	CBM-like	6.6e-58	190.1	0
Neonectria faginata AR 4307	Prot_1219	PF14683.1	CBM-like	3.4e-37	122.7	0.7
Neonectria faginata AR 4307	Prot_7876	PF14683.1	CBM-like	8.6e-13	43.3	0
Neonectria faginata AR 4307	Prot_6072	PF00734.13	CBM_1	2.2e-14	48	13.5
Neonectria faginata AR 4307	Prot_6758	PF00734.13	CBM_1	2.2e-13	44.7	7.5
Neonectria faginata AR 4307	Prot_8978	PF00734.13	CBM_1	4.3e-13	43.8	10.9
Neonectria faginata AR 4307	Prot_4602	PF00734.13	CBM_1	3.4e-12	40.9	9.8
Neonectria faginata AR 4307	Prot_10483	PF00734.13	CBM_1	7.7e-13	43	13.5
Neonectria faginata AR 4307	Prot_5695	PF00734.13	CBM_1	1.1e-11	39.3	7.2
Neonectria faginata AR 4307	Prot_2641	PF00734.13	CBM_1	2.1	3.2	4.8
Neonectria faginata AR 4307	Prot_752	PF02018.12	CBM_4_9	0.002	13.2	0.7
Neonectria faginata AR 4307	Prot_12090	PF02018.12	CBM_4_9	0.0019	13.3	0.1
Neonectria faginata AR 4307	Prot_1740	PF02018.12	CBM_4_9	0.0011	14	0.7
Neonectria faginata AR 4307	Prot_4064	PF02018.12	CBM_4_9	0.011	10.9	0.8
Neonectria faginata AR 4307	Prot_2721	PF04995.9	CcmD	1.7e-05	19.6	0.7
Neonectria faginata AR 4307	Prot_8890	PF04995.9	CcmD	0.12	7.3	0.2
Neonectria faginata AR 4307	Prot_8452	PF14984.1	CD24	0.0074	11.2	7
Neonectria faginata AR 4307	Prot_8927	PF02724.9	CDC45	0.012	8.7	5.7
Neonectria faginata AR 4307	Prot_5890	PF02724.9	CDC45	0.11	5.5	8.4
Neonectria faginata AR 4307	Prot_6264	PF02724.9	CDC45	0.56	3.2	13.4
Neonectria faginata AR 4307	Prot_678	PF02724.9	CDC45	1.8	1.5	10
Neonectria faginata AR 4307	Prot_421	PF00150.13	Cellulase	5.8e-56	184.8	1.2
Neonectria faginata AR 4307	Prot_10483	PF00150.13	Cellulase	1.6e-54	180	4
Neonectria faginata AR 4307	Prot_9561	PF00150.13	Cellulase	1.9e-21	71.5	5.2
Neonectria faginata AR 4307	Prot_3057	PF00150.13	Cellulase	1.9e-21	71.5	3.2
Neonectria faginata AR 4307	Prot_9939	PF00150.13	Cellulase	0.00012	16.4	0.4
Neonectria faginata AR 4307	Prot_6551	PF00150.13	Cellulase	0.00026	15.3	0.9
Neonectria faginata AR 4307	Prot_3057	PF12876.2	Cellulase-like	6.9e-08	28	0
Neonectria faginata AR 4307	Prot_8927	PF09026.5	CENP-B_dimeris	0.4	6	14.7
Neonectria faginata AR 4307	Prot_12289	PF15511.1	CENp-T_C	1	3.5	17.9
Neonectria faginata AR 4307	Prot_1528	PF07249.7	Cerato-platanin	7.8e-56	182.3	0.3
Neonectria faginata AR 4307	Prot_32	PF07249.7	Cerato-platanin	4.9e-55	179.7	0.7
Neonectria faginata AR 4307	Prot_6457	PF07249.7	Cerato-platanin	3e-05	19.1	0.1
Neonectria faginata AR 4307	Prot_36	PF05730.6	CFEM	2e-12	41.9	10.3
Neonectria faginata AR 4307	Prot_5301	PF05730.6	CFEM	7.7e-12	40	13.3
Neonectria faginata AR 4307	Prot_6661	PF05730.6	CFEM	8.5e-08	27	14.9
Neonectria faginata AR 4307	Prot_2721	PF05730.6	CFEM	9.4e-07	23.7	8.8
Neonectria faginata AR 4307	Prot_4342	PF05730.6	CFEM	1.2e-05	20.2	3.5
Neonectria faginata AR 4307	Prot_4654	PF05730.6	CFEM	0.039	8.9	12.2
Neonectria faginata AR 4307	Prot_3414	PF00187.14	Chitin_bind_1	2.7e-08	28.8	8.2
Neonectria faginata AR 4307	Prot_12079	PF00187.14	Chitin_bind_1	2.8e-06	22.3	23.4
Neonectria faginata AR 4307	Prot_7418	PF00187.14	Chitin_bind_1	4.2e-06	21.8	17.8
Neonectria faginata AR 4307	Prot_7506	PF00187.14	Chitin_bind_1	0.025	9.7	14.5
Neonectria faginata AR 4307	Prot_4297	PF00187.14	Chitin_bind_1	0.05	8.7	11.2
Neonectria faginata AR 4307	Prot_678	PF03067.10	LPMO_10	2.2e-14	49.2	0.3
Neonectria faginata AR 4307	Prot_2490	PF12740.2	Chlorophyllase2	0.00065	13.7	0
Neonectria faginata AR 4307	Prot_11756	PF12740.2	Chlorophyllase2	0.0022	11.9	0
Neonectria faginata AR 4307	Prot_10888	PF14592.1	Chondroitinas_B	3.2e-06	21.2	0
Neonectria faginata AR 4307	Prot_3149	PF14592.1	Chondroitinas_B	2.1e-05	18.5	0
Neonectria faginata AR 4307	Prot_4697	PF08547.7	CIA30	0.011	10.6	0
Neonectria faginata AR 4307	Prot_5890	PF00878.13	CIMR	0.00039	15.3	0
Neonectria faginata AR 4307	Prot_2892	PF13903.1	Claudin_2	0.02	9.6	0.1
Neonectria faginata AR 4307	Prot_2892	PF12467.3	CMV_1a	0.76	5.2	0.8
Neonectria faginata AR 4307	Prot_5393	PF06213.7	CobT	0.11	6.6	16
Neonectria faginata AR 4307	Prot_4590	PF00135.23	Coesterase	1.6e-101	335.7	0
Neonectria faginata AR 4307	Prot_5925	PF00135.23	Coesterase	8e-93	306.9	0
Neonectria faginata AR 4307	Prot_1534	PF00135.23	Coesterase	1e-91	303.3	0
Neonectria faginata AR 4307	Prot_3365	PF00135.23	Coesterase	3.9e-89	294.8	0
Neonectria faginata AR 4307	Prot_12850	PF00135.23	Coesterase	8.5e-80	263.9	2.1
Neonectria faginata AR 4307	Prot_3721	PF00135.23	Coesterase	1.1e-62	207.5	0.1
Neonectria faginata AR 4307	Prot_4602	PF00135.23	Coesterase	0.00065	13.5	0
Neonectria faginata AR 4307	Prot_9345	PF07143.6	CrtC	1.9e-05	19.1	1.3
Neonectria faginata AR 4307	Prot_7353	PF00030.14	Crystall	3.8e-07	25	0
Neonectria faginata AR 4307	Prot_7353	PF08964.5	Crystall_3	8.8e-06	20.5	0
Neonectria faginata AR 4307	Prot_6886	PF04145.10	Ctr	0.093	7.8	0
Neonectria faginata AR 4307	Prot_7557	PF00394.17	Cu-oxidase	7.7e-36	118.5	0.2
Neonectria faginata AR 4307	Prot_6173	PF00394.17	Cu-oxidase	1.3e-33	111.2	0
Neonectria faginata AR 4307	Prot_7503	PF00394.17	Cu-oxidase	9.1e-33	108.5	0.1
Neonectria faginata AR 4307	Prot_9160	PF00394.17	Cu-oxidase	7.3e-29	95.8	0
Neonectria faginata AR 4307	Prot_6741	PF00394.17	Cu-oxidase	1.8e-12	42.5	0.1
Neonectria faginata AR 4307	Prot_6173	PF07731.9	Cu-oxidase_2	9e-42	136.9	0
Neonectria faginata AR 4307	Prot_9160	PF07731.9	Cu-oxidase_2	1.8e-37	123	0
Neonectria faginata AR 4307	Prot_7557	PF07731.9	Cu-oxidase_2	1.7e-37	123.1	0.5
Neonectria faginata AR 4307	Prot_7503	PF07731.9	Cu-oxidase_2	4.8e-38	124.9	0.8
Neonectria faginata AR 4307	Prot_6741	PF07731.9	Cu-oxidase_2	2e-26	87.2	1.9
Neonectria faginata AR 4307	Prot_1067	PF07731.9	Cu-oxidase_2	0.0045	11.6	0.3
Neonectria faginata AR 4307	Prot_9160	PF07732.10	Cu-oxidase_3	3.2e-42	138.1	1.7
Neonectria faginata AR 4307	Prot_7557	PF07732.10	Cu-oxidase_3	2.4e-43	141.7	0.9
Neonectria faginata AR 4307	Prot_6741	PF07732.10	Cu-oxidase_3	2.3e-44	145	1.1
Neonectria faginata AR 4307	Prot_7503	PF07732.10	Cu-oxidase_3	1.3e-39	129.7	1.2
Neonectria faginata AR 4307	Prot_6173	PF07732.10	Cu-oxidase_3	6.8e-23	75.7	2
Neonectria faginata AR 4307	Prot_11302	PF08007.7	Cupin_4	4.9e-05	17.7	0
Neonectria faginata AR 4307	Prot_11302	PF13621.1	Cupin_8	6.1e-64	210.9	0.1
Neonectria faginata AR 4307	Prot_7169	PF13473.1	Cupredoxin1	0.0011	13.9	0
Neonectria faginata AR 4307	Prot_1067	PF13473.1	Cupredoxin1	0.0024	12.9	0
Neonectria faginata AR 4307	Prot_4577	PF01083.17	Cutinase	9.2e-53	173.7	10.9
Neonectria faginata AR 4307	Prot_9701	PF01083.17	Cutinase	3.8e-43	142.3	0.1
Neonectria faginata AR 4307	Prot_844	PF01083.17	Cutinase	2.2e-41	136.6	0
Neonectria faginata AR 4307	Prot_10383	PF01083.17	Cutinase	0.0063	11.3	0
Neonectria faginata AR 4307	Prot_1067	PF02298.12	Cu_bind_like	0.0001	17.1	0.4
Neonectria faginata AR 4307	Prot_8453	PF02298.12	Cu_bind_like	9.3e-05	17.3	0.3
Neonectria faginata AR 4307	Prot_7622	PF02298.12	Cu_bind_like	0.02	9.8	0.9
Neonectria faginata AR 4307	Prot_4237	PF08881.5	CVNH	3.1e-10	35.3	0
Neonectria faginata AR 4307	Prot_7380	PF08881.5	CVNH	1.5e-08	29.9	0
Neonectria faginata AR 4307	Prot_7172	PF08881.5	CVNH	0.0001	17.6	0.1
Neonectria faginata AR 4307	Prot_454	PF08881.5	CVNH	1.2e-05	20.5	0
Neonectria faginata AR 4307	Prot_7169	PF04889.7	Cwf_Cwc_15	0.04	8.6	3.5
Neonectria faginata AR 4307	Prot_4023	PF04889.7	Cwf_Cwc_15	0.46	5.2	8
Neonectria faginata AR 4307	Prot_8309	PF00173.23	Cyt-b5	0.07	8.1	0.1
Neonectria faginata AR 4307	Prot_4042	PF09265.5	Cytokin-bind	5.4e-05	17.5	0
Neonectria faginata AR 4307	Prot_6015	PF09265.5	Cytokin-bind	0.003	11.8	0
Neonectria faginata AR 4307	Prot_11406	PF01266.19	DAO	6.5e-08	26.9	0.1
Neonectria faginata AR 4307	Prot_595	PF01266.19	DAO	1.3e-06	22.6	0.1
Neonectria faginata AR 4307	Prot_3135	PF01266.19	DAO	1.3e-07	25.9	2.1
Neonectria faginata AR 4307	Prot_10860	PF01266.19	DAO	1.8e-06	22.1	0
Neonectria faginata AR 4307	Prot_7648	PF01266.19	DAO	8e-07	23.3	0
Neonectria faginata AR 4307	Prot_11166	PF01266.19	DAO	5.8e-05	17.2	0.2
Neonectria faginata AR 4307	Prot_9341	PF01266.19	DAO	0.0096	9.9	0
Neonectria faginata AR 4307	Prot_6125	PF01266.19	DAO	0.0049	10.8	0
Neonectria faginata AR 4307	Prot_10477	PF01266.19	DAO	0.012	9.5	0.1
Neonectria faginata AR 4307	Prot_12439	PF07213.6	DAP10	0.29	6	0.1
Neonectria faginata AR 4307	Prot_678	PF03344.10	Daxx	0.053	7	14
Neonectria faginata AR 4307	Prot_5464	PF03344.10	Daxx	0.087	6.3	15.9
Neonectria faginata AR 4307	Prot_8927	PF03344.10	Daxx	0.18	5.2	9.7
Neonectria faginata AR 4307	Prot_12289	PF03344.10	Daxx	1.3	2.4	22
Neonectria faginata AR 4307	Prot_1682	PF03345.9	DDOST_48kD	5.4e-158	520.9	0
Neonectria faginata AR 4307	Prot_6196	PF08841.5	DDR	0.0018	12.2	0.2
Neonectria faginata AR 4307	Prot_11285	PF00610.16	DEP	9.7e-13	42.8	0
Neonectria faginata AR 4307	Prot_6886	PF14286.1	DHHW	0.033	8.5	4.6
Neonectria faginata AR 4307	Prot_2721	PF05086.7	Dicty_REP	0.37	3.5	6.5
Neonectria faginata AR 4307	Prot_4936	PF05086.7	Dicty_REP	3.2	0.3	9.8
Neonectria faginata AR 4307	Prot_5365	PF05086.7	Dicty_REP	9.2	-1.2	16.6
Neonectria faginata AR 4307	Prot_11566	PF01738.13	DLH	1.1e-06	23.1	0
Neonectria faginata AR 4307	Prot_8927	PF04931.8	DNA_pol_phil	1.6	1.4	14
Neonectria faginata AR 4307	Prot_5393	PF00242.12	DNA_pol_viral_N	0.08	7	9
Neonectria faginata AR 4307	Prot_5365	PF00242.12	DNA_pol_viral_N	0.16	6	9.7
Neonectria faginata AR 4307	Prot_4297	PF00242.12	DNA_pol_viral_N	0.95	3.4	11.1
Neonectria faginata AR 4307	Prot_4342	PF00242.12	DNA_pol_viral_N	1.1	3.2	8.6
Neonectria faginata AR 4307	Prot_6886	PF00242.12	DNA_pol_viral_N	1.8	2.5	11
Neonectria faginata AR 4307	Prot_6264	PF00242.12	DNA_pol_viral_N	6.3	0.7	16.8
Neonectria faginata AR 4307	Prot_2275	PF00242.12	DNA_pol_viral_N	14	-0.4	14.1
Neonectria faginata AR 4307	Prot_642	PF03330.13	DPBB_1	3.5e-09	31.7	0.2
Neonectria faginata AR 4307	Prot_3318	PF00930.16	DPPIV_N	7.7e-108	355.2	1.2
Neonectria faginata AR 4307	Prot_8320	PF00930.16	DPPIV_N	0.0031	11.1	0.2
Neonectria faginata AR 4307	Prot_113	PF12393.3	Dr_adhesin	1.2	4.5	4.3
Neonectria faginata AR 4307	Prot_9791	PF01323.15	DSBA	0.14	6.8	0
Neonectria faginata AR 4307	Prot_1024	PF06280.7	fn3_5	4.9e-12	41.3	0
Neonectria faginata AR 4307	Prot_3716	PF06305.6	LapA_dom	0.01	10.4	0.2
Neonectria faginata AR 4307	Prot_10929	PF06305.6	LapA_dom	0.0057	11.2	0.2
Neonectria faginata AR 4307	Prot_2490	PF06342.7	DUF1057	0.0024	11.7	0
Neonectria faginata AR 4307	Prot_4436	PF06342.7	DUF1057	0.0054	10.6	0
Neonectria faginata AR 4307	Prot_592	PF06439.6	DUF1080	0.00028	15.9	0
Neonectria faginata AR 4307	Prot_2721	PF06697.7	DUF1191	0.00058	13.8	0
Neonectria faginata AR 4307	Prot_10929	PF06697.7	DUF1191	0.001	13	0
Neonectria faginata AR 4307	Prot_12439	PF06697.7	DUF1191	0.0028	11.5	0
Neonectria faginata AR 4307	Prot_4234	PF06697.7	DUF1191	0.0043	10.9	0
Neonectria faginata AR 4307	Prot_4654	PF06724.6	DUF1206	0.0012	13.7	0.4
Neonectria faginata AR 4307	Prot_7546	PF06842.7	DUF1242	3.8e-15	50.2	0
Neonectria faginata AR 4307	Prot_7379	PF07013.6	DUF1314	0.021	9.3	0.2
Neonectria faginata AR 4307	Prot_5019	PF07210.7	DUF1416	0.006	11.3	0
Neonectria faginata AR 4307	Prot_4555	PF07374.6	DUF1492	3.4	3	0.1
Neonectria faginata AR 4307	Prot_6886	PF07423.6	DUF1510	0.11	6.8	8.6
Neonectria faginata AR 4307	Prot_678	PF07423.6	DUF1510	0.21	6	11.1
Neonectria faginata AR 4307	Prot_6264	PF07423.6	DUF1510	1.1	3.6	27.2
Neonectria faginata AR 4307	Prot_8890	PF07466.6	DUF1517	0.0012	12.9	1.1
Neonectria faginata AR 4307	Prot_7699	PF07510.6	DUF1524	3.9e-15	51	0
Neonectria faginata AR 4307	Prot_1661	PF07774.8	EMC1_C	8.3e-66	216.4	0
Neonectria faginata AR 4307	Prot_11538	PF07789.7	DUF1627	0.016	9.8	0
Neonectria faginata AR 4307	Prot_5301	PF07897.6	EAR	0.26	6.1	9.7
Neonectria faginata AR 4307	Prot_4297	PF07897.6	EAR	0.97	4.3	19.5
Neonectria faginata AR 4307	Prot_3264	PF07944.7	Glyco_hydro_127	1.2e-99	329	0
Neonectria faginata AR 4307	Prot_74	PF07944.7	Glyco_hydro_127	0.00069	13	0
Neonectria faginata AR 4307	Prot_592	PF09224.6	DUF1961	1.3e-81	267.9	0
Neonectria faginata AR 4307	Prot_1217	PF09260.6	DUF1966	7.3e-28	91.6	0.7
Neonectria faginata AR 4307	Prot_7204	PF09260.6	DUF1966	1.7e-05	20	0.1
Neonectria faginata AR 4307	Prot_1552	PF09594.5	GT87	0.0024	12.4	0.4
Neonectria faginata AR 4307	Prot_4199	PF09594.5	GT87	0.022	9.3	4.2
Neonectria faginata AR 4307	Prot_5432	PF09858.4	DUF2085	0.11	7.7	0.4
Neonectria faginata AR 4307	Prot_11456	PF09884.4	DUF2111	0.0053	11.7	0.7
Neonectria faginata AR 4307	Prot_5365	PF10220.4	Smg8_Smg9	2.8	0.8	11.1
Neonectria faginata AR 4307	Prot_8496	PF09949.4	DUF2183	1.1e-18	62.1	0.1
Neonectria faginata AR 4307	Prot_5393	PF13203.1	DUF2201_N	0.017	9.3	7.6
Neonectria faginata AR 4307	Prot_5890	PF13203.1	DUF2201_N	0.1	6.7	5
Neonectria faginata AR 4307	Prot_12609	PF10265.4	Miga	0.84	3.3	10.2
Neonectria faginata AR 4307	Prot_11216	PF10080.4	DUF2318	0.11	7.4	1
Neonectria faginata AR 4307	Prot_6264	PF10310.4	DUF5427	0.00031	14.7	22.8
Neonectria faginata AR 4307	Prot_678	PF10446.4	DUF2457	0.00012	16	14.7
Neonectria faginata AR 4307	Prot_8927	PF10446.4	DUF2457	0.26	4.9	14.7
Neonectria faginata AR 4307	Prot_6264	PF10446.4	DUF2457	0.45	4.2	21.9
Neonectria faginata AR 4307	Prot_5890	PF10446.4	DUF2457	1.3	2.6	22
Neonectria faginata AR 4307	Prot_2721	PF10667.4	DUF2486	0.001	14.7	20.6
Neonectria faginata AR 4307	Prot_8890	PF10873.3	CYYR1	0.0042	12.3	0
Neonectria faginata AR 4307	Prot_10868	PF10894.3	DUF2689	0.0022	12.9	0
Neonectria faginata AR 4307	Prot_113	PF10916.3	DUF2712	0.00056	15	2.3
Neonectria faginata AR 4307	Prot_4093	PF10923.3	DUF2791	0.0058	10.3	0
Neonectria faginata AR 4307	Prot_5727	PF10977.3	DUF2797	0.00026	15.7	0.5
Neonectria faginata AR 4307	Prot_8233	PF11144.3	DUF2920	0.0053	10.8	0
Neonectria faginata AR 4307	Prot_9217	PF11162.3	DUF2946	0.002	13.4	5.5
Neonectria faginata AR 4307	Prot_9273	PF11200.3	DUF2981	3	1.8	15.4
Neonectria faginata AR 4307	Prot_4436	PF11288.3	DUF3089	0.00082	13.6	0
Neonectria faginata AR 4307	Prot_5639	PF11327.3	Egh16-like	8.7e-60	196.7	4.7
Neonectria faginata AR 4307	Prot_6825	PF11327.3	Egh16-like	8.9e-57	186.9	12.8
Neonectria faginata AR 4307	Prot_9327	PF11489.3	Aim21	0.00045	14	0.6
Neonectria faginata AR 4307	Prot_5994	PF11578.3	DUF3237	7.1e-32	104.8	0.2
Neonectria faginata AR 4307	Prot_595	PF11745.3	DUF3304	0.0035	12.6	0.1
Neonectria faginata AR 4307	Prot_2892	PF11748.3	DUF3306	0.48	6.2	0.2
Neonectria faginata AR 4307	Prot_1072	PF03889.8	ArfA	0.0085	10.5	0
Neonectria faginata AR 4307	Prot_4328	PF11808.3	PhoR	0.0026	12.9	0
Neonectria faginata AR 4307	Prot_5890	PF11862.3	DUF3382	0.6	5.2	0
Neonectria faginata AR 4307	Prot_9445	PF11936.3	DUF3454	0.015	10.6	0.3
Neonectria faginata AR 4307	Prot_11435	PF11937.3	DUF3455	6.8e-25	83.1	0
Neonectria faginata AR 4307	Prot_7353	PF12131.3	DUF3586	0.00025	16.2	1.6
Neonectria faginata AR 4307	Prot_12439	PF12259.3	Baculo_F	0.006	10.3	0
Neonectria faginata AR 4307	Prot_8548	PF12435.3	DUF3678	0.092	7.5	9.7
Neonectria faginata AR 4307	Prot_2892	PF12501.3	DUF3708	0.046	8.6	0
Neonectria faginata AR 4307	Prot_863	PF12611.3	Flagellar_put	0.44	5.2	0
Neonectria faginata AR 4307	Prot_5075	PF04041.8	Glyco_hydro_130	0.0039	10.9	0
Neonectria faginata AR 4307	Prot_5365	PF12877.2	DUF3827	0.0024	11	11.3
Neonectria faginata AR 4307	Prot_378	PF13128.1	DUF3954	1.1	3.8	2.4
Neonectria faginata AR 4307	Prot_4342	PF13254.1	DUF4045	0.0052	11.1	11.5
Neonectria faginata AR 4307	Prot_12439	PF13770.1	DUF4169	0.00091	14.3	4.7
Neonectria faginata AR 4307	Prot_11756	PF14258.1	DUF4350	0.0052	12.1	0
Neonectria faginata AR 4307	Prot_2892	PF14283.1	DUF4366	5e-05	17.9	0.7
Neonectria faginata AR 4307	Prot_6886	PF14283.1	DUF4366	0.003	12	1.4
Neonectria faginata AR 4307	Prot_3725	PF14316.1	DUF4381	0.0033	12.6	0.3
Neonectria faginata AR 4307	Prot_6169	PF14488.1	DUF4434	0.00039	15.2	0
Neonectria faginata AR 4307	Prot_11234	PF14610.1	DUF4448	0.00021	15.8	0
Neonectria faginata AR 4307	Prot_11422	PF14610.1	DUF4448	0.00096	13.7	0
Neonectria faginata AR 4307	Prot_8890	PF14610.1	DUF4448	0.0048	11.4	0
Neonectria faginata AR 4307	Prot_2721	PF14610.1	DUF4448	0.007	10.9	0
Neonectria faginata AR 4307	Prot_6957	PF14739.1	DUF4472	0.0081	11.7	0.5
Neonectria faginata AR 4307	Prot_5619	PF14946.1	DUF4501	0.019	9.5	3.3
Neonectria faginata AR 4307	Prot_4234	PF14986.1	DUF4514	0.0072	11.3	0
Neonectria faginata AR 4307	Prot_3239	PF14988.1	DUF4515	0.0019	12.9	0.4
Neonectria faginata AR 4307	Prot_1339	PF15087.1	DUF4551	0.0038	10.6	2.6
Neonectria faginata AR 4307	Prot_4342	PF15087.1	DUF4551	6.2	0	10.2
Neonectria faginata AR 4307	Prot_3469	PF15087.1	DUF4551	6.9	-0.1	18
Neonectria faginata AR 4307	Prot_2842	PF15257.1	DUF4590	0.0035	12.2	0
Neonectria faginata AR 4307	Prot_6886	PF15391.1	DUF4614	0.0044	11.9	13.1
Neonectria faginata AR 4307	Prot_6905	PF15399.1	DUF4620	0.89	4.8	0.3
Neonectria faginata AR 4307	Prot_4969	PF04370.7	DUF508	0.014	10.1	2.2
Neonectria faginata AR 4307	Prot_6072	PF04415.7	DUF515	0.01	9.1	3
Neonectria faginata AR 4307	Prot_4023	PF04415.7	DUF515	0.23	4.7	8
Neonectria faginata AR 4307	Prot_6886	PF04415.7	DUF515	7.9	-0.4	17.6
Neonectria faginata AR 4307	Prot_6279	PF04484.7	QWRF	0.62	4.5	12.1
Neonectria faginata AR 4307	Prot_5365	PF04502.8	DUF572	0.46	4.7	12.5
Neonectria faginata AR 4307	Prot_2721	PF04502.8	DUF572	6.5	0.9	13.4
Neonectria faginata AR 4307	Prot_9075	PF04652.11	Vta1	0.16	6.4	10.3
Neonectria faginata AR 4307	Prot_10929	PF04652.11	Vta1	13	0	16.7
Neonectria faginata AR 4307	Prot_3073	PF06004.7	DUF903	0.0034	12	0
Neonectria faginata AR 4307	Prot_2490	PF06028.6	DUF915	0.0009	13.4	0
Neonectria faginata AR 4307	Prot_3469	PF06075.7	DUF936	0.45	4.4	25.7
Neonectria faginata AR 4307	Prot_3178	PF06131.6	DUF963	1.8e-06	22.2	0.9
Neonectria faginata AR 4307	Prot_4342	PF06136.8	DUF966	0.5	4.7	10.6
Neonectria faginata AR 4307	Prot_6264	PF06136.8	DUF966	4.2	1.7	21.9
Neonectria faginata AR 4307	Prot_2284	PF02221.10	E1_DerP2_DerF2	6.9e-26	86.2	0.1
Neonectria faginata AR 4307	Prot_5489	PF12454.3	Ecm33	0.0011	13.9	0.1
Neonectria faginata AR 4307	Prot_8136	PF00036.27	EF-hand_1	1.2	3.9	0.2
Neonectria faginata AR 4307	Prot_8136	PF13202.1	EF-hand_5	0.2	6.2	1.2
Neonectria faginata AR 4307	Prot_7379	PF12947.2	EGF_3	0.041	9	5.5
Neonectria faginata AR 4307	Prot_4467	PF06441.7	EHN	6.5e-28	92	0.4
Neonectria faginata AR 4307	Prot_2468	PF01105.19	EMP24_GP25L	4.9e-45	148.5	0
Neonectria faginata AR 4307	Prot_2927	PF12218.3	End_N_terminal	0.0018	12.9	0.6
Neonectria faginata AR 4307	Prot_12439	PF14575.1	EphA2_TM	0.00015	17.2	0
Neonectria faginata AR 4307	Prot_3725	PF14654.1	Epiglycanin_C	0.00067	14.7	0
Neonectria faginata AR 4307	Prot_9791	PF07749.7	ERp29	1.9e-25	84.4	0.5
Neonectria faginata AR 4307	Prot_4602	PF10503.4	Esterase_phd	4.4e-27	89.8	0.2
Neonectria faginata AR 4307	Prot_11566	PF10503.4	Esterase_phd	0.0025	12.1	0
Neonectria faginata AR 4307	Prot_5365	PF04621.8	ETS_PEA3_N	0.0058	10.9	6.5
Neonectria faginata AR 4307	Prot_6201	PF03372.18	Exo_endo_phos	6.6e-16	54	0.1
Neonectria faginata AR 4307	Prot_1052	PF03372.18	Exo_endo_phos	2.1e-07	26.2	0.4
Neonectria faginata AR 4307	Prot_595	PF00890.19	FAD_binding_2	7.6e-08	26.6	0.2
Neonectria faginata AR 4307	Prot_3135	PF00890.19	FAD_binding_2	2.6e-08	28.1	4
Neonectria faginata AR 4307	Prot_11406	PF00890.19	FAD_binding_2	2.4e-07	24.9	0.1
Neonectria faginata AR 4307	Prot_11166	PF00890.19	FAD_binding_2	9.7e-05	16.4	0
Neonectria faginata AR 4307	Prot_10477	PF00890.19	FAD_binding_2	0.0013	12.6	0.1
Neonectria faginata AR 4307	Prot_9341	PF00890.19	FAD_binding_2	0.00098	13.1	0.2
Neonectria faginata AR 4307	Prot_7648	PF00890.19	FAD_binding_2	0.0011	12.9	0.2
Neonectria faginata AR 4307	Prot_10860	PF00890.19	FAD_binding_2	0.0014	12.5	0.3
Neonectria faginata AR 4307	Prot_6125	PF00890.19	FAD_binding_2	0.0066	10.3	0.6
Neonectria faginata AR 4307	Prot_595	PF01494.14	FAD_binding_3	4e-07	24.4	0.6
Neonectria faginata AR 4307	Prot_3135	PF01494.14	FAD_binding_3	2.9e-06	21.6	0.6
Neonectria faginata AR 4307	Prot_256	PF01494.14	FAD_binding_3	0.0011	13.1	0.1
Neonectria faginata AR 4307	Prot_11406	PF01494.14	FAD_binding_3	0.0021	12.2	0.1
Neonectria faginata AR 4307	Prot_567	PF01565.18	FAD_binding_4	5.6e-29	95.5	3.2
Neonectria faginata AR 4307	Prot_1313	PF01565.18	FAD_binding_4	2.5e-27	90.1	3.6
Neonectria faginata AR 4307	Prot_11537	PF01565.18	FAD_binding_4	1.3e-26	87.8	0.3
Neonectria faginata AR 4307	Prot_2830	PF01565.18	FAD_binding_4	2.4e-26	86.9	1.2
Neonectria faginata AR 4307	Prot_1533	PF01565.18	FAD_binding_4	2.7e-26	86.8	0.5
Neonectria faginata AR 4307	Prot_11630	PF01565.18	FAD_binding_4	1.2e-25	84.7	1.9
Neonectria faginata AR 4307	Prot_8520	PF01565.18	FAD_binding_4	1.4e-21	71.5	0.2
Neonectria faginata AR 4307	Prot_4042	PF01565.18	FAD_binding_4	8.7e-22	72.2	5.6
Neonectria faginata AR 4307	Prot_10872	PF01565.18	FAD_binding_4	1.3e-20	68.3	1.4
Neonectria faginata AR 4307	Prot_5598	PF01565.18	FAD_binding_4	8.5e-20	65.7	2.3
Neonectria faginata AR 4307	Prot_6015	PF01565.18	FAD_binding_4	1.3e-18	61.9	0.4
Neonectria faginata AR 4307	Prot_4469	PF01565.18	FAD_binding_4	4.1e-18	60.3	0.1
Neonectria faginata AR 4307	Prot_7816	PF01565.18	FAD_binding_4	1.5e-17	58.5	0.8
Neonectria faginata AR 4307	Prot_3135	PF12831.2	FAD_oxidored	7.8e-10	33.4	0.3
Neonectria faginata AR 4307	Prot_11406	PF12831.2	FAD_oxidored	7.2e-08	26.9	0.1
Neonectria faginata AR 4307	Prot_595	PF12831.2	FAD_oxidored	1.2e-07	26.2	1.1
Neonectria faginata AR 4307	Prot_3469	PF15265.1	FAM196	0.37	5	26.3
Neonectria faginata AR 4307	Prot_566	PF15265.1	FAM196	13	-0.2	33.5
Neonectria faginata AR 4307	Prot_4573	PF02469.17	Fasciclin	1e-16	56.2	0.1
Neonectria faginata AR 4307	Prot_11285	PF00611.18	FCH	1.3e-11	39.7	0
Neonectria faginata AR 4307	Prot_1339	PF14691.1	Fer4_20	0.21	6.4	1
Neonectria faginata AR 4307	Prot_9466	PF13668.1	Ferritin_2	2.6e-18	61.4	0
Neonectria faginata AR 4307	Prot_8136	PF01839.18	FG-GAP	8.2e-05	17.3	0.2
Neonectria faginata AR 4307	Prot_11404	PF01839.18	FG-GAP	0.00016	16.4	0.6
Neonectria faginata AR 4307	Prot_6196	PF02782.11	FGGY_C	0.0057	11.3	0
Neonectria faginata AR 4307	Prot_11144	PF08884.6	Flagellin_D3	0.072	8.4	1.6
Neonectria faginata AR 4307	Prot_3239	PF02465.13	FliD_N	2.9	3.4	0.7
Neonectria faginata AR 4307	Prot_7249	PF14310.1	Fn3-like	2.8e-23	76.7	0.1
Neonectria faginata AR 4307	Prot_2494	PF14686.1	fn3_3	2.5e-18	61.1	3.9
Neonectria faginata AR 4307	Prot_1219	PF14686.1	fn3_3	2.6e-15	51.4	4.2
Neonectria faginata AR 4307	Prot_7876	PF14686.1	fn3_3	8.3e-11	37	0.4
Neonectria faginata AR 4307	Prot_2183	PF02434.11	Fringe	0.00011	16.6	0
Neonectria faginata AR 4307	Prot_4436	PF03959.8	FSH1	0.0013	13.3	0
Neonectria faginata AR 4307	Prot_6196	PF14450.1	FtsA	0.037	9	1.5
Neonectria faginata AR 4307	Prot_12668	PF01392.17	FZ	0.025	10	0.7
Neonectria faginata AR 4307	Prot_6923	PF06202.9	GDE_C	0.00016	15.5	0
Neonectria faginata AR 4307	Prot_5727	PF00799.15	Gemini_AL1	0.0082	11.1	1.1
Neonectria faginata AR 4307	Prot_3267	PF08283.6	Gemini_AL1_M	0.0047	11.8	0.1
Neonectria faginata AR 4307	Prot_9862	PF00288.21	GHMP_kinases_N	0.003	12.7	0
Neonectria faginata AR 4307	Prot_3135	PF01134.17	GIDA	3.6e-06	21.1	0.5
Neonectria faginata AR 4307	Prot_595	PF01134.17	GIDA	5.7e-06	20.4	0.1
Neonectria faginata AR 4307	Prot_11166	PF01134.17	GIDA	0.0082	10	0.1
Neonectria faginata AR 4307	Prot_11406	PF01134.17	GIDA	0.00023	15.2	0.1
Neonectria faginata AR 4307	Prot_10860	PF01134.17	GIDA	0.11	6.3	0.3
Neonectria faginata AR 4307	Prot_1041	PF01832.15	Glucosaminidase	0.18	7	0
Neonectria faginata AR 4307	Prot_9791	PF00462.19	Glutaredoxin	0.92	4.7	0.1
Neonectria faginata AR 4307	Prot_113	PF13436.1	Gly-zipper_OmpA	0.0043	11.8	3.6
Neonectria faginata AR 4307	Prot_10742	PF14845.1	Glycohydro_20b2	7.8e-23	76.6	0
Neonectria faginata AR 4307	Prot_2892	PF01102.13	Glycophorin_A	1.4e-05	19.9	0.3
Neonectria faginata AR 4307	Prot_4328	PF01102.13	Glycophorin_A	0.13	7.1	8.6
Neonectria faginata AR 4307	Prot_6758	PF00331.15	Glyco_hydro_10	1.5e-97	321.5	0
Neonectria faginata AR 4307	Prot_3057	PF00331.15	Glyco_hydro_10	0.00031	14.9	0
Neonectria faginata AR 4307	Prot_6072	PF00457.12	Glyco_hydro_11	2.6e-82	269.7	18.8
Neonectria faginata AR 4307	Prot_8854	PF00457.12	Glyco_hydro_11	4.8e-82	268.8	20.2
Neonectria faginata AR 4307	Prot_1901	PF03537.8	Glyco_hydro_114	1.6e-26	87	0.4
Neonectria faginata AR 4307	Prot_5896	PF01670.11	Glyco_hydro_12	1.4e-30	101.2	2.1
Neonectria faginata AR 4307	Prot_4491	PF01670.11	Glyco_hydro_12	5.8e-10	34.2	0.3
Neonectria faginata AR 4307	Prot_4297	PF00722.16	Glyco_hydro_16	1.9e-45	149.5	2.9
Neonectria faginata AR 4307	Prot_12609	PF00722.16	Glyco_hydro_16	9.5e-43	140.7	7.2
Neonectria faginata AR 4307	Prot_6264	PF00722.16	Glyco_hydro_16	5.6e-42	138.2	1.2
Neonectria faginata AR 4307	Prot_10700	PF00722.16	Glyco_hydro_16	4.2e-40	132.1	2.6
Neonectria faginata AR 4307	Prot_5489	PF00722.16	Glyco_hydro_16	2.8e-40	132.6	2.5
Neonectria faginata AR 4307	Prot_5000	PF00722.16	Glyco_hydro_16	2.5e-19	64.4	0.4
Neonectria faginata AR 4307	Prot_8528	PF00722.16	Glyco_hydro_16	8.7e-18	59.3	0.1
Neonectria faginata AR 4307	Prot_599	PF00722.16	Glyco_hydro_16	1.6e-14	48.7	0.2
Neonectria faginata AR 4307	Prot_12696	PF00722.16	Glyco_hydro_16	3.8e-14	47.4	0.3
Neonectria faginata AR 4307	Prot_3073	PF00722.16	Glyco_hydro_16	4e-14	47.4	3.9
Neonectria faginata AR 4307	Prot_1690	PF00722.16	Glyco_hydro_16	5.3e-13	43.7	4.4
Neonectria faginata AR 4307	Prot_138	PF00722.16	Glyco_hydro_16	8.2e-08	26.8	0
Neonectria faginata AR 4307	Prot_3299	PF00332.13	Glyco_hydro_17	2.6e-11	38.1	0.2
Neonectria faginata AR 4307	Prot_4093	PF00332.13	Glyco_hydro_17	2.7e-05	18.4	0.1
Neonectria faginata AR 4307	Prot_6421	PF00704.23	Glyco_hydro_18	6.9e-95	313.4	9.6
Neonectria faginata AR 4307	Prot_2358	PF00704.23	Glyco_hydro_18	1.2e-94	312.6	10.2
Neonectria faginata AR 4307	Prot_3414	PF00704.23	Glyco_hydro_18	1.1e-49	164.7	0.1
Neonectria faginata AR 4307	Prot_12079	PF00704.23	Glyco_hydro_18	2.6e-47	156.9	0.3
Neonectria faginata AR 4307	Prot_7506	PF00704.23	Glyco_hydro_18	1.3e-07	26.4	0
Neonectria faginata AR 4307	Prot_9481	PF00703.16	Glyco_hydro_2	3.3e-16	54.8	0.1
Neonectria faginata AR 4307	Prot_7459	PF00703.16	Glyco_hydro_2	1.7e-13	46.1	0.1
Neonectria faginata AR 4307	Prot_10742	PF00728.17	Glyco_hydro_20	2.1e-89	295.1	0
Neonectria faginata AR 4307	Prot_10742	PF02838.10	Glyco_hydro_20b	1.6e-06	23.8	0
Neonectria faginata AR 4307	Prot_11456	PF00295.12	Glyco_hydro_28	1.7e-104	344.4	20.2
Neonectria faginata AR 4307	Prot_9551	PF00295.12	Glyco_hydro_28	5e-98	323	20.2
Neonectria faginata AR 4307	Prot_7481	PF00295.12	Glyco_hydro_28	1.7e-28	94.6	13.4
Neonectria faginata AR 4307	Prot_5027	PF00295.12	Glyco_hydro_28	1.8e-46	153.6	4.2
Neonectria faginata AR 4307	Prot_3250	PF00295.12	Glyco_hydro_28	1.6e-42	140.7	0.1
Neonectria faginata AR 4307	Prot_5097	PF00295.12	Glyco_hydro_28	1.2e-35	118	5.1
Neonectria faginata AR 4307	Prot_10858	PF00295.12	Glyco_hydro_28	3.9e-24	80.2	0.1
Neonectria faginata AR 4307	Prot_9481	PF02836.12	Glyco_hydro_2_C	8.6e-30	98.7	0
Neonectria faginata AR 4307	Prot_7459	PF02836.12	Glyco_hydro_2_C	5.8e-14	46.7	0.1
Neonectria faginata AR 4307	Prot_3057	PF02836.12	Glyco_hydro_2_C	5.6e-09	30.3	0
Neonectria faginata AR 4307	Prot_6551	PF02836.12	Glyco_hydro_2_C	4.1e-07	24.2	0.1
Neonectria faginata AR 4307	Prot_9481	PF02837.13	Glyco_hydro_2_N	6.4e-35	115.2	0
Neonectria faginata AR 4307	Prot_7459	PF02837.13	Glyco_hydro_2_N	2e-30	100.6	0.1
Neonectria faginata AR 4307	Prot_7249	PF00933.16	Glyco_hydro_3	1.5e-82	272	0
Neonectria faginata AR 4307	Prot_11538	PF00251.15	Glyco_hydro_32N	3.8e-06	21.5	0
Neonectria faginata AR 4307	Prot_12645	PF00251.15	Glyco_hydro_32N	0.00078	13.9	0.2
Neonectria faginata AR 4307	Prot_7249	PF01915.17	Glyco_hydro_3_C	5.1e-41	135.7	0
Neonectria faginata AR 4307	Prot_3057	PF02449.10	Glyco_hydro_42	7.2e-06	20.3	0
Neonectria faginata AR 4307	Prot_11538	PF04616.9	Glyco_hydro_43	5.1e-55	181.6	3.4
Neonectria faginata AR 4307	Prot_12645	PF04616.9	Glyco_hydro_43	4.8e-51	168.6	3.2
Neonectria faginata AR 4307	Prot_3117	PF04616.9	Glyco_hydro_43	7e-43	141.8	7
Neonectria faginata AR 4307	Prot_11144	PF04616.9	Glyco_hydro_43	1.5e-38	127.6	6.4
Neonectria faginata AR 4307	Prot_12438	PF04616.9	Glyco_hydro_43	1.3e-23	78.6	0
Neonectria faginata AR 4307	Prot_5809	PF04616.9	Glyco_hydro_43	1.4e-19	65.3	2.2
Neonectria faginata AR 4307	Prot_10463	PF04616.9	Glyco_hydro_43	5.5e-14	46.9	5.8
Neonectria faginata AR 4307	Prot_7208	PF02015.11	Glyco_hydro_45	5.5e-89	292.6	19.5
Neonectria faginata AR 4307	Prot_10820	PF07745.8	Glyco_hydro_53	1.8e-103	340.8	0.1
Neonectria faginata AR 4307	Prot_5695	PF03443.9	Glyco_hydro_61	2.2e-79	261.3	0.1
Neonectria faginata AR 4307	Prot_7869	PF03443.9	Glyco_hydro_61	7.3e-75	246.5	0.2
Neonectria faginata AR 4307	Prot_10403	PF03443.9	Glyco_hydro_61	2.3e-63	209	0
Neonectria faginata AR 4307	Prot_3378	PF03443.9	Glyco_hydro_61	1.1e-52	174	0
Neonectria faginata AR 4307	Prot_4588	PF00840.15	Glyco_hydro_7	2.6e-156	515.3	11
Neonectria faginata AR 4307	Prot_6169	PF03659.9	Glyco_hydro_71	4.6e-90	296.9	3
Neonectria faginata AR 4307	Prot_1450	PF03659.9	Glyco_hydro_71	3.9e-34	112.7	1.8
Neonectria faginata AR 4307	Prot_6551	PF03198.9	Glyco_hydro_72	1.5e-125	413.3	6
Neonectria faginata AR 4307	Prot_9939	PF03198.9	Glyco_hydro_72	5.2e-124	408.3	4.7
Neonectria faginata AR 4307	Prot_9472	PF07335.6	Glyco_hydro_75	2.8e-47	155.5	0.1
Neonectria faginata AR 4307	Prot_7823	PF03663.9	Glyco_hydro_76	7.8e-154	507.5	20
Neonectria faginata AR 4307	Prot_9655	PF03663.9	Glyco_hydro_76	1.1e-18	62.8	0.1
Neonectria faginata AR 4307	Prot_74	PF03663.9	Glyco_hydro_76	0.0089	10.4	0
Neonectria faginata AR 4307	Prot_74	PF07470.8	Glyco_hydro_88	2.3e-63	209.3	1.2
Neonectria faginata AR 4307	Prot_1255	PF11790.3	Glyco_hydro_cc	4e-67	221.2	2.8
Neonectria faginata AR 4307	Prot_9939	PF11790.3	Glyco_hydro_cc	0.00034	15.1	0.2
Neonectria faginata AR 4307	Prot_9513	PF05637.7	Glyco_transf_34	4.8e-17	57.3	0.2
Neonectria faginata AR 4307	Prot_5258	PF01501.15	Glyco_transf_8	2.1e-14	48.5	2.1
Neonectria faginata AR 4307	Prot_10932	PF10648.4	Gmad2	0.49	5.7	0.1
Neonectria faginata AR 4307	Prot_10860	PF05199.8	GMC_oxred_C	1.9e-42	140	0
Neonectria faginata AR 4307	Prot_10477	PF05199.8	GMC_oxred_C	4.3e-32	106.4	0
Neonectria faginata AR 4307	Prot_9341	PF05199.8	GMC_oxred_C	3.7e-31	103.4	0
Neonectria faginata AR 4307	Prot_6125	PF05199.8	GMC_oxred_C	1.7e-29	98	0
Neonectria faginata AR 4307	Prot_595	PF05199.8	GMC_oxred_C	1.8e-20	68.8	0.1
Neonectria faginata AR 4307	Prot_10860	PF00732.14	GMC_oxred_N	3.9e-53	175.5	0.3
Neonectria faginata AR 4307	Prot_10477	PF00732.14	GMC_oxred_N	1.1e-22	75.6	0
Neonectria faginata AR 4307	Prot_9341	PF00732.14	GMC_oxred_N	6.1e-26	86.3	0
Neonectria faginata AR 4307	Prot_6125	PF00732.14	GMC_oxred_N	6.9e-25	82.8	0
Neonectria faginata AR 4307	Prot_595	PF00732.14	GMC_oxred_N	1.8e-24	81.4	0
Neonectria faginata AR 4307	Prot_11406	PF00732.14	GMC_oxred_N	0.0056	10.9	0
Neonectria faginata AR 4307	Prot_6421	PF06714.6	Gp5_OB	0.0024	13	0.3
Neonectria faginata AR 4307	Prot_10868	PF01825.16	GPS	0.00073	14.7	0.1
Neonectria faginata AR 4307	Prot_265	PF07995.6	GSDH	4.6e-07	24.2	0.5
Neonectria faginata AR 4307	Prot_3716	PF12693.2	GspL_C	0.015	10.1	1.3
Neonectria faginata AR 4307	Prot_4237	PF09065.5	Haemadin	0.047	8.4	0.2
Neonectria faginata AR 4307	Prot_2721	PF04388.7	Hamartin	2.7	1.5	14
Neonectria faginata AR 4307	Prot_6062	PF14856.1	Hce2	1.2e-14	49.1	0.1
Neonectria faginata AR 4307	Prot_4248	PF14856.1	Hce2	2.1e-11	38.7	0.1
Neonectria faginata AR 4307	Prot_7204	PF14701.1	hDGE_amylase	0.0015	12.5	0
Neonectria faginata AR 4307	Prot_8890	PF04375.9	HemX	0.0037	10.9	0.1
Neonectria faginata AR 4307	Prot_4328	PF04375.9	HemX	0.0064	10.1	0.6
Neonectria faginata AR 4307	Prot_5365	PF05109.8	Herpes_BLLF1	0.0033	10.5	30.6
Neonectria faginata AR 4307	Prot_3469	PF05109.8	Herpes_BLLF1	7.8	-0.7	51.5
Neonectria faginata AR 4307	Prot_5301	PF06112.6	Herpes_capsid	0.31	6.2	20.9
Neonectria faginata AR 4307	Prot_4808	PF06112.6	Herpes_capsid	0.73	4.9	21.9
Neonectria faginata AR 4307	Prot_5393	PF05297.6	Herpes_LMP1	2.2	2.1	10
Neonectria faginata AR 4307	Prot_7561	PF07217.6	Het-C	3.5e-288	951.9	0
Neonectria faginata AR 4307	Prot_4297	PF03753.8	HHV6-IE	5.5	-0.7	24.5
Neonectria faginata AR 4307	Prot_595	PF03486.9	HI0933_like	3.2e-08	27.5	0.2
Neonectria faginata AR 4307	Prot_3135	PF03486.9	HI0933_like	1.4e-06	22.1	3.3
Neonectria faginata AR 4307	Prot_11406	PF03486.9	HI0933_like	5.1e-06	20.2	0
Neonectria faginata AR 4307	Prot_11166	PF03486.9	HI0933_like	0.00015	15.4	0
Neonectria faginata AR 4307	Prot_10860	PF03486.9	HI0933_like	0.0067	9.9	0.2
Neonectria faginata AR 4307	Prot_5393	PF12722.2	Hid1	0.81	2.3	8.6
Neonectria faginata AR 4307	Prot_2721	PF12722.2	Hid1	6.5	-0.7	11.9
Neonectria faginata AR 4307	Prot_6264	PF12722.2	Hid1	7.7	-1	18.7
Neonectria faginata AR 4307	Prot_5600	PF00300.17	His_Phos_1	0.0032	12.6	0
Neonectria faginata AR 4307	Prot_5600	PF00328.17	His_Phos_2	1.8e-25	85	0
Neonectria faginata AR 4307	Prot_5872	PF00328.17	His_Phos_2	8.4e-09	30.2	0.1
Neonectria faginata AR 4307	Prot_6121	PF00505.14	HMG_box	0.00084	14.7	0
Neonectria faginata AR 4307	Prot_6121	PF09011.5	HMG_box_2	0.0013	14.1	0
Neonectria faginata AR 4307	Prot_4342	PF00220.12	Hormone_4	0.2	6.6	0.1
Neonectria faginata AR 4307	Prot_3366	PF13933.1	HRXXH	6.7e-107	351.5	0
Neonectria faginata AR 4307	Prot_5432	PF12296.3	HsbA	5.4e-06	21.4	2.1
Neonectria faginata AR 4307	Prot_9587	PF12296.3	HsbA	0.0031	12.5	5.9
Neonectria faginata AR 4307	Prot_6196	PF00012.15	HSP70	1.8e-269	889.8	15.1
Neonectria faginata AR 4307	Prot_12252	PF13560.1	HTH_31	0.011	11	0
Neonectria faginata AR 4307	Prot_6196	PF01968.13	Hydantoinase_A	0.00069	13.8	0.1
Neonectria faginata AR 4307	Prot_10383	PF12146.3	Hydrolase_4	3.2e-05	18.8	0
Neonectria faginata AR 4307	Prot_731	PF12146.3	Hydrolase_4	0.00016	16.6	0
Neonectria faginata AR 4307	Prot_2490	PF12146.3	Hydrolase_4	0.00064	14.6	0
Neonectria faginata AR 4307	Prot_11756	PF12146.3	Hydrolase_4	0.0057	11.6	0
Neonectria faginata AR 4307	Prot_132	PF06766.6	Hydrophobin_2	4.9e-28	91.7	8.1
Neonectria faginata AR 4307	Prot_3188	PF12179.3	IKKbetaNEMObind	0.019	9.9	2.7
Neonectria faginata AR 4307	Prot_3135	PF07991.7	IlvN	0.00039	14.9	0.7
Neonectria faginata AR 4307	Prot_7333	PF15569.1	Imm40	0.07	8	0.6
Neonectria faginata AR 4307	Prot_2207	PF04156.9	?	0.073	7.7	3.8
Neonectria faginata AR 4307	Prot_5621	PF05922.11	Inhibitor_I9	9.8e-18	59.6	0.1
Neonectria faginata AR 4307	Prot_9671	PF05922.11	Inhibitor_I9	3.1e-17	58	0
Neonectria faginata AR 4307	Prot_12643	PF05922.11	Inhibitor_I9	2.6e-16	55.1	0.4
Neonectria faginata AR 4307	Prot_12285	PF05922.11	Inhibitor_I9	9.7e-09	30.8	0.2
Neonectria faginata AR 4307	Prot_10397	PF05922.11	Inhibitor_I9	2.2e-05	20	0.1
Neonectria faginata AR 4307	Prot_1052	PF01419.12	Jacalin	4e-07	25	0
Neonectria faginata AR 4307	Prot_11302	PF02373.17	JmjC	0.0068	11.7	0
Neonectria faginata AR 4307	Prot_6886	PF08552.6	Kei1	11	0.7	10.2
Neonectria faginata AR 4307	Prot_1047	PF00109.21	ketoacyl-synt	1.1e-10	36.5	0.2
Neonectria faginata AR 4307	Prot_1047	PF02801.17	ketoacyl-synt_C	1.2e-27	91.2	0
Neonectria faginata AR 4307	Prot_11166	PF13434.1	K_oxygenase	2.7e-05	18.2	0
Neonectria faginata AR 4307	Prot_11406	PF13434.1	K_oxygenase	0.2	5.5	0.1
Neonectria faginata AR 4307	Prot_6014	PF10282.4	Lactonase	6.1e-69	227.7	0
Neonectria faginata AR 4307	Prot_8476	PF10282.4	Lactonase	4.3e-23	76.9	0.6
Neonectria faginata AR 4307	Prot_265	PF10282.4	Lactonase	0.027	8.6	0.1
Neonectria faginata AR 4307	Prot_1664	PF15042.1	LELP1	0.0041	12.4	8.4
Neonectria faginata AR 4307	Prot_11566	PF15221.1	LEP503	0.0081	11	0
Neonectria faginata AR 4307	Prot_1552	PF02900.13	LigB	6.1e-51	168	0.2
Neonectria faginata AR 4307	Prot_5365	PF03353.10	Lin-8	0.19	6	9.4
Neonectria faginata AR 4307	Prot_5014	PF03583.9	LIP	1.9e-73	242.2	0.5
Neonectria faginata AR 4307	Prot_11566	PF03583.9	LIP	0.0038	11.5	0
Neonectria faginata AR 4307	Prot_4577	PF01674.13	Lipase_2	0.0012	13.2	1.9
Neonectria faginata AR 4307	Prot_2490	PF01764.20	Lipase_3	0.0088	10.7	0
Neonectria faginata AR 4307	Prot_9514	PF00657.17	Lipase_GDSL	7.2e-13	43.9	0.3
Neonectria faginata AR 4307	Prot_3329	PF00657.17	Lipase_GDSL	1.1e-10	36.8	0
Neonectria faginata AR 4307	Prot_11404	PF00657.17	Lipase_GDSL	1.7e-10	36.2	0
Neonectria faginata AR 4307	Prot_6467	PF00657.17	Lipase_GDSL	3.1e-07	25.5	0.4
Neonectria faginata AR 4307	Prot_2044	PF00657.17	Lipase_GDSL	1.6e-06	23.1	0
Neonectria faginata AR 4307	Prot_8412	PF00657.17	Lipase_GDSL	0.021	9.7	0
Neonectria faginata AR 4307	Prot_3329	PF13472.1	Lipase_GDSL_2	4.9e-14	47.9	0
Neonectria faginata AR 4307	Prot_8136	PF13472.1	Lipase_GDSL_2	5.3e-11	38	0
Neonectria faginata AR 4307	Prot_11404	PF13472.1	Lipase_GDSL_2	1.3e-10	36.7	0.1
Neonectria faginata AR 4307	Prot_8412	PF13472.1	Lipase_GDSL_2	0.0035	12.6	0.6
Neonectria faginata AR 4307	Prot_11404	PF14606.1	Lipase_GDSL_3	3.7e-06	21.8	0
Neonectria faginata AR 4307	Prot_2721	PF04791.11	LMBR1	0.011	9.4	0.4
Neonectria faginata AR 4307	Prot_3267	PF02169.11	LPP20	0.0033	12.6	0.2
Neonectria faginata AR 4307	Prot_10860	PF05834.7	Lycopene_cycl	3e-06	21.4	0.1
Neonectria faginata AR 4307	Prot_595	PF05834.7	Lycopene_cycl	3.2e-05	18	0.4
Neonectria faginata AR 4307	Prot_11406	PF05834.7	Lycopene_cycl	0.00022	15.3	0
Neonectria faginata AR 4307	Prot_6125	PF05834.7	Lycopene_cycl	0.00037	14.5	0
Neonectria faginata AR 4307	Prot_3135	PF05834.7	Lycopene_cycl	0.0014	12.6	0.2
Neonectria faginata AR 4307	Prot_11166	PF05834.7	Lycopene_cycl	0.0035	11.3	0.1
Neonectria faginata AR 4307	Prot_10477	PF05834.7	Lycopene_cycl	0.0033	11.4	0
Neonectria faginata AR 4307	Prot_3412	PF01476.15	LysM	4.3e-06	21.6	0
Neonectria faginata AR 4307	Prot_6809	PF01476.15	LysM	1.9e-06	22.8	0.1
Neonectria faginata AR 4307	Prot_8561	PF07687.9	M20_dimer	2.2e-18	61.1	0
Neonectria faginata AR 4307	Prot_4023	PF09726.4	Macoilin	0.015	8.6	4
Neonectria faginata AR 4307	Prot_7379	PF09726.4	Macoilin	0.035	7.4	7.7
Neonectria faginata AR 4307	Prot_5365	PF09726.4	Macoilin	0.053	6.8	14.6
Neonectria faginata AR 4307	Prot_6886	PF09726.4	Macoilin	0.13	5.5	11.4
Neonectria faginata AR 4307	Prot_5301	PF09726.4	Macoilin	0.14	5.3	7.3
Neonectria faginata AR 4307	Prot_5393	PF09726.4	Macoilin	0.16	5.2	17.2
Neonectria faginata AR 4307	Prot_6279	PF09726.4	Macoilin	0.25	4.5	13.3
Neonectria faginata AR 4307	Prot_4342	PF09726.4	Macoilin	0.98	2.6	7.8
Neonectria faginata AR 4307	Prot_6264	PF09726.4	Macoilin	0.87	2.8	21.1
Neonectria faginata AR 4307	Prot_12609	PF09726.4	Macoilin	2.9	1	12.8
Neonectria faginata AR 4307	Prot_7225	PF09726.4	Macoilin	2.3	1.3	14
Neonectria faginata AR 4307	Prot_2721	PF09726.4	Macoilin	6.5	-0.1	20.4
Neonectria faginata AR 4307	Prot_4297	PF09726.4	Macoilin	7.6	-0.3	27.8
Neonectria faginata AR 4307	Prot_3355	PF09726.4	Macoilin	9.5	-0.7	20.6
Neonectria faginata AR 4307	Prot_5365	PF03999.7	MAP65_ASE1	4.6	0.7	14
Neonectria faginata AR 4307	Prot_12526	PF01124.13	MAPEG	1e-20	68.8	0.3
Neonectria faginata AR 4307	Prot_3178	PF02993.9	MCPVI	1.7	3.8	16.8
Neonectria faginata AR 4307	Prot_2721	PF11593.3	Med3	0.00051	14.4	18
Neonectria faginata AR 4307	Prot_4328	PF11593.3	Med3	0.022	9	8.7
Neonectria faginata AR 4307	Prot_4654	PF11593.3	Med3	0.017	9.4	12.5
Neonectria faginata AR 4307	Prot_10868	PF11593.3	Med3	0.054	7.7	5.4
Neonectria faginata AR 4307	Prot_8978	PF11593.3	Med3	1.5	2.9	15
Neonectria faginata AR 4307	Prot_844	PF11593.3	Med3	1.4	3	12.8
Neonectria faginata AR 4307	Prot_4707	PF11593.3	Med3	2.1	2.5	11.4
Neonectria faginata AR 4307	Prot_5301	PF11593.3	Med3	4.2	1.5	18.3
Neonectria faginata AR 4307	Prot_12609	PF11593.3	Med3	16	-0.4	15
Neonectria faginata AR 4307	Prot_1798	PF02065.13	Melibiase	8.8e-09	29.5	0
Neonectria faginata AR 4307	Prot_6886	PF03547.13	Mem_trans	0.0036	10.7	0
Neonectria faginata AR 4307	Prot_9273	PF05053.8	Menin	8.8	-0.7	15.2
Neonectria faginata AR 4307	Prot_2494	PF01420.14	Methylase_S	0.013	10.5	0.1
Neonectria faginata AR 4307	Prot_10820	PF08241.7	Methyltransf_11	3.2e-08	29.1	0
Neonectria faginata AR 4307	Prot_10820	PF08242.7	Methyltransf_12	2e-06	23.3	0
Neonectria faginata AR 4307	Prot_10820	PF12847.2	Methyltransf_18	4.3e-07	25.6	0
Neonectria faginata AR 4307	Prot_10820	PF13489.1	Methyltransf_23	6e-26	86.1	0
Neonectria faginata AR 4307	Prot_56	PF13578.1	Methyltransf_24	0.0011	14.9	0.2
Neonectria faginata AR 4307	Prot_10820	PF13649.1	Methyltransf_25	0.0004	15.8	0
Neonectria faginata AR 4307	Prot_10820	PF13659.1	?	0.03	9.5	0
Neonectria faginata AR 4307	Prot_10820	PF13847.1	Methyltransf_31	0.00063	14.4	0
Neonectria faginata AR 4307	Prot_12668	PF12929.2	Mid1	1.2e-131	434.3	7.7
Neonectria faginata AR 4307	Prot_3469	PF04478.7	Mid2	1.3e-07	26.3	3
Neonectria faginata AR 4307	Prot_8890	PF04478.7	Mid2	0.00044	14.8	0.2
Neonectria faginata AR 4307	Prot_3239	PF13012.1	MitMem_reg	0.12	7.6	0.1
Neonectria faginata AR 4307	Prot_4342	PF09731.4	Mitofilin	0.0013	12.5	4.7
Neonectria faginata AR 4307	Prot_5464	PF09731.4	Mitofilin	0.012	9.2	6.3
Neonectria faginata AR 4307	Prot_3469	PF09731.4	Mitofilin	0.043	7.5	26.9
Neonectria faginata AR 4307	Prot_6264	PF09731.4	Mitofilin	0.12	6	24.1
Neonectria faginata AR 4307	Prot_5320	PF05308.6	Mito_fiss_reg	0.015	9.7	10.2
Neonectria faginata AR 4307	Prot_10929	PF05308.6	Mito_fiss_reg	3.3	2	10.3
Neonectria faginata AR 4307	Prot_642	PF03404.11	My-co_dimer	0.0041	11.8	0
Neonectria faginata AR 4307	Prot_6196	PF06723.8	MreB_MbI	1e-15	52.2	4
Neonectria faginata AR 4307	Prot_844	PF12238.3	MSA-2c	0.00044	15	0.9
Neonectria faginata AR 4307	Prot_6905	PF07462.6	MSP1_C	0.037	7.4	0.1
Neonectria faginata AR 4307	Prot_2842	PF07462.6	MSP1_C	0.97	2.7	9.9
Neonectria faginata AR 4307	Prot_6347	PF07462.6	MSP1_C	1.8	1.8	10.6
Neonectria faginata AR 4307	Prot_844	PF07462.6	MSP1_C	5.2	0.3	9.3
Neonectria faginata AR 4307	Prot_6886	PF07462.6	MSP1_C	10	-0.7	10.2
Neonectria faginata AR 4307	Prot_6886	PF09472.5	MtrF	0.043	8.2	5.7
Neonectria faginata AR 4307	Prot_844	PF01456.12	Mucin	0.0073	11.1	14.3
Neonectria faginata AR 4307	Prot_11472	PF01456.12	Mucin	0.011	10.6	14.4
Neonectria faginata AR 4307	Prot_10464	PF09610.5	Myco_arth_vir_N	0.011	10.8	0.3
Neonectria faginata AR 4307	Prot_3135	PF13241.1	NAD_binding_7	0.00075	14.8	0.1
Neonectria faginata AR 4307	Prot_11406	PF13450.1	NAD_binding_8	4.9e-14	47.2	1
Neonectria faginata AR 4307	Prot_7648	PF13450.1	NAD_binding_8	6.8e-13	43.6	0
Neonectria faginata AR 4307	Prot_3135	PF13450.1	NAD_binding_8	2.9e-12	41.6	0.1
Neonectria faginata AR 4307	Prot_256	PF13450.1	NAD_binding_8	9.3e-07	23.9	0
Neonectria faginata AR 4307	Prot_595	PF13450.1	NAD_binding_8	4.8e-06	21.6	0.3
Neonectria faginata AR 4307	Prot_11166	PF13450.1	NAD_binding_8	0.00016	16.8	0.1
Neonectria faginata AR 4307	Prot_10477	PF13450.1	NAD_binding_8	0.00042	15.4	0.1
Neonectria faginata AR 4307	Prot_9341	PF13450.1	NAD_binding_8	0.00036	15.6	0.1
Neonectria faginata AR 4307	Prot_10860	PF13450.1	NAD_binding_8	0.00092	14.3	0.7
Neonectria faginata AR 4307	Prot_6125	PF13450.1	NAD_binding_8	0.0011	14.1	0
Neonectria faginata AR 4307	Prot_11166	PF13454.1	NAD_binding_9	0.0018	13.1	0
Neonectria faginata AR 4307	Prot_7648	PF13454.1	NAD_binding_9	5.7e-06	21.2	0
Neonectria faginata AR 4307	Prot_11406	PF13454.1	NAD_binding_9	0.01	10.7	0
Neonectria faginata AR 4307	Prot_4234	PF03892.9	NapB	0.0043	11.8	0.2
Neonectria faginata AR 4307	Prot_6264	PF12569.3	NARP1	0.89	3.2	15.7
Neonectria faginata AR 4307	Prot_2490	PF03096.9	Ndr	2.6e-07	24.4	0
Neonectria faginata AR 4307	Prot_731	PF03096.9	Ndr	0.0073	9.8	0
Neonectria faginata AR 4307	Prot_4535	PF01436.16	NHL	0.27	6.5	0
Neonectria faginata AR 4307	Prot_265	PF01436.16	NHL	0.66	5.2	0
Neonectria faginata AR 4307	Prot_3373	PF01436.16	NHL	1.5	4.1	0
Neonectria faginata AR 4307	Prot_1041	PF05450.10	Nicastrin	0.0091	10.3	0
Neonectria faginata AR 4307	Prot_10616	PF05368.8	NmrA	0.002	12.5	0
Neonectria faginata AR 4307	Prot_8927	PF06524.7	NOA36	0.056	7.7	8.8
Neonectria faginata AR 4307	Prot_5890	PF06524.7	NOA36	2.7	2.2	12.9
Neonectria faginata AR 4307	Prot_4199	PF06524.7	NOA36	4.4	1.5	11.8
Neonectria faginata AR 4307	Prot_9327	PF07127.6	Nodulin_late	0.15	7.3	2.6
Neonectria faginata AR 4307	Prot_8927	PF04147.7	Nop14	0.017	8	7.8
Neonectria faginata AR 4307	Prot_5890	PF04147.7	Nop14	0.044	6.7	11.6
Neonectria faginata AR 4307	Prot_678	PF04147.7	Nop14	0.77	2.6	16.8
Neonectria faginata AR 4307	Prot_5393	PF04147.7	Nop14	0.67	2.8	12.8
Neonectria faginata AR 4307	Prot_6279	PF04147.7	Nop14	0.78	2.6	8.3
Neonectria faginata AR 4307	Prot_4297	PF04147.7	Nop14	2.4	0.9	20.9
Neonectria faginata AR 4307	Prot_4510	PF05048.8	NosD	7e-10	33.5	9.7
Neonectria faginata AR 4307	Prot_7616	PF05630.6	NPP1	5.7e-63	207.4	0
Neonectria faginata AR 4307	Prot_5393	PF03666.8	NPR3	0.6	3.6	6.8
Neonectria faginata AR 4307	Prot_6264	PF03666.8	NPR3	5.6	0.4	15.9
Neonectria faginata AR 4307	Prot_4297	PF03666.8	NPR3	9.8	-0.4	14.9
Neonectria faginata AR 4307	Prot_8927	PF03066.10	Nucleoplasmin	0.015	9.9	6.1
Neonectria faginata AR 4307	Prot_1116	PF06516.6	NUP	4.5e-120	395.2	0
Neonectria faginata AR 4307	Prot_5365	PF03189.8	Otopetrin	0.5	4.3	7.1
Neonectria faginata AR 4307	Prot_12291	PF00420.19	Oxidored_q2	0.0063	11.2	0
Neonectria faginata AR 4307	Prot_1645	PF00067.17	p450	7.1e-45	148.4	0
Neonectria faginata AR 4307	Prot_1017	PF07691.7	PA14	1.2e-09	33.1	0.1
Neonectria faginata AR 4307	Prot_1017	PF10528.4	GLEYA	3e-12	41.6	0.1
Neonectria faginata AR 4307	Prot_10820	PF08223.6	PaaX_C	0.0083	10.9	0
Neonectria faginata AR 4307	Prot_11756	PF03403.8	PAF-AH_p_II	6.5e-12	39.4	0
Neonectria faginata AR 4307	Prot_8285	PF03403.8	PAF-AH_p_II	1.8e-06	21.5	0
Neonectria faginata AR 4307	Prot_11566	PF03403.8	PAF-AH_p_II	0.025	7.9	0
Neonectria faginata AR 4307	Prot_4707	PF00024.21	PAN_1	7.6e-07	23.9	0.2
Neonectria faginata AR 4307	Prot_12483	PF00024.21	PAN_1	3.2e-05	18.7	3.7
Neonectria faginata AR 4307	Prot_8234	PF00024.21	PAN_1	0.00016	16.5	0.1
Neonectria faginata AR 4307	Prot_1339	PF08276.6	PAN_2	0.0017	13.3	0.7
Neonectria faginata AR 4307	Prot_12090	PF08276.6	PAN_2	1.7e-05	19.7	0.2
Neonectria faginata AR 4307	Prot_4707	PF08276.6	PAN_2	0.00013	16.8	0.7
Neonectria faginata AR 4307	Prot_7225	PF08276.6	PAN_2	0.0026	12.7	2.2
Neonectria faginata AR 4307	Prot_12483	PF08276.6	PAN_2	0.015	10.2	1.8
Neonectria faginata AR 4307	Prot_4969	PF08277.7	PAN_3	0.00028	15.5	0
Neonectria faginata AR 4307	Prot_1339	PF08277.7	PAN_3	0.00021	15.9	0.3
Neonectria faginata AR 4307	Prot_7225	PF08277.7	PAN_3	0.00039	15.1	1.5
Neonectria faginata AR 4307	Prot_1339	PF14295.1	PAN_4	2e-05	19.3	1.3
Neonectria faginata AR 4307	Prot_4707	PF14295.1	PAN_4	2.2e-06	22.4	0.8
Neonectria faginata AR 4307	Prot_7225	PF14295.1	PAN_4	6.3e-06	20.9	1.4
Neonectria faginata AR 4307	Prot_12090	PF14295.1	PAN_4	6.5e-05	17.7	0.2
Neonectria faginata AR 4307	Prot_12483	PF14295.1	PAN_4	0.00069	14.4	2.4
Neonectria faginata AR 4307	Prot_4969	PF14295.1	PAN_4	0.0017	13.1	0.1
Neonectria faginata AR 4307	Prot_2995	PF14295.1	PAN_4	0.088	7.7	0.6
Neonectria faginata AR 4307	Prot_11302	PF02711.9	Pap_E4	0.0034	13.3	0.1
Neonectria faginata AR 4307	Prot_6264	PF00973.14	Paramyxo_ncap	3.3	1.3	11.9
Neonectria faginata AR 4307	Prot_3178	PF09770.4	PAT1	4.2	0.5	12
Neonectria faginata AR 4307	Prot_2899	PF09770.4	PAT1	5.9	0	16.2
Neonectria faginata AR 4307	Prot_8320	PF07676.7	PD40	1.2e-08	29.6	0.7
Neonectria faginata AR 4307	Prot_4577	PF08237.6	PE-PPE	4e-07	24.7	0.2
Neonectria faginata AR 4307	Prot_844	PF08237.6	PE-PPE	8.3e-07	23.7	0
Neonectria faginata AR 4307	Prot_9701	PF08237.6	PE-PPE	0.00013	16.4	0
Neonectria faginata AR 4307	Prot_7438	PF03211.8	Pectate_lyase	1.4e-76	251.7	4
Neonectria faginata AR 4307	Prot_1756	PF03211.8	Pectate_lyase	8.1e-68	223.1	9.8
Neonectria faginata AR 4307	Prot_9748	PF03211.8	Pectate_lyase	2e-65	215.3	10.1
Neonectria faginata AR 4307	Prot_8320	PF14583.1	Pectate_lyase22	0.015	8.8	0.1
Neonectria faginata AR 4307	Prot_2927	PF12708.2	Pectate_lyase_3	6.8e-68	224.2	6.9
Neonectria faginata AR 4307	Prot_4558	PF12708.2	Pectate_lyase_3	2.3e-10	36	0.2
Neonectria faginata AR 4307	Prot_10858	PF12708.2	Pectate_lyase_3	8e-09	31	7.7
Neonectria faginata AR 4307	Prot_612	PF12708.2	Pectate_lyase_3	1.7e-08	29.9	3.7
Neonectria faginata AR 4307	Prot_12311	PF01095.14	Pectinesterase	5.6e-45	148.2	4
Neonectria faginata AR 4307	Prot_4539	PF01095.14	Pectinesterase	2.3e-45	149.5	0.2
Neonectria faginata AR 4307	Prot_6123	PF01095.14	Pectinesterase	9e-45	147.5	2
Neonectria faginata AR 4307	Prot_4568	PF01095.14	Pectinesterase	6e-28	92.3	0.1
Neonectria faginata AR 4307	Prot_9472	PF00544.14	Pec_lyase_C	8e-46	151.1	5.4
Neonectria faginata AR 4307	Prot_6123	PF00544.14	Pec_lyase_C	7.3e-29	95.7	6.7
Neonectria faginata AR 4307	Prot_6504	PF00544.14	Pec_lyase_C	6.9e-23	76.2	6.2
Neonectria faginata AR 4307	Prot_12961	PF00544.14	Pec_lyase_C	2e-22	74.7	9
Neonectria faginata AR 4307	Prot_551	PF00544.14	Pec_lyase_C	3.1e-20	67.5	7.8
Neonectria faginata AR 4307	Prot_8978	PF00544.14	Pec_lyase_C	9.2e-17	56.2	0.8
Neonectria faginata AR 4307	Prot_9520	PF00544.14	Pec_lyase_C	0.00057	14.4	4.5
Neonectria faginata AR 4307	Prot_4707	PF13599.1	Pentapeptide_4	0.0036	12.2	0.1
Neonectria faginata AR 4307	Prot_7174	PF01650.13	Peptidase_C13	2.9e-37	123.4	0.2
Neonectria faginata AR 4307	Prot_3413	PF00413.19	Peptidase_M10	0.0011	13.8	1.5
Neonectria faginata AR 4307	Prot_5464	PF00413.19	Peptidase_M10	0.00079	14.2	0
Neonectria faginata AR 4307	Prot_12654	PF00413.19	Peptidase_M10	0.00059	14.7	0.2
Neonectria faginata AR 4307	Prot_56	PF00246.19	Peptidase_M14	6.7e-72	237.4	0
Neonectria faginata AR 4307	Prot_12525	PF00246.19	Peptidase_M14	2.4e-67	222.5	0
Neonectria faginata AR 4307	Prot_5596	PF00246.19	Peptidase_M14	6.5e-45	148.9	0.3
Neonectria faginata AR 4307	Prot_12079	PF01244.16	Peptidase_M19	0.00088	13.3	0
Neonectria faginata AR 4307	Prot_8561	PF01546.23	Peptidase_M20	4.4e-24	80.1	0.2
Neonectria faginata AR 4307	Prot_3127	PF01546.23	Peptidase_M20	9.8e-07	23.5	0
Neonectria faginata AR 4307	Prot_1041	PF01546.23	Peptidase_M20	1.3e-06	23.1	0
Neonectria faginata AR 4307	Prot_4777	PF01546.23	Peptidase_M20	4.3e-06	21.4	0
Neonectria faginata AR 4307	Prot_1041	PF04389.12	Peptidase_M28	2.7e-36	120	0.1
Neonectria faginata AR 4307	Prot_3127	PF04389.12	Peptidase_M28	2.2e-32	107.3	0.1
Neonectria faginata AR 4307	Prot_4777	PF04389.12	Peptidase_M28	7.7e-27	89.2	0
Neonectria faginata AR 4307	Prot_8561	PF04389.12	Peptidase_M28	0.00033	15.5	0
Neonectria faginata AR 4307	Prot_8561	PF05343.9	Peptidase_M42	0.00028	14.8	0.3
Neonectria faginata AR 4307	Prot_4777	PF05343.9	Peptidase_M42	0.29	4.9	0
Neonectria faginata AR 4307	Prot_5464	PF05572.8	Peptidase_M43	9.1e-13	43.1	0.2
Neonectria faginata AR 4307	Prot_12654	PF05572.8	Peptidase_M43	1.7e-10	35.8	0
Neonectria faginata AR 4307	Prot_3413	PF12388.3	Peptidase_M57	0.006	11	0
Neonectria faginata AR 4307	Prot_12654	PF12388.3	Peptidase_M57	0.0077	10.6	0.4
Neonectria faginata AR 4307	Prot_3413	PF10462.4	Peptidase_M66	0.0006	13.8	1.2
Neonectria faginata AR 4307	Prot_12654	PF10462.4	Peptidase_M66	0.006	10.5	0.1
Neonectria faginata AR 4307	Prot_11191	PF13485.1	Peptidase_MA_2	1.1e-06	23.8	1.2
Neonectria faginata AR 4307	Prot_5436	PF00450.17	Peptidase_S10	2.9e-85	281.9	0.1
Neonectria faginata AR 4307	Prot_7450	PF00450.17	Peptidase_S10	1.7e-82	272.9	0.1
Neonectria faginata AR 4307	Prot_5211	PF00450.17	Peptidase_S10	4.2e-77	255.1	0.3
Neonectria faginata AR 4307	Prot_8901	PF00450.17	Peptidase_S10	8e-39	129	1
Neonectria faginata AR 4307	Prot_11566	PF02129.13	Peptidase_S15	3.6e-06	21.6	0.2
Neonectria faginata AR 4307	Prot_8233	PF05577.7	Peptidase_S28	3.7e-51	169.1	0
Neonectria faginata AR 4307	Prot_7225	PF08192.6	Peptidase_S64	0.19	5	12.4
Neonectria faginata AR 4307	Prot_5365	PF08192.6	Peptidase_S64	1.4	2.1	15.4
Neonectria faginata AR 4307	Prot_6264	PF08192.6	Peptidase_S64	4.8	0.4	18.3
Neonectria faginata AR 4307	Prot_12285	PF00082.17	Peptidase_S8	2.1e-48	159.9	17.3
Neonectria faginata AR 4307	Prot_12643	PF00082.17	Peptidase_S8	4.7e-47	155.5	10.7
Neonectria faginata AR 4307	Prot_1024	PF00082.17	Peptidase_S8	7.8e-47	154.8	2.3
Neonectria faginata AR 4307	Prot_9671	PF00082.17	Peptidase_S8	2e-44	146.8	18.5
Neonectria faginata AR 4307	Prot_10397	PF00082.17	Peptidase_S8	1.3e-43	144.2	13.3
Neonectria faginata AR 4307	Prot_5621	PF00082.17	Peptidase_S8	2.8e-40	133.3	14.8
Neonectria faginata AR 4307	Prot_9475	PF00082.17	Peptidase_S8	4.8e-24	80	0
Neonectria faginata AR 4307	Prot_11403	PF00082.17	Peptidase_S8	4.9e-10	34	0.3
Neonectria faginata AR 4307	Prot_3318	PF00326.16	Peptidase_S9	6.5e-37	121.8	1.2
Neonectria faginata AR 4307	Prot_4602	PF00326.16	Peptidase_S9	6.4e-11	36.9	3
Neonectria faginata AR 4307	Prot_11566	PF00326.16	Peptidase_S9	8.4e-06	20.2	0
Neonectria faginata AR 4307	Prot_12850	PF00326.16	Peptidase_S9	8.7e-06	20.1	0.1
Neonectria faginata AR 4307	Prot_4436	PF00326.16	Peptidase_S9	0.0053	11	0
Neonectria faginata AR 4307	Prot_2490	PF00326.16	Peptidase_S9	0.035	8.3	0
Neonectria faginata AR 4307	Prot_3365	PF00326.16	Peptidase_S9	0.0064	10.8	0
Neonectria faginata AR 4307	Prot_4590	PF00326.16	Peptidase_S9	0.0059	10.9	0
Neonectria faginata AR 4307	Prot_5301	PF12114.3	Period_C	5.8	1.5	14.3
Neonectria faginata AR 4307	Prot_678	PF12114.3	Period_C	0.82	4.3	4.8
Neonectria faginata AR 4307	Prot_6115	PF00141.18	peroxidase	7.7e-49	161.3	0
Neonectria faginata AR 4307	Prot_9768	PF00141.18	peroxidase	4.5e-25	83.5	0
Neonectria faginata AR 4307	Prot_6886	PF04695.8	PEX14_N	0.00019	16.5	2.8
Neonectria faginata AR 4307	Prot_4234	PF04695.8	PEX14_N	0.13	7.4	0.2
Neonectria faginata AR 4307	Prot_2892	PF04695.8	PEX14_N	0.0061	11.7	1.3
Neonectria faginata AR 4307	Prot_10086	PF10333.4	Pga1	0.0002	16.1	0
Neonectria faginata AR 4307	Prot_2490	PF07819.8	PGAP1	7.1e-05	17.5	0
Neonectria faginata AR 4307	Prot_4436	PF07819.8	PGAP1	0.0029	12.3	0
Neonectria faginata AR 4307	Prot_1552	PF09587.5	PGA_cap	0.00093	13.6	0
Neonectria faginata AR 4307	Prot_2906	PF09096.5	Phage-tail_2	0.0074	11	0
Neonectria faginata AR 4307	Prot_12439	PF05356.6	Phage_Coat_B	0.0072	11.1	0.5
Neonectria faginata AR 4307	Prot_11482	PF05371.7	Phage_Coat_Gp8	0.0081	10.8	0.1
Neonectria faginata AR 4307	Prot_4588	PF05798.6	Phage_FRD3	0.0042	12.5	0
Neonectria faginata AR 4307	Prot_4235	PF00959.14	Phage_lysozyme	2.4e-15	51.9	0
Neonectria faginata AR 4307	Prot_11215	PF09056.6	Phospholip_A2_3	4e-46	150.9	0.2
Neonectria faginata AR 4307	Prot_2892	PF00922.12	Phosphoprotein	0.11	6.7	3.5
Neonectria faginata AR 4307	Prot_2892	PF05795.6	Plasmodium_Vir	4.2e-05	17.9	0.7
Neonectria faginata AR 4307	Prot_6886	PF05795.6	Plasmodium_Vir	0.0016	12.8	0.1
Neonectria faginata AR 4307	Prot_4936	PF05795.6	Plasmodium_Vir	0.027	8.7	5.8
Neonectria faginata AR 4307	Prot_2721	PF05795.6	Plasmodium_Vir	0.77	3.9	8.4
Neonectria faginata AR 4307	Prot_2228	PF01690.12	PLRV_ORF5	2.3	2.3	10.1
Neonectria faginata AR 4307	Prot_8890	PF05808.6	Podoplanin	1.3e-05	19.9	0.2
Neonectria faginata AR 4307	Prot_6886	PF05808.6	Podoplanin	1.8e-05	19.4	14
Neonectria faginata AR 4307	Prot_113	PF05808.6	Podoplanin	0.00019	16.1	0.4
Neonectria faginata AR 4307	Prot_4328	PF05808.6	Podoplanin	0.00029	15.5	4.4
Neonectria faginata AR 4307	Prot_11238	PF05808.6	Podoplanin	0.0055	11.3	0.2
Neonectria faginata AR 4307	Prot_7379	PF05808.6	Podoplanin	0.0047	11.6	5.8
Neonectria faginata AR 4307	Prot_2892	PF05808.6	Podoplanin	0.19	6.3	9.9
Neonectria faginata AR 4307	Prot_642	PF01357.16	Pollen_allerg_1	0.00019	16.3	2.6
Neonectria faginata AR 4307	Prot_11537	PF01620.11	Pollen_allerg_2	0.037	9.4	3.3
Neonectria faginata AR 4307	Prot_7418	PF01522.16	Polysacc_deac_1	2e-27	90.4	0
Neonectria faginata AR 4307	Prot_4697	PF01522.16	Polysacc_deac_1	9.6e-16	52.6	0
Neonectria faginata AR 4307	Prot_7557	PF06184.6	Potex_coat	0.099	7.1	0
Neonectria faginata AR 4307	Prot_5211	PF04151.10	PPC	0.029	10.5	0
Neonectria faginata AR 4307	Prot_8927	PF09184.6	PPP4R2	0.061	7.9	10.2
Neonectria faginata AR 4307	Prot_1661	PF01011.16	PQQ	0.035	8.8	0
Neonectria faginata AR 4307	Prot_1661	PF13360.1	PQQ_2	1.1e-17	59.3	3.1
Neonectria faginata AR 4307	Prot_1661	PF13570.1	PQQ_3	0.34	6.4	1.1
Neonectria faginata AR 4307	Prot_7648	PF07156.9	Prenylcys_lyase	1e-20	69	0
Neonectria faginata AR 4307	Prot_6886	PF01080.12	Presenilin	0.038	7.8	2.6
Neonectria faginata AR 4307	Prot_2132	PF06798.7	PrkA	0.0056	11	0
Neonectria faginata AR 4307	Prot_11403	PF09286.6	Pro-kuma_activ	1.5e-36	120.7	0
Neonectria faginata AR 4307	Prot_3239	PF05478.6	Prominin	0.031	6.8	0.2
Neonectria faginata AR 4307	Prot_56	PF02244.11	Propep_M14	0.0043	11.8	0
Neonectria faginata AR 4307	Prot_8320	PF10584.4	Proteasome_A_N	0.14	6.7	0
Neonectria faginata AR 4307	Prot_9824	PF01241.13	PSI_PSAK	0.01	11	0.6
Neonectria faginata AR 4307	Prot_3135	PF00070.22	Pyr_redox	1.8e-05	20.2	0.5
Neonectria faginata AR 4307	Prot_11406	PF00070.22	Pyr_redox	4.4e-05	18.9	0
Neonectria faginata AR 4307	Prot_595	PF00070.22	Pyr_redox	0.00077	14.9	0.5
Neonectria faginata AR 4307	Prot_11166	PF07992.9	Pyr_redox_2	3.9e-16	54.6	0
Neonectria faginata AR 4307	Prot_3135	PF07992.9	Pyr_redox_2	2.1e-08	29.3	0.4
Neonectria faginata AR 4307	Prot_595	PF07992.9	Pyr_redox_2	4.4e-07	25	0.1
Neonectria faginata AR 4307	Prot_11406	PF07992.9	Pyr_redox_2	1.2e-05	20.3	0.1
Neonectria faginata AR 4307	Prot_7648	PF07992.9	Pyr_redox_2	0.00053	15	0.1
Neonectria faginata AR 4307	Prot_6125	PF07992.9	Pyr_redox_2	6.9e-05	17.9	0
Neonectria faginata AR 4307	Prot_9341	PF07992.9	Pyr_redox_2	0.00085	14.3	0
Neonectria faginata AR 4307	Prot_10477	PF07992.9	Pyr_redox_2	0.001	14	0
Neonectria faginata AR 4307	Prot_10860	PF07992.9	Pyr_redox_2	0.0035	12.3	0.1
Neonectria faginata AR 4307	Prot_11166	PF13738.1	Pyr_redox_3	0.0011	14.1	0
Neonectria faginata AR 4307	Prot_11406	PF13738.1	Pyr_redox_3	2.1e-05	19.7	0
Neonectria faginata AR 4307	Prot_6125	PF13738.1	Pyr_redox_3	2.4e-06	22.8	0
Neonectria faginata AR 4307	Prot_3135	PF13738.1	Pyr_redox_3	4e-07	25.3	0.1
Neonectria faginata AR 4307	Prot_7648	PF13738.1	Pyr_redox_3	9.4e-05	17.6	0
Neonectria faginata AR 4307	Prot_595	PF13738.1	Pyr_redox_3	0.0031	12.6	0
Neonectria faginata AR 4307	Prot_9341	PF13738.1	Pyr_redox_3	0.047	8.8	0
Neonectria faginata AR 4307	Prot_10860	PF13738.1	Pyr_redox_3	0.011	10.9	0.1
Neonectria faginata AR 4307	Prot_9511	PF14930.1	Qn_am_d_aII	0.0099	10.9	0
Neonectria faginata AR 4307	Prot_113	PF07218.6	RAP1	0.071	6.2	6.6
Neonectria faginata AR 4307	Prot_4328	PF07218.6	RAP1	0.85	2.6	7.7
Neonectria faginata AR 4307	Prot_2842	PF07218.6	RAP1	1.1	2.2	10.1
Neonectria faginata AR 4307	Prot_863	PF07218.6	RAP1	1.8	1.5	7.9
Neonectria faginata AR 4307	Prot_4936	PF07218.6	RAP1	1.7	1.6	9.5
Neonectria faginata AR 4307	Prot_5301	PF07218.6	RAP1	2.2	1.3	14.5
Neonectria faginata AR 4307	Prot_7225	PF07218.6	RAP1	11	-1.1	12.8
Neonectria faginata AR 4307	Prot_113	PF12768.2	Rax2	1.2e-05	19.8	0
Neonectria faginata AR 4307	Prot_4199	PF12768.2	Rax2	0.00054	14.3	0
Neonectria faginata AR 4307	Prot_265	PF13540.1	RCC1_2	0.41	5.5	0
Neonectria faginata AR 4307	Prot_2892	PF12273.3	RCR	0.0015	14.1	9.5
Neonectria faginata AR 4307	Prot_3725	PF12273.3	RCR	3.7	3.2	12.7
Neonectria faginata AR 4307	Prot_4199	PF01030.19	Recep_L_domain	0.0012	13.9	0
Neonectria faginata AR 4307	Prot_6264	PF07964.6	Red1	0.68	3	21.9
Neonectria faginata AR 4307	Prot_9791	PF08534.5	Redoxin	0.00018	16.2	0
Neonectria faginata AR 4307	Prot_5464	PF13574.1	Reprolysin_2	2.8e-05	19.3	0
Neonectria faginata AR 4307	Prot_12654	PF13574.1	Reprolysin_2	2.6e-05	19.4	0
Neonectria faginata AR 4307	Prot_3413	PF13574.1	Reprolysin_2	6.4e-05	18.1	0
Neonectria faginata AR 4307	Prot_5464	PF13582.1	Reprolysin_3	4.4e-08	28.8	0
Neonectria faginata AR 4307	Prot_12654	PF13582.1	Reprolysin_3	5.9e-05	18.7	0
Neonectria faginata AR 4307	Prot_3413	PF13582.1	Reprolysin_3	0.00099	14.7	0
Neonectria faginata AR 4307	Prot_5464	PF13583.1	Reprolysin_4	5.4e-08	27.7	0
Neonectria faginata AR 4307	Prot_3413	PF13583.1	Reprolysin_4	2.8e-06	22	0.1
Neonectria faginata AR 4307	Prot_12654	PF13583.1	Reprolysin_4	0.00057	14.5	0.2
Neonectria faginata AR 4307	Prot_5464	PF13688.1	Reprolysin_5	7.2e-09	30.9	0
Neonectria faginata AR 4307	Prot_3413	PF13688.1	Reprolysin_5	2.1e-05	19.5	0.1
Neonectria faginata AR 4307	Prot_12654	PF13688.1	Reprolysin_5	6.6e-05	18	0.1
Neonectria faginata AR 4307	Prot_1463	PF04589.8	RFX1_trans_act	0.044	8.6	1.3
Neonectria faginata AR 4307	Prot_2494	PF09284.5	RhgB_N	3.1e-98	323.1	10.2
Neonectria faginata AR 4307	Prot_1219	PF09284.5	RhgB_N	5.6e-72	237.1	4.3
Neonectria faginata AR 4307	Prot_11285	PF00620.22	RhoGAP	8.3e-16	53	0.1
Neonectria faginata AR 4307	Prot_9487	PF00545.15	Ribonuclease	2.8e-22	73.7	0.1
Neonectria faginata AR 4307	Prot_10200	PF00445.13	Ribonuclease_T2	8.1e-46	151.1	1.3
Neonectria faginata AR 4307	Prot_1219	PF14200.1	RicinB_lectin_2	0.0046	12.4	0.2
Neonectria faginata AR 4307	Prot_2721	PF02009.11	RIFIN	0.0062	11.2	0
Neonectria faginata AR 4307	Prot_4654	PF02009.11	RIFIN	0.048	8.3	10.5
Neonectria faginata AR 4307	Prot_5365	PF02009.11	RIFIN	0.73	4.4	14.9
Neonectria faginata AR 4307	Prot_5301	PF02009.11	RIFIN	3.9	2.1	10.7
Neonectria faginata AR 4307	Prot_5890	PF08208.6	RNA_polI_A34	0.087	7.5	6.5
Neonectria faginata AR 4307	Prot_6264	PF06459.7	RR_TM4-6	1.7	3.5	18.6
Neonectria faginata AR 4307	Prot_4023	PF08595.6	RXT2_N	0.048	8.5	3.9
Neonectria faginata AR 4307	Prot_9514	PF02574.11	S-methyl_trans	0.0058	11	0
Neonectria faginata AR 4307	Prot_9824	PF02265.11	S1-P1_nuclease	7.3e-69	227.2	0
Neonectria faginata AR 4307	Prot_5393	PF04499.10	SASP	0.81	3.2	8.3
Neonectria faginata AR 4307	Prot_6264	PF04499.10	SASP	4.8	0.7	16.4
Neonectria faginata AR 4307	Prot_10589	PF01547.20	SBP_bac_1	0.00015	16.6	0.1
Neonectria faginata AR 4307	Prot_603	PF07596.6	SBP_bac_10	0.00026	16.1	0.6
Neonectria faginata AR 4307	Prot_10589	PF13531.1	SBP_bac_11	0.00036	15.3	1
Neonectria faginata AR 4307	Prot_10589	PF13343.1	SBP_bac_6	0.002	12.5	0
Neonectria faginata AR 4307	Prot_10589	PF13416.1	SBP_bac_8	0.0047	11.7	0.1
Neonectria faginata AR 4307	Prot_4023	PF05285.7	SDA1	0.0071	10.7	6
Neonectria faginata AR 4307	Prot_678	PF03958.12	Secretin_N	0.0016	13.7	0.9
Neonectria faginata AR 4307	Prot_3378	PF04360.7	Serglycin	0.0026	12.6	1.6
Neonectria faginata AR 4307	Prot_678	PF04360.7	Serglycin	0.0075	11.1	2
Neonectria faginata AR 4307	Prot_7622	PF04360.7	Serglycin	0.25	6.1	20
Neonectria faginata AR 4307	Prot_4808	PF04360.7	Serglycin	460	-34.8	64.6
Neonectria faginata AR 4307	Prot_3239	PF02403.17	Seryl_tRNA_N	0.036	9.2	0.1
Neonectria faginata AR 4307	Prot_4535	PF08450.7	SGL	4.7e-08	27.7	0
Neonectria faginata AR 4307	Prot_8476	PF08450.7	SGL	5.1e-05	17.8	0.1
Neonectria faginata AR 4307	Prot_265	PF08450.7	SGL	0.0043	11.5	0
Neonectria faginata AR 4307	Prot_10403	PF08239.6	SH3_3	0.053	8.8	0.9
Neonectria faginata AR 4307	Prot_7648	PF01488.15	Shikimate_DH	0.0032	12.6	0.1
Neonectria faginata AR 4307	Prot_4023	PF04546.8	Sigma70_ner	0.25	6	4
Neonectria faginata AR 4307	Prot_3239	PF05565.6	Shipo_gp157	0.0045	11.6	0
Neonectria faginata AR 4307	Prot_11422	PF08693.5	SKG6	4.4e-08	27.4	0.3
Neonectria faginata AR 4307	Prot_8062	PF08693.5	SKG6	9.4e-08	26.4	0
Neonectria faginata AR 4307	Prot_2721	PF08693.5	SKG6	2.6e-06	21.8	0.1
Neonectria faginata AR 4307	Prot_4199	PF08693.5	SKG6	3.2e-05	18.3	2.6
Neonectria faginata AR 4307	Prot_4328	PF08693.5	SKG6	0.0002	15.7	1.3
Neonectria faginata AR 4307	Prot_6886	PF08693.5	SKG6	0.00041	14.7	2.4
Neonectria faginata AR 4307	Prot_11234	PF08693.5	SKG6	0.0017	12.7	0.1
Neonectria faginata AR 4307	Prot_12439	PF08693.5	SKG6	0.0047	11.3	0.7
Neonectria faginata AR 4307	Prot_8890	PF08693.5	SKG6	0.0041	11.5	1.8
Neonectria faginata AR 4307	Prot_8528	PF03935.10	SKN1	3.1e-06	20.6	0.2
Neonectria faginata AR 4307	Prot_5000	PF03935.10	SKN1	0.00047	13.4	0.9
Neonectria faginata AR 4307	Prot_599	PF03935.10	SKN1	0.00094	12.4	0.1
Neonectria faginata AR 4307	Prot_5312	PF00080.15	Sod_Cu	5e-14	47.7	0
Neonectria faginata AR 4307	Prot_12836	PF10428.4	SOG2	0.22	5.1	11.7
Neonectria faginata AR 4307	Prot_1052	PF06525.6	SoxE	0.00075	13.9	0
Neonectria faginata AR 4307	Prot_8412	PF14313.1	Soyouz_module	0.0019	12.9	0.1
Neonectria faginata AR 4307	Prot_7788	PF04573.7	SPC22	1.7e-25	84.3	0
Neonectria faginata AR 4307	Prot_11482	PF12138.3	Spherulin4	1e-37	125	0.5
Neonectria faginata AR 4307	Prot_1067	PF05642.6	Sporozoite_P67	0.0007	12.6	6.4
Neonectria faginata AR 4307	Prot_6886	PF05642.6	Sporozoite_P67	0.9	2.3	20.8
Neonectria faginata AR 4307	Prot_9075	PF00622.23	SPRY	4.6e-20	67.1	0
Neonectria faginata AR 4307	Prot_4436	PF10500.4	SR-25	4.8	1.6	15.3
Neonectria faginata AR 4307	Prot_10042	PF06933.6	SSP160	3.5	0.5	16.1
Neonectria faginata AR 4307	Prot_3412	PF06933.6	SSP160	0.6	3	2.2
Neonectria faginata AR 4307	Prot_10932	PF12191.3	stn_TNFRSF12A	0.14	7.3	0
Neonectria faginata AR 4307	Prot_1463	PF04270.8	Strep_his_triad	0.059	8.2	0.1
Neonectria faginata AR 4307	Prot_6014	PF03088.11	Str_synth	0.16	7.1	0
Neonectria faginata AR 4307	Prot_2892	PF05843.9	Suf	0.074	7.8	7.5
Neonectria faginata AR 4307	Prot_7896	PF01975.12	SurE	1.5e-42	140.2	0
Neonectria faginata AR 4307	Prot_8890	PF01034.15	Syndecan	0.0068	11.2	1.9
Neonectria faginata AR 4307	Prot_6886	PF01034.15	Syndecan	0.0083	10.9	0.2
Neonectria faginata AR 4307	Prot_6154	PF07519.6	Tannase	2.1e-148	490	3.9
Neonectria faginata AR 4307	Prot_2995	PF07519.6	Tannase	4.5e-42	139.3	0.1
Neonectria faginata AR 4307	Prot_3355	PF14541.1	TAXi_C	0.00022	15.9	0
Neonectria faginata AR 4307	Prot_10962	PF14541.1	TAXi_C	0.00014	16.5	0
Neonectria faginata AR 4307	Prot_1396	PF14541.1	TAXi_C	0.00023	15.8	0
Neonectria faginata AR 4307	Prot_1396	PF14543.1	TAXi_N	1.7e-10	36.2	0.1
Neonectria faginata AR 4307	Prot_10962	PF14543.1	TAXi_N	2.7e-06	22.5	0.1
Neonectria faginata AR 4307	Prot_603	PF14543.1	TAXi_N	0.00034	15.7	0.3
Neonectria faginata AR 4307	Prot_11404	PF12256.3	TcdB_toxin_midN	0.0025	12.3	0.1
Neonectria faginata AR 4307	Prot_8136	PF12256.3	TcdB_toxin_midN	0.00045	14.7	0
Neonectria faginata AR 4307	Prot_566	PF03153.8	TFIIA	0.0009	14.2	12.3
Neonectria faginata AR 4307	Prot_2721	PF03153.8	TFIIA	0.016	10.2	8.1
Neonectria faginata AR 4307	Prot_6264	PF05793.7	TFIIF_alpha	0.17	5.2	28.7
Neonectria faginata AR 4307	Prot_678	PF05793.7	TFIIF_alpha	0.16	5.3	18.5
Neonectria faginata AR 4307	Prot_3135	PF01946.12	Thi4	6e-07	23.8	1.2
Neonectria faginata AR 4307	Prot_595	PF01946.12	Thi4	6.7e-06	20.4	0.2
Neonectria faginata AR 4307	Prot_11406	PF01946.12	Thi4	6.4e-05	17.2	0.2
Neonectria faginata AR 4307	Prot_7648	PF01946.12	Thi4	0.0011	13.1	0.1
Neonectria faginata AR 4307	Prot_11166	PF01946.12	Thi4	0.0029	11.7	0
Neonectria faginata AR 4307	Prot_10477	PF00899.16	ThiF	0.0042	12	0
Neonectria faginata AR 4307	Prot_9341	PF00899.16	ThiF	0.0082	11	0
Neonectria faginata AR 4307	Prot_9791	PF00085.15	Thioredoxin	1.1e-30	100.5	0
Neonectria faginata AR 4307	Prot_9791	PF13098.1	Thioredoxin_2	1.6e-10	36.3	0
Neonectria faginata AR 4307	Prot_9791	PF13192.1	Thioredoxin_3	0.01	10.8	0
Neonectria faginata AR 4307	Prot_9791	PF13462.1	Thioredoxin_4	0.024	9.7	0.1
Neonectria faginata AR 4307	Prot_9791	PF13848.1	Thioredoxin_6	0.00081	14.3	0
Neonectria faginata AR 4307	Prot_9791	PF13899.1	Thioredoxin_7	8.5e-07	24	0
Neonectria faginata AR 4307	Prot_9791	PF13905.1	Thioredoxin_8	2.7e-07	25.8	0
Neonectria faginata AR 4307	Prot_9791	PF14595.1	Thioredoxin_9	0.036	8.7	0
Neonectria faginata AR 4307	Prot_4697	PF06283.6	ThuA	0.011	10.5	0
Neonectria faginata AR 4307	Prot_6264	PF11711.3	Tim54	0.027	8.1	12.8
Neonectria faginata AR 4307	Prot_9472	PF12457.3	TIP_N	0.0096	11.1	0.1
Neonectria faginata AR 4307	Prot_6886	PF15102.1	TMEM154	0.00068	14.4	3
Neonectria faginata AR 4307	Prot_12439	PF15345.1	TMEM51	0.0035	12.1	0
Neonectria faginata AR 4307	Prot_2721	PF15345.1	TMEM51	0.007	11.1	0.1
Neonectria faginata AR 4307	Prot_8287	PF08402.5	TOBE_2	0.0073	11.4	0
Neonectria faginata AR 4307	Prot_10932	PF15531.1	Ntox27	0.0005	15	0
Neonectria faginata AR 4307	Prot_10483	PF05980.7	Toxin_7	0.01	11	1
Neonectria faginata AR 4307	Prot_6072	PF05980.7	Toxin_7	0.39	5.9	9.9
Neonectria faginata AR 4307	Prot_6264	PF15331.1	TP53IP5	13	0.6	16.6
Neonectria faginata AR 4307	Prot_4555	PF02343.11	TRA-1_regulated	0.014	9.9	0.6
Neonectria faginata AR 4307	Prot_2641	PF13729.1	TraF_2	0.0027	11.6	0.1
Neonectria faginata AR 4307	Prot_7503	PF01938.15	TRAM	0.087	7.7	0
Neonectria faginata AR 4307	Prot_12677	PF03896.11	TRAP_alpha	1.2e-10	35.9	0.1
Neonectria faginata AR 4307	Prot_4539	PF12477.3	TraW_N	0.026	9.6	0.3
Neonectria faginata AR 4307	Prot_6923	PF01204.13	Trehalase	7.2e-123	405.9	8.7
Neonectria faginata AR 4307	Prot_595	PF02254.13	TrkA_N	0.023	9.8	0.1
Neonectria faginata AR 4307	Prot_3135	PF02254.13	TrkA_N	0.011	10.8	0.3
Neonectria faginata AR 4307	Prot_595	PF04820.9	Trp_halogenase	0.00067	13.4	0.4
Neonectria faginata AR 4307	Prot_10860	PF04820.9	Trp_halogenase	0.007	10	0.5
Neonectria faginata AR 4307	Prot_3135	PF04820.9	Trp_halogenase	0.019	8.6	1.7
Neonectria faginata AR 4307	Prot_2284	PF14558.1	TRP_N	0.00079	14.5	0.1
Neonectria faginata AR 4307	Prot_113	PF09534.5	Trp_oprn_chp	0.0021	12.8	0.3
Neonectria faginata AR 4307	Prot_8624	PF00089.21	Trypsin	1.8e-66	218.9	5.4
Neonectria faginata AR 4307	Prot_8539	PF00089.21	Trypsin	2.4e-66	218.5	5
Neonectria faginata AR 4307	Prot_8624	PF13365.1	Trypsin_2	3.6e-05	18.8	0.9
Neonectria faginata AR 4307	Prot_146	PF00264.15	Tyrosinase	4.9e-51	169	4
Neonectria faginata AR 4307	Prot_1028	PF00264.15	Tyrosinase	9.1e-50	164.9	3.9
Neonectria faginata AR 4307	Prot_10261	PF00264.15	Tyrosinase	1.1e-49	164.6	0
Neonectria faginata AR 4307	Prot_6121	PF00264.15	Tyrosinase	8.2e-37	122.5	0.8
Neonectria faginata AR 4307	Prot_10820	PF01209.13	Ubie_methyltran	0.019	9.1	0
Neonectria faginata AR 4307	Prot_3585	PF12640.2	UPF04089	0.0075	11.5	0.1
Neonectria faginata AR 4307	Prot_3469	PF04615.8	Utp14	1.3	2.1	21.9
Neonectria faginata AR 4307	Prot_8136	PF13517.1	VCBS	9.8e-13	43.4	0.9
Neonectria faginata AR 4307	Prot_11404	PF13517.1	VCBS	8e-12	40.5	1.8
Neonectria faginata AR 4307	Prot_7380	PF14554.1	VEGF_C	0.062	8.3	6.7
Neonectria faginata AR 4307	Prot_6264	PF08432.5	Vfa1	1.1	4.4	22.3
Neonectria faginata AR 4307	Prot_9701	PF06057.6	VirJ	0.00038	15.3	0
Neonectria faginata AR 4307	Prot_3239	PF00426.13	VP4_haemagglut	0.0005	13.2	2.4
Neonectria faginata AR 4307	Prot_113	PF07589.6	PEP-CTERM	0.25	6.4	1
Neonectria faginata AR 4307	Prot_8890	PF03302.8	VSP	0.22	5.1	8.8
Neonectria faginata AR 4307	Prot_2275	PF01822.14	WSC	9.3e-21	68.7	3.3
Neonectria faginata AR 4307	Prot_6886	PF01822.14	WSC	2.1e-13	45.1	10.4
Neonectria faginata AR 4307	Prot_566	PF01822.14	WSC	1.4e-12	42.5	0.4
Neonectria faginata AR 4307	Prot_2899	PF01822.14	WSC	4.5e-09	31.2	5.8
Neonectria faginata AR 4307	Prot_6551	PF07983.8	X8	1.5e-23	78.2	3.2
Neonectria faginata AR 4307	Prot_2771	PF05658.9	YadA_head	0.024	10	0.9
Neonectria faginata AR 4307	Prot_6264	PF05758.7	Ycf1	6.2	-0.6	14.6
Neonectria faginata AR 4307	Prot_113	PF04893.12	Yip1	0.0018	12.8	0.2
Neonectria faginata AR 4307	Prot_1756	PF11106.3	YjbE	0.0018	13.3	0.3
Neonectria faginata AR 4307	Prot_9273	PF13866.1	zf-SAP30	0.027	9.2	1.3

## Sheet: CBS 134246 peptidases
Predicted peptidases CBS 134246
Prot_1024	PF00082.17	Peptidase_S8
Prot_10397	PF00082.17	Peptidase_S8
Prot_1041	PF01546.23	Peptidase_M20
Prot_1041	PF04389.12	Peptidase_M28
Prot_11191	PF13485.1	Peptidase_MA_2
Prot_11403	PF00082.17	Peptidase_S8
Prot_11566	PF02129.13	Peptidase_S15
Prot_11566	PF00326.16	Peptidase_S9
Prot_12079	PF01244.16	Peptidase_M19
Prot_12285	PF00082.17	Peptidase_S8
Prot_12525	PF00246.19	Peptidase_M14
Prot_12643	PF00082.17	Peptidase_S8
Prot_12654	PF00413.19	Peptidase_M10
Prot_12654	PF05572.8	Peptidase_M43
Prot_12654	PF12388.3	Peptidase_M57
Prot_12654	PF10462.4	Peptidase_M66
Prot_12850	PF00326.16	Peptidase_S9
Prot_2490	PF00326.16	Peptidase_S9
Prot_3127	PF01546.23	Peptidase_M20
Prot_3127	PF04389.12	Peptidase_M28
Prot_3318	PF00326.16	Peptidase_S9
Prot_3365	PF00326.16	Peptidase_S9
Prot_3413	PF00413.19	Peptidase_M10
Prot_3413	PF12388.3	Peptidase_M57
Prot_3413	PF10462.4	Peptidase_M66
Prot_4436	PF00326.16	Peptidase_S9
Prot_4590	PF00326.16	Peptidase_S9
Prot_4602	PF00326.16	Peptidase_S9
Prot_4777	PF01546.23	Peptidase_M20
Prot_4777	PF04389.12	Peptidase_M28
Prot_4777	PF05343.9	Peptidase_M42
Prot_5211	PF00450.17	Peptidase_S10
Prot_5365	PF08192.6	Peptidase_S64
Prot_5436	PF00450.17	Peptidase_S10
Prot_5464	PF00413.19	Peptidase_M10
Prot_5464	PF05572.8	Peptidase_M43
Prot_5596	PF00246.19	Peptidase_M14
Prot_56	PF00246.19	Peptidase_M14
Prot_5621	PF00082.17	Peptidase_S8
Prot_6264	PF08192.6	Peptidase_S64
Prot_7174	PF01650.13	Peptidase_C13
Prot_7225	PF08192.6	Peptidase_S64
Prot_7450	PF00450.17	Peptidase_S10
Prot_8233	PF05577.7	Peptidase_S28
Prot_8561	PF01546.23	Peptidase_M20
Prot_8561	PF04389.12	Peptidase_M28
Prot_8561	PF05343.9	Peptidase_M42
Prot_8901	PF00450.17	Peptidase_S10
Prot_9475	PF00082.17	Peptidase_S8
Prot_9671	PF00082.17	Peptidase_S8
Prot_10962	PF13650.1	Asp_protease_2
Prot_1396	PF13650.1	Asp_protease_2
Prot_603	PF13650.1	Asp_protease_2

## Sheet: CBS 134246 Effectors
Predicted secreted effectors CBS 134246
>AR4307g9217 | Effector probability: 0.69
MRYLVVLLSLLSLANAQFGGFFDQMFGQQGGGHEHQHQHQQQQQAPSDASHYRHFHEHSSCNKYLCPDTLACVSVPHHCPCAWDAHQEKFELAEGQRICVSRGGFREGEAARKVELARKGLL
>AR4307g9273 | Effector probability: 0.873
MKFLIPLSFLIAGAFAQDGCGFPDGPDCVSLGEGANGLEQFADDGCCLLPIRCGNGDGGERCERVAATGNNNNGNANGNTNNNNNNNNNNNNNGNRNNGNRNNGNTNNGNTNNANCGFPNGPDCESLGEGANGLEQFADDGCCLLPFRCGNGDGGERCERVAVAANNRIRFFRAARSRNSRVRK
>AR4307g9511 | Effector probability: 0.602
MARFSLLAAVLALVSAVNAQCGSGTPHARVTGSGSSFTSTRGSSTVYTGSDYRAAIQAAVDSITSGQRVSVIASGSIGANTITIDSGKIFEGCGTINVGTRSGHGAIESLDTTGVQIPYLTMTGNPYFGLRFYGTRDLTLGRITMNLSGGLGIRFDRDQAANSNVKMDVISVTGAGSHAVETWNIDGLTINQVIARDVGESGLLLQKTTNARVGLVDGNNVGAGTGYATLRMANNNGQNPNGNYNTNVQVDKVVSRGGGRGVFCVSQSGAAVITTVDLADNGGNAVLIENCYNLSIRGGTVNGGGEVRVSARTEFPNTKDVWITLKVDGTTVRESPCGDNVNWTLTGNGARNVC
>AR4307g9542 | Effector probability: 0.559
MFSILRVVSLLALVGYSRADFAVGTSASQGGIGEIVPNTGGDIYSTDPVAVSYPGGCLDNVQQFECVSERCLIEGFFEIRGLKTEDQYGFNWNGEGWEFSQNSQTLGFCTKNDDEGCTDTGVNYSLGFFSHMLCTGSINSGF
>AR4307g9748 | Effector probability: 0.913
MLFQVGLLAALVPSALACLGYEGGVPKATTTHSNSKYIEVKKGEADAVFLLREGATLKNAIIGKNQKEGVHCDGHCTLEFVWFEDVCEDAISIKNDKAGKETWIIGGGAYHAEDKVIQHNGCGTVNIINFYAEDYGKVYRSCGNCKSQCKRNVYVEGVTARKGGEVVGINQNYGDTATLKNVCTDAKNPCVMYKGCAGGCEPSKVGYCSG
>AR4307g9862 | Effector probability: 0.736
MVRRVHLLIAGLLALSSQAAAAVDCSGDVLITNARATRKSVINGSLNFGYFGGLTKIILPKLNYVDGTVSLLNLLNITELDNWAIDNLIQLSAGRIPKVSLPFDDLASLSLFHNDVLASVKLPPEAKNWRNLSIDISSCKALNVTSEYDDSKGAAPLGQQVLVEDAPLMPAPGLGGGSALVVLSAGALAALTRNPTEQRTKHHGNVFVPLGRIAREEGILSLSAKVSAYRCL
>AR4307g10464 | Effector probability: 0.979
MVKITILPLAFVAALAAFGEARDCTAKLNYCGSVLLDTVNSNAPLGKYFPQIADELIRSQKTKCIGKNHVMDSVFYCTGGANGEIRYKQFCKNGCKNGGAGKSDHC
>AR4307g10497 | Effector probability: 0.781
MGLVRVFVVAFLFGQLSPAIAADVPINTPSPMLQTAYPACEQFHLAGVGQDCNVLIAFAQIDRAEFFRINPAVNGEQGCTEKIIANTWYCVKAKASHPAPSATANPGPRPTKGRKAPHGGTEKMPKGETKTRKKAQKPKPAKTKMKEPEITKPPVPNYNECVYGDCWYAFGMLSKGDIDKASSASSMCKKVFAEGCKDDMDWPGRVNKLCNSCKELKSACPCFLAGHYHTRTMNPLLYSRKGD
>AR4307g10616 | Effector probability: 0.653
MAVQAAVIGACGATLIHVLSWTLLAGHNAAALVRDSSKLKKMLYIHGVSEETVESHLTIVEGSSRDVKAVVNLLRNDPELIFSGITNLPKFSYNPFLPIGMRDATITGDSVTTVVDALRELKSTSSISNAPVFVPIFSTGHGSQQDQPHLLIPIYMWLLPITSRHSSSVECRAGGCHGC
>AR4307g10864 | Effector probability: 0.607
MHFSTAAIFTALLGSVAAAPAELVARQARINAIVVCTGDVFGDPATTISPQVCERVYGCEGGSTAVEAGNTWTSSCSSCPPDQSPNKFGGCVFSRI
>AR4307g11215 | Effector probability: 0.618
MKWHALITSFLPVALALSTGNTDSSLSTRQSANTVTDQLLFSITLPAFTARRNARDPPTLNWESDGCTSSPDNPFGFPFVPACNRHDFGYHNYRAQSRFTVSAKLRIDDNFKTDLYYQCQSSSVSGVCRALADVYYAAVRAFGGDDATPGKRSDGDLVQEYEEKVEIYNQLVQEAQEKGELPILD
>AR4307g11543 | Effector probability: 0.847
MFPVWRSLAAVHLIALLQIATAATHEYDFDIGWARANPDGEFERPVIGINGQLTSRVPAGSKFDVKYDPIDKLEKGEITELPSHKDKYAFSSKEAYQRISAVFGIWVVSGHFDVPAEASPNAKFPEIQTRKLRDVVDAWKGH
>AR4307g11546 | Effector probability: 0.803
MRLSLLSFVWLYAYLASAAITWQLQTVSNPTSDQSDAYTRIEAAMRLAVARYTRLASRPNKVITVQYVPSVATADANFNGNIRFGSNRSYMNERTALHEISHTLGIGQTQAFNDRCATNNWPSATALLRTWDGASAIINCGGGHIWPYGLNYDTEWSESNANRHCQLINAMLGDGLAG
>AR4307g11618 | Effector probability: 0.873
MLPLKSILLFCSLAAAAVLPRVNQDVPAGHCCFTLNEASTGAVVQENKVNGFLYLNGGKPNGWYCINLSNSQNILLDDFNNACFLAPDGLFQCLDPTIGPNSWTLKKSGSNTLLAHDGSTTFTSCPNKNPGQLLYGIKSGDSSQCKKITLKAKGFKGTCKSFSARSLEE
>AR4307g11753 | Effector probability: 0.567
MLVVCAIILLASVSGAFLRALTLVTDVLGTLSIVTLDNRCEKPLQKASMLDGLERSRLLKGVGIKLGNVELDRSSGRIAFAAPAGDVDIVELNESGLYE
>AR4307g12290 | Effector probability: 0.888
MLAQTFSVFLFLVFAAADLHNNCTCHNGDSYNWRMTTNACTSYNDANYKWGGAFYDTPSGRCTQQSAEEYLAGTEWEAACKETAKAGFQCADGEGTCYADPDNVRGRC
>AR4307g12316 | Effector probability: 0.792
MQIKALLFAPLLASGLVSAAPSASKSEIFEILTLRSASPIHFSNVQAARNSIFLHLPDQKAVCDKKSDNAATFKLVDGELHLYRSSGTQQKLFVDRSGMGQGVLQYSTSDALPRNAERKGWKIDKNGDLNFNGAGLLACPGSISNSWSVWVDAGNSNPGGNKNCLGFTARTVKISKPNSCKYTERK
>AR4307g12931 | Effector probability: 0.917
MKFSVAITALVSVMTASAFPVHKREIGGVLMCTGVNATGTCHYDVYELNKCHQLPEPFLLNINTFAPDGEDFSCYPRVTGCDDICRSPTGCTFGAVDFNYEHKYDLGAIKWDKLFKSFDCTAKKWPSNSTSTSTSTRRSTTTRRTAY
>AR4307g32 | Effector probability: 0.693
MHFSSIFSIFTLATAASAVSVSYDTGYDQKSRSLTTISCSDGSNGLMTKHPSWKTQGDIPKFPYIGGADAIAGWNSPSCGTCWKLEYKGKTINVLAIDHAASGFNIGLDAMNALTHGQAGKLGRVDAKATKVAAKNCGL
>AR4307g132 | Effector probability: 0.757
MQFTTVLVGFFASLALAAPAVEKRQTYVPCSGLYGTAQCCATDILGVADLDCGNPLDTPTSGDNFSAICAEIGQRARCCVLPILEQGILCQAASGVQE
>AR4307g138 | Effector probability: 0.697
MIAFVMYQFCMPLLLAVASAQDISPRAPRQFSLKTTYDSTNFFDKFNFRDAAYFNSIDPAYGGDPTNGSVNYLSKNNAISSGLAKTCNGQVYLGVDSTNKAKLRGKSKTIHGRDSLRLESKATWSSGILIADIAHMPGTACGVWPSFWSYNFDEDPVGEIDIIEGINEQSQNVVSLHTCGACSFTKIGGIDGRSNCNNGGTESEQCEDGENFDGCGNTMTEGSYGSAFNKAKGGVYATWLEANSLKIYWWSRKNIPADITAGKPDPSKWGTPASQFTGGKGCDVGKYFKGQTIILNTAFCGSNIDQDTWDGECSASTGAKTCDAYITNNPRAFKETYWLINSIKIYQ
>AR4307g155 | Effector probability: 0.965
MRFSTALLLLVPLVAAVPATDSAKALPDLSGAGQSGFDFSDDSDGLSLAAAKVCPTNYPRYCSIGGFCCRTKKCCKKQCCQNSAKYCIKGLCYK
>AR4307g454 | Effector probability: 0.792
MHFLIIFILTAALGTFANPLAPPNEPGNTHDSDLAVIDSHELFERGKGGYVGSCTDIRYYLGTQDMKVYELSETNPNFLIGKEPFMESPVLVARCPNLSGQTKCSVLRLGDCMANREGQLQPSKK
>AR4307g642 | Effector probability: 0.731
MKLPSALFVLLAVPAFVLSADLGTEVVSGSSTFYGGNLNDGMCSFVTYKLPAGIYGTAFSGSAWSTAASCGACIEVTVLGGKKIKAMIVDKCPECDKGHLDLFQDAFKAIGGTDGIVQTSYKRVTCDITSPIVLRNKEGTSQWWFSMQVMNHNEPVKSLSVSTDSGKTWQTTTRKEYNLFEKQTGFGAQQVEVRVTSSTGKIITVRNVSIAAQSETKGGSNF
>AR4307g643 | Effector probability: 0.711
MTLRKIIISSLALFLLAPPSALGSPSILANRLVDQALKVLGGEDAISAIDGVTFHSPNLMQSYETSRADTAVAISGSQNVSFSFDSEKLTQRIDRRFIPSDYWLWGSPRLDPFDFLLVVRGGEDGYACYVRGNNQIGLPTDFASRYTDSALAEYLVLHGEILSPKLLIKIKKHHRERALKVNINGIEMSAVFDPVLDITVILDTSSHLPYIIRAQEQHASESYRVLN
>AR4307g838 | Effector probability: 0.691
MRFSSALLFAGSVLAKSVSLHECLVTHSQDLAAFADCGHQGALAKCLAQLQTFAEDDVRACYTGVGCSLADADAEARFALNRCHDMASMGDLKKRFRGAEMLPRADATTTADDAKSTGDSKKTGSIYSGTDCFTTGKKSTTECPLSTSNGHVKTVTCFPTEVTTSSCASTLICTTDSANNDICMDLHHMDTGGIIVSIVFASALVIGTGLLTWACCKDRKEQKRMVAKAEATALVRAATKKQRAAQRAPLIRNASGNSSPNPFQDQNRL
>AR4307g1528 | Effector probability: 0.856
MQLSNLLSIFTLATAASAISVSYDVGYDDPNRSLTVVSCSDGANGLMTKYPTWKKQSDIPRFPYIGGAQAIAGWNSPNCGLCFKATYKGKTIYVLAIDHAENGLNVGQKAMDALTGNQATQLGRIDTSVTRVDKKFCGL
>AR4307g1664 | Effector probability: 0.96
MQISIALVAVLATFAAAAPKSYGCKPGTYACKSSGKGWQVCNTEGQWVDGGKCPPKTICKFYPPSLSPYCVPPDFEFP
>AR4307g1756 | Effector probability: 0.881
MKFSAVLTGLFATVAIAAPSADVTPNTVGVLDKRASFPIPASKGSVTYKKVQTIKGTFDGGMKTYGRGVKCTGQKEGGDADAVFILENGATLKNAIIGADQIEGVHCKGACTIENVWWKKVCEDALSIKGNGNALVKGGGATGADDKIIQHNGLGTVTIDGFTAVDFGKLYRSCGNCKVMGQRNVVVKNVKASNGKLLTGINSNKGDVATITNTCATSVKKICTEYKGTTPGNEPKEISSGPSDHCKYSTIKSC
>AR4307g1841 | Effector probability: 0.611
MVSISFKTLGGATAVLLLAQQCQCPPIAVPLFVSAALQTAAAVGSAGASFAGAIIAANVGGGKRRAVLFGRQQQFTAPAGVPQHEFDRCYNDLAQESVHINVQGPVQNNGVQVDGLPASCMNLATVLDGDAVGGPVPQPCGSACLLYDNLSAEDYEKMRTTFEGAKNA
>AR4307g2228 | Effector probability: 0.592
MRFFALAAVLLGTTSILAAPANEKRHACCCCDLSTPAIICQELDAEDCNCPAVVCPAGAPIVWDAEVKLPQAVDEPAKRADDHECCCCDPAIPATVCERRSDPEDCMCLAVVCPEDAPTLRAGDPLPTPTPTPTPTPASES
>AR4307g2468 | Effector probability: 0.822
MYFLNAARALLAAAVFQAVAAHNIVLPAHGRECFHENLHKDDTMTVTFQVGDREFGSAGNLDIDFWSGQISNPSGQYETNEKTVSNGDYSFTAKHDGKYTYCFGNENWGANTKEVSFNVHGIVYVSESDVPADPLDREVRRLSELLDQVKDEQQYIIMRERTHRNTAESTNNRVKWWNMFVIGIVIGESLFQVWWLRRFFEVKRVV
>AR4307g3079 | Effector probability: 0.821
MHLQTLLLAPLVAIGLASAVPYSKSQQKAVVIEALALRSATDIHFSSIQAANSNIFLQLHHQKAVCERKSDNAATFKLVNGELFLYREAGPHQQLYVDRSGMGQGKLGYTTGSQSAPRNAEQKGWKTENGGILSFKGNNFVACPHSIEDSWSVWVYNGIKNPGGNKGCLDFLVQTAPINSPNSCKYTHNTGAVGPDDLQPVSNEAGAKDSVPEQVPQGRIELES
>AR4307g3263 | Effector probability: 0.927
MKFIHTALLALTATAVNAACDSTLCDGATALRTIPCEDCMTGPCTLYDCGDNNIFNYICGQDKTKCQEIS
>AR4307g3280 | Effector probability: 0.829
MHFSNIILLITLSIGTASVAAQVGTANPIVSKRQECNAETWCGGFNGGCAAECRRGEHGDAAAVETSAYHEGGCNP
>AR4307g4034 | Effector probability: 0.574
MFSFKSISAALLLAASVSAVPTPTNHDSPDATVSHSRVTHSVVAGLGGLRFDPDNVVAEVGDIIEWHFLPMNHSIAQSSFGEPCEPLADGSGFFSGFNFVTAEGQADNVFQVEIIDDSKPIWYYCPQQKGSHCQNGMVGVINQNFDNQDFSLRRHKELAALTEVSVIPPYEQGGDVIVNPNPNGGF
>AR4307g4235 | Effector probability: 0.653
MFQLHHFLALLFSLHAFVGAQGACIGPDVNQATINLMESFEGFSADVYIDPTGNPTVGYGHLCTKTNCAEVPYSIPLSDADGEQLLRDDIAVAQQCITLDTTSDVVLNANQYGALVSWAFNVGCGASGSSTLIRRLNNGEDPNTVASEELPKWNKGNGEVIPGLTRRRAAEVDLFQTASNVAALPVGC
>AR4307g4237 | Effector probability: 0.558
MKLLLAVSLFAASVIAADWGQSCNDETLDSATGILTAQCNDGDGKGTFVEAELDLYHCLKYINGKISAPGGDGTFGDSCKDCTVYRLDDEIYGPLGVTRPWISCTCDGASEAATLNLDITTITNVYGDLVCRQ
>AR4307g5653 | Effector probability: 0.749
MELPAFFLGNGTIFVFLRFSASTDSIDLIDACIVVDVQDWPGVRLAAKSLAQDFARVTGNDPRQHHCGHSWVSRIIQQLESEAKLDTTKIHGKWESFNTTVVDQPFPGFGRALVIAGSDKRGAVFGCYTLSEQIGVSPRYWWADLPPRKHHEIYAISHPTLHGEPSVQYRGIFLNDEAPALTGWVL
>AR4307g5994 | Effector probability: 0.601
MRFSSNTNILTLVLAAAVSTAQRLGIPTFEFLYTVNATLGERWQIGDYGQGSRVVIPITGGSFAGPRMSGTVNNLGADWGVTDTKGVFFPDTRYNLRTDDGADIYTQTSGPTQPNNQTLLRGVFQTGHPDYEWLNYVVATGVLQRPTGEEKGKYVLIDMWQMVLPSCPGLGCQGDVHGDVHGETGKIEAPGSPWTMST
>AR4307g6168 | Effector probability: 0.844
MRILSLVNLAALASALPMALVPSDQGNAPGLSLRDAEVSAIANRSPESNNIPNSDNIIVARAIYDKNFDWPEESFAGGNLDYQFKMTSIGSGKYTVGFWNSGPKNGYSYKYTVAAAGAGNDGTSITRTLSPVSNTSVQIQKSGTYYRVTIEPV
>AR4307g6427 | Effector probability: 0.611
MKPITFLTATLAILPGALAVEQKKSVIVWFEDESTPDSAIHDAKQSILDAGGKITHIYTIIKGFSAISPEKALQQVQASGTQYDIHIEEDEEVTTY
>AR4307g6457 | Effector probability: 0.867
MFASFTAILAAASATMVSAAAIVPRGSGTASMTPHDQYSSSIGVLGCKIRTDRVAYWPGSVGCDDICVKVSHAGRKVYLLRIDQSGGAHDMSYDAWNYLGFGKSATEDPQQGGGINMEYETVHASKCAHLLQDGKLPLSASNSMNYVASCIAEPNSWVAKNYRLYNIMDPVCKWGVEEHCTLDLAVSNQPKCPSGLGATAKLNLKVSNIVYGTGKKVQAL
>AR4307g6661 | Effector probability: 0.744
MKISITVAALASFSTVAAFPLCALTCFNTVMAHPAAATCTEANMFLCMCKIKALTLAYRDCVCANCSTAATKKEAIKEGKNTCVSYAAPIAWLPDACPV
>AR4307g6940 | Effector probability: 0.766
MRINLSLLFWAAGFAAALPQKPECPQFLCVDGVNDCGIPWGGCYDTCHPETAPTPPPCPTKDDCSTRTVCVDNVNECGIWYGGTDNLQLFSGLQALAGADDATVSTKDPDTESCPCRIAMS
>AR4307g7172 | Effector probability: 0.737
MLLKALLLAIATTAAALPGRGGDLIGMYSRAFEGVDGQQYIMPYDPIFSAFRDKCDGMQILGEGRAGSLALSGFCLDDNETRYLTELNLNWCLQNNDGQLEVAAKPSSLYFDQSCSNYRLYQTGPRTDNKRMFLAAGCINNAGNFTPTFVKFDDVNETLSVKPVDGRFVCGDHQGTRVAVGDWGTLKDKYIAPQ
>AR4307g7208 | Effector probability: 0.712
MHTNTLILLLASVPGILAASGSGHSTRYWDCCKTSCAWSGKAAVSKPVTTCDKNDNPLSDPNAVSGCDNGSAFACTDNSPWAVSDDLAYGFAATAINGGSESTWCCACYKLTFTSGPVSGKTMVVQSTNTGSDISNNQFDLMIPGGGVGIFDGCSKQFGSALPGAQYGGVSSRDECNQMPTKLQAGCFWRFDWFKNADNPTFNFEQVKCPAALTARSGCVRQDDGNFPVA
>AR4307g7353 | Effector probability: 0.685
MQYNILAILTTMVAMTNAVSIYVCTSKDFSGECTDVTFPKNTCTRLPFNDAVSSIRLNNYVCSFYTDKDCGGTSFTLSADNANLREGTWNDQLTSVLC
>AR4307g7380 | Effector probability: 0.649
MLALGTQFLTLGLACLHTVLAFQSFSQGCQPMDAQFYSEDMVGFYCFPEDESLVYSYTYSMIELRHCIGNNAGTLIGYDEGNYQDSCENCSLESVRDNDYRTCYLKCTCYDTNKQAKESRLDLNVVCGGVIAGSGGFDLAPLAQTERHTARGRALAKSTSTELTAVAASLICGPATSPASATGEETRGIGKLHGGQEVGSDATRETNTGDGQVTNE
>AR4307g7438 | Effector probability: 0.782
MVFLTKLGLVAMGLVPAAMACLGYEGGVPTPTSTKTNSKVITVAAGEVFDGGWARYDRGSGACGDGEGGDADAVFLLGAGATLQNVIIGKNQMEGVHCSGPCTLRFVWFEDVCEDAITIKNDKKGEETWIIGGGAYHASDKIVQHNGCGTVNIINFYAEDYGKVYRSCGNCSSQCQRNVYVEGTTAYDGGEVVGINANYGDTATLKNVCTDADHPCVMYNGCAGGCEPSKVGYCSG
>AR4307g7506 | Effector probability: 0.822
MKALVSPLGRLGLLALSLLLLAGFVLAQDPECSASTPCKAGCCSKFGFCGYGKDCVFRFCGDKDVDRPQCDSHTLEGVVGYYEGWAARRPCNAFMPEQIPTGVYTHLNLAFATIDPDTFEVRPASSADTLLYRRVTSLKGA
>AR4307g7546 | Effector probability: 0.724
MSALFNFQSLLLVLLLLICTSAYVHHFAPGIMDRNKDGTDGPRDEFASHSACRGPQEEVPQTRGLTKPCLNDTWITSMHASEFSSSTADRDACIVCGIPPVAAVWVAHGSGRD
>AR4307g7788 | Effector probability: 0.709
MYNSLTRVQNTFGFFTTVAFVVAALIAASDLLTPRTPSASLIAPTNVQVVKGRPHYYSSKKEEYAIIKFSLDADLSSLFTWNTKQLFVYVTAQWPGSGNVTNEAVIWDSIITNPSADHLQNIGPVAMKKLKRSAEGKTIDPSRGLLKLRNQKPKYQITHPSGKIAEKDDVTLKLHYNAQPWVGLLTWNQDQDIGPWKQLVGGVSDTFSLPGLKKKDTPKKKKSN
>AR4307g7808 | Effector probability: 0.558
MIFPVAFVGLVLTRVASAAPTFVEPVAIDLNSTKWTPEHILKHDEVILYGDDGRMEVVHEAVYQQLVAANGYDLDTPDVDEDFLNKTDKADDHLDTRASCAYTRSLITDRTENFVDWDVQMSPIVIGTGKNGIDVYVSSGYSVSNSVTVSGSTELGFVKNRLSTTFGVSYSRTWTTATVVNIKGTVENGWSGVMITKPFKTRRYGRNMQGCIGSLRQTGTFMADSYKEGSSAGVKWVSGAITMCTKKQFPLTRCNGGGRFI
>AR4307g7892 | Effector probability: 0.877
MMIASTILFGLLGLTIASPVPAAAAKPKYPLEETAKGFKLSVNVTDPSRDFHPSIQNSFVTSIHTGAGLALVGVIDKGGRVFYQNGTAKEHRQGRATIITDGGTPLTPSGLKLTKDSKSKTLSSAHLDFGLGTPGVQLSSSKAYSFLLPETYLACNESLAYYQGEYFITIKQAKITKHSDGSVNRNIPKHCVPVRLVPECAELETLPKGSYSSHKYALDSQCYNDVSKIKWSKYGA
>AR4307g8287 | Effector probability: 0.584
MYASRIVSLFVAFAAAGAVSANCHDEKPTLHCYNGPDDNPQDLTVEDITYVGNYLRAYGREVEGGRYFTMTAKHAPDCAEWVLFTHGSVIALAKHIDPKKDSSVLFEDIANTIDGGQQRDEVGPALIQCLADGGSAGVIFNGSNSAYEGEEYRDNGYSPEGILIKLVNASPDEL
>AR4307g8309 | Effector probability: 0.567
MFIKHFTVNVLLALTSVTAIPNPLSDEFGVEARDKDAPNLAARGSYNYGYHDCGNDATWDEKKQKCGCKNYGQDYSDSTKSCSCSEGQNWNSVSKTCDYDCGEYASWDSGQKGCKCKKDGQSYDNEKKSCDCPYGKEWNGYSCDNKGTEKCYGESSWNDEKKACYCNKEGQSYDSGKKGCYCPYGQTWNGYSCDNKGTEKCYGESSWNDEKKSCWCNKEGQVYDSGKKDCYCPDGKEWNGYSCDNKEKCYGESSWNDEKKSCWCNKEGQVYDSGKKGCYCPYGKEWNGNSCGDKCGDYASWNDDKKSCWCKKEGQVYDNDKKSCGCPDGKEWTGYGCEEKCYGESSWNKDKKSCWCKKEGQVYDSVKKGCYCSDGQTWGNYGCQYDCGDYASWNKDKKS…
>AR4307g8333 | Effector probability: 0.919
MKFSATIMGLALLATGTSAQKAVVKNNCKATVYVQSVPIDGSAKGPLTTLTTGKTFTEDLRKSGSTVKIAITKTLNDPLFFGYSFSKTDDYAYYELNSEWGNPFAKSHNILTPGEGCEKFDCPSGKADCYSTPAHKKVYGCPQPVDLKATLCA

## Sheet: CBS 119158
Supplementary Table 6. Predicted secretome for the Nectriaceous fungi studied
Name isolate	Target protein	Accession	Annotation	E-value	Score	Bias
Neonectria coccinea CBS 119158	Prot_3194	PF02826.14	2-Hacid_dh_c	0.0016	12.7	0
Neonectria coccinea CBS 119158	Prot_3194	PF02737.13	3HCDH_N	0.00044	15	0.1
Neonectria coccinea CBS 119158	Prot_9436	PF02737.13	3HCDH_N	0.00079	14.2	0
Neonectria coccinea CBS 119158	Prot_6772	PF01835.14	Alpha-2-macroglobulin	0.0063	11.9	0
Neonectria coccinea CBS 119158	Prot_306	PF12730.2	ABC-2 family transporter	0.0077	10.5	0
Neonectria coccinea CBS 119158	Prot_4549	PF00561.15	Abhydrolase_1	1.7e-19	65.4	0
Neonectria coccinea CBS 119158	Prot_9248	PF00561.15	Abhydrolase_1	1e-08	30.1	0
Neonectria coccinea CBS 119158	Prot_9062	PF00561.15	Abhydrolase_1	5.7e-07	24.4	0
Neonectria coccinea CBS 119158	Prot_12164	PF00561.15	Abhydrolase_1	2e-05	19.4	0.1
Neonectria coccinea CBS 119158	Prot_6565	PF00561.15	Abhydrolase_1	0.00093	13.9	0
Neonectria coccinea CBS 119158	Prot_3235	PF00561.15	Abhydrolase_1	8.1e-05	17.4	0
Neonectria coccinea CBS 119158	Prot_1497	PF00561.15	Abhydrolase_1	0.0035	12	0.3
Neonectria coccinea CBS 119158	Prot_11025	PF00561.15	Abhydrolase_1	0.00093	13.9	0
Neonectria coccinea CBS 119158	Prot_1844	PF00561.15	Abhydrolase_1	0.0004	15.1	0.1
Neonectria coccinea CBS 119158	Prot_9089	PF00561.15	Abhydrolase_1	0.003	12.2	0
Neonectria coccinea CBS 119158	Prot_11025	PF02230.11	Abhydrolase_2	9.9e-05	16.9	0
Neonectria coccinea CBS 119158	Prot_9248	PF02230.11	Abhydrolase_2	0.011	10.3	0.1
Neonectria coccinea CBS 119158	Prot_1952	PF07859.8	Abhydrolase_3	2.7e-12	41.8	0
Neonectria coccinea CBS 119158	Prot_6761	PF07859.8	Abhydrolase_3	4.7e-10	34.5	0.1
Neonectria coccinea CBS 119158	Prot_389	PF07859.8	Abhydrolase_3	2.7e-09	32	0.1
Neonectria coccinea CBS 119158	Prot_5947	PF07859.8	Abhydrolase_3	9.9e-08	26.9	0.3
Neonectria coccinea CBS 119158	Prot_9248	PF07859.8	Abhydrolase_3	1.4e-06	23.1	0.5
Neonectria coccinea CBS 119158	Prot_8062	PF07859.8	Abhydrolase_3	6.8e-06	20.9	0.2
Neonectria coccinea CBS 119158	Prot_5455	PF07859.8	Abhydrolase_3	0.00072	14.3	0.2
Neonectria coccinea CBS 119158	Prot_6565	PF07859.8	Abhydrolase_3	0.0018	12.9	0
Neonectria coccinea CBS 119158	Prot_4549	PF07859.8	Abhydrolase_3	0.0028	12.3	0
Neonectria coccinea CBS 119158	Prot_914	PF12695.2	Abhydrolase_5	5.1e-17	57.1	0
Neonectria coccinea CBS 119158	Prot_6632	PF12695.2	Abhydrolase_5	3.5e-16	54.4	0
Neonectria coccinea CBS 119158	Prot_4549	PF12695.2	Abhydrolase_5	5.3e-14	47.3	0.1
Neonectria coccinea CBS 119158	Prot_9248	PF12695.2	Abhydrolase_5	3.4e-14	47.9	0.3
Neonectria coccinea CBS 119158	Prot_1497	PF12695.2	Abhydrolase_5	7.9e-12	40.3	0.1
Neonectria coccinea CBS 119158	Prot_3235	PF12695.2	Abhydrolase_5	2.9e-11	38.4	0
Neonectria coccinea CBS 119158	Prot_6565	PF12695.2	Abhydrolase_5	3.8e-11	38	0
Neonectria coccinea CBS 119158	Prot_12164	PF12695.2	Abhydrolase_5	1e-10	36.7	1.8
Neonectria coccinea CBS 119158	Prot_6718	PF12695.2	Abhydrolase_5	2.3e-05	19.3	0
Neonectria coccinea CBS 119158	Prot_6528	PF12695.2	Abhydrolase_5	0.00026	15.9	0
Neonectria coccinea CBS 119158	Prot_7387	PF12695.2	Abhydrolase_5	0.0023	12.8	0
Neonectria coccinea CBS 119158	Prot_389	PF12695.2	Abhydrolase_5	0.0034	12.3	0.1
Neonectria coccinea CBS 119158	Prot_1952	PF12695.2	Abhydrolase_5	0.0084	11	0
Neonectria coccinea CBS 119158	Prot_1844	PF12695.2	Abhydrolase_5	0.0043	11.9	2.7
Neonectria coccinea CBS 119158	Prot_4549	PF12697.2	Abhydrolase_6	7.6e-35	115.9	0
Neonectria coccinea CBS 119158	Prot_3235	PF12697.2	Abhydrolase_6	1.3e-30	102.1	0
Neonectria coccinea CBS 119158	Prot_12164	PF12697.2	Abhydrolase_6	2.1e-17	58.8	0.6
Neonectria coccinea CBS 119158	Prot_1497	PF12697.2	Abhydrolase_6	1.1e-15	53.3	0.2
Neonectria coccinea CBS 119158	Prot_9248	PF12697.2	Abhydrolase_6	2.4e-13	45.6	1.1
Neonectria coccinea CBS 119158	Prot_9062	PF12697.2	Abhydrolase_6	1.7e-12	42.8	0
Neonectria coccinea CBS 119158	Prot_6565	PF12697.2	Abhydrolase_6	1.4e-12	43	0.2
Neonectria coccinea CBS 119158	Prot_914	PF12697.2	Abhydrolase_6	1.1e-05	20.5	0
Neonectria coccinea CBS 119158	Prot_6632	PF12697.2	Abhydrolase_6	3.8e-07	25.3	0.1
Neonectria coccinea CBS 119158	Prot_11025	PF12697.2	Abhydrolase_6	6e-05	18.1	0.1
Neonectria coccinea CBS 119158	Prot_6528	PF12697.2	Abhydrolase_6	0.00085	14.3	0
Neonectria coccinea CBS 119158	Prot_5908	PF12697.2	Abhydrolase_6	0.085	7.8	0.1
Neonectria coccinea CBS 119158	Prot_6718	PF12697.2	Abhydrolase_6	0.0029	12.6	0
Neonectria coccinea CBS 119158	Prot_1844	PF12697.2	Abhydrolase_6	0.00098	14.1	0.1
Neonectria coccinea CBS 119158	Prot_12164	PF06259.7	Abhydrolase_8	1.2e-05	20	0.4
Neonectria coccinea CBS 119158	Prot_11025	PF10081.4	Abhydrolase_9	1.6e-06	22.1	0
Neonectria coccinea CBS 119158	Prot_11530	PF08882.6	Acetone-carb-G	0.006	11.7	0
Neonectria coccinea CBS 119158	Prot_2652	PF00694.14	Aconitase_C	0.00074	14.7	0.1
Neonectria coccinea CBS 119158	Prot_4126	PF12806.2	Acyl-CoA_dh_C	0.018	10	0.2
Neonectria coccinea CBS 119158	Prot_8313	PF02439.10	Adeno_E3_CR2	0.0042	11.8	0
Neonectria coccinea CBS 119158	Prot_8608	PF02439.10	Adeno_E3_CR2	0.016	9.9	1.9
Neonectria coccinea CBS 119158	Prot_2541	PF03678.9	Adeno_hexon_C	0.0017	12.9	0.1
Neonectria coccinea CBS 119158	Prot_8956	PF00106.20	adh_short	2.6e-29	97.4	0.2
Neonectria coccinea CBS 119158	Prot_2143	PF00106.20	adh_short	6.7e-25	83	0.1
Neonectria coccinea CBS 119158	Prot_8956	PF13561.1	adh_short_C2	4.9e-26	87	0
Neonectria coccinea CBS 119158	Prot_2143	PF13561.1	adh_short_C2	1.2e-08	30.1	0
Neonectria coccinea CBS 119158	Prot_1321	PF05110.8	AF-4	1.4	1.7	13.3
Neonectria coccinea CBS 119158	Prot_12492	PF00578.16	AhpC-TSA	5.5e-05	18	0
Neonectria coccinea CBS 119158	Prot_2051	PF00586.19	AIRS	0.0053	12.1	0
Neonectria coccinea CBS 119158	Prot_1579	PF01262.16	AlaDh_PNT_C	0.00059	14.6	0.2
Neonectria coccinea CBS 119158	Prot_4804	PF01263.15	Aldose_epim	3.5e-50	165.9	0.1
Neonectria coccinea CBS 119158	Prot_4115	PF05426.7	Alginate_lyase	1.9e-14	48.8	5.8
Neonectria coccinea CBS 119158	Prot_4064	PF05426.7	Alginate_lyase	7.7e-13	43.5	5.4
Neonectria coccinea CBS 119158	Prot_12863	PF00245.15	Alk_phosphatase	7.6e-70	230.7	0.1
Neonectria coccinea CBS 119158	Prot_2652	PF00128.19	Alpha_amylase	2.2e-64	212.9	0.2
Neonectria coccinea CBS 119158	Prot_9329	PF00128.19	Alpha_amylase	7.5e-65	214.4	2.3
Neonectria coccinea CBS 119158	Prot_2279	PF10369.4	Alpha-L-AF_C	0.074	8	0.6
Neonectria coccinea CBS 119158	Prot_8723	PF01425.16	Amidase	1.2e-44	147.9	0.1
Neonectria coccinea CBS 119158	Prot_7659	PF01425.16	Amidase	3.3e-30	100.4	0
Neonectria coccinea CBS 119158	Prot_4099	PF04909.9	Amidohydro_2	1.6e-27	91.9	0.1
Neonectria coccinea CBS 119158	Prot_2404	PF07969.6	Amidohydro_3	1.4e-55	184.2	5.1
Neonectria coccinea CBS 119158	Prot_2404	PF13594.1	Urease_alpha	1.6e-05	19.8	0
Neonectria coccinea CBS 119158	Prot_8515	PF01593.19	Amino_oxidase	3.6e-28	93.9	0.1
Neonectria coccinea CBS 119158	Prot_1288	PF01593.19	Amino_oxidase	3.3e-08	28.1	0
Neonectria coccinea CBS 119158	Prot_1579	PF01593.19	Amino_oxidase	2.8e-06	21.7	0
Neonectria coccinea CBS 119158	Prot_591	PF01593.19	Amino_oxidase	1.1e-05	19.8	0
Neonectria coccinea CBS 119158	Prot_12598	PF03782.12	AMOP	1.5	4	13.2
Neonectria coccinea CBS 119158	Prot_5319	PF00501.23	AMP-binding	2.7e-74	245.1	0
Neonectria coccinea CBS 119158	Prot_5319	PF13193.1	AMP-binding_C	4.4e-12	41.9	0
Neonectria coccinea CBS 119158	Prot_12568	PF00023.25	Ank	0.00021	16.2	0
Neonectria coccinea CBS 119158	Prot_12568	PF12796.2	Ank_2	1.1e-14	49.7	0
Neonectria coccinea CBS 119158	Prot_12568	PF13606.1	Ank_3	0.00029	16.1	0
Neonectria coccinea CBS 119158	Prot_12568	PF13637.1	Ank_4	4.1e-07	25.5	0
Neonectria coccinea CBS 119158	Prot_12568	PF13857.1	Ank_5	0.00018	16.8	0
Neonectria coccinea CBS 119158	Prot_10336	PF08105.6	Antimicrobial10	0.011	10.5	0.4
Neonectria coccinea CBS 119158	Prot_1589	PF02558.11	ApbA	0.00094	13.7	0
Neonectria coccinea CBS 119158	Prot_3194	PF02558.11	ApbA	0.0022	12.6	0.3
Neonectria coccinea CBS 119158	Prot_12163	PF02558.11	ApbA	0.0055	11.3	0.7
Neonectria coccinea CBS 119158	Prot_1288	PF02558.11	ApbA	0.0059	11.2	0.1
Neonectria coccinea CBS 119158	Prot_7690	PF02558.11	ApbA	0.0072	10.9	0.2
Neonectria coccinea CBS 119158	Prot_9349	PF00491.16	Arginase	2.8e-90	297.4	0
Neonectria coccinea CBS 119158	Prot_1882	PF01731.15	Arylesterase	9.3e-08	27.1	0.2
Neonectria coccinea CBS 119158	Prot_10552	PF05935.6	Arylsulfotrans	2e-15	51.4	0
Neonectria coccinea CBS 119158	Prot_6611	PF05935.6	Arylsulfotrans	1.1e-12	42.3	0
Neonectria coccinea CBS 119158	Prot_6611	PF14269.1	Arylsulfotran_2	2.3e-60	199.4	0
Neonectria coccinea CBS 119158	Prot_10552	PF14269.1	Arylsulfotran_2	7.8e-56	184.5	0.3
Neonectria coccinea CBS 119158	Prot_2252	PF00026.18	Asp	1.9e-65	216.3	5.5
Neonectria coccinea CBS 119158	Prot_2050	PF00026.18	Asp	6e-65	214.6	8.4
Neonectria coccinea CBS 119158	Prot_954	PF00026.18	Asp	4.4e-64	211.8	4.7
Neonectria coccinea CBS 119158	Prot_6753	PF00026.18	Asp	1.4e-53	177.2	0.1
Neonectria coccinea CBS 119158	Prot_3040	PF00026.18	Asp	1.2e-51	170.9	0
Neonectria coccinea CBS 119158	Prot_3875	PF00026.18	Asp	4.3e-15	50.8	0
Neonectria coccinea CBS 119158	Prot_11590	PF00026.18	Asp	2.5e-06	22	0
Neonectria coccinea CBS 119158	Prot_8608	PF00026.18	Asp	0.0057	11	0
Neonectria coccinea CBS 119158	Prot_10774	PF01112.13	Asparaginase_2	9.2e-88	289.1	1.9
Neonectria coccinea CBS 119158	Prot_9855	PF14521.1	Aspzincin_M35	2.9e-08	29.5	0.7
Neonectria coccinea CBS 119158	Prot_2050	PF13650.1	Asp_protease_2	7.2e-06	21.6	0.1
Neonectria coccinea CBS 119158	Prot_3040	PF13650.1	Asp_protease_2	0.13	8	0
Neonectria coccinea CBS 119158	Prot_2252	PF13650.1	Asp_protease_2	0.0052	12.4	0
Neonectria coccinea CBS 119158	Prot_954	PF13650.1	Asp_protease_2	0.17	7.6	0.2
Neonectria coccinea CBS 119158	Prot_10629	PF01400.19	Astacin	0.00055	14.5	0.3
Neonectria coccinea CBS 119158	Prot_11030	PF09451.5	ATG27	4.9e-43	142.3	1.8
Neonectria coccinea CBS 119158	Prot_10061	PF09451.5	ATG27	1.1e-05	19.9	0
Neonectria coccinea CBS 119158	Prot_7944	PF02038.11	ATP1_PLM_MAT8	1.2	3.3	7.9
Neonectria coccinea CBS 119158	Prot_9331	PF03154.10	Atrophin-1	2.7	1	16.6
Neonectria coccinea CBS 119158	Prot_306	PF11725.3	AvrE_T3Es	2	0.3	26
Neonectria coccinea CBS 119158	Prot_1497	PF05448.7	AXE1	0.0096	9.5	0
Neonectria coccinea CBS 119158	Prot_6565	PF05448.7	AXE1	0.0027	11.3	0
Neonectria coccinea CBS 119158	Prot_1570	PF02310.14	B12-binding	0.00089	14.3	0.1
Neonectria coccinea CBS 119158	Prot_1497	PF08840.6	BAAT_C	4.2e-06	21.7	0
Neonectria coccinea CBS 119158	Prot_5899	PF05968.6	Bacillus_PapR	0.00011	17.3	0.1
Neonectria coccinea CBS 119158	Prot_5519	PF04513.7	Baculo_PEP_C	0.0019	13.1	9.4
Neonectria coccinea CBS 119158	Prot_3021	PF04684.8	BAF1_ABF1	0.074	6.9	7.9
Neonectria coccinea CBS 119158	Prot_5541	PF00967.12	Barwin	4.9e-06	21.3	0.4
Neonectria coccinea CBS 119158	Prot_4294	PF00967.12	Barwin	0.0018	13.1	0
Neonectria coccinea CBS 119158	Prot_2517	PF08031.7	BBE	2.4e-16	54.5	0
Neonectria coccinea CBS 119158	Prot_9985	PF08031.7	BBE	6.7e-16	53.1	0.1
Neonectria coccinea CBS 119158	Prot_4293	PF08031.7	BBE	7.2e-15	49.8	0
Neonectria coccinea CBS 119158	Prot_3669	PF08031.7	BBE	1.1e-09	33.2	0.1
Neonectria coccinea CBS 119158	Prot_5147	PF08031.7	BBE	4.1e-08	28.2	0
Neonectria coccinea CBS 119158	Prot_1717	PF08031.7	BBE	9.7e-06	20.6	0.3
Neonectria coccinea CBS 119158	Prot_3993	PF08031.7	BBE	9.7e-06	20.6	0.1
Neonectria coccinea CBS 119158	Prot_5515	PF08031.7	BBE	4.4e-05	18.5	0.1
Neonectria coccinea CBS 119158	Prot_11249	PF08031.7	BBE	0.0099	10.9	0.1
Neonectria coccinea CBS 119158	Prot_8098	PF00144.19	Beta-lactamase	7.1e-37	122.2	0.4
Neonectria coccinea CBS 119158	Prot_9049	PF00144.19	Beta-lactamase	2.4e-07	25.1	0
Neonectria coccinea CBS 119158	Prot_5167	PF13229.1	Beta_helix	1.8e-10	35.9	1.9
Neonectria coccinea CBS 119158	Prot_1593	PF13229.1	Beta_helix	4.9e-08	28	13
Neonectria coccinea CBS 119158	Prot_2504	PF13229.1	Beta_helix	3.3e-08	28.6	16.6
Neonectria coccinea CBS 119158	Prot_1726	PF13229.1	Beta_helix	1.5e-06	23.2	6.3
Neonectria coccinea CBS 119158	Prot_11667	PF13229.1	Beta_helix	0.0025	12.7	33.9
Neonectria coccinea CBS 119158	Prot_6686	PF13229.1	Beta_helix	0.0017	13.2	8.4
Neonectria coccinea CBS 119158	Prot_2642	PF13229.1	Beta_helix	0.004	12	5.5
Neonectria coccinea CBS 119158	Prot_12259	PF13229.1	Beta_helix	0.0013	13.6	2.8
Neonectria coccinea CBS 119158	Prot_7023	PF13229.1	Beta_helix	0.0062	11.4	2.7
Neonectria coccinea CBS 119158	Prot_10310	PF07523.7	Big_3	0.098	7.9	0.6
Neonectria coccinea CBS 119158	Prot_7980	PF15185.1	BMF	0.013	9.9	1.5
Neonectria coccinea CBS 119158	Prot_1163	PF02012.15	BNR	0.0037	12.3	0.2
Neonectria coccinea CBS 119158	Prot_4343	PF02012.15	BNR	0.0028	12.6	0.3
Neonectria coccinea CBS 119158	Prot_5541	PF02012.15	BNR	0.00059	14.7	0.9
Neonectria coccinea CBS 119158	Prot_1163	PF13088.1	BNR_2	4.3e-05	18	0
Neonectria coccinea CBS 119158	Prot_4343	PF13088.1	BNR_2	2.7e-07	25.2	0
Neonectria coccinea CBS 119158	Prot_5743	PF09073.5	BUD22	0.23	5.5	29.2
Neonectria coccinea CBS 119158	Prot_9505	PF09073.5	BUD22	5.8	0.9	19.5
Neonectria coccinea CBS 119158	Prot_5562	PF09073.5	BUD22	7.8	0.5	23.2
Neonectria coccinea CBS 119158	Prot_8484	PF09792.4	But2	0.00026	15.9	0.1
Neonectria coccinea CBS 119158	Prot_8604	PF07654.10	C1-set	0.0019	13.3	0.2
Neonectria coccinea CBS 119158	Prot_6982	PF00386.16	C1q	0.64	5.2	0
Neonectria coccinea CBS 119158	Prot_3741	PF00188.21	CAP	5.3e-11	38.2	0.1
Neonectria coccinea CBS 119158	Prot_5995	PF13620.1	CarboxypepD_reg	0.0016	13.6	0
Neonectria coccinea CBS 119158	Prot_9331	PF13620.1	CarboxypepD_reg	0.00084	14.5	1.1
Neonectria coccinea CBS 119158	Prot_4545	PF13620.1	CarboxypepD_reg	0.012	10.9	2.2
Neonectria coccinea CBS 119158	Prot_6279	PF00199.14	Catalase	2.5e-160	528.4	1
Neonectria coccinea CBS 119158	Prot_6279	PF06628.7	Catalase-rel	1.3e-21	71.4	0.1
Neonectria coccinea CBS 119158	Prot_4545	PF14683.1	CBM-like	9.2e-58	189.7	0
Neonectria coccinea CBS 119158	Prot_9331	PF14683.1	CBM-like	1.7e-47	156.2	0.5
Neonectria coccinea CBS 119158	Prot_5995	PF14683.1	CBM-like	2.2e-13	45.3	0
Neonectria coccinea CBS 119158	Prot_9923	PF00734.13	CBM_1	2.1e-14	48.1	12.9
Neonectria coccinea CBS 119158	Prot_10757	PF00734.13	CBM_1	2.3e-13	44.7	7.5
Neonectria coccinea CBS 119158	Prot_2694	PF00734.13	CBM_1	9.5e-14	45.9	13.6
Neonectria coccinea CBS 119158	Prot_9201	PF00734.13	CBM_1	3.6e-13	44.1	9.3
Neonectria coccinea CBS 119158	Prot_1726	PF00734.13	CBM_1	2.3e-12	41.5	10
Neonectria coccinea CBS 119158	Prot_7685	PF00734.13	CBM_1	1.2e-12	42.5	11
Neonectria coccinea CBS 119158	Prot_8436	PF00734.13	CBM_1	3e-12	41.2	5.1
Neonectria coccinea CBS 119158	Prot_9769	PF02018.12	CBM_4_9	0.00073	14.7	0
Neonectria coccinea CBS 119158	Prot_8884	PF02018.12	CBM_4_9	0.00084	14.5	0.1
Neonectria coccinea CBS 119158	Prot_1579	PF15625.1	CC2D2AN-C2	0.014	10	0
Neonectria coccinea CBS 119158	Prot_6823	PF04995.9	CcmD	3.6e-05	18.6	0.7
Neonectria coccinea CBS 119158	Prot_9461	PF14984.1	CD24	0.0036	12.2	6.7
Neonectria coccinea CBS 119158	Prot_6823	PF09507.5	CDC27	0.84	3.8	22.8
Neonectria coccinea CBS 119158	Prot_11030	PF02724.9	CDC45	0.038	7.1	9.9
Neonectria coccinea CBS 119158	Prot_353	PF02724.9	CDC45	0.5	3.3	10.7
Neonectria coccinea CBS 119158	Prot_10550	PF02724.9	CDC45	0.85	2.6	8
Neonectria coccinea CBS 119158	Prot_10447	PF00150.13	Cellulase	5.4e-56	184.9	1
Neonectria coccinea CBS 119158	Prot_7685	PF00150.13	Cellulase	5.7e-55	181.6	4.2
Neonectria coccinea CBS 119158	Prot_11659	PF00150.13	Cellulase	1.1e-21	72.4	5
Neonectria coccinea CBS 119158	Prot_633	PF00150.13	Cellulase	3.1e-21	70.9	3.2
Neonectria coccinea CBS 119158	Prot_10885	PF00150.13	Cellulase	6.2e-05	17.4	0.5
Neonectria coccinea CBS 119158	Prot_1309	PF00150.13	Cellulase	2e-05	19	0.6
Neonectria coccinea CBS 119158	Prot_407	PF00150.13	Cellulase	0.00025	15.4	0.6
Neonectria coccinea CBS 119158	Prot_2652	PF00150.13	Cellulase	0.0023	12.2	0
Neonectria coccinea CBS 119158	Prot_633	PF12876.2	Cellulase-like	7.1e-08	28	0
Neonectria coccinea CBS 119158	Prot_8126	PF09026.5	CENP-B_dimeris	0.0012	14.2	0.7
Neonectria coccinea CBS 119158	Prot_8982	PF15511.1	CENp-T_C	0.82	3.9	19.1
Neonectria coccinea CBS 119158	Prot_4837	PF07249.7	Cerato-platanin	6.6e-56	182.6	0.4
Neonectria coccinea CBS 119158	Prot_1574	PF07249.7	Cerato-platanin	5e-55	179.7	0.7
Neonectria coccinea CBS 119158	Prot_3230	PF07249.7	Cerato-platanin	1.9e-22	74.7	0
Neonectria coccinea CBS 119158	Prot_4323	PF07249.7	Cerato-platanin	3.1e-05	19.1	0.1
Neonectria coccinea CBS 119158	Prot_6998	PF05730.6	CFEM	1.2e-14	49.1	5.5
Neonectria coccinea CBS 119158	Prot_1570	PF05730.6	CFEM	1.5e-12	42.3	10.4
Neonectria coccinea CBS 119158	Prot_12598	PF05730.6	CFEM	5.2e-12	40.6	11.4
Neonectria coccinea CBS 119158	Prot_9723	PF05730.6	CFEM	1.4e-10	36	5.4
Neonectria coccinea CBS 119158	Prot_7543	PF05730.6	CFEM	8.4e-10	33.5	9.7
Neonectria coccinea CBS 119158	Prot_5699	PF05730.6	CFEM	1.2e-07	26.6	7.4
Neonectria coccinea CBS 119158	Prot_6823	PF05730.6	CFEM	1e-06	23.6	8.9
Neonectria coccinea CBS 119158	Prot_9770	PF05730.6	CFEM	5.9e-07	24.4	10.3
Neonectria coccinea CBS 119158	Prot_2382	PF05730.6	CFEM	0.012	10.6	9.8
Neonectria coccinea CBS 119158	Prot_2641	PF00187.14	Chitin_bind_1	6.7e-10	34	5.8
Neonectria coccinea CBS 119158	Prot_5460	PF00187.14	Chitin_bind_1	1.8e-08	29.4	4.5
Neonectria coccinea CBS 119158	Prot_7980	PF00187.14	Chitin_bind_1	4.7e-06	21.7	19.4
Neonectria coccinea CBS 119158	Prot_10630	PF00187.14	Chitin_bind_1	5e-08	28	8.2
Neonectria coccinea CBS 119158	Prot_1792	PF00187.14	Chitin_bind_1	5.9e-07	24.5	22.7
Neonectria coccinea CBS 119158	Prot_1687	PF00187.14	Chitin_bind_1	3.5e-07	25.3	4.8
Neonectria coccinea CBS 119158	Prot_80	PF00187.14	Chitin_bind_1	0.056	8.6	13.3
Neonectria coccinea CBS 119158	Prot_5743	PF00187.14	Chitin_bind_1	0.071	8.3	11.4
Neonectria coccinea CBS 119158	Prot_10550	PF03067.10	LPMO_10	1.9e-14	49.5	0.3
Neonectria coccinea CBS 119158	Prot_4549	PF12740.2	Chlorophyllase2	0.001	13.1	0
Neonectria coccinea CBS 119158	Prot_914	PF12740.2	Chlorophyllase2	0.0029	11.6	0
Neonectria coccinea CBS 119158	Prot_6632	PF12740.2	Chlorophyllase2	0.0016	12.4	0
Neonectria coccinea CBS 119158	Prot_1593	PF14592.1	Chondroitinas_B	1.7e-06	22.2	0
Neonectria coccinea CBS 119158	Prot_5167	PF14592.1	Chondroitinas_B	1.9e-06	22	0
Neonectria coccinea CBS 119158	Prot_1882	PF00385.19	Chromo	1.9e-13	45	0.2
Neonectria coccinea CBS 119158	Prot_7168	PF08547.7	CIA30	0.0093	10.9	0
Neonectria coccinea CBS 119158	Prot_11030	PF00878.13	CIMR	0.0004	15.3	0
Neonectria coccinea CBS 119158	Prot_7944	PF13903.1	Claudin_2	0.019	9.7	0.1
Neonectria coccinea CBS 119158	Prot_7944	PF12467.3	CMV_1a	0.34	6.4	2.5
Neonectria coccinea CBS 119158	Prot_2143	PF13380.1	CoA_binding_2	0.0094	11.2	0
Neonectria coccinea CBS 119158	Prot_353	PF06213.7	CobT	0.25	5.5	15.8
Neonectria coccinea CBS 119158	Prot_11030	PF06213.7	CobT	1.4	3	15.2
Neonectria coccinea CBS 119158	Prot_5947	PF00135.23	Coesterase	7.5e-99	326.9	0
Neonectria coccinea CBS 119158	Prot_389	PF00135.23	Coesterase	3.4e-84	278.5	0.1
Neonectria coccinea CBS 119158	Prot_8062	PF00135.23	Coesterase	7.5e-92	303.8	0
Neonectria coccinea CBS 119158	Prot_1952	PF00135.23	Coesterase	8.1e-83	274	0.4
Neonectria coccinea CBS 119158	Prot_5455	PF00135.23	Coesterase	4.3e-91	301.3	0
Neonectria coccinea CBS 119158	Prot_6761	PF00135.23	Coesterase	7.1e-90	297.3	0
Neonectria coccinea CBS 119158	Prot_3815	PF00135.23	Coesterase	1.7e-66	220.1	0.2
Neonectria coccinea CBS 119158	Prot_2672	PF07143.6	CrtC	2.1e-05	19.1	0.7
Neonectria coccinea CBS 119158	Prot_4089	PF00030.14	Crystall	1.5e-05	19.9	0
Neonectria coccinea CBS 119158	Prot_4089	PF08964.5	Crystall_3	6.4e-05	17.8	0
Neonectria coccinea CBS 119158	Prot_6982	PF00394.17	Cu-oxidase	7.6e-36	118.5	0.1
Neonectria coccinea CBS 119158	Prot_9752	PF00394.17	Cu-oxidase	1.2e-33	111.4	0
Neonectria coccinea CBS 119158	Prot_6707	PF00394.17	Cu-oxidase	2.5e-33	110.3	0.1
Neonectria coccinea CBS 119158	Prot_3790	PF00394.17	Cu-oxidase	4.4e-31	103	0
Neonectria coccinea CBS 119158	Prot_3810	PF00394.17	Cu-oxidase	6.9e-29	95.9	0
Neonectria coccinea CBS 119158	Prot_10744	PF00394.17	Cu-oxidase	4.9e-11	37.9	0.1
Neonectria coccinea CBS 119158	Prot_9752	PF07731.9	Cu-oxidase_2	1.3e-41	136.4	0
Neonectria coccinea CBS 119158	Prot_3790	PF07731.9	Cu-oxidase_2	8.9e-38	124	0.3
Neonectria coccinea CBS 119158	Prot_3810	PF07731.9	Cu-oxidase_2	7.6e-38	124.3	0
Neonectria coccinea CBS 119158	Prot_6707	PF07731.9	Cu-oxidase_2	1.9e-38	126.2	0.7
Neonectria coccinea CBS 119158	Prot_6982	PF07731.9	Cu-oxidase_2	1.7e-37	123.1	0.5
Neonectria coccinea CBS 119158	Prot_10744	PF07731.9	Cu-oxidase_2	7.7e-27	88.6	1.9
Neonectria coccinea CBS 119158	Prot_7643	PF07731.9	Cu-oxidase_2	0.0046	11.6	0.3
Neonectria coccinea CBS 119158	Prot_6982	PF07732.10	Cu-oxidase_3	1.3e-43	142.6	0.9
Neonectria coccinea CBS 119158	Prot_3810	PF07732.10	Cu-oxidase_3	3.3e-42	138.1	1.7
Neonectria coccinea CBS 119158	Prot_10744	PF07732.10	Cu-oxidase_3	2.3e-44	145	1.1
Neonectria coccinea CBS 119158	Prot_6707	PF07732.10	Cu-oxidase_3	1.3e-39	129.7	1.2
Neonectria coccinea CBS 119158	Prot_9752	PF07732.10	Cu-oxidase_3	9.3e-27	88.2	0.1
Neonectria coccinea CBS 119158	Prot_3790	PF07732.10	Cu-oxidase_3	0.0014	13.4	0
Neonectria coccinea CBS 119158	Prot_2688	PF06172.6	Cupin_5	3.9e-37	122.4	0
Neonectria coccinea CBS 119158	Prot_8126	PF13473.1	Cupredoxin1	0.0012	13.9	0
Neonectria coccinea CBS 119158	Prot_7643	PF13473.1	Cupredoxin1	0.0024	12.9	0
Neonectria coccinea CBS 119158	Prot_9752	PF13473.1	Cupredoxin1	0.026	9.6	0
Neonectria coccinea CBS 119158	Prot_11025	PF01083.17	Cutinase	4.7e-54	177.9	5.1
Neonectria coccinea CBS 119158	Prot_1844	PF01083.17	Cutinase	6.8e-53	174.1	10.7
Neonectria coccinea CBS 119158	Prot_9089	PF01083.17	Cutinase	3.2e-48	158.9	0.9
Neonectria coccinea CBS 119158	Prot_6528	PF01083.17	Cutinase	2.8e-44	146.1	0.1
Neonectria coccinea CBS 119158	Prot_12795	PF01083.17	Cutinase	1.4e-41	137.2	0
Neonectria coccinea CBS 119158	Prot_9331	PF01083.17	Cutinase	3.7e-18	61	0.1
Neonectria coccinea CBS 119158	Prot_9248	PF01083.17	Cutinase	0.0019	13.1	0
Neonectria coccinea CBS 119158	Prot_9460	PF02298.12	Cu_bind_like	3.2e-06	22	0.4
Neonectria coccinea CBS 119158	Prot_7643	PF02298.12	Cu_bind_like	0.00011	17.1	0.4
Neonectria coccinea CBS 119158	Prot_1321	PF02298.12	Cu_bind_like	0.015	10.2	0.7
Neonectria coccinea CBS 119158	Prot_7545	PF08881.5	CVNH	6e-11	37.6	0
Neonectria coccinea CBS 119158	Prot_8123	PF08881.5	CVNH	7.3e-05	18.1	0.1
Neonectria coccinea CBS 119158	Prot_2406	PF08881.5	CVNH	1.3e-05	20.5	0
Neonectria coccinea CBS 119158	Prot_8126	PF04889.7	Cwf_Cwc_15	0.032	9	4.1
Neonectria coccinea CBS 119158	Prot_6326	PF12734.2	CYSTM	0.038	9.3	2.4
Neonectria coccinea CBS 119158	Prot_7690	PF08802.5	CytB6-F_Fe-S	0.14	7.4	0.1
Neonectria coccinea CBS 119158	Prot_4090	PF02224.13	Cytidylate_kin	0.0042	11.6	0.1
Neonectria coccinea CBS 119158	Prot_9985	PF09265.5	Cytokin-bind	0.0031	11.8	0
Neonectria coccinea CBS 119158	Prot_3194	PF01266.19	DAO	1.5e-09	32.3	0
Neonectria coccinea CBS 119158	Prot_9436	PF01266.19	DAO	2e-07	25.3	1
Neonectria coccinea CBS 119158	Prot_591	PF01266.19	DAO	7.4e-08	26.7	0.1
Neonectria coccinea CBS 119158	Prot_2541	PF01266.19	DAO	1.3e-06	22.7	0.1
Neonectria coccinea CBS 119158	Prot_1579	PF01266.19	DAO	5.5e-08	27.1	0.3
Neonectria coccinea CBS 119158	Prot_1288	PF01266.19	DAO	8.5e-07	23.2	0
Neonectria coccinea CBS 119158	Prot_10338	PF01266.19	DAO	6.7e-06	20.3	4.1
Neonectria coccinea CBS 119158	Prot_5325	PF01266.19	DAO	3.2e-05	18	0.2
Neonectria coccinea CBS 119158	Prot_12464	PF01266.19	DAO	0.00015	15.9	0
Neonectria coccinea CBS 119158	Prot_1589	PF01266.19	DAO	7.4e-05	16.9	0.3
Neonectria coccinea CBS 119158	Prot_2631	PF01266.19	DAO	8.6e-05	16.6	0.1
Neonectria coccinea CBS 119158	Prot_12163	PF01266.19	DAO	0.00027	15	0.4
Neonectria coccinea CBS 119158	Prot_7690	PF01266.19	DAO	0.015	9.2	0.2
Neonectria coccinea CBS 119158	Prot_7353	PF01266.19	DAO	0.0098	9.9	0.5
Neonectria coccinea CBS 119158	Prot_12531	PF07213.6	DAP10	0.19	6.7	0.6
Neonectria coccinea CBS 119158	Prot_10550	PF03344.10	Daxx	0.024	8.2	12.5
Neonectria coccinea CBS 119158	Prot_5562	PF03344.10	Daxx	0.054	7	17.5
Neonectria coccinea CBS 119158	Prot_9505	PF03344.10	Daxx	0.31	4.5	13
Neonectria coccinea CBS 119158	Prot_8982	PF03344.10	Daxx	1.2	2.5	23.4
Neonectria coccinea CBS 119158	Prot_6221	PF01682.14	DB	0.29	6.3	2.7
Neonectria coccinea CBS 119158	Prot_5899	PF13701.1	DDE_Tnp_1_4	0.0012	12.2	0
Neonectria coccinea CBS 119158	Prot_6556	PF02862.12	DDHD	4.7	2	15.7
Neonectria coccinea CBS 119158	Prot_11058	PF03345.9	DDOST_48kD	2.3e-157	518.9	0
Neonectria coccinea CBS 119158	Prot_9670	PF08841.5	DDR	0.0019	12.2	0.2
Neonectria coccinea CBS 119158	Prot_4183	PF00879.13	Defensin_propep	0.012	10.7	1
Neonectria coccinea CBS 119158	Prot_6556	PF14286.1	DHHW	1.8	2.8	18.1
Neonectria coccinea CBS 119158	Prot_2279	PF11492.3	Dicistro_VP4	0.78	5	0
Neonectria coccinea CBS 119158	Prot_320	PF05086.7	Dicty_REP	0.45	3.2	15.7
Neonectria coccinea CBS 119158	Prot_6823	PF05086.7	Dicty_REP	0.56	2.9	6.8
Neonectria coccinea CBS 119158	Prot_8571	PF05086.7	Dicty_REP	2	1.1	10
Neonectria coccinea CBS 119158	Prot_8201	PF00775.16	Dioxygenase_C	0.00024	15.5	0
Neonectria coccinea CBS 119158	Prot_63	PF01965.19	DJ-1_PfpI	0.0073	10.9	0
Neonectria coccinea CBS 119158	Prot_1497	PF01738.13	DLH	1.7e-06	22.5	0
Neonectria coccinea CBS 119158	Prot_320	PF00242.12	DNA_pol_viral_N	0.69	3.9	11.7
Neonectria coccinea CBS 119158	Prot_8313	PF00242.12	DNA_pol_viral_N	1.2	3.2	8.7
Neonectria coccinea CBS 119158	Prot_5743	PF00242.12	DNA_pol_viral_N	1.1	3.3	10.2
Neonectria coccinea CBS 119158	Prot_9331	PF00242.12	DNA_pol_viral_N	13	-0.2	14.7
Neonectria coccinea CBS 119158	Prot_4294	PF03330.13	DPBB_1	4.5e-10	34.5	0
Neonectria coccinea CBS 119158	Prot_5541	PF03330.13	DPBB_1	2.1e-08	29.2	0.1
Neonectria coccinea CBS 119158	Prot_6718	PF00930.16	DPPIV_N	2.6e-108	356.8	1.2
Neonectria coccinea CBS 119158	Prot_3641	PF00930.16	DPPIV_N	0.0016	12.2	0
Neonectria coccinea CBS 119158	Prot_8436	PF06262.6	Zincin_1	0.0074	11.2	0.2
Neonectria coccinea CBS 119158	Prot_8435	PF06280.7	fn3_5	1.2e-11	40.2	0.1
Neonectria coccinea CBS 119158	Prot_4549	PF06342.7	DUF1057	0.0025	11.7	0
Neonectria coccinea CBS 119158	Prot_3235	PF06342.7	DUF1057	0.0056	10.6	0
Neonectria coccinea CBS 119158	Prot_2537	PF06439.6	DUF1080	0.00079	14.4	0
Neonectria coccinea CBS 119158	Prot_6565	PF06500.6	DUF1100	1.8e-05	18.6	0
Neonectria coccinea CBS 119158	Prot_6326	PF06682.7	SARAF	1.2e-81	269.9	8.7
Neonectria coccinea CBS 119158	Prot_6823	PF06697.7	DUF1191	0.00015	15.8	0
Neonectria coccinea CBS 119158	Prot_7548	PF06697.7	DUF1191	0.0036	11.2	0
Neonectria coccinea CBS 119158	Prot_2382	PF06724.6	DUF1206	0.0012	13.7	0.4
Neonectria coccinea CBS 119158	Prot_12863	PF07394.7	DUF1501	0.0041	11.1	0.1
Neonectria coccinea CBS 119158	Prot_10550	PF07423.6	DUF1510	0.13	6.7	8.1
Neonectria coccinea CBS 119158	Prot_6661	PF07466.6	DUF1517	0.00084	13.5	0.4
Neonectria coccinea CBS 119158	Prot_2858	PF07510.6	DUF1524	3.2e-15	51.3	0
Neonectria coccinea CBS 119158	Prot_1948	PF07617.6	DUF1579	0.0051	11.6	0
Neonectria coccinea CBS 119158	Prot_11080	PF07774.8	EMC1_C	1.1e-61	202.9	0
Neonectria coccinea CBS 119158	Prot_5743	PF07897.6	EAR	0.76	4.6	18.3
Neonectria coccinea CBS 119158	Prot_9461	PF08224.6	DUF1719	0.025	8.7	0.3
Neonectria coccinea CBS 119158	Prot_2537	PF09224.6	DUF1961	2.2e-83	273.8	0
Neonectria coccinea CBS 119158	Prot_9329	PF09260.6	DUF1966	8.7e-30	97.8	0.7
Neonectria coccinea CBS 119158	Prot_2652	PF09260.6	DUF1966	1.1e-05	20.5	0.1
Neonectria coccinea CBS 119158	Prot_8390	PF09594.5	GT87	0.024	9.2	5.4
Neonectria coccinea CBS 119158	Prot_6556	PF09747.4	DUF2052	2.1	3.4	14.4
Neonectria coccinea CBS 119158	Prot_538	PF09884.4	DUF2111	0.005	11.8	0.5
Neonectria coccinea CBS 119158	Prot_320	PF10220.4	Smg8_Smg9	2.3	1.1	10.6
Neonectria coccinea CBS 119158	Prot_9807	PF09949.4	DUF2183	2.8e-18	60.9	0.1
Neonectria coccinea CBS 119158	Prot_1779	PF09964.4	DUF2198	0.0071	11.3	0
Neonectria coccinea CBS 119158	Prot_353	PF13203.1	DUF2201_N	0.022	9	7.5
Neonectria coccinea CBS 119158	Prot_11030	PF13203.1	DUF2201_N	0.1	6.8	5.4
Neonectria coccinea CBS 119158	Prot_9331	PF13203.1	DUF2201_N	0.3	5.3	9
Neonectria coccinea CBS 119158	Prot_4099	PF09970.4	DUF2204	0.011	10.3	0
Neonectria coccinea CBS 119158	Prot_12104	PF10265.4	Miga	3	1.5	11.7
Neonectria coccinea CBS 119158	Prot_12863	PF02995.12	DUF229	0.00023	14.8	0.2
Neonectria coccinea CBS 119158	Prot_12164	PF10230.4	LIDHydrolase	0.00039	15	0
Neonectria coccinea CBS 119158	Prot_5380	PF10080.4	DUF2318	0.062	8.2	0.4
Neonectria coccinea CBS 119158	Prot_8571	PF10310.4	DUF5427	1.5	2.6	13.3
Neonectria coccinea CBS 119158	Prot_10550	PF10446.4	DUF2457	4e-05	17.6	14.9
Neonectria coccinea CBS 119158	Prot_11030	PF10446.4	DUF2457	0.72	3.5	23.5
Neonectria coccinea CBS 119158	Prot_2073	PF10446.4	DUF2457	2.3	1.9	15.7
Neonectria coccinea CBS 119158	Prot_6823	PF10667.4	DUF2486	0.014	11	22.8
Neonectria coccinea CBS 119158	Prot_7072	PF10880.3	DUF2673	0.024	9.8	0.6
Neonectria coccinea CBS 119158	Prot_6661	PF10916.3	DUF2712	0.0011	14	1.6
Neonectria coccinea CBS 119158	Prot_2404	PF10977.3	DUF2797	0.0037	12	0.2
Neonectria coccinea CBS 119158	Prot_6565	PF11144.3	DUF2920	0.0005	14.2	0
Neonectria coccinea CBS 119158	Prot_3021	PF11162.3	DUF2946	0.0021	13.4	5.5
Neonectria coccinea CBS 119158	Prot_11025	PF11187.3	DUF2974	0.00011	16.7	0.2
Neonectria coccinea CBS 119158	Prot_2073	PF11200.3	DUF2981	0.44	4.6	17.9
Neonectria coccinea CBS 119158	Prot_3235	PF11288.3	DUF3089	0.0006	14.1	0
Neonectria coccinea CBS 119158	Prot_9153	PF11327.3	Egh16-like	9e-60	196.7	4.7
Neonectria coccinea CBS 119158	Prot_12114	PF11327.3	Egh16-like	1.4e-57	189.6	13.3
Neonectria coccinea CBS 119158	Prot_2684	PF11489.3	Aim21	0.01	9.6	3.1
Neonectria coccinea CBS 119158	Prot_11285	PF11596.3	DUF3246	0.0001	16.8	16
Neonectria coccinea CBS 119158	Prot_9505	PF11679.3	DUF3275	0.26	6	9.3
Neonectria coccinea CBS 119158	Prot_11030	PF11862.3	DUF3382	0.52	5.4	0
Neonectria coccinea CBS 119158	Prot_558	PF11937.3	DUF3455	1.2e-24	82.3	0
Neonectria coccinea CBS 119158	Prot_4089	PF12131.3	DUF3586	0.0013	13.9	2
Neonectria coccinea CBS 119158	Prot_9436	PF12227.3	DUF3603	0.0031	11.7	0
Neonectria coccinea CBS 119158	Prot_8749	PF12611.3	Flagellar_put	0.16	6.7	0
Neonectria coccinea CBS 119158	Prot_1538	PF04041.8	Glyco_hydro_130	0.0029	11.4	0
Neonectria coccinea CBS 119158	Prot_320	PF12877.2	DUF3827	0.014	8.6	11.7
Neonectria coccinea CBS 119158	Prot_3058	PF12877.2	DUF3827	0.74	2.9	10.3
Neonectria coccinea CBS 119158	Prot_353	PF12877.2	DUF3827	6.3	-0.2	13.4
Neonectria coccinea CBS 119158	Prot_6221	PF13165.1	SCIFF	0.68	4.8	0.5
Neonectria coccinea CBS 119158	Prot_1794	PF13313.1	DUF4082	0.0015	13.1	0
Neonectria coccinea CBS 119158	Prot_5380	PF13978.1	DUF4223	0.61	5	0.3
Neonectria coccinea CBS 119158	Prot_1963	PF14021.1	TNT	6.8e-31	101.6	0
Neonectria coccinea CBS 119158	Prot_8608	PF14283.1	DUF4366	1.7e-05	19.4	0
Neonectria coccinea CBS 119158	Prot_7944	PF14283.1	DUF4366	4e-05	18.2	0.6
Neonectria coccinea CBS 119158	Prot_8313	PF14283.1	DUF4366	0.0036	11.8	1.4
Neonectria coccinea CBS 119158	Prot_8982	PF14362.1	DUF4407	6.7	0.6	12.9
Neonectria coccinea CBS 119158	Prot_11687	PF14388.1	DUF4419	7.2e-54	178.1	0
Neonectria coccinea CBS 119158	Prot_11254	PF14610.1	DUF4448	0.00058	14.5	0
Neonectria coccinea CBS 119158	Prot_571	PF14610.1	DUF4448	0.0008	14	0
Neonectria coccinea CBS 119158	Prot_1035	PF14739.1	DUF4472	0.0015	14.1	0.7
Neonectria coccinea CBS 119158	Prot_4126	PF14988.1	DUF4515	0.0033	12.2	0.4
Neonectria coccinea CBS 119158	Prot_6823	PF15087.1	DUF4551	12	-0.8	11
Neonectria coccinea CBS 119158	Prot_306	PF15087.1	DUF4551	12	-0.9	16.4
Neonectria coccinea CBS 119158	Prot_7994	PF15257.1	DUF4590	0.0051	11.7	0
Neonectria coccinea CBS 119158	Prot_6556	PF15262.1	DUF4592	4	3.1	20.5
Neonectria coccinea CBS 119158	Prot_89	PF04312.8	DUF460	0.022	9.4	0.1
Neonectria coccinea CBS 119158	Prot_12104	PF15391.1	DUF4614	0.089	7.6	10.3
Neonectria coccinea CBS 119158	Prot_3058	PF15465.1	DUF4634	0.0088	11.4	0.1
Neonectria coccinea CBS 119158	Prot_320	PF15546.1	DUF4653	0.046	8.1	9.8
Neonectria coccinea CBS 119158	Prot_2715	PF04370.7	DUF508	0.57	4.9	6.8
Neonectria coccinea CBS 119158	Prot_7944	PF04415.7	DUF515	0.36	4.1	7.3
Neonectria coccinea CBS 119158	Prot_8313	PF04415.7	DUF515	6.6	-0.1	14.2
Neonectria coccinea CBS 119158	Prot_7072	PF04415.7	DUF515	5.7	0.1	16.7
Neonectria coccinea CBS 119158	Prot_9505	PF04484.7	QWRF	0.24	5.9	14.6
Neonectria coccinea CBS 119158	Prot_320	PF04502.8	DUF572	0.35	5.1	11.2
Neonectria coccinea CBS 119158	Prot_6753	PF04502.8	DUF572	0.81	3.9	15.5
Neonectria coccinea CBS 119158	Prot_1229	PF04652.11	Vta1	0.15	6.5	9.6
Neonectria coccinea CBS 119158	Prot_2516	PF04652.11	Vta1	0.13	6.7	25.4
Neonectria coccinea CBS 119158	Prot_3286	PF05055.7	DUF677	0.0052	10.6	0.1
Neonectria coccinea CBS 119158	Prot_11638	PF05501.6	DUF755	4.8	2.4	22.2
Neonectria coccinea CBS 119158	Prot_617	PF06004.7	DUF903	0.019	9.6	0
Neonectria coccinea CBS 119158	Prot_4549	PF06028.6	DUF915	0.00093	13.4	0
Neonectria coccinea CBS 119158	Prot_306	PF06075.7	DUF936	1.2	3	24.9
Neonectria coccinea CBS 119158	Prot_4195	PF06131.6	DUF963	6.3e-07	23.7	5
Neonectria coccinea CBS 119158	Prot_9723	PF06136.8	DUF966	0.037	8.5	5.1
Neonectria coccinea CBS 119158	Prot_6556	PF06136.8	DUF966	0.067	7.6	14.2
Neonectria coccinea CBS 119158	Prot_320	PF06136.8	DUF966	0.084	7.3	14
Neonectria coccinea CBS 119158	Prot_10118	PF02221.10	E1_DerP2_DerF2	1.1e-25	85.6	0.1
Neonectria coccinea CBS 119158	Prot_12328	PF12454.3	Ecm33	0.0016	13.4	0
Neonectria coccinea CBS 119158	Prot_2051	PF12454.3	Ecm33	0.018	10.1	1.2
Neonectria coccinea CBS 119158	Prot_6139	PF00036.27	EF-hand_1	0.0052	11.3	0.1
Neonectria coccinea CBS 119158	Prot_6139	PF13202.1	EF-hand_5	0.013	10.1	0.1
Neonectria coccinea CBS 119158	Prot_89	PF00008.22	EGF	0.69	5.1	4.8
Neonectria coccinea CBS 119158	Prot_89	PF07974.8	EGF_2	0.00044	15.5	14
Neonectria coccinea CBS 119158	Prot_9062	PF06441.7	EHN	1.4e-14	49.1	0.1
Neonectria coccinea CBS 119158	Prot_3641	PF08662.6	eIF2A	0.29	5.9	0
Neonectria coccinea CBS 119158	Prot_2831	PF01105.19	EMP24_GP25L	7.6e-56	183.8	0.1
Neonectria coccinea CBS 119158	Prot_8201	PF01105.19	EMP24_GP25L	5.3e-47	155	0
Neonectria coccinea CBS 119158	Prot_2642	PF12218.3	End_N_terminal	0.0048	11.5	0.2
Neonectria coccinea CBS 119158	Prot_4230	PF12218.3	End_N_terminal	0.0018	12.9	0.6
Neonectria coccinea CBS 119158	Prot_12259	PF12218.3	End_N_terminal	0.0006	14.4	0.2
Neonectria coccinea CBS 119158	Prot_2143	PF12242.3	Eno-Rase_NADH_b	0.00014	16.8	0.4
Neonectria coccinea CBS 119158	Prot_8956	PF12242.3	Eno-Rase_NADH_b	0.00018	16.4	0.2
Neonectria coccinea CBS 119158	Prot_8956	PF01370.16	Epimerase	3.2e-05	18.6	0
Neonectria coccinea CBS 119158	Prot_1734	PF01370.16	Epimerase	9e-05	17.1	0
Neonectria coccinea CBS 119158	Prot_12492	PF07749.7	ERp29	5.7e-26	86.1	0.7
Neonectria coccinea CBS 119158	Prot_1497	PF10503.4	Esterase_phd	0.00053	14.4	0.1
Neonectria coccinea CBS 119158	Prot_2404	PF01012.16	ETF	0.0075	11.1	0.6
Neonectria coccinea CBS 119158	Prot_8725	PF07110.6	EthD	5e-24	80.2	0.1
Neonectria coccinea CBS 119158	Prot_320	PF04621.8	ETS_PEA3_N	0.0067	10.7	6
Neonectria coccinea CBS 119158	Prot_9674	PF03372.18	Exo_endo_phos	6.6e-16	54.1	0.1
Neonectria coccinea CBS 119158	Prot_7543	PF06752.7	E_Pc_C	0.0079	10.8	4.7
Neonectria coccinea CBS 119158	Prot_4183	PF06360.6	E_raikovi_mat	0.11	7.9	5.7
Neonectria coccinea CBS 119158	Prot_9436	PF00890.19	FAD_binding_2	3.1e-09	31.2	0.1
Neonectria coccinea CBS 119158	Prot_2541	PF00890.19	FAD_binding_2	7.8e-08	26.6	0.2
Neonectria coccinea CBS 119158	Prot_1589	PF00890.19	FAD_binding_2	3.8e-08	27.6	2.5
Neonectria coccinea CBS 119158	Prot_1579	PF00890.19	FAD_binding_2	2e-08	28.6	3.9
Neonectria coccinea CBS 119158	Prot_591	PF00890.19	FAD_binding_2	2.5e-07	24.9	0.1
Neonectria coccinea CBS 119158	Prot_2631	PF00890.19	FAD_binding_2	0.00064	13.7	0.1
Neonectria coccinea CBS 119158	Prot_12163	PF00890.19	FAD_binding_2	8.3e-05	16.6	1.1
Neonectria coccinea CBS 119158	Prot_5325	PF00890.19	FAD_binding_2	0.0001	16.4	0
Neonectria coccinea CBS 119158	Prot_12464	PF00890.19	FAD_binding_2	0.0018	12.2	0
Neonectria coccinea CBS 119158	Prot_7690	PF00890.19	FAD_binding_2	0.00098	13.1	0.1
Neonectria coccinea CBS 119158	Prot_3194	PF00890.19	FAD_binding_2	0.00013	16	0.1
Neonectria coccinea CBS 119158	Prot_10338	PF00890.19	FAD_binding_2	0.00067	13.6	1.8
Neonectria coccinea CBS 119158	Prot_1288	PF00890.19	FAD_binding_2	0.0011	12.9	0.2
Neonectria coccinea CBS 119158	Prot_7353	PF00890.19	FAD_binding_2	0.0074	10.2	0.6
Neonectria coccinea CBS 119158	Prot_9436	PF01494.14	FAD_binding_3	3.4e-23	77.3	0
Neonectria coccinea CBS 119158	Prot_2541	PF01494.14	FAD_binding_3	4.1e-07	24.4	0.6
Neonectria coccinea CBS 119158	Prot_1579	PF01494.14	FAD_binding_3	4e-06	21.2	0.6
Neonectria coccinea CBS 119158	Prot_3194	PF01494.14	FAD_binding_3	0.00012	16.3	0.3
Neonectria coccinea CBS 119158	Prot_2631	PF01494.14	FAD_binding_3	0.00039	14.6	0
Neonectria coccinea CBS 119158	Prot_8515	PF01494.14	FAD_binding_3	0.0011	13.1	0.1
Neonectria coccinea CBS 119158	Prot_12163	PF01494.14	FAD_binding_3	0.0013	12.9	0.2
Neonectria coccinea CBS 119158	Prot_591	PF01494.14	FAD_binding_3	0.0022	12.2	0.1
Neonectria coccinea CBS 119158	Prot_2517	PF01565.18	FAD_binding_4	5.5e-29	95.5	4
Neonectria coccinea CBS 119158	Prot_4293	PF01565.18	FAD_binding_4	6.2e-27	88.9	3.7
Neonectria coccinea CBS 119158	Prot_5454	PF01565.18	FAD_binding_4	2e-26	87.2	1
Neonectria coccinea CBS 119158	Prot_2028	PF01565.18	FAD_binding_4	8e-26	85.3	1.7
Neonectria coccinea CBS 119158	Prot_11249	PF01565.18	FAD_binding_4	9.3e-26	85.1	0.3
Neonectria coccinea CBS 119158	Prot_1717	PF01565.18	FAD_binding_4	8.9e-22	72.2	0.3
Neonectria coccinea CBS 119158	Prot_5147	PF01565.18	FAD_binding_4	4.9e-21	69.8	1.4
Neonectria coccinea CBS 119158	Prot_5515	PF01565.18	FAD_binding_4	7.7e-21	69.1	0.2
Neonectria coccinea CBS 119158	Prot_3669	PF01565.18	FAD_binding_4	1.5e-20	68.2	0.2
Neonectria coccinea CBS 119158	Prot_9985	PF01565.18	FAD_binding_4	1.4e-18	61.9	0.4
Neonectria coccinea CBS 119158	Prot_3993	PF01565.18	FAD_binding_4	2.1e-17	58	0.8
Neonectria coccinea CBS 119158	Prot_2473	PF01565.18	FAD_binding_4	7.4e-08	27.1	0
Neonectria coccinea CBS 119158	Prot_1579	PF12831.2	FAD_oxidored	1.2e-09	32.8	0.3
Neonectria coccinea CBS 119158	Prot_591	PF12831.2	FAD_oxidored	7.4e-08	26.9	0.1
Neonectria coccinea CBS 119158	Prot_2541	PF12831.2	FAD_oxidored	1.2e-07	26.2	1.1
Neonectria coccinea CBS 119158	Prot_9436	PF12831.2	FAD_oxidored	1.5e-06	22.7	0.1
Neonectria coccinea CBS 119158	Prot_2516	PF15265.1	FAM196	0.04	8.2	24.9
Neonectria coccinea CBS 119158	Prot_306	PF15265.1	FAM196	0.35	5.1	25.1
Neonectria coccinea CBS 119158	Prot_4266	PF14691.1	Fer4_20	0.29	5.9	0
Neonectria coccinea CBS 119158	Prot_6203	PF13668.1	Ferritin_2	1.4e-17	59	0
Neonectria coccinea CBS 119158	Prot_2573	PF01839.18	FG-GAP	0.00016	16.4	0.6
Neonectria coccinea CBS 119158	Prot_4082	PF01839.18	FG-GAP	5.6e-05	17.9	1.5
Neonectria coccinea CBS 119158	Prot_9670	PF02782.11	FGGY_C	0.0059	11.3	0
Neonectria coccinea CBS 119158	Prot_12163	PF09603.5	Fib_succ_major	0.009	11.6	0
Neonectria coccinea CBS 119158	Prot_7287	PF08884.6	Flagellin_D3	0.054	8.8	0.7
Neonectria coccinea CBS 119158	Prot_4126	PF02465.13	FliD_N	3.6	3.2	0.1
Neonectria coccinea CBS 119158	Prot_7050	PF14310.1	Fn3-like	2.7e-23	76.9	0.1
Neonectria coccinea CBS 119158	Prot_4244	PF14310.1	Fn3-like	4e-17	57.1	0
Neonectria coccinea CBS 119158	Prot_4545	PF14686.1	fn3_3	1.2e-18	62.2	3.8
Neonectria coccinea CBS 119158	Prot_9331	PF14686.1	fn3_3	5.2e-16	53.7	3.7
Neonectria coccinea CBS 119158	Prot_5995	PF14686.1	fn3_3	8.9e-11	36.9	0.5
Neonectria coccinea CBS 119158	Prot_9208	PF02434.11	Fringe	0.00012	16.5	0
Neonectria coccinea CBS 119158	Prot_3235	PF03959.8	FSH1	0.00028	15.5	0
Neonectria coccinea CBS 119158	Prot_9670	PF14450.1	FtsA	0.008	11.1	0.6
Neonectria coccinea CBS 119158	Prot_8668	PF01392.17	FZ	0.026	10	0.7
Neonectria coccinea CBS 119158	Prot_954	PF13975.1	gag-asp_proteas	0.041	8.9	0
Neonectria coccinea CBS 119158	Prot_9058	PF01571.16	GCV_T	0.0019	12.7	0
Neonectria coccinea CBS 119158	Prot_7290	PF03009.12	GDPD	4.1e-13	44.5	0
Neonectria coccinea CBS 119158	Prot_2652	PF14871.1	GHL6	0.0014	13.8	0
Neonectria coccinea CBS 119158	Prot_5325	PF01134.17	GIDA	0.0038	11.2	0.1
Neonectria coccinea CBS 119158	Prot_1579	PF01134.17	GIDA	3.3e-06	21.3	0.5
Neonectria coccinea CBS 119158	Prot_2541	PF01134.17	GIDA	5.8e-06	20.5	0.1
Neonectria coccinea CBS 119158	Prot_9436	PF01134.17	GIDA	6.4e-06	20.3	0.3
Neonectria coccinea CBS 119158	Prot_591	PF01134.17	GIDA	0.00023	15.2	0.1
Neonectria coccinea CBS 119158	Prot_10338	PF01134.17	GIDA	0.11	6.4	0.1
Neonectria coccinea CBS 119158	Prot_879	PF01832.15	Glucosaminidase	0.17	7.1	0
Neonectria coccinea CBS 119158	Prot_12492	PF00462.19	Glutaredoxin	1	4.6	0
Neonectria coccinea CBS 119158	Prot_6661	PF13436.1	Gly-zipper_OmpA	0.0035	12.1	6.7
Neonectria coccinea CBS 119158	Prot_11880	PF14845.1	Glycohydro_20b2	1.8e-23	78.7	0
Neonectria coccinea CBS 119158	Prot_10757	PF00331.15	Glyco_hydro_10	6.9e-97	319.4	0
Neonectria coccinea CBS 119158	Prot_633	PF00331.15	Glyco_hydro_10	0.00064	13.9	0
Neonectria coccinea CBS 119158	Prot_9923	PF00457.12	Glyco_hydro_11	2.2e-82	269.9	17.8
Neonectria coccinea CBS 119158	Prot_759	PF00457.12	Glyco_hydro_11	5.6e-82	268.6	20.8
Neonectria coccinea CBS 119158	Prot_5743	PF00722.16	Glyco_hydro_16	1.2e-45	150.2	2.2
Neonectria coccinea CBS 119158	Prot_80	PF00722.16	Glyco_hydro_16	8.6e-46	150.6	4.6
Neonectria coccinea CBS 119158	Prot_12104	PF00722.16	Glyco_hydro_16	8.3e-43	140.9	7.4
Neonectria coccinea CBS 119158	Prot_3177	PF00722.16	Glyco_hydro_16	1.3e-41	137.1	1.7
Neonectria coccinea CBS 119158	Prot_12328	PF00722.16	Glyco_hydro_16	8.8e-40	131	2.7
Neonectria coccinea CBS 119158	Prot_2746	PF00722.16	Glyco_hydro_16	2.4e-19	64.4	0.4
Neonectria coccinea CBS 119158	Prot_2544	PF00722.16	Glyco_hydro_16	7.5e-18	59.6	0.1
Neonectria coccinea CBS 119158	Prot_3679	PF00722.16	Glyco_hydro_16	8.1e-18	59.4	0.1
Neonectria coccinea CBS 119158	Prot_9058	PF00722.16	Glyco_hydro_16	3e-17	57.6	2.7
Neonectria coccinea CBS 119158	Prot_617	PF00722.16	Glyco_hydro_16	6.2e-14	46.8	3.7
Neonectria coccinea CBS 119158	Prot_2167	PF00722.16	Glyco_hydro_16	8.1e-14	46.4	0.2
Neonectria coccinea CBS 119158	Prot_11049	PF00722.16	Glyco_hydro_16	2.8e-12	41.4	5.6
Neonectria coccinea CBS 119158	Prot_1440	PF00332.13	Glyco_hydro_17	7.3e-17	56.4	0.1
Neonectria coccinea CBS 119158	Prot_11176	PF00332.13	Glyco_hydro_17	2.8e-05	18.4	0
Neonectria coccinea CBS 119158	Prot_12422	PF00332.13	Glyco_hydro_17	1.1e-05	19.7	0.1
Neonectria coccinea CBS 119158	Prot_12025	PF00704.23	Glyco_hydro_18	3.7e-95	314.3	10.4
Neonectria coccinea CBS 119158	Prot_5867	PF00704.23	Glyco_hydro_18	8.7e-95	313.1	9.9
Neonectria coccinea CBS 119158	Prot_5460	PF00704.23	Glyco_hydro_18	1.7e-79	262.8	0.9
Neonectria coccinea CBS 119158	Prot_10630	PF00704.23	Glyco_hydro_18	4.8e-79	261.3	0.8
Neonectria coccinea CBS 119158	Prot_2641	PF00704.23	Glyco_hydro_18	9.7e-78	257.1	0.3
Neonectria coccinea CBS 119158	Prot_1687	PF00704.23	Glyco_hydro_18	8.3e-49	161.9	3.6
Neonectria coccinea CBS 119158	Prot_1792	PF00704.23	Glyco_hydro_18	1.4e-46	154.6	0.2
Neonectria coccinea CBS 119158	Prot_11880	PF00728.17	Glyco_hydro_20	2.5e-85	281.8	0
Neonectria coccinea CBS 119158	Prot_11880	PF02838.10	Glyco_hydro_20b	3.5e-07	25.9	0
Neonectria coccinea CBS 119158	Prot_538	PF00295.12	Glyco_hydro_28	4.6e-105	346.2	19.4
Neonectria coccinea CBS 119158	Prot_11667	PF00295.12	Glyco_hydro_28	1.1e-97	322	19
Neonectria coccinea CBS 119158	Prot_6686	PF00295.12	Glyco_hydro_28	2.5e-96	317.5	14.1
Neonectria coccinea CBS 119158	Prot_2775	PF00295.12	Glyco_hydro_28	1.9e-47	156.9	4.8
Neonectria coccinea CBS 119158	Prot_4110	PF00295.12	Glyco_hydro_28	5.1e-43	142.3	0.1
Neonectria coccinea CBS 119158	Prot_7023	PF00295.12	Glyco_hydro_28	7.2e-36	118.8	3.9
Neonectria coccinea CBS 119158	Prot_10340	PF00295.12	Glyco_hydro_28	2.4e-24	80.9	0.1
Neonectria coccinea CBS 119158	Prot_633	PF02836.12	Glyco_hydro_2_C	4.9e-09	30.6	0.1
Neonectria coccinea CBS 119158	Prot_407	PF02836.12	Glyco_hydro_2_C	3.4e-07	24.5	0.3
Neonectria coccinea CBS 119158	Prot_4244	PF00933.16	Glyco_hydro_3	5.7e-91	299.6	0
Neonectria coccinea CBS 119158	Prot_7050	PF00933.16	Glyco_hydro_3	1.4e-82	272.1	0
Neonectria coccinea CBS 119158	Prot_11248	PF00251.15	Glyco_hydro_32N	4.7e-06	21.3	0
Neonectria coccinea CBS 119158	Prot_8279	PF00251.15	Glyco_hydro_32N	0.0036	11.8	1.2
Neonectria coccinea CBS 119158	Prot_4244	PF01915.17	Glyco_hydro_3_C	5.8e-54	178.1	0
Neonectria coccinea CBS 119158	Prot_7050	PF01915.17	Glyco_hydro_3_C	3.8e-40	132.9	0
Neonectria coccinea CBS 119158	Prot_633	PF02449.10	Glyco_hydro_42	4.8e-06	21	0
Neonectria coccinea CBS 119158	Prot_11248	PF04616.9	Glyco_hydro_43	7.2e-55	181.1	3
Neonectria coccinea CBS 119158	Prot_8279	PF04616.9	Glyco_hydro_43	1e-50	167.5	3.1
Neonectria coccinea CBS 119158	Prot_2316	PF04616.9	Glyco_hydro_43	9e-43	141.4	6.8
Neonectria coccinea CBS 119158	Prot_7287	PF04616.9	Glyco_hydro_43	1.2e-38	127.9	6.8
Neonectria coccinea CBS 119158	Prot_12532	PF04616.9	Glyco_hydro_43	2.5e-23	77.6	0
Neonectria coccinea CBS 119158	Prot_10310	PF04616.9	Glyco_hydro_43	2e-19	64.8	2
Neonectria coccinea CBS 119158	Prot_7707	PF04616.9	Glyco_hydro_43	1e-13	46.1	6.2
Neonectria coccinea CBS 119158	Prot_2648	PF02015.11	Glyco_hydro_45	5.4e-89	292.6	19.6
Neonectria coccinea CBS 119158	Prot_10369	PF07745.8	Glyco_hydro_53	2e-106	350.6	0
Neonectria coccinea CBS 119158	Prot_2694	PF01341.12	Glyco_hydro_6	1.2e-107	354.8	3
Neonectria coccinea CBS 119158	Prot_9201	PF03443.9	Glyco_hydro_61	1.4e-78	258.8	0.1
Neonectria coccinea CBS 119158	Prot_5988	PF03443.9	Glyco_hydro_61	7.6e-75	246.5	0.2
Neonectria coccinea CBS 119158	Prot_9268	PF03443.9	Glyco_hydro_61	1.7e-63	209.4	0
Neonectria coccinea CBS 119158	Prot_6772	PF03443.9	Glyco_hydro_61	2.1e-52	173.1	0
Neonectria coccinea CBS 119158	Prot_2652	PF02324.11	Glyco_hydro_70	0.0045	9.8	0.1
Neonectria coccinea CBS 119158	Prot_407	PF03198.9	Glyco_hydro_72	4.5e-125	411.8	6.2
Neonectria coccinea CBS 119158	Prot_10885	PF03198.9	Glyco_hydro_72	4.2e-124	408.7	5.3
Neonectria coccinea CBS 119158	Prot_1309	PF03198.9	Glyco_hydro_72	2.7e-112	369.9	0.8
Neonectria coccinea CBS 119158	Prot_7470	PF07335.6	Glyco_hydro_75	2.2e-48	159.2	0.3
Neonectria coccinea CBS 119158	Prot_6195	PF07335.6	Glyco_hydro_75	7.7e-47	154.2	0.1
Neonectria coccinea CBS 119158	Prot_12088	PF03663.9	Glyco_hydro_76	1.1e-18	62.8	0.1
Neonectria coccinea CBS 119158	Prot_2641	PF03644.8	Glyco_hydro_85	0.00037	14.8	0
Neonectria coccinea CBS 119158	Prot_5460	PF03644.8	Glyco_hydro_85	0.0022	12.2	0
Neonectria coccinea CBS 119158	Prot_7489	PF11790.3	Glyco_hydro_cc	1.4e-66	219.4	1.7
Neonectria coccinea CBS 119158	Prot_10885	PF11790.3	Glyco_hydro_cc	0.00037	15.1	0.3
Neonectria coccinea CBS 119158	Prot_954	PF03808.8	Glyco_tran_WecB	0.018	9.6	0
Neonectria coccinea CBS 119158	Prot_10338	PF05199.8	GMC_oxred_C	4.3e-42	138.9	0
Neonectria coccinea CBS 119158	Prot_2631	PF05199.8	GMC_oxred_C	2.4e-38	126.8	0.1
Neonectria coccinea CBS 119158	Prot_12464	PF05199.8	GMC_oxred_C	7.4e-33	109	0.2
Neonectria coccinea CBS 119158	Prot_7690	PF05199.8	GMC_oxred_C	1e-32	108.5	0
Neonectria coccinea CBS 119158	Prot_12163	PF05199.8	GMC_oxred_C	2.3e-30	100.9	0
Neonectria coccinea CBS 119158	Prot_7353	PF05199.8	GMC_oxred_C	8.3e-30	99.1	0
Neonectria coccinea CBS 119158	Prot_1589	PF05199.8	GMC_oxred_C	1.7e-23	78.6	0.5
Neonectria coccinea CBS 119158	Prot_2541	PF05199.8	GMC_oxred_C	1.9e-20	68.7	0.1
Neonectria coccinea CBS 119158	Prot_2631	PF00732.14	GMC_oxred_N	1e-60	200.5	0
Neonectria coccinea CBS 119158	Prot_12464	PF00732.14	GMC_oxred_N	3.4e-57	188.9	0
Neonectria coccinea CBS 119158	Prot_10338	PF00732.14	GMC_oxred_N	1.4e-54	180.3	0.5
Neonectria coccinea CBS 119158	Prot_7690	PF00732.14	GMC_oxred_N	1.4e-22	75.3	0
Neonectria coccinea CBS 119158	Prot_12163	PF00732.14	GMC_oxred_N	5.6e-28	93	0
Neonectria coccinea CBS 119158	Prot_7353	PF00732.14	GMC_oxred_N	6.1e-25	83	0.1
Neonectria coccinea CBS 119158	Prot_1589	PF00732.14	GMC_oxred_N	2e-26	87.9	0
Neonectria coccinea CBS 119158	Prot_2541	PF00732.14	GMC_oxred_N	1.8e-24	81.5	0
Neonectria coccinea CBS 119158	Prot_591	PF00732.14	GMC_oxred_N	0.0058	10.9	0
Neonectria coccinea CBS 119158	Prot_9757	PF10342.4	GPI-anchored	0.0062	12.2	0.2
Neonectria coccinea CBS 119158	Prot_10333	PF01825.16	GPS	0.00075	14.7	0.2
Neonectria coccinea CBS 119158	Prot_12114	PF07172.6	GRP	0.023	10.3	15.1
Neonectria coccinea CBS 119158	Prot_8529	PF07995.6	GSDH	9.4e-08	26.5	0.4
Neonectria coccinea CBS 119158	Prot_6823	PF04388.7	Hamartin	2.2	1.9	14.5
Neonectria coccinea CBS 119158	Prot_2516	PF04388.7	Hamartin	5.3	0.6	30
Neonectria coccinea CBS 119158	Prot_9934	PF14856.1	Hce2	3.7e-15	50.8	0.1
Neonectria coccinea CBS 119158	Prot_2652	PF14701.1	hDGE_amylase	0.0038	11.2	0
Neonectria coccinea CBS 119158	Prot_89	PF12661.2	hEGF	0.025	9.9	2
Neonectria coccinea CBS 119158	Prot_320	PF05109.8	Herpes_BLLF1	0.0021	11.2	30
Neonectria coccinea CBS 119158	Prot_9201	PF05109.8	Herpes_BLLF1	0.54	3.2	28.1
Neonectria coccinea CBS 119158	Prot_7543	PF06112.6	Herpes_capsid	0.19	6.9	12.3
Neonectria coccinea CBS 119158	Prot_2684	PF06112.6	Herpes_capsid	0.59	5.3	8.2
Neonectria coccinea CBS 119158	Prot_9930	PF06112.6	Herpes_capsid	94	-1.9	14.1
Neonectria coccinea CBS 119158	Prot_8608	PF02480.11	Herpes_gE	0.0015	12	0
Neonectria coccinea CBS 119158	Prot_10550	PF05297.6	Herpes_LMP1	0.42	4.5	8.9
Neonectria coccinea CBS 119158	Prot_12598	PF03326.8	Herpes_TAF50	0.74	3.7	11.9
Neonectria coccinea CBS 119158	Prot_3194	PF06985.6	HET	1e-29	98.6	0.1
Neonectria coccinea CBS 119158	Prot_6987	PF07217.6	Het-C	1.5e-288	953.1	0
Neonectria coccinea CBS 119158	Prot_4449	PF00132.19	Hexapep	4e-11	37.1	2.9
Neonectria coccinea CBS 119158	Prot_4449	PF14602.1	Hexapep_2	3.2e-11	37.7	3
Neonectria coccinea CBS 119158	Prot_5743	PF03753.8	HHV6-IE	0.69	2.3	20.9
Neonectria coccinea CBS 119158	Prot_2541	PF03486.9	HI0933_like	3.3e-08	27.5	0.2
Neonectria coccinea CBS 119158	Prot_9436	PF03486.9	HI0933_like	3.6e-06	20.7	0.4
Neonectria coccinea CBS 119158	Prot_591	PF03486.9	HI0933_like	5.2e-06	20.2	0
Neonectria coccinea CBS 119158	Prot_1579	PF03486.9	HI0933_like	1.3e-06	22.2	3.5
Neonectria coccinea CBS 119158	Prot_1589	PF03486.9	HI0933_like	8.6e-06	19.5	0.2
Neonectria coccinea CBS 119158	Prot_5325	PF03486.9	HI0933_like	0.00015	15.4	0
Neonectria coccinea CBS 119158	Prot_12464	PF03486.9	HI0933_like	0.0052	10.4	0
Neonectria coccinea CBS 119158	Prot_12163	PF03486.9	HI0933_like	0.009	9.6	0.2
Neonectria coccinea CBS 119158	Prot_10338	PF03486.9	HI0933_like	0.0066	10	0.2
Neonectria coccinea CBS 119158	Prot_353	PF12722.2	Hid1	0.69	2.5	7.5
Neonectria coccinea CBS 119158	Prot_9505	PF12722.2	Hid1	0.88	2.2	7.4
Neonectria coccinea CBS 119158	Prot_2516	PF12722.2	Hid1	1.9	1.1	25.5
Neonectria coccinea CBS 119158	Prot_6823	PF12722.2	Hid1	10	-1.3	13
Neonectria coccinea CBS 119158	Prot_9109	PF00300.17	His_Phos_1	0.003	12.8	0
Neonectria coccinea CBS 119158	Prot_9109	PF00328.17	His_Phos_2	4.6e-24	80.4	0
Neonectria coccinea CBS 119158	Prot_7350	PF00505.14	HMG_box	0.00053	15.4	0
Neonectria coccinea CBS 119158	Prot_7350	PF09011.5	HMG_box_2	0.0041	12.6	0.1
Neonectria coccinea CBS 119158	Prot_6761	PF13933.1	HRXXH	5e-105	345.4	0
Neonectria coccinea CBS 119158	Prot_5519	PF12296.3	HsbA	1.6e-07	26.4	2.2
Neonectria coccinea CBS 119158	Prot_9670	PF00012.15	HSP70	2.8e-269	889.2	15.1
Neonectria coccinea CBS 119158	Prot_8098	PF13560.1	HTH_31	0.0058	12	0
Neonectria coccinea CBS 119158	Prot_9670	PF01968.13	Hydantoinase_A	0.00072	13.8	0.1
Neonectria coccinea CBS 119158	Prot_6221	PF07486.7	Hydrolase_2	0.3	6.8	0.1
Neonectria coccinea CBS 119158	Prot_9248	PF12146.3	Hydrolase_4	1.9e-05	19.6	0.1
Neonectria coccinea CBS 119158	Prot_4549	PF12146.3	Hydrolase_4	0.00051	15	0
Neonectria coccinea CBS 119158	Prot_12164	PF12146.3	Hydrolase_4	0.012	10.6	0.1
Neonectria coccinea CBS 119158	Prot_6632	PF12146.3	Hydrolase_4	0.0057	11.6	0
Neonectria coccinea CBS 119158	Prot_9594	PF06766.6	Hydrophobin_2	5.5e-28	91.6	8.5
Neonectria coccinea CBS 119158	Prot_1579	PF07991.7	IlvN	0.00038	15	0.6
Neonectria coccinea CBS 119158	Prot_4742	PF05922.11	Inhibitor_I9	1.4e-17	59.1	0
Neonectria coccinea CBS 119158	Prot_9134	PF05922.11	Inhibitor_I9	1.8e-17	58.8	0.1
Neonectria coccinea CBS 119158	Prot_8274	PF05922.11	Inhibitor_I9	2.5e-16	55.2	0.6
Neonectria coccinea CBS 119158	Prot_8978	PF05922.11	Inhibitor_I9	3.2e-09	32.4	0.2
Neonectria coccinea CBS 119158	Prot_9262	PF05922.11	Inhibitor_I9	3.7e-05	19.4	0.1
Neonectria coccinea CBS 119158	Prot_2881	PF07648.10	Kazal_2	0.0088	11.1	0.1
Neonectria coccinea CBS 119158	Prot_11368	PF15152.1	Kisspeptin	4.6	3.2	0
Neonectria coccinea CBS 119158	Prot_2143	PF08659.5	KR	3e-14	48.2	0.1
Neonectria coccinea CBS 119158	Prot_8956	PF08659.5	KR	7.2e-11	37.2	0
Neonectria coccinea CBS 119158	Prot_5325	PF13434.1	K_oxygenase	2.3e-05	18.5	0
Neonectria coccinea CBS 119158	Prot_591	PF13434.1	K_oxygenase	0.2	5.6	0
Neonectria coccinea CBS 119158	Prot_1707	PF00753.22	Lactamase_B	1.5e-06	23.1	0.1
Neonectria coccinea CBS 119158	Prot_1707	PF12706.2	Lactamase_B_2	0.00031	15.4	0.2
Neonectria coccinea CBS 119158	Prot_9986	PF10282.4	Lactonase	2.5e-69	229	0
Neonectria coccinea CBS 119158	Prot_5482	PF10282.4	Lactonase	3.8e-20	67.3	1
Neonectria coccinea CBS 119158	Prot_8728	PF10282.4	Lactonase	0.00038	14.7	0
Neonectria coccinea CBS 119158	Prot_8529	PF10282.4	Lactonase	0.019	9.1	0.1
Neonectria coccinea CBS 119158	Prot_10061	PF03388.8	Lectin_leg-like	5.5e-62	204	0
Neonectria coccinea CBS 119158	Prot_10061	PF00139.14	Lectin_legB	0.0059	11.1	0
Neonectria coccinea CBS 119158	Prot_11078	PF15042.1	LELP1	0.0042	12.4	8.4
Neonectria coccinea CBS 119158	Prot_1779	PF02900.13	LigB	1.6e-51	170	0.2
Neonectria coccinea CBS 119158	Prot_320	PF03353.10	Lin-8	0.14	6.5	8.6
Neonectria coccinea CBS 119158	Prot_2766	PF03583.9	LIP	7.2e-75	246.9	0.7
Neonectria coccinea CBS 119158	Prot_1497	PF03583.9	LIP	0.0039	11.5	0
Neonectria coccinea CBS 119158	Prot_12164	PF03583.9	LIP	0.0073	10.6	1.9
Neonectria coccinea CBS 119158	Prot_11025	PF01764.20	Lipase_3	3.9e-06	21.7	0.1
Neonectria coccinea CBS 119158	Prot_914	PF01764.20	Lipase_3	0.00083	14.1	0
Neonectria coccinea CBS 119158	Prot_9089	PF01764.20	Lipase_3	0.00066	14.4	0
Neonectria coccinea CBS 119158	Prot_4311	PF00657.17	Lipase_GDSL	6.6e-16	53.9	0.1
Neonectria coccinea CBS 119158	Prot_3046	PF00657.17	Lipase_GDSL	1.5e-12	43	0.4
Neonectria coccinea CBS 119158	Prot_6143	PF00657.17	Lipase_GDSL	1.8e-12	42.6	0.2
Neonectria coccinea CBS 119158	Prot_2573	PF00657.17	Lipase_GDSL	1.4e-09	33.2	0
Neonectria coccinea CBS 119158	Prot_4082	PF00657.17	Lipase_GDSL	1.5e-06	23.3	0.1
Neonectria coccinea CBS 119158	Prot_3046	PF13472.1	Lipase_GDSL_2	3.9e-11	38.5	0.7
Neonectria coccinea CBS 119158	Prot_2573	PF13472.1	Lipase_GDSL_2	2.5e-10	35.9	0
Neonectria coccinea CBS 119158	Prot_4082	PF13472.1	Lipase_GDSL_2	3.3e-10	35.5	0.1
Neonectria coccinea CBS 119158	Prot_2573	PF14606.1	Lipase_GDSL_3	7.8e-06	20.8	0
Neonectria coccinea CBS 119158	Prot_4090	PF02169.11	LPP20	0.0024	13.1	0.1
Neonectria coccinea CBS 119158	Prot_10338	PF05834.7	Lycopene_cycl	3.1e-06	21.4	0.1
Neonectria coccinea CBS 119158	Prot_2541	PF05834.7	Lycopene_cycl	3.3e-05	18	0.4
Neonectria coccinea CBS 119158	Prot_1589	PF05834.7	Lycopene_cycl	0.00011	16.3	0.1
Neonectria coccinea CBS 119158	Prot_2631	PF05834.7	Lycopene_cycl	0.00013	16	0.1
Neonectria coccinea CBS 119158	Prot_591	PF05834.7	Lycopene_cycl	0.00023	15.3	0
Neonectria coccinea CBS 119158	Prot_7353	PF05834.7	Lycopene_cycl	0.00063	13.8	0
Neonectria coccinea CBS 119158	Prot_5325	PF05834.7	Lycopene_cycl	0.0037	11.3	0.1
Neonectria coccinea CBS 119158	Prot_1579	PF05834.7	Lycopene_cycl	0.0015	12.5	0.2
Neonectria coccinea CBS 119158	Prot_12464	PF05834.7	Lycopene_cycl	0.0033	11.5	0
Neonectria coccinea CBS 119158	Prot_12163	PF05834.7	Lycopene_cycl	0.0046	11	0.3
Neonectria coccinea CBS 119158	Prot_7690	PF05834.7	Lycopene_cycl	0.0041	11.1	0
Neonectria coccinea CBS 119158	Prot_9436	PF05834.7	Lycopene_cycl	0.017	9.1	0.2
Neonectria coccinea CBS 119158	Prot_1687	PF01476.15	LysM	3e-08	28.6	0
Neonectria coccinea CBS 119158	Prot_8093	PF01476.15	LysM	7.2e-06	21	0
Neonectria coccinea CBS 119158	Prot_2642	PF01476.15	LysM	0.00094	14.2	0
Neonectria coccinea CBS 119158	Prot_52	PF07687.9	M20_dimer	2.5e-18	61	0
Neonectria coccinea CBS 119158	Prot_4449	PF12464.3	Mac	8.2e-13	43.3	0
Neonectria coccinea CBS 119158	Prot_7780	PF09726.4	Macoilin	0.022	8.1	5.1
Neonectria coccinea CBS 119158	Prot_2516	PF09726.4	Macoilin	0.051	6.9	29.4
Neonectria coccinea CBS 119158	Prot_320	PF09726.4	Macoilin	0.15	5.3	14.6
Neonectria coccinea CBS 119158	Prot_353	PF09726.4	Macoilin	0.17	5.1	17.1
Neonectria coccinea CBS 119158	Prot_9505	PF09726.4	Macoilin	0.26	4.5	15.7
Neonectria coccinea CBS 119158	Prot_3058	PF09726.4	Macoilin	0.46	3.7	9.4
Neonectria coccinea CBS 119158	Prot_11638	PF09726.4	Macoilin	0.59	3.4	12.9
Neonectria coccinea CBS 119158	Prot_12598	PF09726.4	Macoilin	0.74	3	9.8
Neonectria coccinea CBS 119158	Prot_80	PF09726.4	Macoilin	3.1	1	14.7
Neonectria coccinea CBS 119158	Prot_5743	PF09726.4	Macoilin	3.6	0.8	26.3
Neonectria coccinea CBS 119158	Prot_6753	PF09726.4	Macoilin	3.8	0.7	31.2
Neonectria coccinea CBS 119158	Prot_6823	PF09726.4	Macoilin	5.4	0.2	20.5
Neonectria coccinea CBS 119158	Prot_6556	PF09726.4	Macoilin	5	0.3	17.8
Neonectria coccinea CBS 119158	Prot_12104	PF09726.4	Macoilin	9.4	-0.6	15.2
Neonectria coccinea CBS 119158	Prot_5562	PF09726.4	Macoilin	9.5	-0.6	10.6
Neonectria coccinea CBS 119158	Prot_9331	PF09726.4	Macoilin	12	-0.9	21.4
Neonectria coccinea CBS 119158	Prot_320	PF03999.7	MAP65_ASE1	3.1	1.3	12.3
Neonectria coccinea CBS 119158	Prot_6556	PF05934.6	MCLC	9.1	-0.5	12.4
Neonectria coccinea CBS 119158	Prot_6823	PF11593.3	Med3	0.00047	14.6	18.2
Neonectria coccinea CBS 119158	Prot_2382	PF11593.3	Med3	0.022	9.1	12.9
Neonectria coccinea CBS 119158	Prot_5430	PF11593.3	Med3	1.5	3	14.9
Neonectria coccinea CBS 119158	Prot_2502	PF11593.3	Med3	1.6	2.9	19.9
Neonectria coccinea CBS 119158	Prot_12795	PF11593.3	Med3	2.7	2.2	11.8
Neonectria coccinea CBS 119158	Prot_1726	PF11593.3	Med3	5.6	1.1	14.1
Neonectria coccinea CBS 119158	Prot_12598	PF11593.3	Med3	4.3	1.5	22.1
Neonectria coccinea CBS 119158	Prot_7543	PF11593.3	Med3	5.8	1.1	11.4
Neonectria coccinea CBS 119158	Prot_3058	PF11593.3	Med3	8.1	0.6	17.7
Neonectria coccinea CBS 119158	Prot_4449	PF02065.13	Melibiase	6.5e-12	39.9	0
Neonectria coccinea CBS 119158	Prot_8313	PF03547.13	Mem_trans	0.0015	11.9	0
Neonectria coccinea CBS 119158	Prot_8571	PF05053.8	Menin	0.038	7.2	4.8
Neonectria coccinea CBS 119158	Prot_4545	PF01420.14	Methylase_S	0.013	10.6	0.1
Neonectria coccinea CBS 119158	Prot_7920	PF08241.7	Methyltransf_11	1.2e-06	24.1	0
Neonectria coccinea CBS 119158	Prot_7920	PF08242.7	Methyltransf_12	0.00025	16.6	0
Neonectria coccinea CBS 119158	Prot_7920	PF12847.2	Methyltransf_18	0.0077	11.9	0
Neonectria coccinea CBS 119158	Prot_7920	PF13489.1	Methyltransf_23	2.1e-05	19.4	0
Neonectria coccinea CBS 119158	Prot_12751	PF13578.1	Methyltransf_24	0.001	15	0.2
Neonectria coccinea CBS 119158	Prot_7920	PF13847.1	Methyltransf_31	0.0089	10.7	0
Neonectria coccinea CBS 119158	Prot_8668	PF12929.2	Mid1	1.9e-131	433.7	7.8
Neonectria coccinea CBS 119158	Prot_306	PF04478.7	Mid2	1.8e-07	25.8	3.5
Neonectria coccinea CBS 119158	Prot_6823	PF04478.7	Mid2	0.0024	12.4	0
Neonectria coccinea CBS 119158	Prot_8313	PF04478.7	Mid2	0.0062	11.1	2.6
Neonectria coccinea CBS 119158	Prot_4126	PF13012.1	MitMem_reg	0.17	7.1	0
Neonectria coccinea CBS 119158	Prot_5699	PF09731.4	Mitofilin	0.0015	12.3	1.7
Neonectria coccinea CBS 119158	Prot_306	PF09731.4	Mitofilin	0.063	6.9	24.9
Neonectria coccinea CBS 119158	Prot_5562	PF09731.4	Mitofilin	0.11	6.1	6.1
Neonectria coccinea CBS 119158	Prot_6753	PF09731.4	Mitofilin	3	1.4	16.8
Neonectria coccinea CBS 119158	Prot_1127	PF10660.4	MitoNEET_N	0.0082	11.1	0
Neonectria coccinea CBS 119158	Prot_5541	PF03404.11	My-co_dimer	0.00062	14.5	0
Neonectria coccinea CBS 119158	Prot_9670	PF06723.8	MreB_MbI	1.5e-16	55	0.9
Neonectria coccinea CBS 119158	Prot_11638	PF15325.1	MRI	0.027	10.6	5.8
Neonectria coccinea CBS 119158	Prot_12795	PF12238.3	MSA-2c	0.00061	14.6	0.7
Neonectria coccinea CBS 119158	Prot_11939	PF07462.6	MSP1_C	0.064	6.7	0
Neonectria coccinea CBS 119158	Prot_7994	PF07462.6	MSP1_C	0.89	2.9	9.7
Neonectria coccinea CBS 119158	Prot_7543	PF07462.6	MSP1_C	0.85	2.9	8.8
Neonectria coccinea CBS 119158	Prot_6661	PF07462.6	MSP1_C	1.4	2.3	9.4
Neonectria coccinea CBS 119158	Prot_6772	PF07462.6	MSP1_C	7.6	-0.2	9.8
Neonectria coccinea CBS 119158	Prot_12531	PF09472.5	MtrF	0.0086	10.5	1.8
Neonectria coccinea CBS 119158	Prot_8313	PF09472.5	MtrF	0.4	5.1	7
Neonectria coccinea CBS 119158	Prot_2684	PF01456.12	Mucin	0.00041	15.3	20.5
Neonectria coccinea CBS 119158	Prot_11670	PF01456.12	Mucin	0.0021	12.9	16.4
Neonectria coccinea CBS 119158	Prot_2502	PF01456.12	Mucin	0.17	6.8	35.5
Neonectria coccinea CBS 119158	Prot_8442	PF01456.12	Mucin	0.27	6.1	33.6
Neonectria coccinea CBS 119158	Prot_10682	PF09610.5	Myco_arth_vir_N	0.00094	14.3	0.3
Neonectria coccinea CBS 119158	Prot_7706	PF09610.5	Myco_arth_vir_N	0.0024	13	0.4
Neonectria coccinea CBS 119158	Prot_7920	PF07942.7	N2227	4.4e-63	207.8	0
Neonectria coccinea CBS 119158	Prot_2143	PF13460.1	NAD_binding_10	4.3e-05	18.7	0.1
Neonectria coccinea CBS 119158	Prot_3194	PF03446.10	NAD_binding_2	0.0028	12.6	0
Neonectria coccinea CBS 119158	Prot_1579	PF13241.1	NAD_binding_7	0.00056	15.3	0.1
Neonectria coccinea CBS 119158	Prot_2143	PF13241.1	NAD_binding_7	0.0067	11.8	0
Neonectria coccinea CBS 119158	Prot_3194	PF13241.1	NAD_binding_7	0.012	11	0
Neonectria coccinea CBS 119158	Prot_591	PF13450.1	NAD_binding_8	5.1e-14	47.2	1
Neonectria coccinea CBS 119158	Prot_1288	PF13450.1	NAD_binding_8	7.9e-13	43.4	0
Neonectria coccinea CBS 119158	Prot_1579	PF13450.1	NAD_binding_8	7.8e-12	40.2	0.1
Neonectria coccinea CBS 119158	Prot_9436	PF13450.1	NAD_binding_8	5e-07	24.8	0.2
Neonectria coccinea CBS 119158	Prot_8515	PF13450.1	NAD_binding_8	9.6e-07	23.9	0
Neonectria coccinea CBS 119158	Prot_2541	PF13450.1	NAD_binding_8	4.8e-06	21.7	0.3
Neonectria coccinea CBS 119158	Prot_2631	PF13450.1	NAD_binding_8	6.3e-06	21.3	0
Neonectria coccinea CBS 119158	Prot_1589	PF13450.1	NAD_binding_8	3.6e-05	18.9	0.1
Neonectria coccinea CBS 119158	Prot_12163	PF13450.1	NAD_binding_8	0.00018	16.6	0.1
Neonectria coccinea CBS 119158	Prot_5325	PF13450.1	NAD_binding_8	0.00016	16.8	0.1
Neonectria coccinea CBS 119158	Prot_12464	PF13450.1	NAD_binding_8	0.00021	16.4	0.1
Neonectria coccinea CBS 119158	Prot_7690	PF13450.1	NAD_binding_8	0.00073	14.7	0.1
Neonectria coccinea CBS 119158	Prot_10338	PF13450.1	NAD_binding_8	0.00095	14.3	0.7
Neonectria coccinea CBS 119158	Prot_7353	PF13450.1	NAD_binding_8	0.00091	14.4	0
Neonectria coccinea CBS 119158	Prot_3194	PF13450.1	NAD_binding_8	0.001	14.2	0
Neonectria coccinea CBS 119158	Prot_5325	PF13454.1	NAD_binding_9	0.0019	13.1	0
Neonectria coccinea CBS 119158	Prot_1288	PF13454.1	NAD_binding_9	5.9e-06	21.2	0
Neonectria coccinea CBS 119158	Prot_591	PF13454.1	NAD_binding_9	0.01	10.7	0
Neonectria coccinea CBS 119158	Prot_12464	PF13454.1	NAD_binding_9	0.0042	12	0
Neonectria coccinea CBS 119158	Prot_9436	PF01210.18	NAD_Gly3P_dh_N	0.0075	11.1	0.1
Neonectria coccinea CBS 119158	Prot_3194	PF01210.18	NAD_Gly3P_dh_N	0.0098	10.7	0
Neonectria coccinea CBS 119158	Prot_7548	PF03892.9	NapB	0.0032	12.3	0.3
Neonectria coccinea CBS 119158	Prot_4549	PF03096.9	Ndr	2.5e-07	24.5	0
Neonectria coccinea CBS 119158	Prot_7920	PF14465.1	NFRKB_winged	0.045	8.7	0
Neonectria coccinea CBS 119158	Prot_8529	PF01436.16	NHL	0.4	6	0
Neonectria coccinea CBS 119158	Prot_6767	PF01436.16	NHL	1.4	4.2	0
Neonectria coccinea CBS 119158	Prot_879	PF05450.10	Nicastrin	0.0026	12.1	0.1
Neonectria coccinea CBS 119158	Prot_1779	PF10126.4	Nit_Regul_Hom	0.013	10.4	0
Neonectria coccinea CBS 119158	Prot_8126	PF06524.7	NOA36	0.058	7.7	4.9
Neonectria coccinea CBS 119158	Prot_11030	PF06524.7	NOA36	2.6	2.3	13.8
Neonectria coccinea CBS 119158	Prot_2684	PF07127.6	Nodulin_late	0.074	8.4	4
Neonectria coccinea CBS 119158	Prot_11030	PF04147.7	Nop14	0.027	7.4	13.3
Neonectria coccinea CBS 119158	Prot_353	PF04147.7	Nop14	0.14	5.1	10.3
Neonectria coccinea CBS 119158	Prot_10550	PF04147.7	Nop14	0.48	3.3	15.3
Neonectria coccinea CBS 119158	Prot_9505	PF04147.7	Nop14	2	1.3	12.3
Neonectria coccinea CBS 119158	Prot_5743	PF04147.7	Nop14	2.4	1	19.9
Neonectria coccinea CBS 119158	Prot_1327	PF05630.6	NPP1	1.8e-62	205.8	0
Neonectria coccinea CBS 119158	Prot_6556	PF03666.8	NPR3	0.052	7.1	8.9
Neonectria coccinea CBS 119158	Prot_2252	PF03666.8	NPR3	0.33	4.5	5.3
Neonectria coccinea CBS 119158	Prot_353	PF03666.8	NPR3	0.75	3.3	7.5
Neonectria coccinea CBS 119158	Prot_3058	PF03666.8	NPR3	1.6	2.2	8.4
Neonectria coccinea CBS 119158	Prot_5743	PF03666.8	NPR3	15	-1	14.4
Neonectria coccinea CBS 119158	Prot_5002	PF07463.6	NUMOD4	0.0096	11	0
Neonectria coccinea CBS 119158	Prot_7314	PF06516.6	NUP	1.4e-121	400.2	0
Neonectria coccinea CBS 119158	Prot_80	PF01516.11	Orbi_VP6	0.011	9.9	6
Neonectria coccinea CBS 119158	Prot_8984	PF00420.19	Oxidored_q2	0.0065	11.2	0
Neonectria coccinea CBS 119158	Prot_8313	PF12669.2	FeoB_associated	0.016	10.6	0.2
Neonectria coccinea CBS 119158	Prot_1878	PF00067.17	p450	2.5e-68	225.7	0
Neonectria coccinea CBS 119158	Prot_5209	PF00067.17	p450	5.8e-45	148.7	0
Neonectria coccinea CBS 119158	Prot_2279	PF14748.1	P5CR_dimer	1.5e-15	52.2	0
Neonectria coccinea CBS 119158	Prot_8442	PF07691.7	PA14	1.2e-09	33.1	0.1
Neonectria coccinea CBS 119158	Prot_8442	PF10528.4	GLEYA	3e-12	41.6	0.1
Neonectria coccinea CBS 119158	Prot_6753	PF04636.8	PA26	0.7	3.6	11.9
Neonectria coccinea CBS 119158	Prot_10369	PF08223.6	PaaX_C	0.0031	12.3	0
Neonectria coccinea CBS 119158	Prot_11239	PF03068.10	PAD	2.7e-39	129.7	0
Neonectria coccinea CBS 119158	Prot_6632	PF03403.8	PAF-AH_p_II	6.4e-12	39.5	0
Neonectria coccinea CBS 119158	Prot_914	PF03403.8	PAF-AH_p_II	1.9e-08	28.1	0
Neonectria coccinea CBS 119158	Prot_1497	PF03403.8	PAF-AH_p_II	0.022	8.1	0
Neonectria coccinea CBS 119158	Prot_1734	PF00024.21	PAN_1	1.1e-06	23.4	0.2
Neonectria coccinea CBS 119158	Prot_11368	PF00024.21	PAN_1	6.9e-05	17.7	6.4
Neonectria coccinea CBS 119158	Prot_6221	PF00024.21	PAN_1	4.6e-06	21.5	1
Neonectria coccinea CBS 119158	Prot_5430	PF00024.21	PAN_1	1.2e-06	23.3	0.1
Neonectria coccinea CBS 119158	Prot_11285	PF00024.21	PAN_1	7.7e-06	20.7	1
Neonectria coccinea CBS 119158	Prot_1794	PF00024.21	PAN_1	2.7e-05	19	2
Neonectria coccinea CBS 119158	Prot_10767	PF00024.21	PAN_1	0.00018	16.4	0
Neonectria coccinea CBS 119158	Prot_2715	PF00024.21	PAN_1	0.0028	12.5	0.1
Neonectria coccinea CBS 119158	Prot_4266	PF08276.6	PAN_2	0.0013	13.6	0.6
Neonectria coccinea CBS 119158	Prot_8884	PF08276.6	PAN_2	3.9e-06	21.8	0.3
Neonectria coccinea CBS 119158	Prot_5430	PF08276.6	PAN_2	0.00031	15.7	0.4
Neonectria coccinea CBS 119158	Prot_11285	PF08276.6	PAN_2	0.00073	14.5	0
Neonectria coccinea CBS 119158	Prot_4183	PF08276.6	PAN_2	0.0022	13	3
Neonectria coccinea CBS 119158	Prot_1794	PF08276.6	PAN_2	0.0033	12.4	0.5
Neonectria coccinea CBS 119158	Prot_7072	PF08276.6	PAN_2	0.0047	11.9	3
Neonectria coccinea CBS 119158	Prot_11368	PF08276.6	PAN_2	0.044	8.8	1.4
Neonectria coccinea CBS 119158	Prot_9014	PF08277.7	PAN_3	7.2e-06	20.7	0.2
Neonectria coccinea CBS 119158	Prot_1734	PF08277.7	PAN_3	0.023	9.5	0.2
Neonectria coccinea CBS 119158	Prot_6221	PF08277.7	PAN_3	0.00053	14.7	0.7
Neonectria coccinea CBS 119158	Prot_4266	PF08277.7	PAN_3	0.00016	16.4	0.3
Neonectria coccinea CBS 119158	Prot_2715	PF08277.7	PAN_3	0.00053	14.7	0
Neonectria coccinea CBS 119158	Prot_7072	PF08277.7	PAN_3	0.00049	14.8	2.6
Neonectria coccinea CBS 119158	Prot_11285	PF08277.7	PAN_3	0.0023	12.7	0.1
Neonectria coccinea CBS 119158	Prot_5430	PF08277.7	PAN_3	0.0059	11.4	0.3
Neonectria coccinea CBS 119158	Prot_11368	PF08277.7	PAN_3	0.039	8.7	2
Neonectria coccinea CBS 119158	Prot_4266	PF14295.1	PAN_4	3.5e-05	18.6	1.3
Neonectria coccinea CBS 119158	Prot_1734	PF14295.1	PAN_4	1.3e-05	20	0.9
Neonectria coccinea CBS 119158	Prot_7072	PF14295.1	PAN_4	4.6e-06	21.4	1.1
Neonectria coccinea CBS 119158	Prot_6221	PF14295.1	PAN_4	0.00096	14	1.5
Neonectria coccinea CBS 119158	Prot_1794	PF14295.1	PAN_4	1.4e-05	19.8	0.2
Neonectria coccinea CBS 119158	Prot_8884	PF14295.1	PAN_4	2.8e-05	18.9	0.2
Neonectria coccinea CBS 119158	Prot_11285	PF14295.1	PAN_4	4.2e-05	18.3	0.1
Neonectria coccinea CBS 119158	Prot_5430	PF14295.1	PAN_4	0.00036	15.4	1.4
Neonectria coccinea CBS 119158	Prot_9769	PF14295.1	PAN_4	0.0012	13.7	0.7
Neonectria coccinea CBS 119158	Prot_2715	PF14295.1	PAN_4	0.0018	13.1	0.1
Neonectria coccinea CBS 119158	Prot_11368	PF14295.1	PAN_4	0.014	10.3	4.5
Neonectria coccinea CBS 119158	Prot_7937	PF09770.4	PAT1	6	0	17.1
Neonectria coccinea CBS 119158	Prot_11285	PF14812.1	PBP1_TM	0.089	8.3	5.4
Neonectria coccinea CBS 119158	Prot_3641	PF07676.7	PD40	8.1e-08	26.9	0.2
Neonectria coccinea CBS 119158	Prot_12795	PF08237.6	PE-PPE	3.8e-07	24.8	0
Neonectria coccinea CBS 119158	Prot_1844	PF08237.6	PE-PPE	3.7e-07	24.9	0.2
Neonectria coccinea CBS 119158	Prot_9089	PF08237.6	PE-PPE	1.5e-06	22.8	0.1
Neonectria coccinea CBS 119158	Prot_11025	PF08237.6	PE-PPE	7.2e-06	20.7	0.2
Neonectria coccinea CBS 119158	Prot_6528	PF08237.6	PE-PPE	0.00014	16.4	0
Neonectria coccinea CBS 119158	Prot_5258	PF03211.8	Pectate_lyase	1.8e-80	264.4	7.5
Neonectria coccinea CBS 119158	Prot_1674	PF03211.8	Pectate_lyase	8.5e-77	252.5	6.5
Neonectria coccinea CBS 119158	Prot_8730	PF03211.8	Pectate_lyase	7.4e-68	223.2	9.3
Neonectria coccinea CBS 119158	Prot_3641	PF14583.1	Pectate_lyase22	0.0031	11.1	0.1
Neonectria coccinea CBS 119158	Prot_4230	PF12708.2	Pectate_lyase_3	6.6e-68	224.3	6.3
Neonectria coccinea CBS 119158	Prot_2642	PF12708.2	Pectate_lyase_3	1.7e-61	203.3	2
Neonectria coccinea CBS 119158	Prot_12259	PF12708.2	Pectate_lyase_3	3.7e-59	195.7	1.4
Neonectria coccinea CBS 119158	Prot_1861	PF12708.2	Pectate_lyase_3	1.5e-11	40	0.4
Neonectria coccinea CBS 119158	Prot_10340	PF12708.2	Pectate_lyase_3	1e-08	30.7	7.6
Neonectria coccinea CBS 119158	Prot_2557	PF12708.2	Pectate_lyase_3	1.4e-07	27	3.1
Neonectria coccinea CBS 119158	Prot_8959	PF01095.14	Pectinesterase	6.5e-45	148	4.6
Neonectria coccinea CBS 119158	Prot_1877	PF01095.14	Pectinesterase	3e-45	149.1	0.3
Neonectria coccinea CBS 119158	Prot_1854	PF01095.14	Pectinesterase	3.6e-27	89.8	0.1
Neonectria coccinea CBS 119158	Prot_10406	PF00544.14	Pec_lyase_C	6.8e-23	76.3	4.8
Neonectria coccinea CBS 119158	Prot_8078	PF00544.14	Pec_lyase_C	2e-22	74.7	9
Neonectria coccinea CBS 119158	Prot_2504	PF00544.14	Pec_lyase_C	3.2e-20	67.5	7.8
Neonectria coccinea CBS 119158	Prot_1726	PF00544.14	Pec_lyase_C	5.3e-17	57	0.5
Neonectria coccinea CBS 119158	Prot_6139	PF00544.14	Pec_lyase_C	0.00045	14.8	4.3
Neonectria coccinea CBS 119158	Prot_3286	PF13706.1	PepSY_TM	0.0058	11.2	0.1
Neonectria coccinea CBS 119158	Prot_8120	PF01650.13	Peptidase_C13	3e-37	123.4	0.2
Neonectria coccinea CBS 119158	Prot_1948	PF03577.10	Peptidase_C69	2.9e-26	87.3	0
Neonectria coccinea CBS 119158	Prot_10629	PF00413.19	Peptidase_M10	0.00097	14	1
Neonectria coccinea CBS 119158	Prot_8294	PF00413.19	Peptidase_M10	0.00065	14.6	0
Neonectria coccinea CBS 119158	Prot_5562	PF00413.19	Peptidase_M10	0.00095	14	0
Neonectria coccinea CBS 119158	Prot_12751	PF00246.19	Peptidase_M14	7.7e-72	237.3	0
Neonectria coccinea CBS 119158	Prot_4689	PF00246.19	Peptidase_M14	1.9e-67	222.9	0
Neonectria coccinea CBS 119158	Prot_9105	PF00246.19	Peptidase_M14	4.2e-45	149.6	0.3
Neonectria coccinea CBS 119158	Prot_7775	PF00246.19	Peptidase_M14	1.9e-38	127.8	0
Neonectria coccinea CBS 119158	Prot_5348	PF00246.19	Peptidase_M14	2.1e-38	127.6	0
Neonectria coccinea CBS 119158	Prot_1792	PF01244.16	Peptidase_M19	0.0026	11.8	0
Neonectria coccinea CBS 119158	Prot_52	PF01546.23	Peptidase_M20	1.3e-25	85.1	0.2
Neonectria coccinea CBS 119158	Prot_879	PF01546.23	Peptidase_M20	2.4e-07	25.6	0
Neonectria coccinea CBS 119158	Prot_9626	PF01546.23	Peptidase_M20	4.5e-06	21.4	0
Neonectria coccinea CBS 119158	Prot_879	PF04389.12	Peptidase_M28	5.1e-37	122.4	0.1
Neonectria coccinea CBS 119158	Prot_9626	PF04389.12	Peptidase_M28	8e-27	89.2	0
Neonectria coccinea CBS 119158	Prot_52	PF04389.12	Peptidase_M28	5.3e-05	18.1	0.1
Neonectria coccinea CBS 119158	Prot_9855	PF02102.10	Peptidase_M35	7.4e-78	256.7	10.6
Neonectria coccinea CBS 119158	Prot_52	PF05343.9	Peptidase_M42	0.00018	15.4	0.3
Neonectria coccinea CBS 119158	Prot_9626	PF05343.9	Peptidase_M42	0.3	4.9	0
Neonectria coccinea CBS 119158	Prot_8294	PF05572.8	Peptidase_M43	4.4e-15	50.7	0
Neonectria coccinea CBS 119158	Prot_5562	PF05572.8	Peptidase_M43	1.5e-12	42.5	0.1
Neonectria coccinea CBS 119158	Prot_8436	PF09471.5	Peptidase_M64	0.0018	13	0.1
Neonectria coccinea CBS 119158	Prot_10629	PF10462.4	Peptidase_M66	0.00029	14.8	1.3
Neonectria coccinea CBS 119158	Prot_8294	PF10462.4	Peptidase_M66	0.0068	10.4	0.1
Neonectria coccinea CBS 119158	Prot_5354	PF13485.1	Peptidase_MA_2	2e-06	23	1.2
Neonectria coccinea CBS 119158	Prot_5908	PF00450.17	Peptidase_S10	2.9e-97	321.5	0
Neonectria coccinea CBS 119158	Prot_5513	PF00450.17	Peptidase_S10	6.5e-84	277.5	0.1
Neonectria coccinea CBS 119158	Prot_10203	PF00450.17	Peptidase_S10	4.5e-77	255	0.2
Neonectria coccinea CBS 119158	Prot_1507	PF00450.17	Peptidase_S10	1.2e-59	197.5	4.2
Neonectria coccinea CBS 119158	Prot_12164	PF02129.13	Peptidase_S15	2.7e-05	18.8	1.2
Neonectria coccinea CBS 119158	Prot_1497	PF02129.13	Peptidase_S15	0.00023	15.7	0.1
Neonectria coccinea CBS 119158	Prot_9248	PF02129.13	Peptidase_S15	0.00032	15.3	0
Neonectria coccinea CBS 119158	Prot_2881	PF03572.13	Peptidase_S41	5.6e-06	21	0
Neonectria coccinea CBS 119158	Prot_320	PF08192.6	Peptidase_S64	0.38	4.1	13.9
Neonectria coccinea CBS 119158	Prot_6556	PF08192.6	Peptidase_S64	4.6	0.5	15.9
Neonectria coccinea CBS 119158	Prot_8978	PF00082.17	Peptidase_S8	1.8e-49	163.4	17.2
Neonectria coccinea CBS 119158	Prot_8274	PF00082.17	Peptidase_S8	2.3e-47	156.5	10.4
Neonectria coccinea CBS 119158	Prot_8435	PF00082.17	Peptidase_S8	2.9e-46	152.9	1
Neonectria coccinea CBS 119158	Prot_9262	PF00082.17	Peptidase_S8	6.4e-46	151.8	13.2
Neonectria coccinea CBS 119158	Prot_4742	PF00082.17	Peptidase_S8	2.6e-44	146.5	18.9
Neonectria coccinea CBS 119158	Prot_9134	PF00082.17	Peptidase_S8	8.1e-41	135.1	15.3
Neonectria coccinea CBS 119158	Prot_2574	PF00082.17	Peptidase_S8	5.3e-10	34	0.3
Neonectria coccinea CBS 119158	Prot_6718	PF00326.16	Peptidase_S9	2.4e-37	123.3	1.3
Neonectria coccinea CBS 119158	Prot_6565	PF00326.16	Peptidase_S9	5.5e-06	20.8	0
Neonectria coccinea CBS 119158	Prot_1497	PF00326.16	Peptidase_S9	5.8e-05	17.5	0
Neonectria coccinea CBS 119158	Prot_3235	PF00326.16	Peptidase_S9	0.039	8.2	0
Neonectria coccinea CBS 119158	Prot_3815	PF00326.16	Peptidase_S9	0.0012	13.2	0.1
Neonectria coccinea CBS 119158	Prot_12164	PF00326.16	Peptidase_S9	0.022	9.1	0.1
Neonectria coccinea CBS 119158	Prot_4549	PF00326.16	Peptidase_S9	0.037	8.3	0
Neonectria coccinea CBS 119158	Prot_5947	PF00326.16	Peptidase_S9	0.0033	11.8	0.7
Neonectria coccinea CBS 119158	Prot_7345	PF00141.18	peroxidase	1.1e-48	160.8	0
Neonectria coccinea CBS 119158	Prot_5238	PF00141.18	peroxidase	6.1e-25	83.1	0.1
Neonectria coccinea CBS 119158	Prot_7944	PF04695.8	PEX14_N	0.0049	12	0.9
Neonectria coccinea CBS 119158	Prot_10767	PF04695.8	PEX14_N	0.043	9	0.3
Neonectria coccinea CBS 119158	Prot_8313	PF04695.8	PEX14_N	0.056	8.6	5.9
Neonectria coccinea CBS 119158	Prot_7548	PF04695.8	PEX14_N	0.24	6.5	0.2
Neonectria coccinea CBS 119158	Prot_4570	PF10333.4	Pga1	0.00026	15.8	0
Neonectria coccinea CBS 119158	Prot_4549	PF07819.8	PGAP1	7.3e-05	17.5	0
Neonectria coccinea CBS 119158	Prot_9089	PF07819.8	PGAP1	0.00011	16.9	0
Neonectria coccinea CBS 119158	Prot_3235	PF07819.8	PGAP1	0.0068	11.1	0
Neonectria coccinea CBS 119158	Prot_1779	PF09587.5	PGA_cap	0.00094	13.7	0
Neonectria coccinea CBS 119158	Prot_1183	PF05371.7	Phage_Coat_Gp8	0.0084	10.8	0.1
Neonectria coccinea CBS 119158	Prot_12422	PF10746.4	Phage_holin_2_2	0.0056	11.5	0
Neonectria coccinea CBS 119158	Prot_7547	PF00959.14	Phage_lysozyme	1.1e-14	49.8	0
Neonectria coccinea CBS 119158	Prot_8093	PF05489.7	Phage_tail_X	0.089	7.5	0
Neonectria coccinea CBS 119158	Prot_12863	PF01663.17	Phosphodiest	5.7e-08	27.5	0.3
Neonectria coccinea CBS 119158	Prot_5379	PF09056.6	Phospholip_A2_3	1.7e-45	149	0.2
Neonectria coccinea CBS 119158	Prot_89	PF02333.10	Phytase	1.9e-57	189.8	0.1
Neonectria coccinea CBS 119158	Prot_6556	PF08190.7	PIH1	2.1	2.8	16.6
Neonectria coccinea CBS 119158	Prot_10797	PF00399.14	PIR	0.00017	16	0.2
Neonectria coccinea CBS 119158	Prot_12849	PF01735.13	PLA2_B	6.1e-189	623.3	1.1
Neonectria coccinea CBS 119158	Prot_7944	PF05795.6	Plasmodium_Vir	0.00016	16.1	1.3
Neonectria coccinea CBS 119158	Prot_8571	PF05795.6	Plasmodium_Vir	0.077	7.2	7.9
Neonectria coccinea CBS 119158	Prot_6823	PF05795.6	Plasmodium_Vir	1.1	3.5	8.3
Neonectria coccinea CBS 119158	Prot_6661	PF13231.1	PMT_2	0.0049	11.9	0
Neonectria coccinea CBS 119158	Prot_8313	PF05808.6	Podoplanin	1.8e-05	19.5	11.9
Neonectria coccinea CBS 119158	Prot_6661	PF05808.6	Podoplanin	3.7e-05	18.5	0.6
Neonectria coccinea CBS 119158	Prot_7944	PF05808.6	Podoplanin	0.05	8.2	9.7
Neonectria coccinea CBS 119158	Prot_6823	PF05808.6	Podoplanin	0.0039	11.9	7.5
Neonectria coccinea CBS 119158	Prot_5541	PF01357.16	Pollen_allerg_1	8e-06	20.8	1.1
Neonectria coccinea CBS 119158	Prot_11249	PF01620.11	Pollen_allerg_2	0.013	10.9	1.7
Neonectria coccinea CBS 119158	Prot_7980	PF01522.16	Polysacc_deac_1	4.8e-30	98.9	0
Neonectria coccinea CBS 119158	Prot_7168	PF01522.16	Polysacc_deac_1	6.7e-16	53.2	0
Neonectria coccinea CBS 119158	Prot_10203	PF04151.10	PPC	0.03	10.5	0
Neonectria coccinea CBS 119158	Prot_1952	PF01535.15	PPR	0.03	9.6	0
Neonectria coccinea CBS 119158	Prot_11080	PF01011.16	PQQ	0.069	7.9	0
Neonectria coccinea CBS 119158	Prot_11080	PF13360.1	PQQ_2	2.6e-17	58.1	3
Neonectria coccinea CBS 119158	Prot_2502	PF10253.4	PRCC	0.016	11	2.8
Neonectria coccinea CBS 119158	Prot_1288	PF07156.9	Prenylcys_lyase	1.1e-20	68.9	0
Neonectria coccinea CBS 119158	Prot_3286	PF06798.7	PrkA	0.0022	12.4	0
Neonectria coccinea CBS 119158	Prot_2574	PF09286.6	Pro-kuma_activ	1.5e-36	120.7	0
Neonectria coccinea CBS 119158	Prot_4126	PF05478.6	Prominin	0.057	6	0.1
Neonectria coccinea CBS 119158	Prot_12751	PF02244.11	Propep_M14	0.00031	15.5	0
Neonectria coccinea CBS 119158	Prot_3641	PF10584.4	Proteasome_A_N	0.14	6.7	0
Neonectria coccinea CBS 119158	Prot_866	PF07583.6	PSCyt2	0.0051	11.4	0.1
Neonectria coccinea CBS 119158	Prot_7430	PF01241.13	PSI_PSAK	0.01	11	0.6
Neonectria coccinea CBS 119158	Prot_10322	PF04886.7	PT	4.6e-06	21	9.8
Neonectria coccinea CBS 119158	Prot_9436	PF00070.22	Pyr_redox	0.0016	13.9	1
Neonectria coccinea CBS 119158	Prot_591	PF00070.22	Pyr_redox	4.5e-05	18.9	0
Neonectria coccinea CBS 119158	Prot_1579	PF00070.22	Pyr_redox	1.7e-05	20.3	0.5
Neonectria coccinea CBS 119158	Prot_3194	PF00070.22	Pyr_redox	3.2e-05	19.4	0.9
Neonectria coccinea CBS 119158	Prot_2541	PF00070.22	Pyr_redox	0.00079	15	0.5
Neonectria coccinea CBS 119158	Prot_2631	PF00070.22	Pyr_redox	0.011	11.2	0.1
Neonectria coccinea CBS 119158	Prot_5325	PF07992.9	Pyr_redox_2	1.1e-16	56.4	0
Neonectria coccinea CBS 119158	Prot_1579	PF07992.9	Pyr_redox_2	2.1e-08	29.4	0.3
Neonectria coccinea CBS 119158	Prot_2541	PF07992.9	Pyr_redox_2	4.5e-07	25	0.1
Neonectria coccinea CBS 119158	Prot_9436	PF07992.9	Pyr_redox_2	2.7e-07	25.7	0.1
Neonectria coccinea CBS 119158	Prot_591	PF07992.9	Pyr_redox_2	1.2e-05	20.4	0.1
Neonectria coccinea CBS 119158	Prot_12163	PF07992.9	Pyr_redox_2	1.5e-05	20	0
Neonectria coccinea CBS 119158	Prot_1288	PF07992.9	Pyr_redox_2	0.00055	15	0.1
Neonectria coccinea CBS 119158	Prot_12464	PF07992.9	Pyr_redox_2	0.0069	11.4	0
Neonectria coccinea CBS 119158	Prot_7353	PF07992.9	Pyr_redox_2	7.1e-05	17.8	0
Neonectria coccinea CBS 119158	Prot_7690	PF07992.9	Pyr_redox_2	0.0013	13.7	0
Neonectria coccinea CBS 119158	Prot_10338	PF07992.9	Pyr_redox_2	0.0027	12.7	0
Neonectria coccinea CBS 119158	Prot_1589	PF07992.9	Pyr_redox_2	0.0019	13.2	0.1
Neonectria coccinea CBS 119158	Prot_3194	PF07992.9	Pyr_redox_2	0.0024	12.9	0
Neonectria coccinea CBS 119158	Prot_591	PF13738.1	Pyr_redox_3	1e-05	20.8	0
Neonectria coccinea CBS 119158	Prot_2631	PF13738.1	Pyr_redox_3	0.00063	14.9	0
Neonectria coccinea CBS 119158	Prot_5325	PF13738.1	Pyr_redox_3	0.0018	13.5	0
Neonectria coccinea CBS 119158	Prot_7353	PF13738.1	Pyr_redox_3	3.6e-06	22.3	0
Neonectria coccinea CBS 119158	Prot_1579	PF13738.1	Pyr_redox_3	6.9e-07	24.6	0.6
Neonectria coccinea CBS 119158	Prot_12464	PF13738.1	Pyr_redox_3	0.0044	12.2	0
Neonectria coccinea CBS 119158	Prot_1288	PF13738.1	Pyr_redox_3	6.6e-05	18.1	0
Neonectria coccinea CBS 119158	Prot_2541	PF13738.1	Pyr_redox_3	0.0032	12.7	0
Neonectria coccinea CBS 119158	Prot_9436	PF13738.1	Pyr_redox_3	0.00025	16.2	0
Neonectria coccinea CBS 119158	Prot_1589	PF13738.1	Pyr_redox_3	0.0013	14	0
Neonectria coccinea CBS 119158	Prot_10338	PF13738.1	Pyr_redox_3	0.011	10.9	0.1
Neonectria coccinea CBS 119158	Prot_3194	PF13738.1	Pyr_redox_3	0.0028	12.8	0
Neonectria coccinea CBS 119158	Prot_12163	PF13738.1	Pyr_redox_3	0.051	8.7	0
Neonectria coccinea CBS 119158	Prot_6146	PF14930.1	Qn_am_d_aII	0.011	10.9	0
Neonectria coccinea CBS 119158	Prot_6661	PF07218.6	RAP1	0.074	6.2	6.9
Neonectria coccinea CBS 119158	Prot_8571	PF07218.6	RAP1	0.67	3	9.9
Neonectria coccinea CBS 119158	Prot_7994	PF07218.6	RAP1	0.95	2.5	9.8
Neonectria coccinea CBS 119158	Prot_12598	PF07218.6	RAP1	2.4	1.2	15.1
Neonectria coccinea CBS 119158	Prot_8390	PF12768.2	Rax2	0.00033	15	0
Neonectria coccinea CBS 119158	Prot_6661	PF12768.2	Rax2	0.00044	14.6	0
Neonectria coccinea CBS 119158	Prot_8390	PF01030.19	Recep_L_domain	0.00099	14.2	0
Neonectria coccinea CBS 119158	Prot_9723	PF07964.6	Red1	1.8	1.6	8.2
Neonectria coccinea CBS 119158	Prot_12492	PF08534.5	Redoxin	0.00042	15	0
Neonectria coccinea CBS 119158	Prot_5562	PF13574.1	Reprolysin_2	1.4e-05	20.3	0
Neonectria coccinea CBS 119158	Prot_8294	PF13574.1	Reprolysin_2	1.2e-05	20.6	0
Neonectria coccinea CBS 119158	Prot_10629	PF13574.1	Reprolysin_2	6.9e-05	18.1	0
Neonectria coccinea CBS 119158	Prot_8436	PF13574.1	Reprolysin_2	0.0024	13.1	0.4
Neonectria coccinea CBS 119158	Prot_5562	PF13582.1	Reprolysin_3	2.1e-07	26.6	0
Neonectria coccinea CBS 119158	Prot_8294	PF13582.1	Reprolysin_3	6.1e-05	18.7	0
Neonectria coccinea CBS 119158	Prot_10629	PF13582.1	Reprolysin_3	0.0012	14.5	0
Neonectria coccinea CBS 119158	Prot_8436	PF13582.1	Reprolysin_3	0.0015	14.2	0.3
Neonectria coccinea CBS 119158	Prot_5562	PF13583.1	Reprolysin_4	2.5e-07	25.5	0
Neonectria coccinea CBS 119158	Prot_10629	PF13583.1	Reprolysin_4	2.3e-06	22.3	0.1
Neonectria coccinea CBS 119158	Prot_8294	PF13583.1	Reprolysin_4	0.00026	15.7	0.1
Neonectria coccinea CBS 119158	Prot_5562	PF13688.1	Reprolysin_5	1.7e-08	29.7	0
Neonectria coccinea CBS 119158	Prot_10629	PF13688.1	Reprolysin_5	2.5e-05	19.4	0.2
Neonectria coccinea CBS 119158	Prot_8294	PF13688.1	Reprolysin_5	7.6e-05	17.8	0.1
Neonectria coccinea CBS 119158	Prot_8436	PF13688.1	Reprolysin_5	0.0029	12.6	0.6
Neonectria coccinea CBS 119158	Prot_11590	PF05140.9	ResB	0.0038	10.9	0.1
Neonectria coccinea CBS 119158	Prot_1882	PF03732.12	Retrotrans_gag	0.0016	13.7	0.1
Neonectria coccinea CBS 119158	Prot_7921	PF04589.8	RFX1_trans_act	0.037	8.9	0.6
Neonectria coccinea CBS 119158	Prot_4545	PF09284.5	RhgB_N	2.1e-98	323.7	9.8
Neonectria coccinea CBS 119158	Prot_9331	PF09284.5	RhgB_N	2.7e-72	238.2	3.8
Neonectria coccinea CBS 119158	Prot_9723	PF12721.2	RHIM	1.1	4.9	7.4
Neonectria coccinea CBS 119158	Prot_6177	PF00545.15	Ribonuclease	4.9e-22	73	0.1
Neonectria coccinea CBS 119158	Prot_12890	PF00445.13	Ribonuclease_T2	8.3e-46	151.1	1.3
Neonectria coccinea CBS 119158	Prot_9294	PF00428.14	Ribosomal_60s	0.0023	13.4	2.6
Neonectria coccinea CBS 119158	Prot_8478	PF02267.12	Rib_hydrolayse	0.0064	10.9	0
Neonectria coccinea CBS 119158	Prot_6823	PF02009.11	RIFIN	0.0016	13.2	2.9
Neonectria coccinea CBS 119158	Prot_2382	PF02009.11	RIFIN	0.044	8.5	10.7
Neonectria coccinea CBS 119158	Prot_11030	PF08208.6	RNA_polI_A34	0.1	7.3	7.4
Neonectria coccinea CBS 119158	Prot_7944	PF05132.9	RNA_pol_Rpc4	0.038	9.1	2.4
Neonectria coccinea CBS 119158	Prot_12163	PF10727.4	Rossmann-like	0.0039	12	0
Neonectria coccinea CBS 119158	Prot_9294	PF13145.1	Rotamase_2	0.053	9.3	0.8
Neonectria coccinea CBS 119158	Prot_6556	PF06459.7	RR_TM4-6	3.7	2.4	16.3
Neonectria coccinea CBS 119158	Prot_11679	PF09510.5	Rtt102p	0.0015	13.6	0
Neonectria coccinea CBS 119158	Prot_1882	PF00665.21	rve	9.1e-16	53.2	0
Neonectria coccinea CBS 119158	Prot_1882	PF00077.15	RVP	0.011	10.8	0
Neonectria coccinea CBS 119158	Prot_1882	PF00078.22	RVT_1	2.2e-26	87.6	0
Neonectria coccinea CBS 119158	Prot_7430	PF02265.11	S1-P1_nuclease	4.3e-69	228	0
Neonectria coccinea CBS 119158	Prot_3058	PF04499.10	SASP	0.23	5.1	5.8
Neonectria coccinea CBS 119158	Prot_353	PF04499.10	SASP	0.81	3.3	8
Neonectria coccinea CBS 119158	Prot_5002	PF01547.20	SBP_bac_1	0.00015	16.7	0.1
Neonectria coccinea CBS 119158	Prot_5002	PF13531.1	SBP_bac_11	0.00052	14.8	0.6
Neonectria coccinea CBS 119158	Prot_5002	PF13416.1	SBP_bac_8	0.00045	15.1	0.1
Neonectria coccinea CBS 119158	Prot_10550	PF05285.7	SDA1	7.6	0.8	15.1
Neonectria coccinea CBS 119158	Prot_8982	PF05285.7	SDA1	8	0.7	21.4
Neonectria coccinea CBS 119158	Prot_9436	PF08491.5	SE	0.00024	15.1	0
Neonectria coccinea CBS 119158	Prot_12422	PF14797.1	SEEEED	0.024	9.9	6.4
Neonectria coccinea CBS 119158	Prot_10830	PF08238.7	Sel1	2.7e-07	26.2	0.1
Neonectria coccinea CBS 119158	Prot_10550	PF04360.7	Serglycin	0.0031	12.4	0.4
Neonectria coccinea CBS 119158	Prot_4766	PF04360.7	Serglycin	0.003	12.4	4.1
Neonectria coccinea CBS 119158	Prot_4126	PF02403.17	Seryl_tRNA_N	0.021	10	0.1
Neonectria coccinea CBS 119158	Prot_3937	PF08450.7	SGL	3.1e-08	28.4	0.3
Neonectria coccinea CBS 119158	Prot_1882	PF08450.7	SGL	2.5e-06	22.1	0
Neonectria coccinea CBS 119158	Prot_8529	PF08450.7	SGL	0.012	10	0
Neonectria coccinea CBS 119158	Prot_5482	PF08450.7	SGL	0.0001	16.8	0.1
Neonectria coccinea CBS 119158	Prot_1288	PF01488.15	Shikimate_DH	0.0033	12.6	0.1
Neonectria coccinea CBS 119158	Prot_2143	PF01488.15	Shikimate_DH	0.01	11.1	0.1
Neonectria coccinea CBS 119158	Prot_3058	PF04546.8	Sigma70_ner	0.036	8.8	5.8
Neonectria coccinea CBS 119158	Prot_7780	PF04546.8	Sigma70_ner	0.22	6.2	2.4
Neonectria coccinea CBS 119158	Prot_4126	PF05565.6	Shipo_gp157	0.0034	12.1	0.1
Neonectria coccinea CBS 119158	Prot_571	PF08693.5	SKG6	4.2e-08	27.6	0.3
Neonectria coccinea CBS 119158	Prot_6823	PF08693.5	SKG6	3.6e-08	27.8	0.3
Neonectria coccinea CBS 119158	Prot_8390	PF08693.5	SKG6	6.5e-07	23.7	2.1
Neonectria coccinea CBS 119158	Prot_11590	PF08693.5	SKG6	4.5e-07	24.3	0
Neonectria coccinea CBS 119158	Prot_9930	PF08693.5	SKG6	3.6e-05	18.1	0.5
Neonectria coccinea CBS 119158	Prot_8313	PF08693.5	SKG6	0.00089	13.7	1.2
Neonectria coccinea CBS 119158	Prot_11254	PF08693.5	SKG6	0.0013	13.2	0.6
Neonectria coccinea CBS 119158	Prot_3679	PF03935.10	SKN1	2.1e-06	21.2	0.2
Neonectria coccinea CBS 119158	Prot_2544	PF03935.10	SKN1	0.00018	14.9	0
Neonectria coccinea CBS 119158	Prot_2746	PF03935.10	SKN1	0.0004	13.7	0.1
Neonectria coccinea CBS 119158	Prot_2516	PF15279.1	SOBP	19	0.6	20.3
Neonectria coccinea CBS 119158	Prot_3730	PF00080.15	Sod_Cu	4.6e-15	51.1	0
Neonectria coccinea CBS 119158	Prot_7548	PF10428.4	SOG2	0.013	9.2	8.9
Neonectria coccinea CBS 119158	Prot_12257	PF10428.4	SOG2	0.08	6.6	11.5
Neonectria coccinea CBS 119158	Prot_9505	PF10428.4	SOG2	3.2	1.4	15.2
Neonectria coccinea CBS 119158	Prot_3965	PF04573.7	SPC22	1.6e-25	84.5	0
Neonectria coccinea CBS 119158	Prot_1183	PF12138.3	Spherulin4	2.3e-38	127.1	0.2
Neonectria coccinea CBS 119158	Prot_7643	PF05642.6	Sporozoite_P67	0.0011	11.9	7
Neonectria coccinea CBS 119158	Prot_3058	PF05642.6	Sporozoite_P67	0.0016	11.4	8.3
Neonectria coccinea CBS 119158	Prot_8313	PF05642.6	Sporozoite_P67	0.26	4.1	18.6
Neonectria coccinea CBS 119158	Prot_1229	PF00622.23	SPRY	4.7e-20	67.1	0
Neonectria coccinea CBS 119158	Prot_5743	PF04086.8	SRP-alpha_N	0.33	5.3	15.1
Neonectria coccinea CBS 119158	Prot_11670	PF06933.6	SSP160	0.57	3.1	16
Neonectria coccinea CBS 119158	Prot_6823	PF02116.10	STE2	0.0017	12.5	0
Neonectria coccinea CBS 119158	Prot_7921	PF04270.8	Strep_his_triad	0.048	8.5	0.2
Neonectria coccinea CBS 119158	Prot_7944	PF05843.9	Suf	0.029	9.1	5.8
Neonectria coccinea CBS 119158	Prot_12863	PF00884.18	Sulfatase	2.1e-07	25.5	0.1
Neonectria coccinea CBS 119158	Prot_6014	PF01975.12	SurE	7.6e-43	141.2	0
Neonectria coccinea CBS 119158	Prot_8313	PF01034.15	Syndecan	0.0025	12.6	0.5
Neonectria coccinea CBS 119158	Prot_7387	PF07519.6	Tannase	4.6e-148	488.9	3.1
Neonectria coccinea CBS 119158	Prot_2516	PF03430.8	TATR	0.95	3.1	20.2
Neonectria coccinea CBS 119158	Prot_306	PF03430.8	TATR	4.4	0.8	18.5
Neonectria coccinea CBS 119158	Prot_9331	PF03430.8	TATR	12	-0.6	11.7
Neonectria coccinea CBS 119158	Prot_3875	PF14541.1	TAXi_C	1.6e-07	26.1	0
Neonectria coccinea CBS 119158	Prot_3040	PF14541.1	TAXi_C	4.6e-06	21.4	0
Neonectria coccinea CBS 119158	Prot_6753	PF14541.1	TAXi_C	5.2e-06	21.2	0
Neonectria coccinea CBS 119158	Prot_2050	PF14541.1	TAXi_C	9.4e-05	17.1	0.2
Neonectria coccinea CBS 119158	Prot_2252	PF14541.1	TAXi_C	0.0002	16.1	0
Neonectria coccinea CBS 119158	Prot_954	PF14541.1	TAXi_C	0.0064	11.1	0
Neonectria coccinea CBS 119158	Prot_2252	PF14543.1	TAXi_N	1.4e-10	36.5	0.1
Neonectria coccinea CBS 119158	Prot_954	PF14543.1	TAXi_N	6.1e-06	21.4	0
Neonectria coccinea CBS 119158	Prot_2050	PF14543.1	TAXi_N	3.6e-06	22.1	0.1
Neonectria coccinea CBS 119158	Prot_3040	PF14543.1	TAXi_N	1.1e-05	20.5	0
Neonectria coccinea CBS 119158	Prot_2573	PF12256.3	TATR	0.0043	11.6	0.1
Neonectria coccinea CBS 119158	Prot_4082	PF12256.3	TcdB_toxin_midN	0.081	7.5	0
Neonectria coccinea CBS 119158	Prot_6823	PF03153.8	TFIIA	0.21	6.5	12.9
Neonectria coccinea CBS 119158	Prot_6556	PF03153.8	TFIIA	0.24	6.3	15.2
Neonectria coccinea CBS 119158	Prot_6753	PF03153.8	TFIIA	3.7	2.4	17.3
Neonectria coccinea CBS 119158	Prot_10550	PF05793.7	TFIIF_alpha	0.0022	11.5	8
Neonectria coccinea CBS 119158	Prot_8571	PF05793.7	TFIIF_alpha	0.94	2.8	10.6
Neonectria coccinea CBS 119158	Prot_2143	PF02882.14	THF_DHG_CYH_C	0.0004	14.6	0.2
Neonectria coccinea CBS 119158	Prot_1579	PF01946.12	Thi4	4.2e-07	24.4	1.3
Neonectria coccinea CBS 119158	Prot_2541	PF01946.12	Thi4	6.8e-06	20.4	0.2
Neonectria coccinea CBS 119158	Prot_9436	PF01946.12	Thi4	1.2e-05	19.6	0.1
Neonectria coccinea CBS 119158	Prot_591	PF01946.12	Thi4	6.5e-05	17.2	0.2
Neonectria coccinea CBS 119158	Prot_1589	PF01946.12	Thi4	0.00015	16	0.1
Neonectria coccinea CBS 119158	Prot_1288	PF01946.12	Thi4	0.0012	13.1	0.1
Neonectria coccinea CBS 119158	Prot_3194	PF01946.12	Thi4	0.0015	12.8	0
Neonectria coccinea CBS 119158	Prot_5325	PF01946.12	Thi4	0.0023	12.2	0.1
Neonectria coccinea CBS 119158	Prot_2631	PF01946.12	Thi4	0.0036	11.5	0
Neonectria coccinea CBS 119158	Prot_12464	PF01946.12	Thi4	0.0056	10.9	0.1
Neonectria coccinea CBS 119158	Prot_7690	PF00899.16	ThiF	0.0045	11.9	0
Neonectria coccinea CBS 119158	Prot_11025	PF00975.15	Thioesterase	5.9e-05	18.5	0.1
Neonectria coccinea CBS 119158	Prot_12492	PF00085.15	Thioredoxin	1.6e-30	100	0
Neonectria coccinea CBS 119158	Prot_12492	PF13098.1	Thioredoxin_2	4.4e-10	34.9	0
Neonectria coccinea CBS 119158	Prot_12492	PF13192.1	Thioredoxin_2	0.01	10.8	0
Neonectria coccinea CBS 119158	Prot_12492	PF13462.1	Thioredoxin_4	0.025	9.7	0.1
Neonectria coccinea CBS 119158	Prot_12492	PF13848.1	Thioredoxin_6	0.00044	15.2	0
Neonectria coccinea CBS 119158	Prot_12492	PF13899.1	Thioredoxin_7	1.3e-06	23.5	0
Neonectria coccinea CBS 119158	Prot_12492	PF13905.1	Thioredoxin_8	2.7e-07	25.8	0
Neonectria coccinea CBS 119158	Prot_12492	PF14595.1	Thioredoxin_9	0.037	8.7	0
Neonectria coccinea CBS 119158	Prot_7543	PF00086.13	Thyroglobulin_1	1.4e-06	22.7	1.3
Neonectria coccinea CBS 119158	Prot_6556	PF11711.3	Tim54	11	-0.5	15.5
Neonectria coccinea CBS 119158	Prot_6195	PF12457.3	TIP_N	0.005	12	0.3
Neonectria coccinea CBS 119158	Prot_8313	PF15102.1	TMEM154	0.0063	11.3	4.1
Neonectria coccinea CBS 119158	Prot_916	PF08402.5	TOBE_2	0.00073	14.7	0
Neonectria coccinea CBS 119158	Prot_12535	PF15531.1	Ntox27	0.0011	13.9	0
Neonectria coccinea CBS 119158	Prot_9923	PF05980.7	Toxin_7	0.36	6.1	9.8
Neonectria coccinea CBS 119158	Prot_1952	PF00515.23	TPR_1	1.4e-05	19.7	0
Neonectria coccinea CBS 119158	Prot_1952	PF13374.1	TPR_10	0.0029	12.7	0
Neonectria coccinea CBS 119158	Prot_1952	PF13414.1	TPR_11	5.1e-07	24.4	0.2
Neonectria coccinea CBS 119158	Prot_10830	PF13414.1	TPR_11	0.00013	16.7	0
Neonectria coccinea CBS 119158	Prot_1952	PF13424.1	TPR_12	1.2e-09	33.2	0
Neonectria coccinea CBS 119158	Prot_1952	PF13428.1	TPR_14	0.012	11.5	0
Neonectria coccinea CBS 119158	Prot_10830	PF13428.1	TPR_14	1.2	5.2	0.6
Neonectria coccinea CBS 119158	Prot_1952	PF13432.1	TPR_16	0.00033	16.5	0
Neonectria coccinea CBS 119158	Prot_10830	PF13432.1	TPR_16	0.32	6.9	0.2
Neonectria coccinea CBS 119158	Prot_10830	PF13431.1	TPR_17	0.33	6.6	0
Neonectria coccinea CBS 119158	Prot_1952	PF14559.1	TPR_19	0.00059	15.3	0
Neonectria coccinea CBS 119158	Prot_10830	PF14559.1	TPR_19	0.43	6.1	0.8
Neonectria coccinea CBS 119158	Prot_1952	PF07719.12	TPR_2	0.00028	15.9	0
Neonectria coccinea CBS 119158	Prot_10830	PF13174.1	TPR_6	0.44	6.4	0.1
Neonectria coccinea CBS 119158	Prot_1952	PF13174.1	TPR_6	1.6	4.6	0
Neonectria coccinea CBS 119158	Prot_1952	PF13176.1	TPR_7	4.6e-05	18.2	0
Neonectria coccinea CBS 119158	Prot_10830	PF13176.1	TPR_7	0.35	6.1	0
Neonectria coccinea CBS 119158	Prot_1952	PF13181.1	TPR_8	0.26	6.4	0.1
Neonectria coccinea CBS 119158	Prot_6707	PF01938.15	TRAM	0.09	7.7	0
Neonectria coccinea CBS 119158	Prot_8679	PF03896.11	TRAP_alpha	8.6e-11	36.4	0.1
Neonectria coccinea CBS 119158	Prot_3058	PF03896.11	TRAP_alpha	0.0032	11.6	3.3
Neonectria coccinea CBS 119158	Prot_1877	PF12477.3	TraW_N	0.029	9.5	0.4
Neonectria coccinea CBS 119158	Prot_2631	PF02254.13	TrkA_N	0.00051	15.2	0
Neonectria coccinea CBS 119158	Prot_1579	PF02254.13	TrkA_N	0.011	10.9	0.3
Neonectria coccinea CBS 119158	Prot_2541	PF02254.13	TrkA_N	0.024	9.8	0.1
Neonectria coccinea CBS 119158	Prot_9436	PF04820.9	Trp_halogenase	0.00024	14.9	0
Neonectria coccinea CBS 119158	Prot_2541	PF04820.9	Trp_halogenase	0.00068	13.4	0.4
Neonectria coccinea CBS 119158	Prot_10338	PF04820.9	Trp_halogenase	0.0072	10	0.5
Neonectria coccinea CBS 119158	Prot_1579	PF04820.9	Trp_halogenase	0.018	8.7	1.6
Neonectria coccinea CBS 119158	Prot_10118	PF14558.1	TRP_N	0.00096	14.3	0.1
Neonectria coccinea CBS 119158	Prot_3690	PF00089.21	Trypsin	3.3e-66	218.1	5.2
Neonectria coccinea CBS 119158	Prot_110	PF00089.21	Trypsin	3.9e-66	217.8	5.3
Neonectria coccinea CBS 119158	Prot_110	PF13365.1	Trypsin_2	2.7e-05	19.3	0.8
Neonectria coccinea CBS 119158	Prot_5947	PF02412.13	TSP_3	0.13	6.9	3
Neonectria coccinea CBS 119158	Prot_1882	PF11717.3	Tudor-knot	0.0028	12.5	0.8
Neonectria coccinea CBS 119158	Prot_10383	PF00264.15	Tyrosinase	2.5e-51	170.1	4.2
Neonectria coccinea CBS 119158	Prot_866	PF00264.15	Tyrosinase	8.5e-51	168.3	5.4
Neonectria coccinea CBS 119158	Prot_12692	PF00264.15	Tyrosinase	4.4e-49	162.7	0
Neonectria coccinea CBS 119158	Prot_12304	PF00264.15	Tyrosinase	2.8e-42	140.5	0.3
Neonectria coccinea CBS 119158	Prot_7350	PF00264.15	Tyrosinase	2.4e-39	130.9	0.8
Neonectria coccinea CBS 119158	Prot_2051	PF00264.15	Tyrosinase	8.6e-37	122.5	2.2
Neonectria coccinea CBS 119158	Prot_9349	PF12640.2	UPF04089	0.0077	11.5	0.1
Neonectria coccinea CBS 119158	Prot_306	PF04615.8	Utp14	0.87	2.7	20.7
Neonectria coccinea CBS 119158	Prot_6823	PF04615.8	Utp14	7.1	-0.3	15.6
Neonectria coccinea CBS 119158	Prot_8436	PF01992.11	vATP-synt_AC39	0.0095	10.1	0
Neonectria coccinea CBS 119158	Prot_11025	PF01991.13	vATP-synt_E	0.0026	12.1	0
Neonectria coccinea CBS 119158	Prot_4082	PF13517.1	VCBS	2.4e-12	42.2	2.9
Neonectria coccinea CBS 119158	Prot_2573	PF13517.1	VCBS	9e-12	40.4	1.9
Neonectria coccinea CBS 119158	Prot_11670	PF15231.1	VCX_VCY	0.0035	12.9	0.7
Neonectria coccinea CBS 119158	Prot_3058	PF08432.5	Vfa1	0.073	8.2	9.9
Neonectria coccinea CBS 119158	Prot_6998	PF07545.9	Vg_Tdu	0.33	5.6	1.1
Neonectria coccinea CBS 119158	Prot_6528	PF06057.6	VirJ	0.00039	15.3	0
Neonectria coccinea CBS 119158	Prot_11025	PF06057.6	VirJ	0.0018	13.2	0
Neonectria coccinea CBS 119158	Prot_9089	PF06057.6	VirJ	0.0022	12.9	0
Neonectria coccinea CBS 119158	Prot_1844	PF06057.6	VirJ	0.0076	11.1	0
Neonectria coccinea CBS 119158	Prot_4090	PF13310.1	Virulence_RhuM	0.0061	10.7	0
Neonectria coccinea CBS 119158	Prot_12328	PF07589.6	PEP-CTERM	0.032	9.4	3.3
Neonectria coccinea CBS 119158	Prot_80	PF00095.16	WAP	0.0023	13.1	5.3
Neonectria coccinea CBS 119158	Prot_10073	PF01822.14	WSC	1.7e-20	67.9	3.6
Neonectria coccinea CBS 119158	Prot_8313	PF01822.14	WSC	1.9e-13	45.3	10.2
Neonectria coccinea CBS 119158	Prot_2516	PF01822.14	WSC	1.5e-11	39.2	0.3
Neonectria coccinea CBS 119158	Prot_7937	PF01822.14	WSC	4.7e-09	31.2	5.3
Neonectria coccinea CBS 119158	Prot_5319	PF00397.21	WW	0.015	10.3	0.1
Neonectria coccinea CBS 119158	Prot_407	PF07983.8	X8	6.8e-24	79.3	3.7
Neonectria coccinea CBS 119158	Prot_6338	PF05658.9	YadA_head	0.03	9.8	0.8
Neonectria coccinea CBS 119158	Prot_3230	PF05758.7	Ycf1	0.011	8.6	0
Neonectria coccinea CBS 119158	Prot_6661	PF04893.12	Yip1	0.0023	12.5	0.4
Neonectria coccinea CBS 119158	Prot_8730	PF11106.3	YjbE	0.0018	13.3	0.3
Neonectria coccinea CBS 119158	Prot_11368	PF03734.9	YkuD	0.068	8.5	0
Neonectria coccinea CBS 119158	Prot_10550	PF05764.8	YL1	6.1	1.4	11.5
Neonectria coccinea CBS 119158	Prot_1882	PF00098.18	zf-CCHC	0.00045	15.3	2.9
Neonectria coccinea CBS 119158	Prot_1882	PF09337.5	zf-H2C2	0.00041	14.9	0.1
Neonectria coccinea CBS 119158	Prot_2073	PF13866.1	zf-SAP30	0.042	8.7	1.6
Neonectria coccinea CBS 119158	Prot_353	PF02535.17	Zip	0.011	9.9	2.9

## Sheet: CBS 119158 Peptidases
Predicted peptidases CBS 119158
Prot_8120	PF01650.13	Peptidase_C13
Prot_10203	PF00450.17	Peptidase_S10
Prot_10629	PF00413.19	Peptidase_M10
Prot_10629	PF10462.4	Peptidase_M66
Prot_12164	PF02129.13	Peptidase_S15
Prot_12164	PF00326.16	Peptidase_S9
Prot_12751	PF00246.19	Peptidase_M14
Prot_1497	PF02129.13	Peptidase_S15
Prot_1497	PF00326.16	Peptidase_S9
Prot_1507	PF00450.17	Peptidase_S10
Prot_1792	PF01244.16	Peptidase_M19
Prot_1948	PF03577.10	Peptidase_C69
Prot_2574	PF00082.17	Peptidase_S8
Prot_2881	PF03572.13	Peptidase_S41
Prot_320	PF08192.6	Peptidase_S64
Prot_3235	PF00326.16	Peptidase_S9
Prot_3815	PF00326.16	Peptidase_S9
Prot_4549	PF00326.16	Peptidase_S9
Prot_4689	PF00246.19	Peptidase_M14
Prot_4742	PF00082.17	Peptidase_S8
Prot_52	PF01546.23	Peptidase_M20
Prot_52	PF04389.12	Peptidase_M28
Prot_52	PF05343.9	Peptidase_M42
Prot_5348	PF00246.19	Peptidase_M14
Prot_5354	PF13485.1	Peptidase_MA_2
Prot_5513	PF00450.17	Peptidase_S10
Prot_5562	PF00413.19	Peptidase_M10
Prot_5562	PF05572.8	Peptidase_M43
Prot_5908	PF00450.17	Peptidase_S10
Prot_5947	PF00326.16	Peptidase_S9
Prot_6556	PF08192.6	Peptidase_S64
Prot_6565	PF00326.16	Peptidase_S9
Prot_6718	PF00326.16	Peptidase_S9
Prot_7775	PF00246.19	Peptidase_M14
Prot_8274	PF00082.17	Peptidase_S8
Prot_8294	PF00413.19	Peptidase_M10
Prot_8294	PF05572.8	Peptidase_M43
Prot_8294	PF10462.4	Peptidase_M66
Prot_8435	PF00082.17	Peptidase_S8
Prot_8436	PF09471.5	Peptidase_M64
Prot_879	PF01546.23	Peptidase_M20
Prot_879	PF04389.12	Peptidase_M28
Prot_8978	PF00082.17	Peptidase_S8
Prot_9105	PF00246.19	Peptidase_M14
Prot_9134	PF00082.17	Peptidase_S8
Prot_9248	PF02129.13	Peptidase_S15
Prot_9262	PF00082.17	Peptidase_S8
Prot_9626	PF01546.23	Peptidase_M20
Prot_9626	PF04389.12	Peptidase_M28
Prot_9626	PF05343.9	Peptidase_M42
Prot_9855	PF02102.10	Peptidase_M35
Prot_2050	PF13650.1	Asp_protease_2
Prot_3040	PF13650.1	Asp_protease_2
Prot_2252	PF13650.1	Asp_protease_2
Prot_954	PF13650.1	Asp_protease_2
Prot_954	PF13975.1	gag-asp_proteas

## Sheet: CBS 119158 Effectors
Predicted secreted effectors CBS 119158
>g9401.t1 | Effector probability: 0.793
MALVQLFAAVALLSGQLFPAIAADVPINTPSPMLQPAYPACEQFHLAGVGQDCNALIAFAQIDRAEFFRINPAVNGEQGCTEKIIANTWYCVKAEASHPAPSATANPGPRPTKGRKAPHGGTEKTPKGETKTRKKAQKPKPAKTKTKEPEITKAPVPNYNECVYGDCWYAFGMLSKGDADKASSASSMCKKVFAEGCKDGMDWPGKVNKLCDGCKALKSACPCFLAGHYHTRTMNPLLYSRKGD
>g9594.t1 | Effector probability: 0.751
MQFTTVLVGFFASLALAAPAVEKRQTYVPCSGLYGTAQCCATDILGVADLDCGNPLDTPTSGDNFSAICAEIGQRARCCVLPILEQGVLCQAASGVQE
>g9757.t1 | Effector probability: 0.75
MRILSLVNLAALASALPVALVPSDQGNAPGLSLRDAEVSTITNRSPESNNIPNSDNIIVARAIYDNNFDWPEESFAGGNRDYQFKMTSIGNGQYTVAFYNSGPKNGNTYKYTVAAAGAGNDGTSITRTLSPVSSTSVQIQKSGTYYRVTIEPV
>g10061.t1 | Effector probability: 0.553
MRLPSMSAVLLGAFAWTASALSPDDGNVKSITPYLDSDMQSRWYDFGGDTIVRTDSYIRLTSDRPSQSGWMYSRVPLTATNWQVEVEFKISGKNQLYGDGLAMWITRQRAQAGTVFGGPDKFEGLGIFIDTYKNNRPGVVFPYVSAMFGDGQTSYDKAHDGKSTELAGCSARGIRHASIPTKLRLTYFQDKQLKLELQYKDEDDWMLCFESEEPPAIPNIAYVGFTAETGELSDNHDIISVTAKNLYIQPGNKPGQAGSKSRGKNAKKNKKKSGSSWTWFFTKIILFILVVGGAYVGFTAWRAKSKSHRF
>g10275.t1 | Effector probability: 0.934
MKFFCTILLALTVTATALPKVEPRACGTNICPGAIADKDAECPLECMWGTCVRYHCEGGYDMICGKNRDSCAKV
>g10336.t1 | Effector probability: 0.68
MHFSTAAIFTALLGSVAAAPAGLEARQARLNGIIVCTDDVFADAASTMANAVCVHAYGCEGGSTPVFSGGTWTGSCSSCPIDKLDKGPHEFGGCVFSRL
>g10379.t1 | Effector probability: 0.932
MRFSTAFLLLIPLVAAVPATDSAKALPDLSGAGESGFDFSDHSDGLSLAAGKVCPAKYPRYCSIGGFCCRTKKCCKKQCCQNSAKYCIKGLCYK
>g11078.t1 | Effector probability: 0.954
MQISVALVAVLATFAAAAPKSYGCKPGTYACKSSGKGWQVCNTEGQWVDGGKCPPKTICKFYPPSLSPYCVPPDFEFP
>g11241.t1 | Effector probability: 0.789
MRLSVLSFVWLYACLASAAITWQLQRVSNPTSDESDAYTRIEAAMRLAVARYTRLASRPSKVITVQYVPSVATADANFNGNIRFGSNRSYMNERTALHEISHTLGIGQTQAFNDRCAANNWPSATALLRTWDGASAIINCGGGHIWPYGLNYDTEWSESNANRHCQLINAMLGDGLAG
>g11674.t1 | Effector probability: 0.62
MFSILRVVSLLALVGYSRADFAVGTSASQGGIGEIVPNTGGDIYSTDPAAVSYPGGCLDNVQQFECVSERCLIEGVFEIRGLKTEDQYGFNWNGEGWEFSQNSQTLGFCTKNDDEGCTNTGVNYSLGFFSHMLCTGSINSGF
>g11786.t1 | Effector probability: 0.873
MLPLKSILLFCSLAAAAVLPRVNQDVPAGHCCFTLNEASTGAIVQENNVNGFLYLNGGKPNGWYCINLSNSQNILLDDFNNACFLAPDGLFQCLDPTIGPNSWTLKKSGSNTLLAHDGSTTFTSCPNKNPGQLLYGIKSGDSSQCKKITLKAKGFKGTCKSFSARSLEE
>g12032.t1 | Effector probability: 0.611
MKPITFLTATLAILPGALAVEQKKSVIVWFEDESTPDSAIHDAKQSILDAGGKITHIYTIIKGFSAISPEKALQQVQASGTQYDIHIEEDEEVTTY
>g12384.t1 | Effector probability: 0.755
MKFLSLVAFLTAPLVAYAWTGHVYNNMADCKAGCPARCANGGGTFDGCSGNGDGAGGDFTPLLNRESEGT
>g12584.t1 | Effector probability: 0.568
MFFSKIVMGLAALASMASATAAVDNGITLRDTSGTLLVERTSFKCPTDMSYCGWTKACACPPGKSWDSKKSRCTGTVITGAWPKPSVSVYGSVDAKLGAFCACSPYKIVKYNPKHAYCQASLENVVFLAPLEIEAEIVVYAGGLIDITADISVSLKNTCGGLAGLYLGSVTDAVALFNTNAYGLSVTADNVVGALVSGVLSTVKSLTCLLGLTRCPTYDCVSYCTKGCKNYIDVKGAVGGLLQGLVGFCVLPDVLLFVGSAGNIITVTIEGLLCLVGNILKSLLGIFSCNC
>g12801.t1 | Effector probability: 0.688
MRFSSALLFAGSVLAKSVSLHECLVTHSQDLAAFADCGHQGALAKCLARLQTFAEDDVRACYTGAGCSLADADAEARFALNRCHDMASMGDLKKRFRGAEMLPRADATTTADDAKSTGDSKKTGSIYSGTDCFTTGKKSTTECPLSTSNGHVKTVTCFPTEVTTSSCASTLICTTDSANNDICMDLHHMDVGGIIVSIVFASALVIGAGLLTWACCKDRKEQKRMVAKAEATALVRAATKKQRAAQRAPLIRNASGNSSPNPFQDQNRL
>g37.t1 | Effector probability: 0.695
MHLSSLVIASILGAVSAADLQVNYYSDGGCTEYVLSLHPGIDGGCYDYDWPGTNSVNIADCTYPHGVCVCDFYTQAGCKGASQPVTFPDDNCASNWGHGFLSMKCAVIHDV
>g63.t1 | Effector probability: 0.711
MLAEDAAHMDILVHHQLVILVYRNAIVLQGIVLGVCGQVLEDEVVQPAEVRSGRTRCGFPLFRGFRQGFMPTTPVKAYRRSTPAAFASQNEYQSGSPDTELQRQARLFAGEVNDRASDDGGGNIFLGLDVLLIQKCARGHSSRPKYKPVLHKLVNSQYGAGEFVHAICELPLQIEIHANVIAHRRCVKSRNRGLSAPTYIGLLAKPYDLISLAQKSTIPGGFGSQSGNSRDPMPESPRV
>g604.t1 | Effector probability: 0.868
MRLCSLISFLLLASATVLVSYSAARGDDTSALGLLNLQGWDRANWPSGKRMNSSLYYTTATDPDGVAAAHVHKAAHFARSEYHSLKDKMAQEKVYYIGYHVRFDKIDYQTIVWQWKNYDPDTVKADDIPAALVFRKNSDAHQKLAGNFWPGPNESSDPKFGLYGESNKVGDSYIYDIVIGTKLSEIANVAGIKA
>g695.t1 | Effector probability: 0.856
MMKCGLIVALAGVLALAVPAPLPDEINLDERIKFGWCRETNVTGTCDDHYLDHARCYDFKVLDPYLNDNVETVSVTGGRCVIWEKDGCHGDHTGMIMGRDIVIDNVCPGYTWSTRVSSIKCCGGDSNALWCADPGRKPKCTD
>g902.t1 | Effector probability: 0.893
MRLSSTIQAVALFLATGPSIVSAQVLRQGNGCVCMAPGGSGDTSNAARTERCCRDNQRNMVNTVNFWDRGNFYCYFPDGVDDATWDQGCCRRWYGDNTYGYCNRATA
>g1054.t1 | Effector probability: 0.795
MRINLSLLFWAAGFAAALPQKPECPLLLCVDGVNDCGIPWGGCYDTCHPETAPTPPPCPIEEDDCSTRTVCVDNVNECGIWYGGYVFHHLPILFSGLQALAGPDGAAVSTKDPDTEGYRIASCRIAMS
>g1538.t1 | Effector probability: 0.553
MIGLRVTTICCLLVGAFAVTFAGAQVAPAPDGWPSFSYQGVVTDKAKLKYNPTDEFIFPSVFHASVYLKNPIGDWYLYYAPHDNPGGISLMYADTSDGPWTDPDAKWNVQAGRLFVYFHGTNSQTRWAETDDGATFDYGGIAVDNSMGGPNVTETSYARVFTHRNPASGYAYGMFYMGNERDNKRRIRLAESKDGHSWTVDPDYVVTPGSEDAGNVSGGSLWEWHGQLYVIYHSSSGKTFARTIDRTLRQVGSVPILLHKASGVGDDSGRVASPEIVTYQGETYLFYESGDRLGATIAWAKAT
>g1574.t1 | Effector probability: 0.668
MQFSSILGIFTLATAASAVSVSYDTGYDQKSRSLTTISCSDGSNGLMTKHPSWKTQGDIPKFPYIGGADAIAGWNSPSCGTCWKLEYKGKTINVLAIDHAASGFNIGLDAMNALTHGQAGKLGRVDAKATKVAAKNCGL
>g1674.t1 | Effector probability: 0.785
MVFLTKLGLVAMGLVPAAMACLGYEGGVPTATSTKTNSKVITVAAGEVFDGGWARYDRGSGACGDGEGGDSDAVFLLGAGATLQNVIIGKNQMEGVHCNGACTLRFVWFEDVCEDAITIKNDKKGQETWIIGGGAYHASDKIVQHNGCGTVNIINFYAEDYGKVYRSCGNCSSQCQRNVYVEGTTAYDGGEVVGINANYGDTATLKNVCTDADHPCVMYNGCAGGCEPSKVGYCSG
>g1963.t1 | Effector probability: 0.736
MRSSLLLGPLLWVSSSLAMPNGATCDCSCTRNGGSTAKSYVCRDSRLGPKVLPRKLPLGTLIADYDRFEGLTPGEFLKQWTDAKGDYVYPPQNGFQLDQHGNTINGTMILQTGTFVDRFGSEYGSFVSAAAAPYSQRALPPSNLDTNPSSPDFPYNYHVYQVIKPLAVVGGPIAPWFGQPGLGAQFYTGEVGNIMALIEKGFLKREDASVLIANKGKGCF
>g2073.t1 | Effector probability: 0.787
MKFLIPLSFLIAGAFAQNGCGFPDGPDCVSLGEGANGLEQFADDGCCLLPIRCGNGDGGERCERVAATGNNNNGNANDNATENTNDNANDNTNGNANDDAIADVDAGTGNNNNGNNNNNGNTNNNGNTNNNGNTNDENCGFPNGPDCESLGEGANGLEQFADDGCCLLPFRCGNGDGGERCERVAVAANNRIRFLRAARARNSRVRK
>g2120.t1 | Effector probability: 0.599
MRFFALAAAVLLGTTSILAAPANEKRHACCCCDVSTPAIICQELDAEDCNCPAVVCPAGAPIVWDEQVKLPQAGDEPAKRADGADDHECCCCDPAIPATVCERRSDPEDCMCLAVVCPEDAPTLRAGDPLPTPTPTPASES
>g2157.t1 | Effector probability: 0.918
MKFSVAITALVSVMTASAFPVHKREIGGVLMCTGVNATGTCHYDVYELNKCHQLPEPFLLNINTFAPDGEDFSCYPRVTGCDDICRSPTGCTFGAVDFNYEHKYDLGAIKWDKLFKSFDCTAKKWSSNSTSTSTRRSTTTRRTAY
>g2406.t1 | Effector probability: 0.801
MHFLIISILAAALGAFANPLAPPDEPGNTHDSDLAVNVDSHELFERGKGGYVGSCKDIRYYLGTQDMKVYELSETNPNFLIGKKPFMESPVLVARCPNLSGQTKCSVLRLGDCMANREGQLQPSKK
>g2625.t1 | Effector probability: 0.689
MKAVAILVALSGLLLGANADTHGACGCQINPDGAIDTDATQTCCKRFGGTSTHLSTSGKVRFAGEYVSLSQLRVIRSG
>g2648.t1 | Effector probability: 0.617
MHSKTLILFLASAPGILAASGSGHSTRYWDCCKTSCAWSGKAAVSKPVTTCDKNDNPLSDPDAVSGCDNGSAFACTDNSPWAVNDDLAYGFAATAINGGSESTWCCACYKLTFTSGPVSGKTMVVQSTNTGSDISNNQFDLMMPGGGVGIFDGCSKQFGSALPGAQYGGVSSRDECNQMPAKLQAGCFWRFDWFQNADNPTFNFEQVKCPAALTAISGCVRQDDGDFPAA
>g2688.t1 | Effector probability: 0.56
MHFSLALLLLPLCSALYLPEHLQPRTKGSVHYCTEDVVKLLDLQPSTEKGYYVETFHDPVTVEGSNRTVSTAIYYLLDGAAGYSLWHQLDAAEVWHYYAGAPLVLYLSLDDGSCVRENVLGNDLANGQRPQAVVNRGEWQRARSLGDWTLVGTTVAPGFDVAGQVLQPEGWEPRGC
>g2831.t1 | Effector probability: 0.664
MRGLLPLLSLSAVANALYFYIDGVTPKCFYEELPKDTLVVGHYTAEEYDDRVQAWQKHDGISIYISVDEIFDNDHRVVSQRGQASGQFTFSAADSGDHQICFTPSSSSGRSNWLSTKNPNGGIKLTLDLVIGETNQIESSDKNKIQDITTRVKDLNARLNDIRREQVFQREREAEFRDQSESTNARVIRWIILQLVVLGITCTWQLSHLRSFFIKQKLT
>g3021.t1 | Effector probability: 0.69
MRYLVVLLSLLSLANAQFGGFFDQMFGQQGGGHEHQHQHQQQQQAPSDASHYRHFHEHSSCNKYLCPDTLACVSVPHHCPCAWDAHQEKFELAEGQRICVSRGGFREGEAARKVELARKGLL
>g3654.t1 | Effector probability: 0.919
MKFSATIMGLALLATGTSAQKAVVKNNCKATVYVQSVPIDGSAKGPLTTLTTGKTFTEDLRKSGSTVKIAITKTLNDPLFFGYSFSKTDDYAYYELNSEWGNPFAKSHNILTPGEGCEKFDCPSGKADCYSTPAHKKVYGCPQPVDLKATLCA
>g3697.t1 | Effector probability: 0.587
MNFFVTLLSLTAIAGSATALPQRGGNRGQGNGGRQALINLAGTSVDPNLENGTILLDNGQGQCVAVSGRAVCSDNSGATLGYPVLATR
>g3965.t1 | Effector probability: 0.709
MYNSLTRVQNTFGFFTTVAFVVAALIAASDLLTPRTPSASLIAPTNVQVVKGRPHYYSSKKEEYAIIKFSLDADLSSLFTWNTKQLFVYVTAQWPGSGNATNEAVIWDSIITNPSADHLQNIGPVAMKKLKRSAEGKTIDPSRGLLKLRNQKPKYQITHPSGKIAEKDDVTLKLHYNVQPWVGLLTWNQDQDIGPWKQLVGGVSDTFSLPGLKKKDTPKKKKSN
>g3983.t1 | Effector probability: 0.622
MIFPVAFVGLVLTSVASAAPTSVEPVILYGEDGRMEVVHEAVYQQLVATNGYDLETPDVDEDFLNKTDTADHHLDIRASCAYTGSLITDRTENFVDWDVQMSPVVIGTGKNGIDVYVSSGYSVSNSVTVSGSTELGFVKDRLSTTFGVSYSRTWTTATVVNIKGTVENGWSGVMITKPFKTRRYGRNMQGCIGSLRQTGTFMADSYKEGSYAGVKWVSGAITMCTKKQFPLTRCNGGGRFI
>g3984.t1 | Effector probability: 0.859
MHLTANFSLFLLAAGGALAGLHNAAACVTNRKSSPVGGTGWFVSYTWAKSYEILPDATRCACNYYRNRNTGNKQWDKCPDCTFDGTVCNSAGWHIGGDECGAQGSEAN
>g4064.t1 | Effector probability: 0.555
MVKFIISVSLAMAATAAAFVHPGLLHTEEDFSRVKTHVNNGDKSWVSGWNRLIANSHASPTYEPRPQATVYRGSDGVHPENYRILYNDAHAAYQLGVRWKIDGATENAEASIKILNAWSSTMKAIGGNSDGFLAAGIYGYQLANAGEIMRTYAGWSADDRNALGTLLKDVFYADSYRFLTTHNGQPRYHYWANWDFCSLANIMATGVFTDNQTMYDYAVNYFLHGDGMGALPNFIIANHTEAGSGKTLAQGQEAGRDQGHATLDISLLGVILQQAYNQGDDFFPYMTNSALAASEYAAKYNVNQDVPFSPYYNPKYGNTTEISSNARGTHRPGFELIFSQYDNVMGLNASWTKEYVDAVNEGTDGVEGGGGDYGGNSGGYDYLGFGTLLYRRKA
>g4089.t1 | Effector probability: 0.687
MQYNILAVLTTMVAMTNAVSIYVCTSKDFTGECTDVSFPKNTCTPLPFNDAVSSIRLNNYVCSFYTDKECKGTSMTLAADDPNLRLGTWNDQLTSVLC
>g4093.t1 | Effector probability: 0.928
MKFIHTALLALTATAVNAACDSTLCDGATALRAIPCEDCMTGPCTLYDCGDNNIFNYICGQDKTKCQEIS
>g4323.t1 | Effector probability: 0.865
MFASFTAILAAASATMVSAAAIVPRGSGTASMTPHDQYSSSIGVLGCKIRTDRVAYWPGSVGCDDICVKVSHAGRKVYLLRIDQSGGAHDMSYDAWNYLGFGKSATEDPQQGGGINMEYETVHASKCAHLLQDGKLPLSASNSMNYVASCIAEPNSWVAKNYRLYNIMDPVCKWGVEEHCTLDLAVSNQPNCPSGLGATAKLNLKVSNIVYGTGKKVQAL
>g4456.t1 | Effector probability: 0.581
MKWHIALVSLAFVAPSLAATIVEAYDRVYAYVVYDLDVTVWGPGKGYIAPKCMGSRADKSCTFNEFINFIEVGSADSEPAYYTLDGTYYLTPGTLISLSTTLRDALKNPANWANGLIPSRSSNVGIWNDFGFIIDQAASVAPQRDIQIGRHLKNVEMVLGAVSQSRASALNSKTLSQLSSNVKNVIWQIVEKESDYLTNKWNEIDWDATIKKYPAMSDPGSNLFQSVTAELKTLHNNNAGEVTVRRKVMDMVHLCFGG
>g4837.t1 | Effector probability: 0.843
MQLSNLLSIFTLATAASAISVSYDVGYDDPNRSLTAVSCSDGSNGLMTKYPAWKKQSDIPRFPYIGGAQAIAGWNSPNCGLCFKATYKGKTIYVLAIDHAANGLNVGKTAMDALTGNQATQLGRIDTSVTRVDKKFCGL
>g5258.t1 | Effector probability: 0.906
MLFQVGLLAALVPSALACLGYEGGVPKATATHSNSKYIEVKKGEVYDGKWARFDRGSGACGSGEGGQADAVFLLREGATLKNAIIGKNQKEGVHCDGHCTLEFVWFEDVCEDAISIKNDKAGKETWIIGGGAYHAEDKVIQHNGCGTVNIINFYAEDYGKVYRSCGNCKSQCKRNVYVEGVTARKGGEVVGINQNYGDTATLKNVCTDAKNPCVMYKGCAGGCEPSKVGYCSG
>g5379.t1 | Effector probability: 0.713
MKWHALITSFLPAALALPTSNTDSSLSTRQSANTVTDQLLFSITLPAFTARRNARDPPTLNWESDGCTSSPNNPFGFPFVPACNRHDFGYHNYRAQSRFTVSAKLRIDDNFKTDLYYQCQSSSVSGVCRALADVYYAAVRAFGGDDATPGKRSDSDLVQEYEEKVEIYNQLVQEAQEKGELPVLD
>g5541.t1 | Effector probability: 0.72
MKFPSVLSVLLVAPAFVLSTDLGTEVVSGSSTFYGGNLNGGMCSFVTYKLPTGIYGTAFSGSAWSTAASCGACIEVTGPGGKKIKAMIVDQCPECDKGHLDLFQDAFKAVGGTDGIVQTSYKRVTCDITSPIVLRNKEGTSQLWFSMQVMNHSEPVKSLDVSTDGGKTWQTTTRKEYNFFEKQTGLGTQQVDVRVTSSTGKIITVRNVSIAAQSETKGGSNF
>g6010.t1 | Effector probability: 0.833
MMIASTILLGLLGLTTASPMPAAAAKPKYPLEETAKGFKLSVNVTDPSRDFHPSIQNSFVTSIHTGAGLALVGVIEKGGRVFYQNGTAKEHREGRATIITDGGTPLTPSGLKLTKDSKSKTLSSAHLDFGLGTPGVQLSSTKAYSFLLPETYLACNESLAYYQGQYFITIKQAKITKHSDGSVNRNIPKHCVPVRLVPECAELETLPKGSYSSHKYALDSQCYNDVSKIKWSKYGA
>g6146.t1 | Effector probability: 0.553
MARFSLLTAVLALVSAVNAQCGSGTPDARVTGSGSSFTSTRGSSTVYTGSDYRAAIQAAVDSISSGQRVSVIASGSIGANTITIGSGKIFEGCGTINVGTRSGHGAIESLGTTGVQIPYLTMTGNPYFGLRFYGTRDLTLGRITMNLSGGLGIRFDRDQAANSNVKMDVISVTGAGSHAVETWNIDGLTINEVIARDVGESGLLLQKTTNARVGLVDGNNVGAGTGYATLRMANNNGQNTNGNYNTNVYVDKVVSRGGGRGVFCVSQSGAAVITTVDLANNGGNAVLIENCYNLSIRGGTVNGGGEVRVSARTEFPNTKDVWITLKVDGTTVRESPCGDNVNWTLTGNGARNVC
>g6221.t1 | Effector probability: 0.762
MRSSTLLTAALAALAHALPCSTESCTLTDVPSPVVCGGNGYVAATSTPWYKKSQEEGTIEKCIDACQGGCKAVSWDTQYKTCYFYTADVTKMKLYGKSSFHYFDRACTFDSKPADICGGNGYVAATNTPWYKKSQDEGTMKECLDACRGGCKAISFDTQYKTCYFYTAEVTKMKLYGKSSFHYFDRSCGFENAEQVVCGLAGSADDNAEPNSYDSKVISSGAKDKCLSWCREDDECKAVRYHASSKTCFKYEVAVKDVAVTFEAGKPDVFYDQPCYECTSSTVQAV
>g7213.t1 | Effector probability: 0.556
MVSISFKTLGGATAILLLAQQCQCPPIAVPLFLSAALQTAAAVGSAGASFAGAIIGANAGGGKRRAVLFGRQQQFTAPAGVPQQEFDRCYKDLAQESVHINVQGPVQNNGVRVDGLPASCMNLATVLDGDAAGGPVPQPCGSACILYDNLNAEDYEKMRTIFEGAKNA
>g7545.t1 | Effector probability: 0.57
MKLLLAVSIFAASAIAADWGQSCNDETLDSSTGILTAQCNNGDGKGTVVEAELDLYHCLKYVNGKISAPGGDGTFGDSCKDCTVYRLDDEIYGSLGVTRPWISCTCDGASEAATLNLDITTIANVYGDLVCSR
>g7547.t1 | Effector probability: 0.569
MFQSHYSLALVFSIRAFVGAQGACIGPDVNEATINLMESFEGFSADVYIDPTGNPTVGYGHLCTETNCAEVPYSIPLSDADGEQLLRDDIAVAQQCITLDTTSDVVLNANQYGALVSWAFNVGCGASGSSTLIRRLNNGEDPNTVAGAELPRWNKGNGEVIPGLTRRRAAEVDLFQTASNVAALPVGC
>g7706.t1 | Effector probability: 0.92
MVKIAILPLAFVAALAAFGEARDCTAKLNYCGSVLLDTANSNVLLGKYFPQIADELIRSQKTKCIGKNHVIDSVFYCTGGANGEIRYKQFCQNGCKNGGIGKSDHC
>g7790.t1 | Effector probability: 0.581
MFSFKSISAALLLAASVSAAPTPTNHDSPDGTVSHSRVTHSVVAGLGGLRFDPDNVVAEVGDIIEWHFLPMNHSIAQSSFGEPCEPLADGSGFFSGFNFVTAEGQADNVFQVEIIDDSKPIWYYCPQQKGSHCQNGMVGVINQNFDNQDFSLRRHKELAALTEVSVIPPYEQGGDVIVNPNPNGGF
>g8123.t1 | Effector probability: 0.701
MLLKALLLAIATTAAAWPGRGGDLIGMYSRAFEGVDGQQYIMPYDPIFSAFQDRCDGMQILGEGRAGSLALSGFCLDDNETRYLTELNLNWCLQNNDGQLEVAAKPSSLYFDQSCSNYRLYQTGPRTDNKRMFLAAGCINKAGNFTPTFVKFDDVNETLSVKPVDGRFVCGDHQGTRVAVGDWGTLKDKYIAPQ
>g8201.t1 | Effector probability: 0.773
MYFLNAVRALLAAAVFQAVAAHNIVLPAHGRECFHENLHKDDTMTVTFQVGDREFGSAGNLDIDFWISNPSGQYETNEKTVSNGDYSFTAKHDGKYTYCFGNENWGANTKEVSFNVHGIVYVSESDVPADPLDREVRRLSELLDQVKDEQQYIIMRERTHRNTAESTNNRVKWWNMFVIGIVIGESLFQVWWLRRFFEVKRVV
>g8354.t1 | Effector probability: 0.636
MLVNVALSLALASGALAAPRALIPSRSTEELRAVWKYYKDSSSISLSVYNSDKSVFYGEADGSTIDSGSFAHYPLTFDVDNIGFGKVTFGNSTYLTRDNRKHSGGAICHRKFNADEAEVDCWLPSPRGFEPEAVYGAEKRQLQGVIPCQLKATTYMVGDGDPHQNYYHKQISENIFCGASPSCAVGYEQSESYTIGFSVSGDITEWLSGGFDVQKSWETGNSYTCYGAVGDTVCVWYNTAHTAYTVRTVTTQQQPCSNPHETVLDPVVIKSPNSNNRGGGYYCVIGTCRSKGDAYWDDNGPAGGPQ
>g8725.t1 | Effector probability: 0.841
MVRLTSSVVALTVLVGAHLASCYSNTGLIQMVTYVKRHPDFTRDEFWGYWETQHAPKVVPLATHFNITRYQQIQVGGKIPPTEAGASQPASNDLVDFDGIAMFLCSSPDVLTEMLSHPYYLEVVEPDEHVFIDKEAFRGGMVATYTGEHIEAVDRSKDVWVGSKATRRKFQKLFNSYL
>g8730.t1 | Effector probability: 0.88
MKFSAVLTGLFATVAIAAPSADVTPNTVGVLDKRASFPIPASKGSVTYKKVQTIKGTFDGGMKTYGRGVKCTGQKEGGDADAVFILENGATLKNAIIGADQIEGVHCKGACTIENVWWKKVCEDALSIKGDGNALVKGGGATGASDKIIQHNGLGTVTIDGFTAVDFGKLYRSCGNCKVMGQRNVVVKNVKASNGKLLTGINSNKGDVATITNTCATSVKKICTEYKGTTPGNEPKEISSGPSDHCKYSTIKSC
>g8953.t1 | Effector probability: 0.779
MQIKALLFAPLLASGLVSAAPSASKSEIFEILTLRSASPIHFSSVQAARNSIFLHLPDQKAVCDKKSDNAATFKLIDGELHLYRSSGTQQKLFVDRSGMGQGVLQYSTSDALPRNAERKGWKIDKYGDLNFNGAGLLACPGSISNSWSVWVDAGNSNPGGNKNCLGFTARTVKISKPNSCKYTERK
>g8983.t1 | Effector probability: 0.856
MLAQTFSAFLFLAFAAADLHNSCTCHNGDSYNWRMTTNACTSYNDANYKWGGAFYDTPSGRCTQQSAEEQLAGKEWEAACKETAMAGFQCADGEGTCYTDPDNVRGQC

## Sheet: CBS 226.31
Supplementary Table 6. Predicted secretome for the Nectriaceous fungi studied
Name isolate	Target protein	Accession	Annotation	E-value	Score	Bias
Neonectria ditissima CBS 226.31	Prot_3442	PF02737.13	3HCDH_N	0.0042	12	0
Neonectria ditissima CBS 226.31	Prot_11038	PF13191.1	AAA_16	0.006	11.8	0.1
Neonectria ditissima CBS 226.31	Prot_9153	PF12730.2	ABC-2 family transporter	0.011	10.1	0
Neonectria ditissima CBS 226.31	Prot_9063	PF00561.15	Abhydrolase_1	1.7e-19	65.5	0
Neonectria ditissima CBS 226.31	Prot_6240	PF00561.15	Abhydrolase_1	1.6e-12	42.7	0.2
Neonectria ditissima CBS 226.31	Prot_11850	PF00561.15	Abhydrolase_1	9.8e-09	30.3	0.1
Neonectria ditissima CBS 226.31	Prot_3187	PF00561.15	Abhydrolase_1	1.1e-06	23.6	0
Neonectria ditissima CBS 226.31	Prot_10254	PF00561.15	Abhydrolase_1	1.3e-05	20.1	0.1
Neonectria ditissima CBS 226.31	Prot_3161	PF00561.15	Abhydrolase_1	5.3e-05	18.1	0
Neonectria ditissima CBS 226.31	Prot_8968	PF00561.15	Abhydrolase_1	8.9e-05	17.3	0.2
Neonectria ditissima CBS 226.31	Prot_8213	PF00561.15	Abhydrolase_1	0.00011	17.1	0.2
Neonectria ditissima CBS 226.31	Prot_10378	PF00561.15	Abhydrolase_1	0.00043	15.1	0
Neonectria ditissima CBS 226.31	Prot_10579	PF00561.15	Abhydrolase_1	0.009	10.8	0.1
Neonectria ditissima CBS 226.31	Prot_6345	PF00561.15	Abhydrolase_1	0.001	13.9	0.1
Neonectria ditissima CBS 226.31	Prot_11511	PF00561.15	Abhydrolase_1	0.00069	14.4	0
Neonectria ditissima CBS 226.31	Prot_11915	PF00561.15	Abhydrolase_1	0.0041	11.9	0.1
Neonectria ditissima CBS 226.31	Prot_8968	PF02230.11	Abhydrolase_2	4.2e-05	18.3	0.1
Neonectria ditissima CBS 226.31	Prot_10579	PF02230.11	Abhydrolase_2	0.0061	11.2	0
Neonectria ditissima CBS 226.31	Prot_11436	PF02230.11	Abhydrolase_2	0.005	11.5	0
Neonectria ditissima CBS 226.31	Prot_11680	PF07859.8	Abhydrolase_3	6.7e-09	30.8	0.4
Neonectria ditissima CBS 226.31	Prot_4082	PF07859.8	Abhydrolase_3	5.8e-08	27.8	0.1
Neonectria ditissima CBS 226.31	Prot_4016	PF07859.8	Abhydrolase_3	1.1e-06	23.6	0.2
Neonectria ditissima CBS 226.31	Prot_12744	PF07859.8	Abhydrolase_3	8.2e-06	20.7	0.1
Neonectria ditissima CBS 226.31	Prot_2414	PF07859.8	Abhydrolase_3	6.3e-06	21.1	0
Neonectria ditissima CBS 226.31	Prot_11850	PF07859.8	Abhydrolase_3	5.1e-06	21.4	0.8
Neonectria ditissima CBS 226.31	Prot_7995	PF07859.8	Abhydrolase_3	7.8e-05	17.5	0
Neonectria ditissima CBS 226.31	Prot_2303	PF07859.8	Abhydrolase_3	6.9e-05	17.7	0.5
Neonectria ditissima CBS 226.31	Prot_10463	PF07859.8	Abhydrolase_3	0.00014	16.7	0.3
Neonectria ditissima CBS 226.31	Prot_11742	PF07859.8	Abhydrolase_3	8.4e-05	17.4	0
Neonectria ditissima CBS 226.31	Prot_10378	PF07859.8	Abhydrolase_3	0.0023	12.7	0
Neonectria ditissima CBS 226.31	Prot_5418	PF07859.8	Abhydrolase_3	0.0013	13.6	0
Neonectria ditissima CBS 226.31	Prot_11019	PF07859.8	Abhydrolase_3	0.00091	14	0
Neonectria ditissima CBS 226.31	Prot_9063	PF07859.8	Abhydrolase_3	0.0061	11.3	0
Neonectria ditissima CBS 226.31	Prot_10254	PF07859.8	Abhydrolase_3	0.0057	11.4	0.2
Neonectria ditissima CBS 226.31	Prot_6433	PF12695.2	Abhydrolase_5	7.3e-17	56.7	0
Neonectria ditissima CBS 226.31	Prot_9063	PF12695.2	Abhydrolase_5	4.8e-14	47.6	0
Neonectria ditissima CBS 226.31	Prot_10579	PF12695.2	Abhydrolase_5	3e-12	41.7	0
Neonectria ditissima CBS 226.31	Prot_11850	PF12695.2	Abhydrolase_5	5.5e-14	47.4	0.5
Neonectria ditissima CBS 226.31	Prot_1387	PF12695.2	Abhydrolase_5	1.2e-13	46.3	0
Neonectria ditissima CBS 226.31	Prot_6240	PF12695.2	Abhydrolase_5	7.3e-13	43.7	0.2
Neonectria ditissima CBS 226.31	Prot_3161	PF12695.2	Abhydrolase_5	7.1e-12	40.5	0.1
Neonectria ditissima CBS 226.31	Prot_10378	PF12695.2	Abhydrolase_5	4.8e-11	37.8	0
Neonectria ditissima CBS 226.31	Prot_6675	PF12695.2	Abhydrolase_5	2.9e-09	32	0
Neonectria ditissima CBS 226.31	Prot_10254	PF12695.2	Abhydrolase_5	2e-07	26.1	0.1
Neonectria ditissima CBS 226.31	Prot_1635	PF12695.2	Abhydrolase_5	1.3e-05	20.2	0
Neonectria ditissima CBS 226.31	Prot_11019	PF12695.2	Abhydrolase_5	3.3e-05	18.9	0
Neonectria ditissima CBS 226.31	Prot_11511	PF12695.2	Abhydrolase_5	0.025	9.6	0
Neonectria ditissima CBS 226.31	Prot_4082	PF12695.2	Abhydrolase_5	0.00019	16.4	0.1
Neonectria ditissima CBS 226.31	Prot_7751	PF12695.2	Abhydrolase_5	0.038	9	0
Neonectria ditissima CBS 226.31	Prot_13186	PF12695.2	Abhydrolase_5	0.00042	15.3	2.3
Neonectria ditissima CBS 226.31	Prot_12167	PF12695.2	Abhydrolase_5	0.003	12.6	0
Neonectria ditissima CBS 226.31	Prot_6345	PF12695.2	Abhydrolase_5	0.067	8.2	0.1
Neonectria ditissima CBS 226.31	Prot_8213	PF12695.2	Abhydrolase_5	0.0049	11.9	2.7
Neonectria ditissima CBS 226.31	Prot_9063	PF12697.2	Abhydrolase_6	2.1e-36	121.1	0
Neonectria ditissima CBS 226.31	Prot_6240	PF12697.2	Abhydrolase_6	4.5e-32	107	0.3
Neonectria ditissima CBS 226.31	Prot_3161	PF12697.2	Abhydrolase_6	1.1e-31	105.6	0
Neonectria ditissima CBS 226.31	Prot_10579	PF12697.2	Abhydrolase_6	2.6e-14	48.8	0.1
Neonectria ditissima CBS 226.31	Prot_3187	PF12697.2	Abhydrolase_6	3.1e-13	45.3	0
Neonectria ditissima CBS 226.31	Prot_10378	PF12697.2	Abhydrolase_6	1e-13	46.9	0.3
Neonectria ditissima CBS 226.31	Prot_6675	PF12697.2	Abhydrolase_6	1.3e-12	43.3	0
Neonectria ditissima CBS 226.31	Prot_11850	PF12697.2	Abhydrolase_6	1.1e-12	43.5	2.2
Neonectria ditissima CBS 226.31	Prot_1387	PF12697.2	Abhydrolase_6	9.6e-12	40.4	2.4
Neonectria ditissima CBS 226.31	Prot_6433	PF12697.2	Abhydrolase_6	4.6e-08	28.4	0
Neonectria ditissima CBS 226.31	Prot_6345	PF12697.2	Abhydrolase_6	5.6e-05	18.3	0
Neonectria ditissima CBS 226.31	Prot_13186	PF12697.2	Abhydrolase_6	7.5e-06	21.2	0.6
Neonectria ditissima CBS 226.31	Prot_10254	PF12697.2	Abhydrolase_6	2.8e-05	19.3	0
Neonectria ditissima CBS 226.31	Prot_5951	PF12697.2	Abhydrolase_6	0.00016	16.8	0.4
Neonectria ditissima CBS 226.31	Prot_11915	PF12697.2	Abhydrolase_6	0.00052	15.1	0.1
Neonectria ditissima CBS 226.31	Prot_8968	PF12697.2	Abhydrolase_6	0.00019	16.6	0.1
Neonectria ditissima CBS 226.31	Prot_1635	PF12697.2	Abhydrolase_6	0.0012	14	0
Neonectria ditissima CBS 226.31	Prot_10404	PF12697.2	Abhydrolase_6	0.0037	12.4	0.1
Neonectria ditissima CBS 226.31	Prot_8213	PF12697.2	Abhydrolase_6	0.0015	13.6	0.2
Neonectria ditissima CBS 226.31	Prot_11019	PF12697.2	Abhydrolase_6	0.0026	12.9	0
Neonectria ditissima CBS 226.31	Prot_11511	PF12697.2	Abhydrolase_6	0.0093	11	0
Neonectria ditissima CBS 226.31	Prot_8968	PF10081.4	Abhydrolase_9	7.7e-05	16.7	0.1
Neonectria ditissima CBS 226.31	Prot_4212	PF00694.14	Aconitase_C	0.0026	13.1	0.1
Neonectria ditissima CBS 226.31	Prot_1713	PF10199.4	Adaptin_binding	0.095	8.2	6.3
Neonectria ditissima CBS 226.31	Prot_6847	PF05110.8	AF-4	1.2	2	9.2
Neonectria ditissima CBS 226.31	Prot_11561	PF00578.16	AhpC-TSA	1e-05	20.5	0
Neonectria ditissima CBS 226.31	Prot_3039	PF00586.19	AIRS	0.0041	12.6	0
Neonectria ditissima CBS 226.31	Prot_2714	PF01262.16	AlaDh_PNT_C	0.00019	16.2	1.4
Neonectria ditissima CBS 226.31	Prot_8202	PF00171.17	Aldedh	2.9e-127	420	0
Neonectria ditissima CBS 226.31	Prot_789	PF01263.15	Aldose_epim	2.1e-49	163.4	0.1
Neonectria ditissima CBS 226.31	Prot_12309	PF01263.15	Aldose_epim	1.3e-17	59	0.2
Neonectria ditissima CBS 226.31	Prot_6637	PF05426.7	Alginate_lyase	1.1e-15	52.9	5.8
Neonectria ditissima CBS 226.31	Prot_6320	PF05426.7	Alginate_lyase	2e-15	52.1	0.1
Neonectria ditissima CBS 226.31	Prot_3220	PF05426.7	Alginate_lyase	1.4e-07	26.4	11.8
Neonectria ditissima CBS 226.31	Prot_1796	PF00245.15	Alk_phosphatase	4.9e-69	228.2	0.1
Neonectria ditissima CBS 226.31	Prot_1737	PF00128.19	Alpha_amylase	1.9e-65	216.5	1.6
Neonectria ditissima CBS 226.31	Prot_4212	PF00128.19	Alpha_amylase	1.3e-64	213.8	0.4
Neonectria ditissima CBS 226.31	Prot_9425	PF06964.7	Alpha-L-AF_C	4.1e-29	96.8	0
Neonectria ditissima CBS 226.31	Prot_11471	PF03229.8	Alpha_GJ	0.079	8.5	11.2
Neonectria ditissima CBS 226.31	Prot_11975	PF01425.16	Amidase	3.9e-57	189.2	0
Neonectria ditissima CBS 226.31	Prot_7427	PF01425.16	Amidase	2.5e-28	94.3	0.1
Neonectria ditissima CBS 226.31	Prot_2378	PF01979.15	Amidohydro_1	3.6e-14	48.3	0
Neonectria ditissima CBS 226.31	Prot_5298	PF01979.15	Amidohydro_1	8.4e-09	30.7	0
Neonectria ditissima CBS 226.31	Prot_6292	PF04909.9	Amidohydro_2	2.8e-28	94.4	0.1
Neonectria ditissima CBS 226.31	Prot_5298	PF07969.6	Amidohydro_3	7.2e-47	155.6	0
Neonectria ditissima CBS 226.31	Prot_13603	PF07969.6	Amidohydro_3	6.8e-15	50.3	0.7
Neonectria ditissima CBS 226.31	Prot_2378	PF07969.6	Amidohydro_3	0.00013	16.5	0.1
Neonectria ditissima CBS 226.31	Prot_5298	PF13147.1	Amidohydro_1	2.4e-06	23	0.2
Neonectria ditissima CBS 226.31	Prot_2378	PF13147.1	Amidohydro_1	0.0011	14.3	0.1
Neonectria ditissima CBS 226.31	Prot_2378	PF13594.1	Urease_alpha	2.7e-14	48	0.1
Neonectria ditissima CBS 226.31	Prot_5298	PF13594.1	Urease_alpha	1.7e-11	39	0.1
Neonectria ditissima CBS 226.31	Prot_13603	PF13594.1	Urease_alpha	0.0016	13.5	0
Neonectria ditissima CBS 226.31	Prot_2714	PF01593.19	Amino_oxidase	2.5e-08	28.6	0
Neonectria ditissima CBS 226.31	Prot_8330	PF01593.19	Amino_oxidase	2.5e-09	31.9	0
Neonectria ditissima CBS 226.31	Prot_6333	PF01593.19	Amino_oxidase	0.00014	16.2	0
Neonectria ditissima CBS 226.31	Prot_4684	PF14828.1	Amnionless	4.7e-05	17.2	0
Neonectria ditissima CBS 226.31	Prot_13241	PF00501.23	AMP-binding	3.4e-75	248.2	0
Neonectria ditissima CBS 226.31	Prot_13241	PF13193.1	AMP-binding_C	1.7e-12	43.4	0
Neonectria ditissima CBS 226.31	Prot_1271	PF10731.4	Anophelin	0.0061	11.9	0.1
Neonectria ditissima CBS 226.31	Prot_4016	PF08102.6	Antimicrobial_7	0.013	10.7	0.5
Neonectria ditissima CBS 226.31	Prot_6403	PF02558.11	ApbA	0.0018	12.9	0
Neonectria ditissima CBS 226.31	Prot_9830	PF02558.11	ApbA	0.0057	11.3	0.2
Neonectria ditissima CBS 226.31	Prot_4822	PF02558.11	ApbA	0.011	10.4	0.1
Neonectria ditissima CBS 226.31	Prot_6083	PF08672.6	ANAPC2	1.1	4.8	0
Neonectria ditissima CBS 226.31	Prot_10818	PF10471.4	ANAPC_CDC26	0.035	10.1	1.9
Neonectria ditissima CBS 226.31	Prot_11332	PF10471.4	ANAPC_CDC26	1.1	5.4	8.1
Neonectria ditissima CBS 226.31	Prot_11909	PF01636.18	APH	0.0035	12.3	0
Neonectria ditissima CBS 226.31	Prot_4377	PF02311.14	AraC_binding	0.0058	11.6	0
Neonectria ditissima CBS 226.31	Prot_953	PF01731.15	Arylesterase	1.8e-05	19.9	0
Neonectria ditissima CBS 226.31	Prot_169	PF01731.15	Arylesterase	1e-05	20.7	0
Neonectria ditissima CBS 226.31	Prot_5846	PF05935.6	Arylsulfotrans	4.1e-19	63.6	0.1
Neonectria ditissima CBS 226.31	Prot_13008	PF05935.6	Arylsulfotrans	2e-11	38.3	0
Neonectria ditissima CBS 226.31	Prot_13008	PF14269.1	Arylsulfotran_2	8.6e-46	151.6	0.1
Neonectria ditissima CBS 226.31	Prot_5846	PF14269.1	Arylsulfotran_2	6.4e-42	138.9	0.3
Neonectria ditissima CBS 226.31	Prot_4494	PF08688.5	ASD1	0.00093	14.2	0
Neonectria ditissima CBS 226.31	Prot_6193	PF15323.1	Ashwin	11	1.1	17.7
Neonectria ditissima CBS 226.31	Prot_10519	PF00026.18	Asp	8.4e-68	224.1	7
Neonectria ditissima CBS 226.31	Prot_3281	PF00026.18	Asp	3.2e-46	153.2	20.5
Neonectria ditissima CBS 226.31	Prot_978	PF00026.18	Asp	2.7e-40	133.7	0
Neonectria ditissima CBS 226.31	Prot_6931	PF00026.18	Asp	3e-17	58	0
Neonectria ditissima CBS 226.31	Prot_4297	PF05279.6	Asp-B-Hydro_N	13	0.7	27
Neonectria ditissima CBS 226.31	Prot_3281	PF13650.1	Asp_protease_2	5.4e-06	22.1	0.4
Neonectria ditissima CBS 226.31	Prot_978	PF13650.1	Asp_protease_2	0.062	9.1	0
Neonectria ditissima CBS 226.31	Prot_10519	PF13650.1	Asp_protease_2	0.0065	12.2	0
Neonectria ditissima CBS 226.31	Prot_12437	PF09451.5	ATG27	3.1e-07	25.1	0.7
Neonectria ditissima CBS 226.31	Prot_4644	PF09451.5	ATG27	2.5e-06	22.1	0.1
Neonectria ditissima CBS 226.31	Prot_3147	PF01902.12	Diphthami_syn_2	0.005	11.4	0
Neonectria ditissima CBS 226.31	Prot_3922	PF05493.8	ATP_synt_H	0.00021	16.5	0.2
Neonectria ditissima CBS 226.31	Prot_13036	PF03154.10	Atrophin-1	1.8	1.7	14
Neonectria ditissima CBS 226.31	Prot_10378	PF05448.7	AXE1	0.0037	11	0
Neonectria ditissima CBS 226.31	Prot_1387	PF05448.7	AXE1	0.0021	11.8	0.1
Neonectria ditissima CBS 226.31	Prot_10579	PF05448.7	AXE1	0.0084	9.8	0
Neonectria ditissima CBS 226.31	Prot_10579	PF08840.6	BAAT_C	1.6e-05	19.9	0
Neonectria ditissima CBS 226.31	Prot_1387	PF08840.6	BAAT_C	8.1e-05	17.6	0
Neonectria ditissima CBS 226.31	Prot_10254	PF08840.6	BAAT_C	0.0036	12.2	0.2
Neonectria ditissima CBS 226.31	Prot_4037	PF11758.3	Bacteriocin_IIi	0.68	4.9	0.1
Neonectria ditissima CBS 226.31	Prot_10774	PF05290.6	Baculo_IE-1	0.0027	12.6	0.2
Neonectria ditissima CBS 226.31	Prot_11705	PF04513.7	Baculo_PEP_C	0.0046	12	0
Neonectria ditissima CBS 226.31	Prot_8787	PF04513.7	Baculo_PEP_C	0.013	10.5	9
Neonectria ditissima CBS 226.31	Prot_11160	PF04684.8	BAF1_ABF1	0.62	4	10.7
Neonectria ditissima CBS 226.31	Prot_11609	PF00967.12	Barwin	0.0022	12.9	0
Neonectria ditissima CBS 226.31	Prot_1709	PF08031.7	BBE	4.4e-16	53.8	0
Neonectria ditissima CBS 226.31	Prot_3803	PF08031.7	BBE	5.2e-16	53.6	0
Neonectria ditissima CBS 226.31	Prot_9395	PF08031.7	BBE	2.6e-12	41.7	1.2
Neonectria ditissima CBS 226.31	Prot_4031	PF08031.7	BBE	2.6e-12	41.7	0
Neonectria ditissima CBS 226.31	Prot_8060	PF08031.7	BBE	2.2e-11	38.8	0
Neonectria ditissima CBS 226.31	Prot_11721	PF08031.7	BBE	7.3e-11	37.1	0
Neonectria ditissima CBS 226.31	Prot_13485	PF08031.7	BBE	8.4e-08	27.3	0
Neonectria ditissima CBS 226.31	Prot_4070	PF08031.7	BBE	1.6e-06	23.2	0.7
Neonectria ditissima CBS 226.31	Prot_8791	PF08031.7	BBE	6.2e-06	21.3	0.1
Neonectria ditissima CBS 226.31	Prot_4000	PF08031.7	BBE	3e-05	19.1	0.1
Neonectria ditissima CBS 226.31	Prot_4081	PF08031.7	BBE	0.00023	16.3	0.2
Neonectria ditissima CBS 226.31	Prot_6182	PF00144.19	Beta-lactamase	4.2e-35	116.5	0.1
Neonectria ditissima CBS 226.31	Prot_3204	PF00144.19	Beta-lactamase	7.4e-15	50	0
Neonectria ditissima CBS 226.31	Prot_5232	PF10435.4	BetaGal_dom2	2.2e-61	201.6	0.2
Neonectria ditissima CBS 226.31	Prot_5232	PF13363.1	BetaGal_dom3	2.1e-21	70.4	0
Neonectria ditissima CBS 226.31	Prot_5232	PF13364.1	BetaGal_dom4_5	4.5e-22	73.7	1.6
Neonectria ditissima CBS 226.31	Prot_3279	PF13229.1	Beta_helix	2e-11	39.1	7.7
Neonectria ditissima CBS 226.31	Prot_6384	PF13229.1	BetaGal_dom4_5	1e-07	27.1	14.9
Neonectria ditissima CBS 226.31	Prot_3826	PF13229.1	Beta_helix	6.6e-08	27.7	11.1
Neonectria ditissima CBS 226.31	Prot_3289	PF13229.1	Beta_helix	0.0049	11.9	33
Neonectria ditissima CBS 226.31	Prot_11974	PF13229.1	Beta_helix	0.0002	16.3	10.1
Neonectria ditissima CBS 226.31	Prot_6546	PF13229.1	Beta_helix	0.00019	16.4	25.1
Neonectria ditissima CBS 226.31	Prot_5376	PF13229.1	Beta_helix	0.7	4.8	18.3
Neonectria ditissima CBS 226.31	Prot_11202	PF07523.7	Big_3	0.19	7.1	0.6
Neonectria ditissima CBS 226.31	Prot_8023	PF13205.1	Big_5	0.0048	12.7	0
Neonectria ditissima CBS 226.31	Prot_13367	PF02012.15	BNR	0.0028	12.7	0.2
Neonectria ditissima CBS 226.31	Prot_5039	PF02012.15	BNR	0.0017	13.4	1.7
Neonectria ditissima CBS 226.31	Prot_13224	PF09073.5	BUD22	0.63	4.2	31.4
Neonectria ditissima CBS 226.31	Prot_9813	PF09073.5	BUD22	1.2	3.3	20.4
Neonectria ditissima CBS 226.31	Prot_12230	PF09792.4	But2	2.6e-05	19.2	0.1
Neonectria ditissima CBS 226.31	Prot_7377	PF00386.16	C1q	0.48	5.7	0
Neonectria ditissima CBS 226.31	Prot_4684	PF11600.3	CAF-1_p150	3.1	2.3	8.6
Neonectria ditissima CBS 226.31	Prot_11705	PF09053.5	CagZ	0.0038	11.8	0
Neonectria ditissima CBS 226.31	Prot_5417	PF01216.12	Calsequestrin	0.015	9.3	1.1
Neonectria ditissima CBS 226.31	Prot_11435	PF08683.6	CAMSAP_CKK	0.0066	11.4	0.1
Neonectria ditissima CBS 226.31	Prot_8175	PF00188.21	CAP	9.3e-20	66.6	0.1
Neonectria ditissima CBS 226.31	Prot_13474	PF00188.21	CAP	7.1e-19	63.7	1.8
Neonectria ditissima CBS 226.31	Prot_9270	PF05704.7	Caps_synth	5.2e-09	30.8	0
Neonectria ditissima CBS 226.31	Prot_10478	PF05704.7	Caps_synth	2.6e-08	28.6	0.1
Neonectria ditissima CBS 226.31	Prot_1035	PF13620.1	CarboxypepD_reg	1e-05	20.8	0.2
Neonectria ditissima CBS 226.31	Prot_7836	PF13620.1	CarboxypepD_reg	0.0011	14.3	0
Neonectria ditissima CBS 226.31	Prot_1735	PF13620.1	CarboxypepD_reg	0.00083	14.7	1.3
Neonectria ditissima CBS 226.31	Prot_7416	PF08462.5	Carmo_coat_C	0.012	10.8	0.1
Neonectria ditissima CBS 226.31	Prot_1164	PF00199.14	Catalase	9.7e-159	523.3	0.2
Neonectria ditissima CBS 226.31	Prot_1164	PF06628.7	Catalase-rel	2.4e-21	70.6	0.1
Neonectria ditissima CBS 226.31	Prot_10192	PF02275.13	CBAH	2.2e-22	75.1	0
Neonectria ditissima CBS 226.31	Prot_9067	PF14683.1	CBM-like	2.1e-57	188.6	0
Neonectria ditissima CBS 226.31	Prot_1735	PF14683.1	CBM-like	5.1e-51	167.8	1.3
Neonectria ditissima CBS 226.31	Prot_1035	PF14683.1	CBM-like	8.6e-50	163.8	0
Neonectria ditissima CBS 226.31	Prot_7836	PF14683.1	CBM-like	3.5e-13	44.8	0
Neonectria ditissima CBS 226.31	Prot_5935	PF00734.13	CBM_1	4.2e-15	50.4	13.7
Neonectria ditissima CBS 226.31	Prot_4182	PF00734.13	CBM_1	3.9e-14	47.3	11.6
Neonectria ditissima CBS 226.31	Prot_7135	PF00734.13	CBM_1	1.8e-13	45.2	6.2
Neonectria ditissima CBS 226.31	Prot_11974	PF00734.13	CBM_1	4.9e-13	43.8	10.9
Neonectria ditissima CBS 226.31	Prot_5191	PF00734.13	CBM_1	9.4e-13	42.9	15
Neonectria ditissima CBS 226.31	Prot_8213	PF00734.13	CBM_1	1e-11	39.5	13.3
Neonectria ditissima CBS 226.31	Prot_10254	PF00734.13	CBM_1	4e-08	28.1	2.6
Neonectria ditissima CBS 226.31	Prot_1570	PF02018.12	CBM_4_9	0.00018	16.7	0
Neonectria ditissima CBS 226.31	Prot_298	PF02018.12	CBM_4_9	0.00091	14.5	0.1
Neonectria ditissima CBS 226.31	Prot_4297	PF14968.1	CCDC84	1.7	3.2	15.8
Neonectria ditissima CBS 226.31	Prot_5087	PF04995.9	CcmD	0.00036	15.5	0.4
Neonectria ditissima CBS 226.31	Prot_9153	PF09507.5	CDC27	0.026	8.9	31.3
Neonectria ditissima CBS 226.31	Prot_5087	PF09507.5	CDC27	0.12	6.8	22.4
Neonectria ditissima CBS 226.31	Prot_9813	PF02724.9	CDC45	0.19	4.8	11.7
Neonectria ditissima CBS 226.31	Prot_8112	PF00150.13	Cellulase	1.9e-55	183.2	1.6
Neonectria ditissima CBS 226.31	Prot_5191	PF00150.13	Cellulase	3.5e-55	182.4	4.4
Neonectria ditissima CBS 226.31	Prot_8077	PF00150.13	Cellulase	7.1e-21	69.8	6.6
Neonectria ditissima CBS 226.31	Prot_7017	PF00150.13	Cellulase	4.5e-20	67.2	2.4
Neonectria ditissima CBS 226.31	Prot_10074	PF00150.13	Cellulase	3.4e-17	57.7	1.2
Neonectria ditissima CBS 226.31	Prot_5232	PF00150.13	Cellulase	8.7e-09	30.1	0.2
Neonectria ditissima CBS 226.31	Prot_10213	PF00150.13	Cellulase	1.3e-05	19.8	1.4
Neonectria ditissima CBS 226.31	Prot_4212	PF00150.13	Cellulase	0.0021	12.5	0
Neonectria ditissima CBS 226.31	Prot_7017	PF12876.2	Cellulase-like	2e-06	23.4	0
Neonectria ditissima CBS 226.31	Prot_9475	PF09026.5	CENP-B_dimeris	0.00082	14.9	0.5
Neonectria ditissima CBS 226.31	Prot_11332	PF09026.5	CENP-B_dimeris	0.18	7.3	6.5
Neonectria ditissima CBS 226.31	Prot_5223	PF07249.7	Cerato-platanin	2.7e-55	180.7	0.3
Neonectria ditissima CBS 226.31	Prot_11809	PF07249.7	Cerato-platanin	2.5e-54	177.6	0.6
Neonectria ditissima CBS 226.31	Prot_9752	PF07249.7	Cerato-platanin	9.7e-06	20.8	0.1
Neonectria ditissima CBS 226.31	Prot_1443	PF11439.3	T3SchapCesA	0.0064	11.7	0.3
Neonectria ditissima CBS 226.31	Prot_8914	PF05730.6	CFEM	1.6e-14	48.7	10.8
Neonectria ditissima CBS 226.31	Prot_7356	PF05730.6	CFEM	3.7e-14	47.6	7.1
Neonectria ditissima CBS 226.31	Prot_5087	PF05730.6	CFEM	6.1e-08	27.7	9
Neonectria ditissima CBS 226.31	Prot_7509	PF05730.6	CFEM	0.0013	13.8	3.5
Neonectria ditissima CBS 226.31	Prot_3555	PF05730.6	CFEM	0.02	10	9.2
Neonectria ditissima CBS 226.31	Prot_4043	PF00187.14	Chitin_bind_1	2.5e-06	22.6	17.8
Neonectria ditissima CBS 226.31	Prot_13267	PF00187.14	Chitin_bind_1	5e-08	28.1	22.1
Neonectria ditissima CBS 226.31	Prot_10651	PF00187.14	Chitin_bind_1	2.7e-08	28.9	6.6
Neonectria ditissima CBS 226.31	Prot_4037	PF00187.14	Chitin_bind_1	7.5e-07	24.3	5.6
Neonectria ditissima CBS 226.31	Prot_973	PF00187.14	Chitin_bind_1	0.27	6.5	20.3
Neonectria ditissima CBS 226.31	Prot_13224	PF00187.14	Chitin_bind_1	0.033	9.5	11.3
Neonectria ditissima CBS 226.31	Prot_7570	PF03067.10	LPMO_10	0.0006	15.3	0
Neonectria ditissima CBS 226.31	Prot_6433	PF12740.2	Chlorophyllase2	0.0033	11.5	0
Neonectria ditissima CBS 226.31	Prot_6384	PF14592.1	Chondroitinas_B	2.1e-06	22	0
Neonectria ditissima CBS 226.31	Prot_9454	PF02417.10	Chromate_transp	0.004	12	0.1
Neonectria ditissima CBS 226.31	Prot_6537	PF08547.7	CIA30	0.0003	15.9	0
Neonectria ditissima CBS 226.31	Prot_12437	PF00878.13	CIMR	5.9e-06	21.3	0
Neonectria ditissima CBS 226.31	Prot_2116	PF12467.3	CMV_1a	0.12	8	13.3
Neonectria ditissima CBS 226.31	Prot_4082	PF00135.23	Coesterase	9.9e-111	366.2	0
Neonectria ditissima CBS 226.31	Prot_4016	PF00135.23	Coesterase	9.7e-101	333.2	0
Neonectria ditissima CBS 226.31	Prot_2414	PF00135.23	Coesterase	7.6e-100	330.3	0
Neonectria ditissima CBS 226.31	Prot_7995	PF00135.23	Coesterase	1.3e-99	329.4	0
Neonectria ditissima CBS 226.31	Prot_2303	PF00135.23	Coesterase	3.1e-94	311.7	0
Neonectria ditissima CBS 226.31	Prot_12744	PF00135.23	Coesterase	1.8e-92	305.9	0
Neonectria ditissima CBS 226.31	Prot_5418	PF00135.23	Coesterase	2.6e-92	305.4	0
Neonectria ditissima CBS 226.31	Prot_10463	PF00135.23	Coesterase	1.2e-90	299.9	0
Neonectria ditissima CBS 226.31	Prot_11742	PF00135.23	Coesterase	1.2e-74	247.1	2.1
Neonectria ditissima CBS 226.31	Prot_11680	PF00135.23	Coesterase	6.8e-72	238	0
Neonectria ditissima CBS 226.31	Prot_11809	PF05710.7	Coiled	0.055	9.2	0.3
Neonectria ditissima CBS 226.31	Prot_8213	PF02950.12	Conotoxin	0.14	8.2	3
Neonectria ditissima CBS 226.31	Prot_5742	PF00127.15	Copper-bind	0.00045	15.7	0
Neonectria ditissima CBS 226.31	Prot_189	PF07143.6	CrtC	3e-07	25.2	0.9
Neonectria ditissima CBS 226.31	Prot_3308	PF00030.14	Crystall	3.8e-08	28.4	0
Neonectria ditissima CBS 226.31	Prot_3308	PF08964.5	Crystall_3	1e-05	20.4	0
Neonectria ditissima CBS 226.31	Prot_7377	PF00394.17	Cu-oxidase	1.4e-35	117.7	0.1
Neonectria ditissima CBS 226.31	Prot_1860	PF00394.17	Cu-oxidase	5.1e-35	115.9	0.2
Neonectria ditissima CBS 226.31	Prot_196	PF00394.17	Cu-oxidase	2.1e-34	114	0
Neonectria ditissima CBS 226.31	Prot_7148	PF00394.17	Cu-oxidase	5.6e-14	47.5	0.1
Neonectria ditissima CBS 226.31	Prot_196	PF07731.9	Cu-oxidase_2	2.3e-41	135.8	0
Neonectria ditissima CBS 226.31	Prot_1860	PF07731.9	Cu-oxidase_2	1.5e-39	129.9	0.4
Neonectria ditissima CBS 226.31	Prot_7377	PF07731.9	Cu-oxidase_2	8e-38	124.3	0.3
Neonectria ditissima CBS 226.31	Prot_7148	PF07731.9	Cu-oxidase_2	7.1e-27	88.8	1.3
Neonectria ditissima CBS 226.31	Prot_7377	PF07732.10	Cu-oxidase_3	8.9e-44	143.2	0.8
Neonectria ditissima CBS 226.31	Prot_7148	PF07732.10	Cu-oxidase_3	3e-42	138.3	1.4
Neonectria ditissima CBS 226.31	Prot_1860	PF07732.10	Cu-oxidase_3	1.9e-39	129.3	1
Neonectria ditissima CBS 226.31	Prot_196	PF07732.10	Cu-oxidase_3	4e-32	105.7	0.1
Neonectria ditissima CBS 226.31	Prot_4377	PF00190.17	Cupin_1	3.3e-15	51	0
Neonectria ditissima CBS 226.31	Prot_4377	PF07883.6	Cupin_2	2.1e-14	48.1	0.1
Neonectria ditissima CBS 226.31	Prot_7355	PF07883.6	Cupin_2	2e-07	25.7	0.5
Neonectria ditissima CBS 226.31	Prot_4377	PF05899.7	Cupin_3	0.0022	12.6	0
Neonectria ditissima CBS 226.31	Prot_7355	PF05899.7	Cupin_3	0.018	9.7	0
Neonectria ditissima CBS 226.31	Prot_4377	PF08007.7	Cupin_4	0.0079	10.6	0
Neonectria ditissima CBS 226.31	Prot_4377	PF12852.2	Cupin_6	0.016	10	0
Neonectria ditissima CBS 226.31	Prot_5742	PF13473.1	Cupredoxin1	0.00042	15.4	0
Neonectria ditissima CBS 226.31	Prot_7377	PF13473.1	Cupredoxin1	0.31	6.2	0
Neonectria ditissima CBS 226.31	Prot_9475	PF13473.1	Cupredoxin1	0.0029	12.7	0
Neonectria ditissima CBS 226.31	Prot_196	PF13473.1	Cupredoxin1	0.011	10.9	0
Neonectria ditissima CBS 226.31	Prot_8968	PF01083.17	Cutinase	7.1e-54	177.4	7.7
Neonectria ditissima CBS 226.31	Prot_8213	PF01083.17	Cutinase	9.5e-52	170.5	10.7
Neonectria ditissima CBS 226.31	Prot_4660	PF01083.17	Cutinase	1.7e-48	159.9	0.5
Neonectria ditissima CBS 226.31	Prot_11019	PF01083.17	Cutinase	4.1e-44	145.7	1
Neonectria ditissima CBS 226.31	Prot_12496	PF01083.17	Cutinase	3.8e-42	139.2	0.1
Neonectria ditissima CBS 226.31	Prot_11436	PF01083.17	Cutinase	1.4e-14	49.4	0.1
Neonectria ditissima CBS 226.31	Prot_13186	PF01083.17	Cutinase	1.6e-05	19.9	1
Neonectria ditissima CBS 226.31	Prot_11850	PF01083.17	Cutinase	0.002	13.1	0
Neonectria ditissima CBS 226.31	Prot_2067	PF01179.15	Cu_amine_oxid	5.7e-111	366.3	5.2
Neonectria ditissima CBS 226.31	Prot_2067	PF02727.11	Cu_amine_oxidN2	2.4e-05	19.6	0
Neonectria ditissima CBS 226.31	Prot_7908	PF02298.12	Cu_bind_like	0.011	10.8	0.6
Neonectria ditissima CBS 226.31	Prot_5742	PF02298.12	Cu_bind_like	0.005	11.9	2.1
Neonectria ditissima CBS 226.31	Prot_12374	PF08881.5	CVNH	2.2e-11	39.2	0.2
Neonectria ditissima CBS 226.31	Prot_8683	PF08881.5	CVNH	0.0003	16.2	0
Neonectria ditissima CBS 226.31	Prot_9813	PF04889.7	Cwf_Cwc_15	0.0097	10.8	12.4
Neonectria ditissima CBS 226.31	Prot_6019	PF04889.7	Cwf_Cwc_15	0.32	5.9	9.6
Neonectria ditissima CBS 226.31	Prot_11332	PF04889.7	Cwf_Cwc_15	0.89	4.4	6
Neonectria ditissima CBS 226.31	Prot_2516	PF00173.23	Cyt-b5	0.052	8.6	0.1
Neonectria ditissima CBS 226.31	Prot_10097	PF07271.6	Cytadhesin_P30	1.3	3.4	11
Neonectria ditissima CBS 226.31	Prot_9153	PF09786.4	CytochromB561_N	3	1.3	24.3
Neonectria ditissima CBS 226.31	Prot_9395	PF09265.5	Cytokin-bind	0.00013	16.3	0
Neonectria ditissima CBS 226.31	Prot_1709	PF09265.5	Cytokin-bind	0.0031	11.9	0
Neonectria ditissima CBS 226.31	Prot_10735	PF05963.6	Cytomega_US3	0.0063	11.1	0
Neonectria ditissima CBS 226.31	Prot_3442	PF01266.19	DAO	4.1e-46	152.7	0
Neonectria ditissima CBS 226.31	Prot_3240	PF01266.19	DAO	5.2e-12	40.5	0
Neonectria ditissima CBS 226.31	Prot_2368	PF01266.19	DAO	2.3e-06	21.9	0
Neonectria ditissima CBS 226.31	Prot_8330	PF01266.19	DAO	1.6e-07	25.8	1
Neonectria ditissima CBS 226.31	Prot_2714	PF01266.19	DAO	7.9e-09	30	0.6
Neonectria ditissima CBS 226.31	Prot_142	PF01266.19	DAO	1.6e-08	29	2.5
Neonectria ditissima CBS 226.31	Prot_1280	PF01266.19	DAO	8.6e-07	23.3	0
Neonectria ditissima CBS 226.31	Prot_1147	PF01266.19	DAO	4.8e-07	24.2	0
Neonectria ditissima CBS 226.31	Prot_6333	PF01266.19	DAO	2.2e-06	22	0.1
Neonectria ditissima CBS 226.31	Prot_6403	PF01266.19	DAO	7.1e-05	17	0.1
Neonectria ditissima CBS 226.31	Prot_6931	PF01266.19	DAO	0.0011	13.1	0
Neonectria ditissima CBS 226.31	Prot_4822	PF01266.19	DAO	0.0027	11.8	1
Neonectria ditissima CBS 226.31	Prot_9830	PF01266.19	DAO	0.0079	10.3	0.2
Neonectria ditissima CBS 226.31	Prot_11543	PF07213.6	DAP10	0.048	8.7	0.1
Neonectria ditissima CBS 226.31	Prot_2070	PF03344.10	Daxx	2	1.9	24.5
Neonectria ditissima CBS 226.31	Prot_872	PF08841.5	DDR	0.0021	12.1	0.2
Neonectria ditissima CBS 226.31	Prot_11641	PF11040.3	DGF-1_C	0.43	5.8	1
Neonectria ditissima CBS 226.31	Prot_1127	PF01180.16	DHO_dh	1.2e-05	19.6	0.3
Neonectria ditissima CBS 226.31	Prot_13102	PF11492.3	Dicistro_VP4	0.00014	17.1	1.3
Neonectria ditissima CBS 226.31	Prot_5061	PF05086.7	Dicty_REP	0.29	4	7.4
Neonectria ditissima CBS 226.31	Prot_9813	PF05086.7	Dicty_REP	12	-1.4	13.3
Neonectria ditissima CBS 226.31	Prot_9039	PF00775.16	Dioxygenase_C	0.00038	15	0
Neonectria ditissima CBS 226.31	Prot_3279	PF08480.5	Disaggr_assoc	0.0011	13.6	0.6
Neonectria ditissima CBS 226.31	Prot_10579	PF01738.13	DLH	3.4e-06	21.7	0
Neonectria ditissima CBS 226.31	Prot_1387	PF01738.13	DLH	1.7e-05	19.4	0.2
Neonectria ditissima CBS 226.31	Prot_4700	PF12374.3	Dmrt1	2.4	3.9	0.3
Neonectria ditissima CBS 226.31	Prot_4494	PF14743.1	DNA_ligase_OB_2	0.0033	12.4	0
Neonectria ditissima CBS 226.31	Prot_4964	PF00242.12	DNA_pol_viral_N	3.9	1.6	20.1
Neonectria ditissima CBS 226.31	Prot_6193	PF00242.12	DNA_pol_viral_N	5.5	1.1	11.9
Neonectria ditissima CBS 226.31	Prot_4297	PF00242.12	DNA_pol_viral_N	9.2	0.3	21.6
Neonectria ditissima CBS 226.31	Prot_3450	PF03604.8	DNA_RNApol_7kD	1.5e-10	35.6	0.5
Neonectria ditissima CBS 226.31	Prot_11609	PF03330.13	DPBB_1	2.4e-07	25.9	0.2
Neonectria ditissima CBS 226.31	Prot_1635	PF00930.16	DPPIV_N	1.8e-106	350.9	1.1
Neonectria ditissima CBS 226.31	Prot_11561	PF01323.15	DSBA	0.18	6.5	0
Neonectria ditissima CBS 226.31	Prot_2093	PF12316.3	Dsh_C	0.054	8.8	23
Neonectria ditissima CBS 226.31	Prot_5261	PF06280.7	fn3_5	5.7e-09	31.6	0.1
Neonectria ditissima CBS 226.31	Prot_11536	PF06305.6	LapA_dom	0.028	9.2	0.1
Neonectria ditissima CBS 226.31	Prot_9063	PF06342.7	DUF1057	0.002	12.2	0
Neonectria ditissima CBS 226.31	Prot_7356	PF06380.6	DUF1072	4.6	2.3	3
Neonectria ditissima CBS 226.31	Prot_1287	PF06439.6	DUF1080	0.0011	14.1	0
Neonectria ditissima CBS 226.31	Prot_10527	PF01345.13	DUF11	0.0061	11.9	0.1
Neonectria ditissima CBS 226.31	Prot_10378	PF06500.6	DUF1100	0.00056	13.8	0
Neonectria ditissima CBS 226.31	Prot_8411	PF06679.7	DUF1180	0.8	4.8	10.2
Neonectria ditissima CBS 226.31	Prot_5983	PF06682.7	SARAF	4.3e-82	271.4	11.4
Neonectria ditissima CBS 226.31	Prot_11536	PF06697.7	DUF1191	0.0052	10.8	0
Neonectria ditissima CBS 226.31	Prot_973	PF06698.6	DUF1192	0.011	10.8	0.1
Neonectria ditissima CBS 226.31	Prot_3555	PF06724.6	DUF1206	0.0041	12.1	0.6
Neonectria ditissima CBS 226.31	Prot_832	PF07160.7	SKA1	0.039	8.6	1.4
Neonectria ditissima CBS 226.31	Prot_12349	PF07374.6	DUF1492	6	2.3	0.1
Neonectria ditissima CBS 226.31	Prot_8656	PF07438.6	DUF1514	0.6	5.3	7
Neonectria ditissima CBS 226.31	Prot_4684	PF07466.6	DUF1517	0.00076	13.7	1.4
Neonectria ditissima CBS 226.31	Prot_1831	PF07510.6	DUF1524	4.8e-14	47.6	0
Neonectria ditissima CBS 226.31	Prot_9373	PF07774.8	EMC1_C	6.5e-66	216.9	0
Neonectria ditissima CBS 226.31	Prot_6320	PF07793.6	DUF1631	0.13	5.5	5.4
Neonectria ditissima CBS 226.31	Prot_13224	PF07897.6	EAR	0.8	4.7	18.9
Neonectria ditissima CBS 226.31	Prot_4964	PF07897.6	EAR	25	-0.2	22
Neonectria ditissima CBS 226.31	Prot_6172	PF07944.7	Glyco_hydro_127	2.9e-139	459.9	0.2
Neonectria ditissima CBS 226.31	Prot_13224	PF08555.5	DUF1754	1.8	4.4	17.7
Neonectria ditissima CBS 226.31	Prot_13102	PF08895.6	DUF1840	0.29	6.4	0.6
Neonectria ditissima CBS 226.31	Prot_1287	PF09224.6	DUF1961	2.9e-81	266.9	0
Neonectria ditissima CBS 226.31	Prot_2067	PF09248.5	DUF1965	1.8e-21	71.1	0.2
Neonectria ditissima CBS 226.31	Prot_1737	PF09260.6	DUF1966	1.6e-29	97.1	0.5
Neonectria ditissima CBS 226.31	Prot_4212	PF09260.6	DUF1966	3.4e-05	19.1	0.1
Neonectria ditissima CBS 226.31	Prot_4494	PF09435.5	DUF2015	8.8e-48	156.5	0
Neonectria ditissima CBS 226.31	Prot_4297	PF09747.4	DUF2052	0.59	5.2	14.2
Neonectria ditissima CBS 226.31	Prot_11160	PF09849.4	DUF2076	0.00028	16.2	0.2
Neonectria ditissima CBS 226.31	Prot_6019	PF09849.4	DUF2076	0.36	6	9
Neonectria ditissima CBS 226.31	Prot_4349	PF09884.4	DUF2111	0.0026	12.8	0.4
Neonectria ditissima CBS 226.31	Prot_6986	PF09902.4	DUF2129	0.0031	12.6	0
Neonectria ditissima CBS 226.31	Prot_13036	PF09906.4	DUF2135	0.019	10.2	0.1
Neonectria ditissima CBS 226.31	Prot_9813	PF10220.4	Smg8_Smg9	1	2.3	9.8
Neonectria ditissima CBS 226.31	Prot_4297	PF10220.4	Smg8_Smg9	9	-0.8	16.5
Neonectria ditissima CBS 226.31	Prot_7513	PF09949.4	DUF2183		60.8	0.1
Neonectria ditissima CBS 226.31	Prot_2093	PF13203.1	DUF2201_N	0.022	9.1	6.9
Neonectria ditissima CBS 226.31	Prot_4660	PF09994.4	DUF2235	0.0055	11.3	0
Neonectria ditissima CBS 226.31	Prot_1720	PF10039.4	DUF2275	0.014	10.5	0
Neonectria ditissima CBS 226.31	Prot_1796	PF02995.12	DUF229	0.00014	15.6	0.2
Neonectria ditissima CBS 226.31	Prot_10478	PF10152.4	CCDC53	0.011	11.2	1.2
Neonectria ditissima CBS 226.31	Prot_2223	PF10287.4	DUF2401	0.0013	13.4	0.1
Neonectria ditissima CBS 226.31	Prot_4297	PF10310.4	DUF5427	0.73	3.7	29.1
Neonectria ditissima CBS 226.31	Prot_5061	PF10310.4	DUF5427	2.3	2.1	15
Neonectria ditissima CBS 226.31	Prot_5087	PF10667.4	DUF2486	0.15	7.8	26
Neonectria ditissima CBS 226.31	Prot_4012	PF10813.3	DUF2733	0.02	9.7	0.1
Neonectria ditissima CBS 226.31	Prot_10057	PF11191.3	DUF2782	0.061	8.6	0
Neonectria ditissima CBS 226.31	Prot_7944	PF10994.3	DUF2817	0.00021	15.7	0.1
Neonectria ditissima CBS 226.31	Prot_10378	PF11144.3	DUF2920	0.0067	10.6	0
Neonectria ditissima CBS 226.31	Prot_10818	PF11157.3	DUF2937	0.019	9.5	1.6
Neonectria ditissima CBS 226.31	Prot_11160	PF11162.3	DUF2946	0.0025	13.3	4.9
Neonectria ditissima CBS 226.31	Prot_8968	PF11187.3	DUF2974	0.00023	15.8	0.2
Neonectria ditissima CBS 226.31	Prot_2116	PF11240.3	DUF3042	0.26	6.4	0.6
Neonectria ditissima CBS 226.31	Prot_3161	PF11288.3	DUF3089	0.00075	13.9	0
Neonectria ditissima CBS 226.31	Prot_2359	PF11327.3	Egh16-like	3.8e-59	194.8	5.7
Neonectria ditissima CBS 226.31	Prot_10896	PF11337.3	DUF3139	0.00097	14.6	1.5
Neonectria ditissima CBS 226.31	Prot_1701	PF11578.3	DUF3237	1.5e-32	107.2	0.2
Neonectria ditissima CBS 226.31	Prot_6019	PF11595.3	DUF3245	0.18	7.3	7.3
Neonectria ditissima CBS 226.31	Prot_11641	PF11596.3	DUF3246	2.7e-05	18.8	19.9
Neonectria ditissima CBS 226.31	Prot_8914	PF11816.3	DUF3337	0.036	8.6	6.3
Neonectria ditissima CBS 226.31	Prot_11038	PF11899.3	DUF3419	2.4e-157	518.7	0.1
Neonectria ditissima CBS 226.31	Prot_1228	PF11937.3	DUF3455	3e-26	87.6	0
Neonectria ditissima CBS 226.31	Prot_5268	PF11944.3	DUF3461	0.00098	14.2	0
Neonectria ditissima CBS 226.31	Prot_3308	PF12131.3	DUF3586	0.001	14.3	2.6
Neonectria ditissima CBS 226.31	Prot_6083	PF12268.3	DUF3612	0.3	6.1	0
Neonectria ditissima CBS 226.31	Prot_2516	PF12396.3	DUF3659	1.3	4	0.1
Neonectria ditissima CBS 226.31	Prot_8816	PF12486.3	VasL	0.017	10	1.9
Neonectria ditissima CBS 226.31	Prot_2116	PF12877.2	DUF3827	0.043	7.1	12.2
Neonectria ditissima CBS 226.31	Prot_4505	PF12877.2	DUF3827	0.052	6.8	6.3
Neonectria ditissima CBS 226.31	Prot_11543	PF13770.1	DUF4169	0.002	13.3	3
Neonectria ditissima CBS 226.31	Prot_6072	PF13829.1	DUF4191	0.016	9.5	0.3
Neonectria ditissima CBS 226.31	Prot_2508	PF13961.1	DUF4219	0.00045	14.9	0.1
Neonectria ditissima CBS 226.31	Prot_9358	PF13961.1	DUF4219	0.058	8.1	0.3
Neonectria ditissima CBS 226.31	Prot_1637	PF14172.1	DUF4309	0.0032	12.7	0
Neonectria ditissima CBS 226.31	Prot_9803	PF14388.1	DUF4419	1.1e-22	75.8	0
Neonectria ditissima CBS 226.31	Prot_5087	PF15087.1	DUF4551	3.5	1	10.2
Neonectria ditissima CBS 226.31	Prot_12934	PF04307.9	YdjM	0.0015	13.1	2.9
Neonectria ditissima CBS 226.31	Prot_8872	PF15257.1	DUF4590	0.0022	13	0
Neonectria ditissima CBS 226.31	Prot_13102	PF15387.1	DUF4611	0.2	7.1	0.1
Neonectria ditissima CBS 226.31	Prot_10519	PF15391.1	DUF4614	4.7	2.1	14.2
Neonectria ditissima CBS 226.31	Prot_5935	PF04415.7	DUF515	0.00026	14.5	1.3
Neonectria ditissima CBS 226.31	Prot_4684	PF04415.7	DUF515	0.0063	9.9	4.6
Neonectria ditissima CBS 226.31	Prot_6470	PF04415.7	DUF515	1.3	2.3	12.2
Neonectria ditissima CBS 226.31	Prot_5061	PF04484.7	QWRF	0.36	5.5	17.1
Neonectria ditissima CBS 226.31	Prot_4964	PF04484.7	QWRF	0.58	4.8	20.9
Neonectria ditissima CBS 226.31	Prot_5087	PF04484.7	QWRF	0.69	4.5	20.7
Neonectria ditissima CBS 226.31	Prot_2116	PF04502.8	DUF572	0.16	6.3	9.6
Neonectria ditissima CBS 226.31	Prot_5087	PF04502.8	DUF572	4.9	1.4	14.9
Neonectria ditissima CBS 226.31	Prot_4297	PF04502.8	DUF572	13	0	27.8
Neonectria ditissima CBS 226.31	Prot_10478	PF04652.11	Vta1	3.2	2.2	13.8
Neonectria ditissima CBS 226.31	Prot_6675	PF05057.9	DUF676	0.0052	11.3	0
Neonectria ditissima CBS 226.31	Prot_6019	PF05097.7	DUF688	0.0069	10.5	0.4
Neonectria ditissima CBS 226.31	Prot_11701	PF05663.6	DUF809	520	-6.4	14.1
Neonectria ditissima CBS 226.31	Prot_9063	PF05990.7	DUF900	0.003	12.1	0
Neonectria ditissima CBS 226.31	Prot_4297	PF06025.7	DUF913	5.6	0.8	13.3
Neonectria ditissima CBS 226.31	Prot_9063	PF06028.6	DUF903	0.00088	13.6	0
Neonectria ditissima CBS 226.31	Prot_9153	PF06075.7	DUF936	2.8	1.9	27.1
Neonectria ditissima CBS 226.31	Prot_5166	PF06101.6	Vps62	6.6e-14	45.9	0.7
Neonectria ditissima CBS 226.31	Prot_2116	PF06136.8	DUF966	0.38	5.3	13.3
Neonectria ditissima CBS 226.31	Prot_4297	PF06136.8	DUF966	1.2	3.6	25.9
Neonectria ditissima CBS 226.31	Prot_7674	PF02221.10	E1_DerP2_DerF2	8.1e-26	86.1	0.1
Neonectria ditissima CBS 226.31	Prot_6675	PF13764.1	E3_UbLigase_R4	0.011	8.7	0
Neonectria ditissima CBS 226.31	Prot_2607	PF01683.13	EB	0.043	9.2	7.4
Neonectria ditissima CBS 226.31	Prot_4839	PF00008.22	EGF	0.004	12.4	6.8
Neonectria ditissima CBS 226.31	Prot_4839	PF07974.8	EGF_2	0.011	11.1	12.4
Neonectria ditissima CBS 226.31	Prot_4839	PF12947.2	EGF_3	0.034	9.4	5.7
Neonectria ditissima CBS 226.31	Prot_3187	PF06441.7	EHN	2e-29	97	0.2
Neonectria ditissima CBS 226.31	Prot_5742	PF00964.12	Elicitin	0.0021	13.3	0.9
Neonectria ditissima CBS 226.31	Prot_9039	PF01105.19	EMP24_GP25L	1.2e-46	154	0
Neonectria ditissima CBS 226.31	Prot_12448	PF12218.3	End_N_terminal	0.0024	12.6	0.8
Neonectria ditissima CBS 226.31	Prot_11543	PF14575.1	EphA2_TM	6.4e-05	18.5	0
Neonectria ditissima CBS 226.31	Prot_12513	PF14575.1	EphA2_TM	0.065	8.9	0
Neonectria ditissima CBS 226.31	Prot_11561	PF07749.7	ERp29	9.1e-26	85.6	0.4
Neonectria ditissima CBS 226.31	Prot_10254	PF00756.15	Esterase	0.00026	15.7	0.3
Neonectria ditissima CBS 226.31	Prot_10254	PF10503.4	Esterase_phd	1.4e-24	81.7	0.3
Neonectria ditissima CBS 226.31	Prot_2303	PF10503.4	Esterase_phd	0.00043	14.8	0
Neonectria ditissima CBS 226.31	Prot_1387	PF10503.4	Esterase_phd	5.8e-05	17.6	0.2
Neonectria ditissima CBS 226.31	Prot_2771	PF07110.6	EthD	1.3e-24	82.2	0.1
Neonectria ditissima CBS 226.31	Prot_5115	PF07110.6	EthD	1.7e-20	69	0.2
Neonectria ditissima CBS 226.31	Prot_6283	PF07110.6	EthD	0.0012	15	0
Neonectria ditissima CBS 226.31	Prot_2116	PF04621.8	ETS_PEA3_N	0.018	9.4	5.9
Neonectria ditissima CBS 226.31	Prot_1446	PF05901.6	Excalibur	0.4	6.3	0.5
Neonectria ditissima CBS 226.31	Prot_877	PF03372.18	Exo_endo_phos	5.1e-16	54.5	0.1
Neonectria ditissima CBS 226.31	Prot_5319	PF03372.18	Exo_endo_phos	9.7e-08	27.4	0.6
Neonectria ditissima CBS 226.31	Prot_877	PF14529.1	Exo_endo_phos_2	0.03	9.2	0.2
Neonectria ditissima CBS 226.31	Prot_8330	PF00890.19	FAD_binding_2	5.2e-09	30.6	0.3
Neonectria ditissima CBS 226.31	Prot_1280	PF00890.19	FAD_binding_2	7.7e-08	26.7	0.2
Neonectria ditissima CBS 226.31	Prot_2714	PF00890.19	FAD_binding_2	3.7e-09	31.1	3.4
Neonectria ditissima CBS 226.31	Prot_6403	PF00890.19	FAD_binding_2	5.1e-08	27.3	4.2
Neonectria ditissima CBS 226.31	Prot_6333	PF00890.19	FAD_binding_2	9.2e-09	29.8	0.3
Neonectria ditissima CBS 226.31	Prot_2368	PF00890.19	FAD_binding_2	0.0003	14.9	0.1
Neonectria ditissima CBS 226.31	Prot_1147	PF00890.19	FAD_binding_2	5.4e-06	20.7	0
Neonectria ditissima CBS 226.31	Prot_3442	PF00890.19	FAD_binding_2	3.5e-05	18	0
Neonectria ditissima CBS 226.31	Prot_9830	PF00890.19	FAD_binding_2	0.0011	13.1	0.1
Neonectria ditissima CBS 226.31	Prot_6931	PF00890.19	FAD_binding_2	0.0025	11.9	1.6
Neonectria ditissima CBS 226.31	Prot_142	PF00890.19	FAD_binding_2	0.0082	10.2	0.1
Neonectria ditissima CBS 226.31	Prot_4822	PF00890.19	FAD_binding_2	0.0035	11.4	1.7
Neonectria ditissima CBS 226.31	Prot_6931	PF01494.14	FAD_binding_3	1.3e-16	55.8	0
Neonectria ditissima CBS 226.31	Prot_1280	PF01494.14	FAD_binding_3	3.4e-07	24.8	0.2
Neonectria ditissima CBS 226.31	Prot_2714	PF01494.14	FAD_binding_3	4.1e-07	24.5	0.4
Neonectria ditissima CBS 226.31	Prot_8330	PF01494.14	FAD_binding_3	0.00014	16.2	0.3
Neonectria ditissima CBS 226.31	Prot_6333	PF01494.14	FAD_binding_3	6.9e-05	17.2	0
Neonectria ditissima CBS 226.31	Prot_2368	PF01494.14	FAD_binding_3	7.7e-05	17.1	0.1
Neonectria ditissima CBS 226.31	Prot_3442	PF01494.14	FAD_binding_3	0.00058	14.2	0
Neonectria ditissima CBS 226.31	Prot_3240	PF01494.14	FAD_binding_3	0.00099	13.4	0.4
Neonectria ditissima CBS 226.31	Prot_1147	PF01494.14	FAD_binding_3	0.0023	12.2	0
Neonectria ditissima CBS 226.31	Prot_3803	PF01565.18	FAD_binding_4	1.7e-26	87.6	4.6
Neonectria ditissima CBS 226.31	Prot_8021	PF01565.18	FAD_binding_4	2.1e-26	87.3	0.9
Neonectria ditissima CBS 226.31	Prot_13557	PF01565.18	FAD_binding_4	6.8e-26	85.6	0.7
Neonectria ditissima CBS 226.31	Prot_8791	PF01565.18	FAD_binding_4	8.3e-23	75.6	0.2
Neonectria ditissima CBS 226.31	Prot_8060	PF01565.18	FAD_binding_4	3.4e-22	73.6	2.7
Neonectria ditissima CBS 226.31	Prot_4070	PF01565.18	FAD_binding_4	9.3e-22	72.2	1.1
Neonectria ditissima CBS 226.31	Prot_5417	PF01565.18	FAD_binding_4	4.3e-19	63.6	0.2
Neonectria ditissima CBS 226.31	Prot_9395	PF01565.18	FAD_binding_4	2.9e-21	70.6	4.5
Neonectria ditissima CBS 226.31	Prot_13485	PF01565.18	FAD_binding_4	8.9e-21	69	0.8
Neonectria ditissima CBS 226.31	Prot_11721	PF01565.18	FAD_binding_4	1.1e-18	62.3	8.8
Neonectria ditissima CBS 226.31	Prot_4031	PF01565.18	FAD_binding_4	6e-19	63.1	0.5
Neonectria ditissima CBS 226.31	Prot_1709	PF01565.18	FAD_binding_4	4e-18	60.5	0.4
Neonectria ditissima CBS 226.31	Prot_4000	PF01565.18	FAD_binding_4	1e-17	59.2	0.8
Neonectria ditissima CBS 226.31	Prot_4081	PF01565.18	FAD_binding_4	8.6e-18	59.4	0.7
Neonectria ditissima CBS 226.31	Prot_8330	PF12831.2	FAD_oxidored	2.6e-10	35.1	0.5
Neonectria ditissima CBS 226.31	Prot_2714	PF12831.2	FAD_oxidored	9.4e-09	30	3.1
Neonectria ditissima CBS 226.31	Prot_1280	PF12831.2	FAD_oxidored	1.8e-07	25.7	1.6
Neonectria ditissima CBS 226.31	Prot_6333	PF12831.2	FAD_oxidored	1.2e-05	19.8	0
Neonectria ditissima CBS 226.31	Prot_1147	PF12831.2	FAD_oxidored	1.7e-05	19.2	0
Neonectria ditissima CBS 226.31	Prot_2368	PF12831.2	FAD_oxidored	0.0017	12.7	0
Neonectria ditissima CBS 226.31	Prot_5087	PF15265.1	FAM196	0.53	4.6	15.7
Neonectria ditissima CBS 226.31	Prot_9153	PF15265.1	FAM196	0.62	4.4	28.7
Neonectria ditissima CBS 226.31	Prot_6786	PF02469.17	Fasciclin	9.3e-18	59.7	0
Neonectria ditissima CBS 226.31	Prot_13066	PF04116.8	FA_hydroxylase	9.5e-09	30.9	5.5
Neonectria ditissima CBS 226.31	Prot_3715	PF14691.1	Fer4_20	0.34	5.8	0.1
Neonectria ditissima CBS 226.31	Prot_1721	PF01839.18	FG-GAP	9.4e-05	17.3	0.4
Neonectria ditissima CBS 226.31	Prot_1388	PF01839.18	FG-GAP	6.9e-05	17.7	1.7
Neonectria ditissima CBS 226.31	Prot_6357	PF01839.18	FG-GAP	0.0031	12.5	3.1
Neonectria ditissima CBS 226.31	Prot_872	PF02782.11	FGGY_C	0.0068	11.2	0
Neonectria ditissima CBS 226.31	Prot_8951	PF05182.8	Fip1	0.002	12.6	0.5
Neonectria ditissima CBS 226.31	Prot_8365	PF00254.23	FKBP_C	3e-33	109	0
Neonectria ditissima CBS 226.31	Prot_8446	PF08884.6	Flagellin_D3	0.11	7.9	0.5
Neonectria ditissima CBS 226.31	Prot_8914	PF01005.14	Flavi_NS2A	0.0029	12.1	0.1
Neonectria ditissima CBS 226.31	Prot_13343	PF02465.13	FliD_N	0.0012	14.4	0.1
Neonectria ditissima CBS 226.31	Prot_1127	PF01070.13	FMN_dh	3.2e-111	366.8	0
Neonectria ditissima CBS 226.31	Prot_4662	PF14310.1	Fn3-like	2.6e-23	77	0.1
Neonectria ditissima CBS 226.31	Prot_9067	PF14686.1	fn3_3	1.7e-18	61.8	2.9
Neonectria ditissima CBS 226.31	Prot_1735	PF14686.1	fn3_3	2.3e-15	51.8	3.9
Neonectria ditissima CBS 226.31	Prot_1035	PF14686.1	fn3_3	8.5e-14	46.7	1.6
Neonectria ditissima CBS 226.31	Prot_7836	PF14686.1	fn3_3	1.1e-10	36.7	0.3
Neonectria ditissima CBS 226.31	Prot_8816	PF02434.11	Fringe	8e-06	20.4	1.7
Neonectria ditissima CBS 226.31	Prot_12896	PF02434.11	Fringe	0.00064	14.2	0
Neonectria ditissima CBS 226.31	Prot_13343	PF04961.7	FTCD_C	0.0035	12	0
Neonectria ditissima CBS 226.31	Prot_872	PF14450.1	FtsA	0.18	6.9	0.2
Neonectria ditissima CBS 226.31	Prot_11070	PF01392.17	FZ	0.03	9.9	0.6
Neonectria ditissima CBS 226.31	Prot_3281	PF13975.1	gag-asp_proteas	0.013	10.6	0
Neonectria ditissima CBS 226.31	Prot_4703	PF13802.1	Gal_mutarotas_2	1.2e-25	84.4	0.2
Neonectria ditissima CBS 226.31	Prot_10115	PF06202.9	GDE_C	0.0001	16.3	0
Neonectria ditissima CBS 226.31	Prot_10410	PF02351.11	GDNF	0.00072	15.3	1.8
Neonectria ditissima CBS 226.31	Prot_4212	PF14871.1	GHL6	0.001	14.3	0
Neonectria ditissima CBS 226.31	Prot_2714	PF01134.17	GIDA	6.9e-07	23.6	1.4
Neonectria ditissima CBS 226.31	Prot_1280	PF01134.17	GIDA	4.7e-06	20.9	0.2
Neonectria ditissima CBS 226.31	Prot_8330	PF01134.17	GIDA	3e-05	18.2	0.2
Neonectria ditissima CBS 226.31	Prot_1147	PF01134.17	GIDA	0.00019	15.6	0
Neonectria ditissima CBS 226.31	Prot_142	PF01134.17	GIDA	0.2	5.6	0.6
Neonectria ditissima CBS 226.31	Prot_5313	PF01832.15	Glucosaminidase	0.13	7.6	0.2
Neonectria ditissima CBS 226.31	Prot_11561	PF00462.19	Glutaredoxin	1	4.7	0.1
Neonectria ditissima CBS 226.31	Prot_1127	PF01645.12	Glu_synthase	2.3e-08	28.5	0.1
Neonectria ditissima CBS 226.31	Prot_5789	PF14845.1	Glycohydro_20b2	5.1e-24	80.6	0
Neonectria ditissima CBS 226.31	Prot_8103	PF00232.13	Glyco_hydro_1	1.2e-76	252.9	0.4
Neonectria ditissima CBS 226.31	Prot_7135	PF00331.15	Glyco_hydro_10	7e-97	319.5	0
Neonectria ditissima CBS 226.31	Prot_5935	PF00457.12	Glyco_hydro_11	4.6e-82	269	20.3
Neonectria ditissima CBS 226.31	Prot_11513	PF00457.12	Glyco_hydro_11	5.3e-82	268.8	20.9
Neonectria ditissima CBS 226.31	Prot_8976	PF01670.11	Glyco_hydro_12	5.2e-31	102.8	1.7
Neonectria ditissima CBS 226.31	Prot_8233	PF01670.11	Glyco_hydro_12	2.6e-30	100.5	1.7
Neonectria ditissima CBS 226.31	Prot_3201	PF01670.11	Glyco_hydro_12	4.8e-08	28.2	0.5
Neonectria ditissima CBS 226.31	Prot_13224	PF00722.16	Glyco_hydro_16	7.7e-46	150.9	2.2
Neonectria ditissima CBS 226.31	Prot_1713	PF00722.16	Glyco_hydro_16	4.6e-44	145.1	2
Neonectria ditissima CBS 226.31	Prot_13036	PF00722.16	Glyco_hydro_16	9.5e-43	140.8	7.4
Neonectria ditissima CBS 226.31	Prot_4297	PF00722.16	Glyco_hydro_16	1.4e-41	137	1.2
Neonectria ditissima CBS 226.31	Prot_3269	PF00722.16	Glyco_hydro_16	2.5e-40	132.9	0.8
Neonectria ditissima CBS 226.31	Prot_2223	PF00722.16	Glyco_hydro_16	1e-19	65.7	0.1
Neonectria ditissima CBS 226.31	Prot_9873	PF00722.16	Glyco_hydro_16	3.4e-19	64	0.3
Neonectria ditissima CBS 226.31	Prot_11291	PF00722.16	Glyco_hydro_16	1.3e-17	58.9	0.1
Neonectria ditissima CBS 226.31	Prot_3629	PF00722.16	Glyco_hydro_16	1.2e-16	55.7	0
Neonectria ditissima CBS 226.31	Prot_1642	PF00722.16	Glyco_hydro_16	1.8e-12	42.1	0.3
Neonectria ditissima CBS 226.31	Prot_12109	PF00722.16	Glyco_hydro_16	2.5e-12	41.7	4.7
Neonectria ditissima CBS 226.31	Prot_3099	PF00332.13	Glyco_hydro_17	7.5e-16	53.2	0.1
Neonectria ditissima CBS 226.31	Prot_9454	PF00332.13	Glyco_hydro_17	0.00047	14.5	0
Neonectria ditissima CBS 226.31	Prot_1955	PF00332.13	Glyco_hydro_17	1.6e-05	19.3	0.1
Neonectria ditissima CBS 226.31	Prot_11796	PF00704.23	Glyco_hydro_18	7.6e-93	306.8	10.3
Neonectria ditissima CBS 226.31	Prot_2441	PF00704.23	Glyco_hydro_18	3.6e-91	301.3	9.4
Neonectria ditissima CBS 226.31	Prot_10651	PF00704.23	Glyco_hydro_18	1.8e-63	210.2	3.4
Neonectria ditissima CBS 226.31	Prot_4037	PF00704.23	Glyco_hydro_18	1.4e-48	161.3	6.6
Neonectria ditissima CBS 226.31	Prot_13267	PF00704.23	Glyco_hydro_18	5.7e-47	156	0.4
Neonectria ditissima CBS 226.31	Prot_5789	PF00728.17	Glyco_hydro_20	3.6e-92	304.4	0
Neonectria ditissima CBS 226.31	Prot_10769	PF00728.17	Glyco_hydro_20	0.0064	10.9	0.1
Neonectria ditissima CBS 226.31	Prot_5789	PF02838.10	Glyco_hydro_20b	1.1e-07	27.7	0
Neonectria ditissima CBS 226.31	Prot_4349	PF00295.12	Glyco_hydro_28	1.1e-106	351.6	20.3
Neonectria ditissima CBS 226.31	Prot_3289	PF00295.12	Glyco_hydro_28	6.6e-96	316.2	17.3
Neonectria ditissima CBS 226.31	Prot_6546	PF00295.12	Glyco_hydro_28	1.4e-91	302	16.9
Neonectria ditissima CBS 226.31	Prot_4732	PF00295.12	Glyco_hydro_28	6.1e-47	155.3	5.4
Neonectria ditissima CBS 226.31	Prot_6311	PF00295.12	Glyco_hydro_28	9.1e-43	141.6	0.1
Neonectria ditissima CBS 226.31	Prot_5376	PF00295.12	Glyco_hydro_28	3.8e-42	139.6	4.6
Neonectria ditissima CBS 226.31	Prot_138	PF00295.12	Glyco_hydro_28	1.4e-24	81.8	0.1
Neonectria ditissima CBS 226.31	Prot_7017	PF02836.12	Glyco_hydro_2_C	1.1e-07	26.2	0.1
Neonectria ditissima CBS 226.31	Prot_4662	PF00933.16	Glyco_hydro_3	9.2e-83	272.8	0
Neonectria ditissima CBS 226.31	Prot_4703	PF01055.21	Glyco_hydro_31	1.4e-155	513.6	3.4
Neonectria ditissima CBS 226.31	Prot_9964	PF01055.21	Glyco_hydro_31	1.9e-135	447.3	2.9
Neonectria ditissima CBS 226.31	Prot_10615	PF00251.15	Glyco_hydro_32N	1.3e-05	19.9	0
Neonectria ditissima CBS 226.31	Prot_9836	PF00251.15	Glyco_hydro_32N	0.001	13.7	0.3
Neonectria ditissima CBS 226.31	Prot_5232	PF01301.14	Glyco_hydro_35	8e-81	267	1.2
Neonectria ditissima CBS 226.31	Prot_4662	PF01915.17	Glyco_hydro_3_C	2.5e-41	136.9	0
Neonectria ditissima CBS 226.31	Prot_11698	PF02056.11	Glyco_hydro_4	0.05	8.1	0.2
Neonectria ditissima CBS 226.31	Prot_7017	PF02449.10	Glyco_hydro_42	0.00025	15.4	0
Neonectria ditissima CBS 226.31	Prot_1456	PF04616.9	Glyco_hydro_43	9.2e-65	213.7	0.2
Neonectria ditissima CBS 226.31	Prot_3221	PF04616.9	Glyco_hydro_43	1.4e-63	209.8	8.1
Neonectria ditissima CBS 226.31	Prot_10615	PF04616.9	Glyco_hydro_43	2e-55	183.1	1.8
Neonectria ditissima CBS 226.31	Prot_9836	PF04616.9	Glyco_hydro_43	6.8e-50	164.9	3.8
Neonectria ditissima CBS 226.31	Prot_3675	PF04616.9	Glyco_hydro_43	2.6e-43	143.3	6
Neonectria ditissima CBS 226.31	Prot_8446	PF04616.9	Glyco_hydro_43	4.3e-37	122.9	6
Neonectria ditissima CBS 226.31	Prot_128	PF04616.9	Glyco_hydro_43	1.4e-33	111.4	4.1
Neonectria ditissima CBS 226.31	Prot_11202	PF04616.9	Glyco_hydro_43	5.4e-20	66.8	2.6
Neonectria ditissima CBS 226.31	Prot_2186	PF04616.9	Glyco_hydro_43	0.0011	13.3	0.8
Neonectria ditissima CBS 226.31	Prot_10812	PF07745.8	Glyco_hydro_53	2.9e-107	353.5	0.1
Neonectria ditissima CBS 226.31	Prot_4182	PF01341.12	Glyco_hydro_6	1.3e-109	361.4	3
Neonectria ditissima CBS 226.31	Prot_3196	PF03443.9	Glyco_hydro_61	4.3e-76	250.7	0
Neonectria ditissima CBS 226.31	Prot_7830	PF03443.9	Glyco_hydro_61	1.2e-75	249.3	0.6
Neonectria ditissima CBS 226.31	Prot_10915	PF03443.9	Glyco_hydro_61	1.1e-59	197.1	0.1
Neonectria ditissima CBS 226.31	Prot_1563	PF03443.9	Glyco_hydro_61	2.4e-52	173.1	0
Neonectria ditissima CBS 226.31	Prot_2077	PF03632.10	Glyco_hydro_65m	0.0015	12.5	0
Neonectria ditissima CBS 226.31	Prot_4306	PF00840.15	Glyco_hydro_7	4.6e-157	518	9.6
Neonectria ditissima CBS 226.31	Prot_4212	PF02324.11	Glyco_hydro_70	0.006	9.5	0.1
Neonectria ditissima CBS 226.31	Prot_10213	PF03198.9	Glyco_hydro_72	1.1e-111	368.1	1.6
Neonectria ditissima CBS 226.31	Prot_2607	PF07335.6	Glyco_hydro_75	1.8e-47	156.4	0.3
Neonectria ditissima CBS 226.31	Prot_842	PF07335.6	Glyco_hydro_75	3.3e-45	149	0.1
Neonectria ditissima CBS 226.31	Prot_9604	PF03663.9	Glyco_hydro_76	1.6e-18	62.4	0.1
Neonectria ditissima CBS 226.31	Prot_831	PF07470.8	Glyco_hydro_88	1.5e-15	52.3	1.2
Neonectria ditissima CBS 226.31	Prot_3223	PF10566.4	Glyco_hydro_97	0.0076	10.5	0.2
Neonectria ditissima CBS 226.31	Prot_8951	PF11790.3	Glyco_hydro_cc	7.1e-69	227	0.6
Neonectria ditissima CBS 226.31	Prot_8103	PF11790.3	Glyco_hydro_cc	3.2e-05	18.7	0.5
Neonectria ditissima CBS 226.31	Prot_2077	PF14498.1	Glyco_hyd_65N_2	0.0015	13.4	0
Neonectria ditissima CBS 226.31	Prot_1451	PF05637.7	Glyco_transf_34	1e-16	56.4	0.1
Neonectria ditissima CBS 226.31	Prot_12112	PF00903.20	Glyoxalase	1.9e-11	39.3	0
Neonectria ditissima CBS 226.31	Prot_12112	PF12681.2	Glyoxalase_2	9e-09	31.2	0
Neonectria ditissima CBS 226.31	Prot_6292	PF12681.2	Glyoxalase_2	0.016	11.1	0
Neonectria ditissima CBS 226.31	Prot_12112	PF13669.1	Glyoxalase_4	0.0031	12.8	0
Neonectria ditissima CBS 226.31	Prot_7908	PF01153.14	Glypican	0.0056	10.5	0.2
Neonectria ditissima CBS 226.31	Prot_9270	PF04488.10	Gly_transf_sug	4.2e-10	35.2	0
Neonectria ditissima CBS 226.31	Prot_10478	PF04488.10	Gly_transf_sug	1.3e-09	33.6	0
Neonectria ditissima CBS 226.31	Prot_142	PF05199.8	GMC_oxred_C	3.4e-43	142.6	0
Neonectria ditissima CBS 226.31	Prot_9830	PF05199.8	GMC_oxred_C	9.6e-33	108.7	0
Neonectria ditissima CBS 226.31	Prot_4822	PF05199.8	GMC_oxred_C	9.1e-29	95.8	0
Neonectria ditissima CBS 226.31	Prot_6403	PF05199.8	GMC_oxred_C	2.2e-23	78.4	0.5
Neonectria ditissima CBS 226.31	Prot_1280	PF05199.8	GMC_oxred_C	1.5e-21	72.4	0.1
Neonectria ditissima CBS 226.31	Prot_2368	PF05199.8	GMC_oxred_C	1.7e-20	69	0.3
Neonectria ditissima CBS 226.31	Prot_142	PF00732.14	GMC_oxred_N	7.3e-56	184.7	0.4
Neonectria ditissima CBS 226.31	Prot_9830	PF00732.14	GMC_oxred_N	1.9e-23	78.2	0
Neonectria ditissima CBS 226.31	Prot_2368	PF00732.14	GMC_oxred_N	7.4e-33	109.1	0
Neonectria ditissima CBS 226.31	Prot_6403	PF00732.14	GMC_oxred_N	9.3e-29	95.7	0.1
Neonectria ditissima CBS 226.31	Prot_4822	PF00732.14	GMC_oxred_N	6.2e-25	83.1	0
Neonectria ditissima CBS 226.31	Prot_1280	PF00732.14	GMC_oxred_N	3.8e-27	90.4	0
Neonectria ditissima CBS 226.31	Prot_1147	PF00732.14	GMC_oxred_N	0.0084	10.5	0
Neonectria ditissima CBS 226.31	Prot_2093	PF09787.4	Golgin_A5	4.1	0.9	12.1
Neonectria ditissima CBS 226.31	Prot_3956	PF10342.4	GPI-anchored	4e-20	67.4	0
Neonectria ditissima CBS 226.31	Prot_1405	PF10342.4	GPI-anchored	2.5e-18	61.6	0.3
Neonectria ditissima CBS 226.31	Prot_1130	PF07995.6	GSDH	2.2e-08	28.8	0.6
Neonectria ditissima CBS 226.31	Prot_8411	PF04388.7	Hamartin	0.14	6	7.2
Neonectria ditissima CBS 226.31	Prot_5087	PF04388.7	Hamartin	5	0.8	15.1
Neonectria ditissima CBS 226.31	Prot_128	PF06594.6	HCBP_related	0.016	10.1	0
Neonectria ditissima CBS 226.31	Prot_9117	PF14856.1	Hce2	7.6e-14	46.7	0.1
Neonectria ditissima CBS 226.31	Prot_4212	PF14701.1	hDGE_amylase	0.0032	11.6	0
Neonectria ditissima CBS 226.31	Prot_6083	PF12949.2	HeH	0.0014	13.4	0
Neonectria ditissima CBS 226.31	Prot_11030	PF01814.18	Hemerythrin	1.9e-10	36.2	0.2
Neonectria ditissima CBS 226.31	Prot_10896	PF07219.8	HemY_N	0.00044	15	0
Neonectria ditissima CBS 226.31	Prot_13093	PF06112.6	Herpes_capsid	2.1	3.6	15
Neonectria ditissima CBS 226.31	Prot_6847	PF06112.6	Herpes_capsid	6	2.1	13.9
Neonectria ditissima CBS 226.31	Prot_11543	PF02480.11	Herpes_gE	0.0024	11.4	0
Neonectria ditissima CBS 226.31	Prot_4755	PF03326.8	Herpes_TAF50	0.019	9.1	13.4
Neonectria ditissima CBS 226.31	Prot_10915	PF03326.8	Herpes_TAF50	0.063	7.4	8.4
Neonectria ditissima CBS 226.31	Prot_10818	PF06985.6	HET	1.1e-24	82.4	0
Neonectria ditissima CBS 226.31	Prot_1280	PF03486.9	HI0933_like	3.6e-08	27.5	0.2
Neonectria ditissima CBS 226.31	Prot_2714	PF03486.9	HI0933_like	2.8e-07	24.5	3.2
Neonectria ditissima CBS 226.31	Prot_2368	PF03486.9	HI0933_like	9.4e-07	22.8	0
Neonectria ditissima CBS 226.31	Prot_8330	PF03486.9	HI0933_like	1.3e-06	22.4	0.1
Neonectria ditissima CBS 226.31	Prot_6403	PF03486.9	HI0933_like	9.3e-06	19.5	0.2
Neonectria ditissima CBS 226.31	Prot_1147	PF03486.9	HI0933_like	2.3e-05	18.2	0
Neonectria ditissima CBS 226.31	Prot_6333	PF03486.9	HI0933_like	2.2e-05	18.3	0.3
Neonectria ditissima CBS 226.31	Prot_3442	PF03486.9	HI0933_like	0.0097	9.6	0
Neonectria ditissima CBS 226.31	Prot_5061	PF12722.2	Hid1	0.017	7.9	3.8
Neonectria ditissima CBS 226.31	Prot_5087	PF12722.2	Hid1	1.8	1.3	8.9
Neonectria ditissima CBS 226.31	Prot_1127	PF00977.16	His_biosynth	0.0011	13.4	0.1
Neonectria ditissima CBS 226.31	Prot_10350	PF00300.17	His_Phos_1	0.0039	12.5	0
Neonectria ditissima CBS 226.31	Prot_13177	PF00328.17	His_Phos_2	1.5e-08	29.6	0
Neonectria ditissima CBS 226.31	Prot_8365	PF09682.5	Phage_holin_6_1	0.003	12.9	0.2
Neonectria ditissima CBS 226.31	Prot_1596	PF13933.1	HRXXH	2.4e-108	356.4	0
Neonectria ditissima CBS 226.31	Prot_11705	PF12296.3	HsbA	0.00025	16.1	4.1
Neonectria ditissima CBS 226.31	Prot_872	PF00012.15	HSP70	1.2e-258	854.2	17.6
Neonectria ditissima CBS 226.31	Prot_3309	PF13443.1	HTH_26	0.0052	12.2	0
Neonectria ditissima CBS 226.31	Prot_872	PF01968.13	Hydantoinase_A	0.0008	13.8	0.1
Neonectria ditissima CBS 226.31	Prot_11850	PF12146.3	Hydrolase_4	1.7e-05	19.9	0.1
Neonectria ditissima CBS 226.31	Prot_6240	PF12146.3	Hydrolase_4	0.00012	17.2	0
Neonectria ditissima CBS 226.31	Prot_9063	PF12146.3	Hydrolase_4	0.00035	15.6	0
Neonectria ditissima CBS 226.31	Prot_6675	PF12146.3	Hydrolase_4	0.0025	12.9	0.1
Neonectria ditissima CBS 226.31	Prot_1709	PF11765.3	Hyphal_reg_CWP	0.0042	11	0.2
Neonectria ditissima CBS 226.31	Prot_2714	PF07991.7	IlvN	0.0051	11.4	0.5
Neonectria ditissima CBS 226.31	Prot_1127	PF00478.20	IMPDH	1.1e-07	26.2	0.4
Neonectria ditissima CBS 226.31	Prot_3100	PF05922.11	Inhibitor_I9	2.7e-16	55.2	0.2
Neonectria ditissima CBS 226.31	Prot_2373	PF05922.11	Inhibitor_I9	6.4e-16	54	0
Neonectria ditissima CBS 226.31	Prot_4832	PF05922.11	Inhibitor_I9	4.4e-14	48.1	0
Neonectria ditissima CBS 226.31	Prot_7083	PF05922.11	Inhibitor_I9	1e-13	46.9	0
Neonectria ditissima CBS 226.31	Prot_12650	PF05922.11	Inhibitor_I9	6e-05	18.8	0.1
Neonectria ditissima CBS 226.31	Prot_4700	PF12782.2	Innate_immun	0.0031	11.9	0.3
Neonectria ditissima CBS 226.31	Prot_13066	PF14750.1	INTS2	0.0074	9	0.2
Neonectria ditissima CBS 226.31	Prot_6083	PF10281.4	Ish1	2.6e-14	48.3	0.3
Neonectria ditissima CBS 226.31	Prot_5319	PF01419.12	Jacalin	1.2e-06	23.6	0
Neonectria ditissima CBS 226.31	Prot_11698	PF03957.8	Jun	0.014	10.3	6
Neonectria ditissima CBS 226.31	Prot_11909	PF06293.9	Kdo	0.00026	15.3	0
Neonectria ditissima CBS 226.31	Prot_10030	PF08552.6	Kei1	1	4.2	2.8
Neonectria ditissima CBS 226.31	Prot_6421	PF01344.20	Kelch_1	9.1e-09	30	0
Neonectria ditissima CBS 226.31	Prot_6072	PF01344.20	Kelch_1	0.0033	12.2	0.1
Neonectria ditissima CBS 226.31	Prot_6421	PF07646.10	Kelch_2	7.9e-06	20.8	0
Neonectria ditissima CBS 226.31	Prot_6421	PF13415.1	Kelch_3	6.4e-07	24.7	0
Neonectria ditissima CBS 226.31	Prot_6072	PF13415.1	Kelch_3	7.3e-05	18.1	0.1
Neonectria ditissima CBS 226.31	Prot_6421	PF13418.1	Kelch_4	3e-09	31.8	0
Neonectria ditissima CBS 226.31	Prot_6421	PF13854.1	Kelch_5	0.0054	12	0.1
Neonectria ditissima CBS 226.31	Prot_6072	PF13854.1	Kelch_5	7.4e-12	40.3	0.6
Neonectria ditissima CBS 226.31	Prot_138	PF13854.1	Kelch_5	0.0086	11.3	0.2
Neonectria ditissima CBS 226.31	Prot_6421	PF13964.1	Kelch_6	1.7e-08	29.6	0
Neonectria ditissima CBS 226.31	Prot_6072	PF13964.1	Kelch_6	0.12	7.9	0.1
Neonectria ditissima CBS 226.31	Prot_5087	PF15369.1	KIAA1328	0.15	7	11
Neonectria ditissima CBS 226.31	Prot_9269	PF15033.1	Kinocilin	0.0017	13.1	0
Neonectria ditissima CBS 226.31	Prot_6333	PF13434.1	K_oxygenase	0.00026	15.2	0
Neonectria ditissima CBS 226.31	Prot_1147	PF13434.1	K_oxygenase	0.017	9.2	0
Neonectria ditissima CBS 226.31	Prot_3442	PF13434.1	K_oxygenase	0.0067	10.5	0
Neonectria ditissima CBS 226.31	Prot_8202	PF10282.4	Lactonase	0.0004	14.7	0
Neonectria ditissima CBS 226.31	Prot_6986	PF13385.1	Laminin_G_3	0.00095	14.6	4.9
Neonectria ditissima CBS 226.31	Prot_6083	PF02987.11	LEA_4	0.019	10.1	1.6
Neonectria ditissima CBS 226.31	Prot_4644	PF03388.8	Lectin_leg-like	6e-62	204	0
Neonectria ditissima CBS 226.31	Prot_4644	PF00139.14	Lectin_legB	0.0064	11.1	0
Neonectria ditissima CBS 226.31	Prot_9374	PF15042.1	LELP1	0.0088	11.5	8.4
Neonectria ditissima CBS 226.31	Prot_6083	PF03020.10	LEM	0.82	4.5	0
Neonectria ditissima CBS 226.31	Prot_10579	PF15221.1	LEP503	0.0071	11.3	0
Neonectria ditissima CBS 226.31	Prot_12374	PF14411.1	LHH	0.57	5.7	0
Neonectria ditissima CBS 226.31	Prot_3372	PF02900.13	LigB	1.4e-51	170.3	0.2
Neonectria ditissima CBS 226.31	Prot_2116	PF03353.10	Lin-8	0.09	7.2	6.9
Neonectria ditissima CBS 226.31	Prot_4964	PF03353.10	Lin-8	0.5	4.8	11.4
Neonectria ditissima CBS 226.31	Prot_5087	PF03353.10	Lin-8	2.5	2.5	10.2
Neonectria ditissima CBS 226.31	Prot_4726	PF03583.9	LIP	2.3e-74	245.4	0.6
Neonectria ditissima CBS 226.31	Prot_11705	PF03583.9	LIP	0.034	8.5	0
Neonectria ditissima CBS 226.31	Prot_13186	PF03893.11	Lipase3_N	8e-05	17.7	0
Neonectria ditissima CBS 226.31	Prot_3161	PF03893.11	Lipase3_N	0.0025	12.9	0.1
Neonectria ditissima CBS 226.31	Prot_13186	PF01764.20	Lipase_3	8.3e-39	127.6	0
Neonectria ditissima CBS 226.31	Prot_8968	PF01764.20	Lipase_3	1.6e-05	19.7	0.1
Neonectria ditissima CBS 226.31	Prot_6433	PF01764.20	Lipase_3	0.00044	15.1	0.1
Neonectria ditissima CBS 226.31	Prot_11436	PF01764.20	Lipase_3	0.0017	13.2	0
Neonectria ditissima CBS 226.31	Prot_9063	PF01764.20	Lipase_3	0.0071	11.2	0
Neonectria ditissima CBS 226.31	Prot_7944	PF00657.17	Lipase_GDSL	9.4e-22	73.2	0.3
Neonectria ditissima CBS 226.31	Prot_5180	PF00657.17	Lipase_GDSL	3.1e-13	45.3	0
Neonectria ditissima CBS 226.31	Prot_1450	PF00657.17	Lipase_GDSL	1.6e-12	43	0.2
Neonectria ditissima CBS 226.31	Prot_4515	PF00657.17	Lipase_GDSL	4.2e-12	41.6	2.2
Neonectria ditissima CBS 226.31	Prot_1388	PF00657.17	Lipase_GDSL	2.2e-10	35.9	0.2
Neonectria ditissima CBS 226.31	Prot_1721	PF00657.17	Lipase_GDSL	2.5e-10	35.7	0
Neonectria ditissima CBS 226.31	Prot_1624	PF00657.17	Lipase_GDSL	1.4e-09	33.3	0
Neonectria ditissima CBS 226.31	Prot_12115	PF00657.17	Lipase_GDSL	1.6e-07	26.6	0.7
Neonectria ditissima CBS 226.31	Prot_1271	PF00657.17	Lipase_GDSL	3.1e-06	22.4	0.1
Neonectria ditissima CBS 226.31	Prot_12139	PF00657.17	Lipase_GDSL	4.4e-05	18.6	4.6
Neonectria ditissima CBS 226.31	Prot_1271	PF13472.1	Lipase_GDSL_2	3.8e-18	61.5	0.2
Neonectria ditissima CBS 226.31	Prot_12139	PF13472.1	Lipase_GDSL_2	8.5e-16	53.8	0.1
Neonectria ditissima CBS 226.31	Prot_7944	PF13472.1	Lipase_GDSL_2	9e-16	53.7	0
Neonectria ditissima CBS 226.31	Prot_12115	PF13472.1	Lipase_GDSL_2	1.3e-14	50	1.3
Neonectria ditissima CBS 226.31	Prot_1388	PF13472.1	Lipase_GDSL_2	2e-13	46	0.1
Neonectria ditissima CBS 226.31	Prot_1624	PF13472.1	Lipase_GDSL_2	2.5e-13	45.8	0
Neonectria ditissima CBS 226.31	Prot_1721	PF13472.1	Lipase_GDSL_2	7.7e-11	37.6	0.1
Neonectria ditissima CBS 226.31	Prot_4515	PF13472.1	Lipase_GDSL_2	9.1e-11	37.4	0.4
Neonectria ditissima CBS 226.31	Prot_7944	PF14606.1	Lipase_GDSL_3	3.3e-12	41.7	0
Neonectria ditissima CBS 226.31	Prot_1721	PF14606.1	Lipase_GDSL_3	9.2e-06	20.7	0.1
Neonectria ditissima CBS 226.31	Prot_5087	PF04791.11	LMBR1	0.0092	9.8	0.1
Neonectria ditissima CBS 226.31	Prot_3309	PF02169.11	LPP20	0.0008	14.7	0.8
Neonectria ditissima CBS 226.31	Prot_6931	PF05834.7	Lycopene_cycl	1.8e-06	22.3	0.9
Neonectria ditissima CBS 226.31	Prot_142	PF05834.7	Lycopene_cycl	8.6e-06	20.1	0.2
Neonectria ditissima CBS 226.31	Prot_2368	PF05834.7	Lycopene_cycl	9.7e-06	19.9	0
Neonectria ditissima CBS 226.31	Prot_1280	PF05834.7	Lycopene_cycl	2.7e-05	18.4	0.2
Neonectria ditissima CBS 226.31	Prot_2714	PF05834.7	Lycopene_cycl	0.00049	14.3	0.3
Neonectria ditissima CBS 226.31	Prot_6403	PF05834.7	Lycopene_cycl	0.0001	16.5	0
Neonectria ditissima CBS 226.31	Prot_6333	PF05834.7	Lycopene_cycl	0.00094	13.3	0
Neonectria ditissima CBS 226.31	Prot_8330	PF05834.7	Lycopene_cycl	0.0016	12.6	0
Neonectria ditissima CBS 226.31	Prot_1147	PF05834.7	Lycopene_cycl	0.00039	14.6	0
Neonectria ditissima CBS 226.31	Prot_4822	PF05834.7	Lycopene_cycl	0.0012	12.9	0
Neonectria ditissima CBS 226.31	Prot_9830	PF05834.7	Lycopene_cycl	0.0038	11.3	0
Neonectria ditissima CBS 226.31	Prot_4037	PF01476.15	LysM	2.2e-07	25.9	0
Neonectria ditissima CBS 226.31	Prot_6176	PF01476.15	LysM	4.8e-06	21.6	0
Neonectria ditissima CBS 226.31	Prot_6529	PF01476.15	LysM	8.2e-09	30.5	0
Neonectria ditissima CBS 226.31	Prot_5692	PF07687.9	M20_dimer	3.8e-10	34.8	0
Neonectria ditissima CBS 226.31	Prot_11332	PF09726.4	Macoilin	0.012	9.1	9.5
Neonectria ditissima CBS 226.31	Prot_12372	PF09726.4	Macoilin	0.025	8	5.7
Neonectria ditissima CBS 226.31	Prot_5061	PF09726.4	Macoilin	0.027	7.9	16.5
Neonectria ditissima CBS 226.31	Prot_2116	PF09726.4	Macoilin	0.077	6.4	14.3
Neonectria ditissima CBS 226.31	Prot_9813	PF09726.4	Macoilin	0.13	5.6	23.6
Neonectria ditissima CBS 226.31	Prot_8826	PF09726.4	Macoilin	0.18	5.2	11.6
Neonectria ditissima CBS 226.31	Prot_2093	PF09726.4	Macoilin	0.21	5	20.3
Neonectria ditissima CBS 226.31	Prot_4505	PF09726.4	Macoilin	0.44	3.9	9.1
Neonectria ditissima CBS 226.31	Prot_1578	PF09726.4	Macoilin	0.49	3.8	9.7
Neonectria ditissima CBS 226.31	Prot_8914	PF09726.4	Macoilin	0.87	2.9	7.7
Neonectria ditissima CBS 226.31	Prot_1713	PF09726.4	Macoilin	1.1	2.6	12.2
Neonectria ditissima CBS 226.31	Prot_1955	PF09726.4	Macoilin	3.3	1	16.2
Neonectria ditissima CBS 226.31	Prot_4964	PF09726.4	Macoilin	4.5	0.6	21
Neonectria ditissima CBS 226.31	Prot_13036	PF09726.4	Macoilin	6	0.2	13.4
Neonectria ditissima CBS 226.31	Prot_5087	PF09726.4	Macoilin	8.9	-0.4	23.2
Neonectria ditissima CBS 226.31	Prot_4297	PF09726.4	Macoilin	7.4	-0.1	28
Neonectria ditissima CBS 226.31	Prot_12437	PF02157.10	Man-6-P_recep	5.5e-11	37.2	0
Neonectria ditissima CBS 226.31	Prot_10057	PF05934.6	MCLC	0.083	6.3	4.9
Neonectria ditissima CBS 226.31	Prot_3555	PF11593.3	Med3	0.18	6.2	14.8
Neonectria ditissima CBS 226.31	Prot_12496	PF11593.3	Med3	1.1	3.5	13.4
Neonectria ditissima CBS 226.31	Prot_10915	PF11593.3	Med3	1.4	3.2	22.8
Neonectria ditissima CBS 226.31	Prot_1563	PF11593.3	Med3	3.4	1.9	19.5
Neonectria ditissima CBS 226.31	Prot_11974	PF11593.3	Med3	3.6	1.9	18.2
Neonectria ditissima CBS 226.31	Prot_3223	PF02065.13	Melibiase	3e-18	60.8	0.1
Neonectria ditissima CBS 226.31	Prot_4297	PF03547.13	Mem_trans	10	-0.6	13
Neonectria ditissima CBS 226.31	Prot_5087	PF05053.8	Menin	0.18	5.1	12
Neonectria ditissima CBS 226.31	Prot_9470	PF00149.23	Metallophos	4.7e-30	99.7	0.1
Neonectria ditissima CBS 226.31	Prot_11038	PF08241.7	Methyltransf_11	4.2e-05	19.2	0
Neonectria ditissima CBS 226.31	Prot_11038	PF08242.7	Methyltransf_12	1.1e-09	33.9	0
Neonectria ditissima CBS 226.31	Prot_11038	PF12847.2	Methyltransf_18	1.4e-10	37	0
Neonectria ditissima CBS 226.31	Prot_11038	PF13489.1	Methyltransf_23	1.9e-13	45.7	0
Neonectria ditissima CBS 226.31	Prot_4339	PF13578.1	Methyltransf_24	0.0048	13	0.1
Neonectria ditissima CBS 226.31	Prot_11038	PF13649.1	Methyltransf_25	2.8e-06	22.9	0
Neonectria ditissima CBS 226.31	Prot_11038	PF13659.1	?	7.5e-07	24.4	0
Neonectria ditissima CBS 226.31	Prot_11038	PF13847.1	Methyltransf_31	1.9e-10	35.8	0
Neonectria ditissima CBS 226.31	Prot_11038	PF13679.1	Methyltransf_32	8.6e-05	17.5	0
Neonectria ditissima CBS 226.31	Prot_11038	PF02390.12	Methyltransf_4	0.0094	10.2	0
Neonectria ditissima CBS 226.31	Prot_7509	PF05283.6	MGC-24	0.24	6.4	15.1
Neonectria ditissima CBS 226.31	Prot_11070	PF12929.2	Mid1	1.6e-129	427.5	8.4
Neonectria ditissima CBS 226.31	Prot_9153	PF04478.7	Mid2	2.2e-07	25.6	3
Neonectria ditissima CBS 226.31	Prot_4684	PF04478.7	Mid2	0.00079	14.1	0.2
Neonectria ditissima CBS 226.31	Prot_5087	PF09731.4	Mitofilin	0.0014	12.6	9.9
Neonectria ditissima CBS 226.31	Prot_4297	PF09731.4	Mitofilin	0.52	4	26.6
Neonectria ditissima CBS 226.31	Prot_6374	PF05308.6	Mito_fiss_reg	0.18	6.3	13.3
Neonectria ditissima CBS 226.31	Prot_872	PF06723.8	MreB_MbI	2.8e-16	54.2	1.7
Neonectria ditissima CBS 226.31	Prot_5061	PF15325.1	MRI	2.5	4.4	8.5
Neonectria ditissima CBS 226.31	Prot_12496	PF12238.3	MSA-2c	0.00046	15.1	1.2
Neonectria ditissima CBS 226.31	Prot_10030	PF07462.6	MSP1_C	0.015	8.8	0.2
Neonectria ditissima CBS 226.31	Prot_12496	PF07462.6	MSP1_C	1.3	2.4	8.2
Neonectria ditissima CBS 226.31	Prot_5622	PF07462.6	MSP1_C	9.2	-0.3	14.3
Neonectria ditissima CBS 226.31	Prot_11543	PF09472.5	MtrF	0.021	9.4	2.6
Neonectria ditissima CBS 226.31	Prot_5742	PF01456.12	Mucin	0.0063	11.5	15.6
Neonectria ditissima CBS 226.31	Prot_6470	PF01456.12	Mucin	0.099	7.6	30.2
Neonectria ditissima CBS 226.31	Prot_12496	PF01456.12	Mucin	0.029	9.4	13.8
Neonectria ditissima CBS 226.31	Prot_2714	PF13241.1	NAD_binding_7	0.00055	15.4	0.2
Neonectria ditissima CBS 226.31	Prot_3240	PF13241.1	NAD_binding_7	0.003	13	0
Neonectria ditissima CBS 226.31	Prot_8330	PF13450.1	NAD_binding_8	2e-13	45.5	0.7
Neonectria ditissima CBS 226.31	Prot_2714	PF13450.1	NAD_binding_8	1.9e-11	39.1	0.2
Neonectria ditissima CBS 226.31	Prot_6333	PF13450.1	NAD_binding_8	2.6e-11	38.6	0.1
Neonectria ditissima CBS 226.31	Prot_1147	PF13450.1	NAD_binding_8	4.2e-07	25.2	0.1
Neonectria ditissima CBS 226.31	Prot_3442	PF13450.1	NAD_binding_8	1.7e-06	23.2	0.1
Neonectria ditissima CBS 226.31	Prot_2368	PF13450.1	NAD_binding_8	2.6e-06	22.7	0
Neonectria ditissima CBS 226.31	Prot_1280	PF13450.1	NAD_binding_8	5.3e-06	21.6	0.3
Neonectria ditissima CBS 226.31	Prot_6403	PF13450.1	NAD_binding_8	4.4e-05	18.7	0.1
Neonectria ditissima CBS 226.31	Prot_6931	PF13450.1	NAD_binding_8	6.7e-05	18.1	0.2
Neonectria ditissima CBS 226.31	Prot_4822	PF13450.1	NAD_binding_8	0.00054	15.2	0
Neonectria ditissima CBS 226.31	Prot_9830	PF13450.1	NAD_binding_8	0.00079	14.7	0.1
Neonectria ditissima CBS 226.31	Prot_142	PF13450.1	NAD_binding_8	0.0015	13.7	0.6
Neonectria ditissima CBS 226.31	Prot_3442	PF13454.1	NAD_binding_9	0.00088	14.3	0
Neonectria ditissima CBS 226.31	Prot_6333	PF13454.1	NAD_binding_9	0.0039	12.2	0
Neonectria ditissima CBS 226.31	Prot_8330	PF13454.1	NAD_binding_9	0.14	7.1	0.1
Neonectria ditissima CBS 226.31	Prot_1280	PF13454.1	NAD_binding_9	0.012	10.6	0.3
Neonectria ditissima CBS 226.31	Prot_2714	PF13454.1	NAD_binding_9	0.021	9.8	0.6
Neonectria ditissima CBS 226.31	Prot_142	PF13454.1	NAD_binding_9	0.052	8.5	0.3
Neonectria ditissima CBS 226.31	Prot_9063	PF03096.9	Ndr	1.6e-07	25.3	0
Neonectria ditissima CBS 226.31	Prot_6403	PF06567.6	Neural_ProG_Cyt	0.013	10.8	0
Neonectria ditissima CBS 226.31	Prot_6931	PF02931.18	Neur_chan_LBD	0.0034	11.8	0.1
Neonectria ditissima CBS 226.31	Prot_1130	PF01436.16	NHL	0.47	5.9	0
Neonectria ditissima CBS 226.31	Prot_169	PF01436.16	NHL	1.3	4.5	0
Neonectria ditissima CBS 226.31	Prot_1574	PF01436.16	NHL	1.5	4.2	0
Neonectria ditissima CBS 226.31	Prot_953	PF01436.16	NHL	0.1	7.9	0
Neonectria ditissima CBS 226.31	Prot_5313	PF05450.10	Nicastrin	0.012	10.1	0
Neonectria ditissima CBS 226.31	Prot_3372	PF10126.4	Nit_Regul_Hom	0.015	10.4	0
Neonectria ditissima CBS 226.31	Prot_1127	PF03060.10	NMO	5.2e-05	17.7	1.1
Neonectria ditissima CBS 226.31	Prot_9475	PF06524.7	NOA36	0.043	8.2	5.4
Neonectria ditissima CBS 226.31	Prot_8714	PF06524.7	NOA36	0.59	4.5	7.5
Neonectria ditissima CBS 226.31	Prot_2093	PF04147.7	Nop14	0.17	4.9	10.3
Neonectria ditissima CBS 226.31	Prot_13224	PF04147.7	Nop14	8.3	-0.7	21.2
Neonectria ditissima CBS 226.31	Prot_3279	PF05048.8	NosD	3.4e-10	34.7	8.9
Neonectria ditissima CBS 226.31	Prot_5376	PF05048.8	NosD	0.00022	15.6	3.1
Neonectria ditissima CBS 226.31	Prot_7901	PF05630.6	NPP1	2e-64	212.3	0
Neonectria ditissima CBS 226.31	Prot_2093	PF03666.8	NPR3	2.4	1.7	8.9
Neonectria ditissima CBS 226.31	Prot_13343	PF05531.7	NPV_P10	0.00064	15.2	0.1
Neonectria ditissima CBS 226.31	Prot_2415	PF03066.10	Nucleoplasmin	0.038	8.7	0
Neonectria ditissima CBS 226.31	Prot_3147	PF14815.1	NUDIX_4	0.037	8.7	0.2
Neonectria ditissima CBS 226.31	Prot_8976	PF02462.10	Opacity	0.0034	12.5	0.3
Neonectria ditissima CBS 226.31	Prot_11012	PF00278.17	Orn_DAP_Arg_deC	0.0025	12.8	0
Neonectria ditissima CBS 226.31	Prot_4297	PF03189.8	Otopetrin	11	0	11.6
Neonectria ditissima CBS 226.31	Prot_10896	PF12669.2	FeoB_associated	0.0041	12.6	0.1
Neonectria ditissima CBS 226.31	Prot_1637	PF02225.17	PA	1.2e-18	61.9	0.2
Neonectria ditissima CBS 226.31	Prot_1578	PF07691.7	PA14	2.3e-09	32.3	0.1
Neonectria ditissima CBS 226.31	Prot_1578	PF10528.4	GLEYA	2e-12	42.3	0.2
Neonectria ditissima CBS 226.31	Prot_4297	PF04636.8	PA26	6.3	0.5	17.1
Neonectria ditissima CBS 226.31	Prot_10812	PF08223.6	PaaX_C	0.0025	12.7	0
Neonectria ditissima CBS 226.31	Prot_6433	PF03403.8	PAF-AH_p_II	4.3e-11	36.9	0
Neonectria ditissima CBS 226.31	Prot_10579	PF03403.8	PAF-AH_p_II	0.012	9.1	0
Neonectria ditissima CBS 226.31	Prot_4179	PF00024.21	PAN_1	7.1e-09	30.6	0
Neonectria ditissima CBS 226.31	Prot_13024	PF00024.21	PAN_1	3.4e-05	18.8	1.4
Neonectria ditissima CBS 226.31	Prot_3715	PF08276.6	PAN_2	0.002	13.2	0.6
Neonectria ditissima CBS 226.31	Prot_11641	PF08276.6	PAN_2	5.6e-05	18.2	0.1
Neonectria ditissima CBS 226.31	Prot_298	PF08276.6	PAN_2	0.0001	17.3	0.2
Neonectria ditissima CBS 226.31	Prot_4964	PF08276.6	PAN_2	0.0002	16.4	0.7
Neonectria ditissima CBS 226.31	Prot_2931	PF08276.6	PAN_2	0.01	10.9	2.5
Neonectria ditissima CBS 226.31	Prot_3450	PF08277.7	PAN_3	6.1e-07	24.2	0.3
Neonectria ditissima CBS 226.31	Prot_11641	PF08277.7	PAN_3	0.0002	16.2	0
Neonectria ditissima CBS 226.31	Prot_13024	PF08277.7	PAN_3	0.00062	14.6	0.1
Neonectria ditissima CBS 226.31	Prot_3715	PF08277.7	PAN_3	0.00073	14.4	0.3
Neonectria ditissima CBS 226.31	Prot_9844	PF08277.7	PAN_3	0.00095	14	0.1
Neonectria ditissima CBS 226.31	Prot_4964	PF08277.7	PAN_3	0.011	10.6	0.3
Neonectria ditissima CBS 226.31	Prot_3715	PF14295.1	PAN_4	2e-06	22.7	1
Neonectria ditissima CBS 226.31	Prot_11641	PF14295.1	PAN_4	4.3e-06	21.6	0.3
Neonectria ditissima CBS 226.31	Prot_4964	PF14295.1	PAN_4	9.2e-06	20.6	0.7
Neonectria ditissima CBS 226.31	Prot_298	PF14295.1	PAN_4	6.1e-05	17.9	0.2
Neonectria ditissima CBS 226.31	Prot_8816	PF14295.1	PAN_4	0.00029	15.8	1.7
Neonectria ditissima CBS 226.31	Prot_2931	PF14295.1	PAN_4	0.00035	15.5	1.2
Neonectria ditissima CBS 226.31	Prot_9844	PF14295.1	PAN_4	0.0009	14.2	0.1
Neonectria ditissima CBS 226.31	Prot_3450	PF14295.1	PAN_4	0.0018	13.2	3.9
Neonectria ditissima CBS 226.31	Prot_13024	PF14295.1	PAN_4	0.0017	13.3	2.8
Neonectria ditissima CBS 226.31	Prot_4964	PF08601.5	PAP1	6.6	1.5	29.6
Neonectria ditissima CBS 226.31	Prot_4742	PF05870.6	PA_decarbox	5.7e-10	34.1	0.4
Neonectria ditissima CBS 226.31	Prot_11641	PF14812.1	PBP1_TM	0.063	8.9	1.6
Neonectria ditissima CBS 226.31	Prot_11038	PF01135.14	PCMT	5.4e-06	21.3	0
Neonectria ditissima CBS 226.31	Prot_1127	PF01884.12	PcrB	0.047	8.1	0.5
Neonectria ditissima CBS 226.31	Prot_13177	PF13190.1	PDGLE	0.0064	11.4	0
Neonectria ditissima CBS 226.31	Prot_8213	PF08237.6	PE-PPE	4.6e-07	24.7	0.2
Neonectria ditissima CBS 226.31	Prot_4660	PF08237.6	PE-PPE	1.7e-06	22.8	0
Neonectria ditissima CBS 226.31	Prot_8968	PF08237.6	PE-PPE	3.3e-06	21.9	0.3
Neonectria ditissima CBS 226.31	Prot_12496	PF08237.6	PE-PPE	7.2e-06	20.8	0
Neonectria ditissima CBS 226.31	Prot_11019	PF08237.6	PE-PPE	1.2e-05	20	0
Neonectria ditissima CBS 226.31	Prot_11102	PF03211.8	Pectate_lyase	4.5e-80	263.3	7.5
Neonectria ditissima CBS 226.31	Prot_4018	PF03211.8	Pectate_lyase	8.3e-76	249.3	5.2
Neonectria ditissima CBS 226.31	Prot_1492	PF03211.8	Pectate_lyase	1.7e-64	212.3	7.6
Neonectria ditissima CBS 226.31	Prot_12448	PF12708.2	Pectate_lyase_3	1.1e-67	223.7	6.2
Neonectria ditissima CBS 226.31	Prot_138	PF12708.2	Pectate_lyase_3	1.1e-08	30.7	7.8
Neonectria ditissima CBS 226.31	Prot_12342	PF01095.14	Pectinesterase	3.2e-43	142.6	0
Neonectria ditissima CBS 226.31	Prot_12359	PF01095.14	Pectinesterase	6.2e-27	89.1	0.2
Neonectria ditissima CBS 226.31	Prot_841	PF00544.14	Pec_lyase_C	2.1e-41	136.8	2.8
Neonectria ditissima CBS 226.31	Prot_11123	PF00544.14	Pec_lyase_C	1.7e-22	75.1	9.2
Neonectria ditissima CBS 226.31	Prot_12270	PF00544.14	Pec_lyase_C	8.8e-22	72.7	5
Neonectria ditissima CBS 226.31	Prot_3826	PF00544.14	Pec_lyase_C	2.2e-20	68.2	7.5
Neonectria ditissima CBS 226.31	Prot_11974	PF00544.14	Pec_lyase_C	6.9e-17	56.8	0.9
Neonectria ditissima CBS 226.31	Prot_1446	PF00544.14	Pec_lyase_C	0.00086	14	4.4
Neonectria ditissima CBS 226.31	Prot_4180	PF08182.6	Pedibin	0.00086	14	0.9
Neonectria ditissima CBS 226.31	Prot_4092	PF05927.6	Penaeidin	0.0024	13.6	0.4
Neonectria ditissima CBS 226.31	Prot_9480	PF01650.13	Peptidase_C13	2.9e-37	123.5	0.3
Neonectria ditissima CBS 226.31	Prot_2379	PF00413.19	Peptidase_M10	0.00072	14.5	0
Neonectria ditissima CBS 226.31	Prot_8826	PF00413.19	Peptidase_M10	0.0012	13.8	0
Neonectria ditissima CBS 226.31	Prot_4339	PF00246.19	Peptidase_M14	1.8e-70	232.9	0
Neonectria ditissima CBS 226.31	Prot_680	PF00246.19	Peptidase_M14	5.4e-67	221.5	0
Neonectria ditissima CBS 226.31	Prot_6232	PF00246.19	Peptidase_M14	3.1e-45	150.1	0.5
Neonectria ditissima CBS 226.31	Prot_1127	PF01244.16	Peptidase_M19	0.0036	11.5	0
Neonectria ditissima CBS 226.31	Prot_5692	PF01546.23	Peptidase_M20	2.3e-24	81.1	0
Neonectria ditissima CBS 226.31	Prot_5313	PF01546.23	Peptidase_M20	2.7e-07	25.5	0
Neonectria ditissima CBS 226.31	Prot_5313	PF04389.12	Peptidase_M28	2.1e-37	123.8	0.1
Neonectria ditissima CBS 226.31	Prot_1637	PF04389.12	Peptidase_M28	3.9e-36	119.7	0
Neonectria ditissima CBS 226.31	Prot_2379	PF05572.8	Peptidase_M43	5.6e-16	53.7	0.1
Neonectria ditissima CBS 226.31	Prot_8826	PF05572.8	Peptidase_M43	7.1e-09	30.7	0.5
Neonectria ditissima CBS 226.31	Prot_2379	PF12388.3	Peptidase_M57	0.0074	10.8	0.2
Neonectria ditissima CBS 226.31	Prot_2379	PF10462.4	Peptidase_M66	0.0062	10.6	0.1
Neonectria ditissima CBS 226.31	Prot_9016	PF01457.11	Peptidase_M8	0.0018	11.9	0.1
Neonectria ditissima CBS 226.31	Prot_7416	PF13485.1	Peptidase_MA_2	3e-06	22.5	1.2
Neonectria ditissima CBS 226.31	Prot_5908	PF13485.1	Peptidase_MA_2	7.2e-05	18.1	0
Neonectria ditissima CBS 226.31	Prot_249	PF13485.1	Peptidase_MA_2	9.7e-05	17.6	0
Neonectria ditissima CBS 226.31	Prot_1274	PF00450.17	Peptidase_S10	3.4e-102	337.8	2.5
Neonectria ditissima CBS 226.31	Prot_10404	PF00450.17	Peptidase_S10	2.4e-98	325.2	1.5
Neonectria ditissima CBS 226.31	Prot_1538	PF00450.17	Peptidase_S10	1.2e-78	260.3	0
Neonectria ditissima CBS 226.31	Prot_3153	PF00450.17	Peptidase_S10	1.6e-65	217.1	5.7
Neonectria ditissima CBS 226.31	Prot_1387	PF02129.13	Peptidase_S15	1.9e-08	29.3	0.1
Neonectria ditissima CBS 226.31	Prot_10579	PF02129.13	Peptidase_S15	0.00032	15.4	0.1
Neonectria ditissima CBS 226.31	Prot_11850	PF02129.13	Peptidase_S15	0.00084	14	0.1
Neonectria ditissima CBS 226.31	Prot_2545	PF05577.7	Peptidase_S28	3.2e-39	129.9	0
Neonectria ditissima CBS 226.31	Prot_5951	PF05577.7	Peptidase_S28	2e-50	166.8	0
Neonectria ditissima CBS 226.31	Prot_1276	PF05577.7	Peptidase_S28	1.4e-45	150.8	0.1
Neonectria ditissima CBS 226.31	Prot_4391	PF03572.13	Peptidase_S41	2.5e-06	22.2	0
Neonectria ditissima CBS 226.31	Prot_2116	PF08192.6	Peptidase_S64	0.9	2.9	14.1
Neonectria ditissima CBS 226.31	Prot_7083	PF00082.17	Peptidase_S8	9e-50	164.6	11.6
Neonectria ditissima CBS 226.31	Prot_3100	PF00082.17	Peptidase_S8	1.6e-47	157.1	9.9
Neonectria ditissima CBS 226.31	Prot_5261	PF00082.17	Peptidase_S8	4.2e-46	152.5	2.5
Neonectria ditissima CBS 226.31	Prot_12650	PF00082.17	Peptidase_S8	4.8e-44	145.8	13.1
Neonectria ditissima CBS 226.31	Prot_4832	PF00082.17	Peptidase_S8	5.5e-41	135.7	11.4
Neonectria ditissima CBS 226.31	Prot_2373	PF00082.17	Peptidase_S8	2.6e-40	133.5	14.5
Neonectria ditissima CBS 226.31	Prot_1635	PF00326.16	Peptidase_S9	9.4e-38	124.8	1
Neonectria ditissima CBS 226.31	Prot_10254	PF00326.16	Peptidase_S9	8.1e-11	36.7	3.7
Neonectria ditissima CBS 226.31	Prot_10378	PF00326.16	Peptidase_S9	3.8e-06	21.5	0
Neonectria ditissima CBS 226.31	Prot_10579	PF00326.16	Peptidase_S9	1.9e-05	19.2	0
Neonectria ditissima CBS 226.31	Prot_11742	PF00326.16	Peptidase_S9	1.8e-05	19.3	0.1
Neonectria ditissima CBS 226.31	Prot_6345	PF00326.16	Peptidase_S9	0.025	9	0
Neonectria ditissima CBS 226.31	Prot_3161	PF00326.16	Peptidase_S9	0.0043	11.5	0
Neonectria ditissima CBS 226.31	Prot_9063	PF00326.16	Peptidase_S9	0.039	8.3	0
Neonectria ditissima CBS 226.31	Prot_2414	PF00326.16	Peptidase_S9	0.00017	16	0
Neonectria ditissima CBS 226.31	Prot_1387	PF00326.16	Peptidase_S9	0.0012	13.3	0
Neonectria ditissima CBS 226.31	Prot_11680	PF00326.16	Peptidase_S9	0.0013	13.2	0.2
Neonectria ditissima CBS 226.31	Prot_2303	PF00326.16	Peptidase_S9	0.0016	12.9	0
Neonectria ditissima CBS 226.31	Prot_5951	PF00326.16	Peptidase_S9	0.0066	10.9	0.1
Neonectria ditissima CBS 226.31	Prot_4082	PF00326.16	Peptidase_S9	0.0066	10.9	0.1
Neonectria ditissima CBS 226.31	Prot_6433	PF00326.16	Peptidase_S9	0.0082	10.6	0.2
Neonectria ditissima CBS 226.31	Prot_7908	PF12114.3	Period_C	1.1	4	9.6
Neonectria ditissima CBS 226.31	Prot_11332	PF12114.3	Period_C	2.1	3.1	16.6
Neonectria ditissima CBS 226.31	Prot_8872	PF12114.3	Period_C	5.4	1.8	12
Neonectria ditissima CBS 226.31	Prot_4812	PF00141.18	peroxidase	4e-49	162.3	0
Neonectria ditissima CBS 226.31	Prot_6021	PF00141.18	peroxidase	3.3e-24	80.8	0.1
Neonectria ditissima CBS 226.31	Prot_10047	PF00141.18	peroxidase	1.2e-23	79	0.3
Neonectria ditissima CBS 226.31	Prot_12734	PF04695.8	PEX14_N	4.6	2.5	14.9
Neonectria ditissima CBS 226.31	Prot_9063	PF07819.8	PGAP1	6.9e-05	17.7	0
Neonectria ditissima CBS 226.31	Prot_4660	PF07819.8	PGAP1	0.00046	15	0
Neonectria ditissima CBS 226.31	Prot_3161	PF07819.8	PGAP1	0.012	10.4	0
Neonectria ditissima CBS 226.31	Prot_13186	PF07819.8	PGAP1	0.007	11.2	0
Neonectria ditissima CBS 226.31	Prot_3372	PF09587.5	PGA_cap	0.003	12.1	0
Neonectria ditissima CBS 226.31	Prot_5431	PF05371.7	Phage_Coat_Gp8	0.0071	11.2	0.1
Neonectria ditissima CBS 226.31	Prot_4306	PF05798.6	Phage_FRD3	0.0062	12.1	0
Neonectria ditissima CBS 226.31	Prot_1955	PF10746.4	Phage_holin_2_2	0.0069	11.4	0
Neonectria ditissima CBS 226.31	Prot_13343	PF12834.2	Phage_int_SAM_2	0.0074	11.9	0
Neonectria ditissima CBS 226.31	Prot_8686	PF00959.14	Phage_lysozyme	3.7e-15	51.4	0
Neonectria ditissima CBS 226.31	Prot_6176	PF05489.7	Phage_tail_X	0.018	9.8	0
Neonectria ditissima CBS 226.31	Prot_9830	PF10142.4	PhoPQ_related	0.014	9	0
Neonectria ditissima CBS 226.31	Prot_1796	PF01663.17	Phosphodiest	2e-07	25.8	0.1
Neonectria ditissima CBS 226.31	Prot_5261	PF11131.3	PhrC_PhrF	0.36	5.7	1
Neonectria ditissima CBS 226.31	Prot_1735	PF00114.14	Pilin	0.2	7.6	1.3
Neonectria ditissima CBS 226.31	Prot_10057	PF00399.14	PIR	0.00017	16.1	0.2
Neonectria ditissima CBS 226.31	Prot_7355	PF02678.11	Pirin	2.8e-32	106	0
Neonectria ditissima CBS 226.31	Prot_7355	PF05726.8	Pirin_C	3.9e-25	83.2	0
Neonectria ditissima CBS 226.31	Prot_11909	PF00069.20	Pkinase	1.2e-24	82.1	0
Neonectria ditissima CBS 226.31	Prot_11909	PF07714.12	Pkinase_Tyr	1.4e-07	26	0
Neonectria ditissima CBS 226.31	Prot_9797	PF01735.13	PLA2_B	1.2e-188	622.5	0.8
Neonectria ditissima CBS 226.31	Prot_8219	PF01735.13	PLA2_B	2.9e-160	528.8	0
Neonectria ditissima CBS 226.31	Prot_5061	PF05795.6	Plasmodium_Vir	0.0014	13	0.9
Neonectria ditissima CBS 226.31	Prot_12734	PF05795.6	Plasmodium_Vir	0.02	9.2	5.9
Neonectria ditissima CBS 226.31	Prot_5087	PF05795.6	Plasmodium_Vir	12	0.1	10.8
Neonectria ditissima CBS 226.31	Prot_4964	PF05795.6	Plasmodium_Vir	6.9	0.9	10.5
Neonectria ditissima CBS 226.31	Prot_4297	PF05539.6	Pneumo_att_G	0.35	5.3	37.5
Neonectria ditissima CBS 226.31	Prot_4684	PF05808.6	Podoplanin	4.3e-06	21.6	0.3
Neonectria ditissima CBS 226.31	Prot_6847	PF05808.6	Podoplanin	5e-05	18.1	0.8
Neonectria ditissima CBS 226.31	Prot_5087	PF05808.6	Podoplanin	58	-1.6	26.9
Neonectria ditissima CBS 226.31	Prot_6433	PF10604.4	Polyketide_cyc2	0.0002	16.8	0.3
Neonectria ditissima CBS 226.31	Prot_4043	PF01522.16	Polysacc_deac_1	1.3e-26	87.8	0
Neonectria ditissima CBS 226.31	Prot_6537	PF01522.16	Polysacc_deac_1	6.4e-17	56.6	0
Neonectria ditissima CBS 226.31	Prot_6986	PF14099.1	Polysacc_lyase	2.3e-10	35.7	3.4
Neonectria ditissima CBS 226.31	Prot_12734	PF08418.5	Pol_alpha_B_N	0.081	7.6	11.6
Neonectria ditissima CBS 226.31	Prot_6470	PF08418.5	Pol_alpha_B_N	0.22	6.2	10.6
Neonectria ditissima CBS 226.31	Prot_12437	PF09604.5	Potass_KdpF	0.54	5.5	7.4
Neonectria ditissima CBS 226.31	Prot_7377	PF06184.6	Potex_coat	0.098	7.2	0
Neonectria ditissima CBS 226.31	Prot_9373	PF01011.16	PQQ	0.037	8.9	0
Neonectria ditissima CBS 226.31	Prot_9373	PF13360.1	PQQ_2	2.3e-17	58.5	3.2
Neonectria ditissima CBS 226.31	Prot_10519	PF01080.12	Presenilin	2.6	1.9	8.1
Neonectria ditissima CBS 226.31	Prot_11332	PF01080.12	Presenilin	2.4	2	8.7
Neonectria ditissima CBS 226.31	Prot_4339	PF02244.11	Propep_M14	0.0021	12.9	0
Neonectria ditissima CBS 226.31	Prot_11701	PF12789.2	PTR	0.011	10.8	0
Neonectria ditissima CBS 226.31	Prot_8330	PF00070.22	Pyr_redox	7.8e-06	21.5	0.3
Neonectria ditissima CBS 226.31	Prot_2714	PF00070.22	Pyr_redox	9e-05	18.1	0.5
Neonectria ditissima CBS 226.31	Prot_1147	PF00070.22	Pyr_redox	0.00011	17.8	0
Neonectria ditissima CBS 226.31	Prot_3240	PF00070.22	Pyr_redox	0.00017	17.2	1.6
Neonectria ditissima CBS 226.31	Prot_6333	PF00070.22	Pyr_redox	0.00018	17.1	0.1
Neonectria ditissima CBS 226.31	Prot_1280	PF00070.22	Pyr_redox	0.00084	15	0.5
Neonectria ditissima CBS 226.31	Prot_2368	PF00070.22	Pyr_redox	0.011	11.4	0.1
Neonectria ditissima CBS 226.31	Prot_3442	PF00070.22	Pyr_redox	0.007	12	0
Neonectria ditissima CBS 226.31	Prot_2714	PF07992.9	Pyr_redox_2	5.6e-08	28.1	0.4
Neonectria ditissima CBS 226.31	Prot_1280	PF07992.9	Pyr_redox_2	5.4e-07	24.9	0.1
Neonectria ditissima CBS 226.31	Prot_6333	PF07992.9	Pyr_redox_2	8.8e-06	20.9	0.1
Neonectria ditissima CBS 226.31	Prot_2368	PF07992.9	Pyr_redox_2	4.7e-05	18.6	0
Neonectria ditissima CBS 226.31	Prot_1147	PF07992.9	Pyr_redox_2	6e-06	21.5	0
Neonectria ditissima CBS 226.31	Prot_8330	PF07992.9	Pyr_redox_2	7.3e-06	21.2	0.1
Neonectria ditissima CBS 226.31	Prot_3442	PF07992.9	Pyr_redox_2	0.0001	17.5	0
Neonectria ditissima CBS 226.31	Prot_4822	PF07992.9	Pyr_redox_2	0.00024	16.3	0
Neonectria ditissima CBS 226.31	Prot_9830	PF07992.9	Pyr_redox_2	0.0008	14.5	0
Neonectria ditissima CBS 226.31	Prot_142	PF07992.9	Pyr_redox_2	0.0059	11.7	0.1
Neonectria ditissima CBS 226.31	Prot_6403	PF07992.9	Pyr_redox_2	0.0023	13	0
Neonectria ditissima CBS 226.31	Prot_6931	PF07992.9	Pyr_redox_2	0.0066	11.5	0
Neonectria ditissima CBS 226.31	Prot_2714	PF13738.1	Pyr_redox_3	1.8e-07	26.6	0.1
Neonectria ditissima CBS 226.31	Prot_6333	PF13738.1	Pyr_redox_3	2.5e-05	19.6	0
Neonectria ditissima CBS 226.31	Prot_2368	PF13738.1	Pyr_redox_3	0.005	12.1	0
Neonectria ditissima CBS 226.31	Prot_4822	PF13738.1	Pyr_redox_3	1.2e-05	20.6	0
Neonectria ditissima CBS 226.31	Prot_8330	PF13738.1	Pyr_redox_3	0.00027	16.3	0
Neonectria ditissima CBS 226.31	Prot_1280	PF13738.1	Pyr_redox_3	0.0031	12.8	0.1
Neonectria ditissima CBS 226.31	Prot_6403	PF13738.1	Pyr_redox_3	0.0016	13.7	0.1
Neonectria ditissima CBS 226.31	Prot_3442	PF13738.1	Pyr_redox_3	0.00045	15.5	0
Neonectria ditissima CBS 226.31	Prot_142	PF13738.1	Pyr_redox_3	0.0099	11.1	0.1
Neonectria ditissima CBS 226.31	Prot_1147	PF13738.1	Pyr_redox_3	0.052	8.8	0.1
Neonectria ditissima CBS 226.31	Prot_9830	PF13738.1	Pyr_redox_3	0.43	5.8	0
Neonectria ditissima CBS 226.31	Prot_1453	PF14930.1	Qn_am_d_aII	0.011	10.9	0.1
Neonectria ditissima CBS 226.31	Prot_3223	PF05691.7	Raffinose_syn	2.4e-06	20.6	0.1
Neonectria ditissima CBS 226.31	Prot_4684	PF07218.6	RAP1	0.15	5.3	5.8
Neonectria ditissima CBS 226.31	Prot_12734	PF07218.6	RAP1	0.82	2.8	9.2
Neonectria ditissima CBS 226.31	Prot_8714	PF12768.2	Rax2	8.2e-05	17.1	0
Neonectria ditissima CBS 226.31	Prot_11536	PF12768.2	Rax2	0.0084	10.5	0
Neonectria ditissima CBS 226.31	Prot_8714	PF01030.19	Recep_L_domain	0.00016	16.9	0
Neonectria ditissima CBS 226.31	Prot_133	PF01030.19	Recep_L_domain	0.0016	13.7	0.1
Neonectria ditissima CBS 226.31	Prot_4250	PF01030.19	Recep_L_domain	0.0009	14.5	0
Neonectria ditissima CBS 226.31	Prot_4297	PF07964.6	Red1	4	0.6	28.3
Neonectria ditissima CBS 226.31	Prot_11561	PF08534.5	Redoxin	0.00051	14.8	0
Neonectria ditissima CBS 226.31	Prot_8826	PF13574.1	Reprolysin_2	7e-06	21.4	0
Neonectria ditissima CBS 226.31	Prot_2379	PF13574.1	Reprolysin_2	1.1e-05	20.8	0
Neonectria ditissima CBS 226.31	Prot_2379	PF13582.1	Reprolysin_3	4.3e-06	22.5	0
Neonectria ditissima CBS 226.31	Prot_8826	PF13582.1	Reprolysin_3	1.6e-05	20.7	0
Neonectria ditissima CBS 226.31	Prot_8826	PF13583.1	Reprolysin_4	2.1e-06	22.6	0
Neonectria ditissima CBS 226.31	Prot_2379	PF13583.1	Reprolysin_4	0.00013	16.8	0.1
Neonectria ditissima CBS 226.31	Prot_8826	PF13688.1	Reprolysin_5	3.3e-08	28.9	0
Neonectria ditissima CBS 226.31	Prot_2379	PF13688.1	Reprolysin_5	7.1e-06	21.3	0
Neonectria ditissima CBS 226.31	Prot_9067	PF09284.5	RhgB_N	2.9e-98	323.3	10.4
Neonectria ditissima CBS 226.31	Prot_1035	PF09284.5	RhgB_N	1.2e-86	285.4	13.5
Neonectria ditissima CBS 226.31	Prot_1735	PF09284.5	RhgB_N	8.9e-73	239.9	4.4
Neonectria ditissima CBS 226.31	Prot_1424	PF00545.15	Ribonuclease	1.1e-20	68.7	0.1
Neonectria ditissima CBS 226.31	Prot_6479	PF00445.13	Ribonuclease_T2	2e-47	156.4	1.7
Neonectria ditissima CBS 226.31	Prot_3990	PF00268.16	Ribonuc_red_sm	0.0075	10.5	0.1
Neonectria ditissima CBS 226.31	Prot_3204	PF08069.7	Ribosomal_S13_N	0.017	10.2	0
Neonectria ditissima CBS 226.31	Prot_6471	PF02267.12	Rib_hydrolayse	0.038	8.5	0
Neonectria ditissima CBS 226.31	Prot_1735	PF14200.1	RicinB_lectin_2	0.012	11.2	1.4
Neonectria ditissima CBS 226.31	Prot_5087	PF02009.11	RIFIN	0.001	14	3.8
Neonectria ditissima CBS 226.31	Prot_2116	PF02009.11	RIFIN	0.00044	15.1	5.5
Neonectria ditissima CBS 226.31	Prot_3555	PF02009.11	RIFIN	0.063	8.1	8.6
Neonectria ditissima CBS 226.31	Prot_6193	PF02009.11	RIFIN	0.78	4.5	8.9
Neonectria ditissima CBS 226.31	Prot_1578	PF02009.11	RIFIN	2.7	2.7	12.2
Neonectria ditissima CBS 226.31	Prot_11909	PF01163.17	RIO1	0.0079	10.7	0
Neonectria ditissima CBS 226.31	Prot_11698	PF00074.15	RnaseA	0.79	5.3	0.6
Neonectria ditissima CBS 226.31	Prot_2070	PF11800.3	RP-C_C	0.027	9.4	8.3
Neonectria ditissima CBS 226.31	Prot_4297	PF06459.7	RR_TM4-6	1.9	3.5	18.2
Neonectria ditissima CBS 226.31	Prot_2811	PF06361.6	RTBV_P12	0.0036	12.8	0.1
Neonectria ditissima CBS 226.31	Prot_11332	PF08595.6	RXT2_N	0.28	6.2	4.5
Neonectria ditissima CBS 226.31	Prot_6083	PF02037.22	SAP	0.0072	11.1	0
Neonectria ditissima CBS 226.31	Prot_13224	PF04499.10	SASP	9.9	-0.2	12.1
Neonectria ditissima CBS 226.31	Prot_941	PF01547.20	SBP_bac_1	0.00012	17.1	0
Neonectria ditissima CBS 226.31	Prot_941	PF13531.1	SBP_bac_11	0.0012	13.7	0.2
Neonectria ditissima CBS 226.31	Prot_941	PF13416.1	SBP_bac_8	0.02	9.8	0.1
Neonectria ditissima CBS 226.31	Prot_8493	PF08238.7	Sel1	4.2e-07	25.7	0.1
Neonectria ditissima CBS 226.31	Prot_7908	PF04360.7	Serglycin	0.21	6.5	21.9
Neonectria ditissima CBS 226.31	Prot_8914	PF04360.7	Serglycin	1	4.3	7.8
Neonectria ditissima CBS 226.31	Prot_953	PF08450.7	SGL	4.2e-25	83.7	0.4
Neonectria ditissima CBS 226.31	Prot_169	PF08450.7	SGL	9.5e-07	23.6	0
Neonectria ditissima CBS 226.31	Prot_1130	PF08450.7	SGL	0.004	11.8	0
Neonectria ditissima CBS 226.31	Prot_1574	PF08450.7	SGL	0.00043	14.9	0
Neonectria ditissima CBS 226.31	Prot_6019	PF04546.8	Sigma70_ner	0.022	9.6	4
Neonectria ditissima CBS 226.31	Prot_1578	PF09052.5	SipA	6.3	0.2	21
Neonectria ditissima CBS 226.31	Prot_5087	PF08693.5	SKG6	7.8e-06	20.4	0.2
Neonectria ditissima CBS 226.31	Prot_8714	PF08693.5	SKG6	0.00016	16.2	2.2
Neonectria ditissima CBS 226.31	Prot_12513	PF08693.5	SKG6	0.0071	10.9	3
Neonectria ditissima CBS 226.31	Prot_6072	PF08693.5	SKG6	0.012	10.2	1.4
Neonectria ditissima CBS 226.31	Prot_4684	PF08693.5	SKG6	0.012	10.2	1.7
Neonectria ditissima CBS 226.31	Prot_11291	PF03935.10	SKN1	2.3e-06	21.2	0
Neonectria ditissima CBS 226.31	Prot_2223	PF03935.10	SKN1	3.7e-06	20.5	0
Neonectria ditissima CBS 226.31	Prot_9873	PF03935.10	SKN1	0.00034	14.1	0.9
Neonectria ditissima CBS 226.31	Prot_3147	PF08639.5	SLD3	1.3	2.7	22.6
Neonectria ditissima CBS 226.31	Prot_6083	PF09494.5	Slx4	0.066	8.2	0
Neonectria ditissima CBS 226.31	Prot_8183	PF00080.15	Sod_Cu	1.7e-15	52.7	0
Neonectria ditissima CBS 226.31	Prot_5061	PF10428.4	SOG2	0.064	7.1	13.1
Neonectria ditissima CBS 226.31	Prot_3967	PF04573.7	SPC22	1.7e-25	84.5	0
Neonectria ditissima CBS 226.31	Prot_5431	PF12138.3	Spherulin4	3.6e-36	120.1	0.6
Neonectria ditissima CBS 226.31	Prot_4505	PF12685.2	SpoIIIAH	0.0021	12.8	7.9
Neonectria ditissima CBS 226.31	Prot_9844	PF05642.6	Sporozoite_P67	0.019	8	4.7
Neonectria ditissima CBS 226.31	Prot_13093	PF05642.6	Sporozoite_P67	0.076	6	8.6
Neonectria ditissima CBS 226.31	Prot_11234	PF00622.23	SPRY	5.1e-20	67.1	0
Neonectria ditissima CBS 226.31	Prot_8365	PF04888.7	SseC	0.00063	14.3	0.9
Neonectria ditissima CBS 226.31	Prot_2545	PF02865.12	STAT_int	0.013	10.7	0
Neonectria ditissima CBS 226.31	Prot_11974	PF09598.5	Stm1_N	2.4	4.2	1.4
Neonectria ditissima CBS 226.31	Prot_13102	PF04270.8	Strep_his_triad	0.067	8.2	0.2
Neonectria ditissima CBS 226.31	Prot_953	PF03088.11	Str_synth	1.7e-05	20	0.1
Neonectria ditissima CBS 226.31	Prot_4180	PF13607.1	Succ_CoA_lig	0.0011	13.8	0.1
Neonectria ditissima CBS 226.31	Prot_6543	PF00884.18	Sulfatase	5.9e-61	201.5	0.3
Neonectria ditissima CBS 226.31	Prot_1796	PF00884.18	Sulfatase	4.4e-07	24.5	0.5
Neonectria ditissima CBS 226.31	Prot_7857	PF01975.12	SurE	2.9e-42	139.4	0
Neonectria ditissima CBS 226.31	Prot_4755	PF15290.1	Syntaphilin	4.2	1.9	14.1
Neonectria ditissima CBS 226.31	Prot_6813	PF09305.5	TACI-CRD2	0.011	10.8	0.5
Neonectria ditissima CBS 226.31	Prot_11434	PF05596.6	Taeniidae_ag	0.59	5.3	0.1
Neonectria ditissima CBS 226.31	Prot_12167	PF07519.6	Tannase	2e-146	483.6	3.1
Neonectria ditissima CBS 226.31	Prot_7751	PF07519.6	Tannase	8.4e-116	382.6	0.6
Neonectria ditissima CBS 226.31	Prot_11511	PF07519.6	Tannase	2e-113	374.8	0.1
Neonectria ditissima CBS 226.31	Prot_11915	PF07519.6	Tannase	5.4e-105	347	0
Neonectria ditissima CBS 226.31	Prot_4012	PF07519.6	Tannase	1.1e-98	326.1	3.3
Neonectria ditissima CBS 226.31	Prot_6345	PF07519.6	Tannase	2.2e-91	302.1	1.8
Neonectria ditissima CBS 226.31	Prot_3281	PF14541.1	TAXi_C	8.1e-06	20.7	0.3
Neonectria ditissima CBS 226.31	Prot_6931	PF14541.1	TAXi_C	5e-08	27.9	0
Neonectria ditissima CBS 226.31	Prot_978	PF14541.1	TAXi_C	0.0027	12.5	0
Neonectria ditissima CBS 226.31	Prot_10519	PF14541.1	TAXi_C	0.00029	15.6	0
Neonectria ditissima CBS 226.31	Prot_10519	PF14543.1	TAXi_N	1.8e-10	36.2	0.2
Neonectria ditissima CBS 226.31	Prot_10478	PF12919.2	TcdA_TcdB	0.00077	13.2	0
Neonectria ditissima CBS 226.31	Prot_9270	PF12919.2	TcdA_TcdB	0.0045	10.7	0
Neonectria ditissima CBS 226.31	Prot_1721	PF12256.3	TcdB_toxin_midN	0.004	11.8	0.1
Neonectria ditissima CBS 226.31	Prot_1388	PF12256.3	TcdB_toxin_midN	0.028	9.1	0
Neonectria ditissima CBS 226.31	Prot_5087	PF03153.8	TFIIA	0.0046	12.1	10.6
Neonectria ditissima CBS 226.31	Prot_3147	PF03153.8	TFIIA	0.32	6	22.3
Neonectria ditissima CBS 226.31	Prot_5061	PF05793.7	TFIIF_alpha	0.52	3.8	12.8
Neonectria ditissima CBS 226.31	Prot_2093	PF05793.7	TFIIF_alpha	7.7	-0.1	19.2
Neonectria ditissima CBS 226.31	Prot_4297	PF05793.7	TFIIF_alpha	11	-0.7	32.9
Neonectria ditissima CBS 226.31	Prot_2714	PF01946.12	Thi4	6.4e-07	23.9	0.8
Neonectria ditissima CBS 226.31	Prot_8330	PF01946.12	Thi4	6.6e-06	20.6	0.1
Neonectria ditissima CBS 226.31	Prot_1280	PF01946.12	Thi4	7.5e-06	20.4	0.2
Neonectria ditissima CBS 226.31	Prot_6333	PF01946.12	Thi4	3.8e-05	18.1	0.3
Neonectria ditissima CBS 226.31	Prot_6403	PF01946.12	Thi4	0.00014	16.2	0.1
Neonectria ditissima CBS 226.31	Prot_2368	PF01946.12	Thi4	0.0004	14.7	0.1
Neonectria ditissima CBS 226.31	Prot_1147	PF01946.12	Thi4	0.00049	14.5	0.2
Neonectria ditissima CBS 226.31	Prot_6931	PF01946.12	Thi4	0.0043	11.3	0.1
Neonectria ditissima CBS 226.31	Prot_3240	PF01946.12	Thi4	0.0067	10.7	0.1
Neonectria ditissima CBS 226.31	Prot_3442	PF01946.12	Thi4	0.0093	10.3	0
Neonectria ditissima CBS 226.31	Prot_9830	PF00899.16	ThiF	0.0036	12.4	0
Neonectria ditissima CBS 226.31	Prot_3442	PF00899.16	ThiF	0.0041	12.2	0
Neonectria ditissima CBS 226.31	Prot_1127	PF05690.9	ThiG	0.092	7	0
Neonectria ditissima CBS 226.31	Prot_8968	PF00975.15	Thioesterase	6.4e-05	18.5	0
Neonectria ditissima CBS 226.31	Prot_13186	PF00975.15	Thioesterase	0.0025	13.3	0.2
Neonectria ditissima CBS 226.31	Prot_11561	PF00085.15	Thioredoxin	7.1e-31	101.2	0
Neonectria ditissima CBS 226.31	Prot_11561	PF13098.1	Thioredoxin_2	6.5e-11	37.7	0
Neonectria ditissima CBS 226.31	Prot_11561	PF13192.1	Thioredoxin_3	0.0057	11.7	0
Neonectria ditissima CBS 226.31	Prot_11561	PF13462.1	Thioredoxin_4	0.017	10.4	0.1
Neonectria ditissima CBS 226.31	Prot_11561	PF13848.1	Thioredoxin_6	0.00021	16.3	0
Neonectria ditissima CBS 226.31	Prot_11561	PF13899.1	Thioredoxin_7	6.4e-07	24.6	0
Neonectria ditissima CBS 226.31	Prot_11561	PF13905.1	Thioredoxin_8	3.8e-07	25.4	0
Neonectria ditissima CBS 226.31	Prot_11561	PF14595.1	Thioredoxin_9	0.041	8.7	0
Neonectria ditissima CBS 226.31	Prot_6537	PF06283.6	ThuA	0.017	10.1	0
Neonectria ditissima CBS 226.31	Prot_6193	PF11711.3	Tim54	0.16	5.7	4.7
Neonectria ditissima CBS 226.31	Prot_4297	PF11711.3	Tim54	6.8	0.3	20.3
Neonectria ditissima CBS 226.31	Prot_5087	PF15102.1	TMEM154	520	-6.8	23.5
Neonectria ditissima CBS 226.31	Prot_4684	PF15345.1	TMEM51	0.0039	12.1	0.9
Neonectria ditissima CBS 226.31	Prot_5087	PF15345.1	TMEM51	0.0031	12.4	0.1
Neonectria ditissima CBS 226.31	Prot_11543	PF15345.1	TMEM51	0.005	11.7	0
Neonectria ditissima CBS 226.31	Prot_11332	PF10267.4	Tmemb_cc2	0.27	4.9	6.5
Neonectria ditissima CBS 226.31	Prot_9480	PF12884.2	TORC_N	0.0091	11.8	0.3
Neonectria ditissima CBS 226.31	Prot_4179	PF00451.14	Toxin_2	0.22	6.9	0.6
Neonectria ditissima CBS 226.31	Prot_5191	PF05980.7	Toxin_7	0.012	10.9	1
Neonectria ditissima CBS 226.31	Prot_8213	PF05980.7	Toxin_7	0.12	7.7	9.2
Neonectria ditissima CBS 226.31	Prot_8493	PF13414.1	TPR_11	2.8e-05	19	0.1
Neonectria ditissima CBS 226.31	Prot_8493	PF13432.1	TPR_16	0.8	5.8	0.3
Neonectria ditissima CBS 226.31	Prot_8493	PF13431.1	TPR_17	0.36	6.6	0
Neonectria ditissima CBS 226.31	Prot_8493	PF07719.12	TPR_2	0.59	5.6	0.2
Neonectria ditissima CBS 226.31	Prot_8493	PF13174.1	TPR_6	0.48	6.4	0.1
Neonectria ditissima CBS 226.31	Prot_8493	PF13176.1	TPR_7	0.4	6	0
Neonectria ditissima CBS 226.31	Prot_12349	PF02343.11	TRA-1_regulated	0.26	6	1.2
Neonectria ditissima CBS 226.31	Prot_367	PF13729.1	TraF_2	0.0035	11.3	0.1
Neonectria ditissima CBS 226.31	Prot_4505	PF03896.11	TRAP_alpha	0.0038	11.4	2.9
Neonectria ditissima CBS 226.31	Prot_3223	PF04956.8	TrbC	0.0096	11.2	0
Neonectria ditissima CBS 226.31	Prot_10115	PF01204.13	Trehalase	1.2e-122	405.4	7.8
Neonectria ditissima CBS 226.31	Prot_1280	PF02254.13	TrkA_N	0.026	9.8	0.1
Neonectria ditissima CBS 226.31	Prot_3442	PF02254.13	TrkA_N	0.0083	11.4	0
Neonectria ditissima CBS 226.31	Prot_6931	PF04820.9	Trp_halogenase	0.001	12.9	0.1
Neonectria ditissima CBS 226.31	Prot_1280	PF04820.9	Trp_halogenase	0.00063	13.6	0.3
Neonectria ditissima CBS 226.31	Prot_2714	PF04820.9	Trp_halogenase	0.0012	12.8	2.3
Neonectria ditissima CBS 226.31	Prot_2368	PF04820.9	Trp_halogenase	0.0016	12.3	0.1
Neonectria ditissima CBS 226.31	Prot_6333	PF04820.9	Trp_halogenase	0.0023	11.8	0.1
Neonectria ditissima CBS 226.31	Prot_8330	PF04820.9	Trp_halogenase	0.0025	11.6	0.2
Neonectria ditissima CBS 226.31	Prot_142	PF04820.9	Trp_halogenase	0.008	10	0.7
Neonectria ditissima CBS 226.31	Prot_7674	PF14558.1	TRP_N	0.00069	14.9	0.1
Neonectria ditissima CBS 226.31	Prot_13102	PF05887.6	Trypan_PARP	0.14	7.2	10.9
Neonectria ditissima CBS 226.31	Prot_5766	PF00089.21	Trypsin	1.5e-63	209.5	4.4
Neonectria ditissima CBS 226.31	Prot_5766	PF13365.1	Trypsin_2	0.00089	14.5	2.2
Neonectria ditissima CBS 226.31	Prot_5299	PF00264.15	Tyrosinase	3.4e-50	166.5	3.1
Neonectria ditissima CBS 226.31	Prot_9958	PF00264.15	Tyrosinase	8.3e-50	165.2	0
Neonectria ditissima CBS 226.31	Prot_282	PF00264.15	Tyrosinase	6.8e-37	123	0.8
Neonectria ditissima CBS 226.31	Prot_3039	PF00264.15	Tyrosinase	1.4e-36	121.9	1.8
Neonectria ditissima CBS 226.31	Prot_2545	PF00627.26	UBA	0.14	7.4	0
Neonectria ditissima CBS 226.31	Prot_11038	PF01209.13	Ubie_methyltran	2.5e-05	18.7	0
Neonectria ditissima CBS 226.31	Prot_9153	PF04615.8	Utp14	0.74	3	25.6
Neonectria ditissima CBS 226.31	Prot_9852	PF04615.8	Utp14	7.8	-0.3	19.6
Neonectria ditissima CBS 226.31	Prot_3269	PF02830.13	V4R	0.0075	11.4	0
Neonectria ditissima CBS 226.31	Prot_8968	PF01991.13	vATP-synt_E	0.0085	10.6	0
Neonectria ditissima CBS 226.31	Prot_1721	PF13517.1	VCBS	5.4e-11	38	2
Neonectria ditissima CBS 226.31	Prot_1388	PF13517.1	VCBS	2e-12	42.6	2.8
Neonectria ditissima CBS 226.31	Prot_6357	PF13517.1	VCBS	1.2e-05	20.8	6
Neonectria ditissima CBS 226.31	Prot_7356	PF07545.9	Vg_Tdu	0.31	5.8	0.4
Neonectria ditissima CBS 226.31	Prot_11019	PF06057.6	VirJ	1.9e-05	19.7	0
Neonectria ditissima CBS 226.31	Prot_8968	PF06057.6	VirJ	0.0045	12	0
Neonectria ditissima CBS 226.31	Prot_8213	PF06057.6	VirJ	0.01	10.8	0
Neonectria ditissima CBS 226.31	Prot_4660	PF06057.6	VirJ	0.0074	11.3	0
Neonectria ditissima CBS 226.31	Prot_10818	PF13310.1	Virulence_RhuM	1.5e-05	19.3	0.2
Neonectria ditissima CBS 226.31	Prot_10097	PF03302.8	VSP	0.016	9	1.5
Neonectria ditissima CBS 226.31	Prot_9897	PF01822.14	WSC	2.7e-20	67.4	2.5
Neonectria ditissima CBS 226.31	Prot_832	PF01822.14	WSC	1.1e-17	59	3
Neonectria ditissima CBS 226.31	Prot_12675	PF01822.14	WSC	3.3e-13	44.7	7.1
Neonectria ditissima CBS 226.31	Prot_9016	PF01822.14	WSC	4.7e-08	28.1	0.5
Neonectria ditissima CBS 226.31	Prot_12562	PF05658.9	YadA_head	0.045	9.3	1.5
Neonectria ditissima CBS 226.31	Prot_4297	PF05758.7	Ycf1	1.4	1.7	13
Neonectria ditissima CBS 226.31	Prot_13186	PF03853.10	YjeF_N	0.0012	13.7	0.2
Neonectria ditissima CBS 226.31	Prot_3993	PF13996.1	YobH	0.061	8.5	0
Neonectria ditissima CBS 226.31	Prot_10478	PF14179.1	YppG	0.093	8.6	8.8
Neonectria ditissima CBS 226.31	Prot_6083	PF12732.2	YtxH	0.75	5.5	0.2
Neonectria ditissima CBS 226.31	Prot_3450	PF14369.1	zinc_ribbon_9	0.0019	13.5	0.1
Neonectria ditissima CBS 226.31	Prot_9268	PF13866.1	zf-SAP30	0.027	9.4	1.2
Neonectria ditissima CBS 226.31	Prot_6675	PF00172.13	Zn_clus	1.5e-10	36.1	9.5

## Sheet: CBS226.31 Peptidases
Predicted peptidases CBS 226.31
Prot_10254	PF00326.16	Peptidase_S9
Prot_10378	PF00326.16	Peptidase_S9
Prot_10404	PF00450.17	Peptidase_S10
Prot_10579	PF02129.13	Peptidase_S15
Prot_10579	PF00326.16	Peptidase_S9
Prot_1127	PF01244.16	Peptidase_M19
Prot_11680	PF00326.16	Peptidase_S9
Prot_11742	PF00326.16	Peptidase_S9
Prot_11850	PF02129.13	Peptidase_S15
Prot_12650	PF00082.17	Peptidase_S8
Prot_1274	PF00450.17	Peptidase_S10
Prot_1276	PF05577.7	Peptidase_S28
Prot_1387	PF02129.13	Peptidase_S15
Prot_1387	PF00326.16	Peptidase_S9
Prot_1538	PF00450.17	Peptidase_S10
Prot_1635	PF00326.16	Peptidase_S9
Prot_1637	PF04389.12	Peptidase_M28
Prot_2116	PF08192.6	Peptidase_S64
Prot_2303	PF00326.16	Peptidase_S9
Prot_2373	PF00082.17	Peptidase_S8
Prot_2379	PF00413.19	Peptidase_M10
Prot_2379	PF05572.8	Peptidase_M43
Prot_2379	PF12388.3	Peptidase_M57
Prot_2379	PF10462.4	Peptidase_M66
Prot_2414	PF00326.16	Peptidase_S9
Prot_249	PF13485.1	Peptidase_MA_2
Prot_2545	PF05577.7	Peptidase_S28
Prot_3100	PF00082.17	Peptidase_S8
Prot_3153	PF00450.17	Peptidase_S10
Prot_3161	PF00326.16	Peptidase_S9
Prot_4082	PF00326.16	Peptidase_S9
Prot_4339	PF00246.19	Peptidase_M14
Prot_4391	PF03572.13	Peptidase_S41
Prot_4832	PF00082.17	Peptidase_S8
Prot_5261	PF00082.17	Peptidase_S8
Prot_5313	PF01546.23	Peptidase_M20
Prot_5313	PF04389.12	Peptidase_M28
Prot_5692	PF01546.23	Peptidase_M20
Prot_5908	PF13485.1	Peptidase_MA_2
Prot_5951	PF05577.7	Peptidase_S28
Prot_5951	PF00326.16	Peptidase_S9
Prot_6232	PF00246.19	Peptidase_M14
Prot_6345	PF00326.16	Peptidase_S9
Prot_6433	PF00326.16	Peptidase_S9
Prot_680	PF00246.19	Peptidase_M14
Prot_7083	PF00082.17	Peptidase_S8
Prot_7416	PF13485.1	Peptidase_MA_2
Prot_8826	PF00413.19	Peptidase_M10
Prot_8826	PF05572.8	Peptidase_M43
Prot_9016	PF01457.11	Peptidase_M8
Prot_9063	PF00326.16	Peptidase_S9
Prot_9480	PF01650.13	Peptidase_C13
Prot_3281	PF13650.1	Asp_protease_2
Prot_978	PF13650.1	Asp_protease_2
Prot_10519	PF13650.1	Asp_protease_2
Prot_3281	PF13975.1	gag-asp_proteas

## Sheet: CBS 226.31 Effectors
Predicted secreted effectors CBS 226.31
>g9039.t1 | Effector probability: 0.76
MYFLSAARALLAAAVFQAVAAHNIVLPAHGRECFHETLHKDDTMTVTFQVGDREFGSAGNLDIDFWISNPSGQYETNEKTVSNGDYSFTAKHDGKYTYCFGNENWGANTKEVSFNVHGIVYVSESDVPADPLDREVRRLSELLDQVKDEQQYIIMRERTHRNTAESTNNRVKWWNMFVIGIVIGESLFQVWWLRRFFEVKRVV
>g9358.t1 | Effector probability: 0.791
MVALPSFFTLALCVSAVLGEGCFSNKKDIPFTALKDDPMPAVHAAIDSFCDGMIKDGHIPASFKDWKVCYTAYARSMTLAVNKYLDGGTTPDSERCKAGLKGAALCDYGGIHILDGDHYPWWSFESRGHWEYTADPNDGACDPGLAWGGNIF
>g9374.t1 | Effector probability: 0.905
MHISTALVAVLATFAAAAPKSYGCKPGTYACKSNAKGWQVCNTEGVWVDGGKCPPKTVCKFYPPSLSPYCVPPDFEFP
>g9385.t1 | Effector probability: 0.63
MFFKSISAALLLAASVSAVPTPTNNDSPDGTVSHSRITHSVVAGLGGLRFDPDNVVAEVGDVVEWHFLPMNHSVAQSSFGEPCEPLADDSGFFAGFNFVTPEGQADNVFQITVTDSKPIWYYCPQQKGSHCQKGMVGVINQNFDNQDFSLRRHKELAALTEVSVIPPYEQGGDVIVNPNPNGGF
>g9752.t1 | Effector probability: 0.789
MFASFTALLAAASATMVSAAAIAPRGSGTASMTPHDQYSSSIGVLGCKIRTDRVAYWPGSVGCDDICVKVSHAGRSVYLLRIDQSGGAHDMSYDAWNYLGFGKSATEDPQQGGGINMEYETVHASKCASLLHDGKLPLSASNSMNYVASCIAEPNSWVAKNYRLYNIMDPICKWGVEEHCTLNLAVSNQPDCPSGLGATAKLNLKVSNILYGTGKKVQAL
>g9848.t1 | Effector probability: 0.848
MIPRTILSAFAAFSSLIGIVSAAPVVENTVLGRPEYRMEYSHPNHVWTFYVYSSGYKAKKEPVDYVEVNTATKTLIVRNVNNGFDKTKNRLRMRQILKECWTKTGLKPLDLKYVQGKTIQNFGMQSALDTCRRSMGLGDAGEFQVSSTDVAKGKKDCWARLGKTVFSGAINGAIRDFGPSKKLVQVKVTREWQGDDVLYTFQ
>g10195.t1 | Effector probability: 0.552
MFFSKIVMGLAAFASIASTTAIPESTVETGVTLRDTGSSLFERTSFKCPTDMSYCGWTKACACPPGKSWNSKKSACTGSVITGAWPKPSVSVYGSVDAKLGAFCACSPYKIVKYSAKHSYCQASLKNVVFLAPVEIEAEIAVYAGAAIDVTAGISVSLKNTCGGLAGLYLGSVTDAVALFNTGAYGLSVTADNVVGALVVGLLSSFKSLTCKLGITRCPTYDCVSYCTKGCKNYIDVKGTVGGFLQGLVGFCVLPDVLLFVGSAGSIITVTIEGLLCLVGNILKSVLGIFSCNC
>g10266.t1 | Effector probability: 0.849
MKLQLFMLSLTAMTALAAPVLKGRQNDIPPCEDGGEGPVNDAFDTSAECKEKCFLRENADNDNKYGVCAGACRNVGHPAPIFQCRGKQLLLFSQGARLRSSTGDAT
>g10358.t1 | Effector probability: 0.822
MMIKCGLIVALAGVLTLAVPAPLPVDINLDERIRFGWCRETNTTESCDDRFLDHARCYDFKVLDPYLNDNVETVSVTGGRCVIWEKDNCAGDHTGMIVGSDIAIDNACPGYTWSTRVSSIKCCGGDANALWCANPGRWPKCTD
>g10555.t1 | Effector probability: 0.834
MVSFKPFFLFCSLAAAAVLPRASQDVPAGHCCFTLNDVSTGAVVQENKASGFLYLNGGKPNGWYCINLSNSQNILLDDFNNACFLAPDGLFQCLDPTIGPNSWTLKKSGSNTLLAHDGSTTFTSCPNKNPGQLLYGIKSGDSSQCKKITLKAKGFKGTCKSFSARSLEE
>g10769.t1 | Effector probability: 0.844
MQFFTVPIFMMLAGGALADLHNVAVCISNRKYSQIGGSPFSVSYTFAKDYEILLAETECACNFYRARNTGDKQWDQCPDCTFDGATCNSADWHIGGDEMNYYCTELCHAQGSEAN
>g10774.t1 | Effector probability: 0.854
MKFLATLAHLVATASAVDLYLHTNNNCGDSSLRCNNVNPNTCCGTDASNSPYQSIAVRGVNSGWNLQGRGYDNGRCNRLQTVSGNNGNDWICNRSNGFRYTGAGYNFVGRKRAEPKSKCQRPNALVLADGTEYDLTDLSDDDYDGIVELGLKATSPKDVPEELQAFQIN
>g10896.t1 | Effector probability: 0.628
MKKNDVIAIIIIILFILLAAVSFGIWKLVSVAKKSMSVTSGTTSSTGSSHIHMGVLDTDKDTGPTTRIYVRKMGKAIFGN
>g10914.t1 | Effector probability: 0.644
MHFKILAFVVAALAAAAQAEHSTQNIVSSLSKVSGLVRAATKTADSIGGNSYRGAVPRLVINTRNIIGLLTGEVQNSLAGLGSIGGDNDDEDICEAFNKFTKTQSKFLGTIASKGDVLTGGPAELVIANILHALKGGVDGVAAGVIDGAPTCQTAAANKKALDEALDEALESIS
>g11019.t1 | Effector probability: 0.644
MYLFLTFVALFLALVTGNNETPGHRGMECTPGVHIIVARASLEAPGPGIMGAVAEKIINRMPGSDMVAVDYPALLDPYVPSQTAGVANMTKMVQEYAEECPRTKMVLMGYSQGAHVTADVLCGASEANFPTTKPQCSSITDKIAAVVLMGDPSFTAGQPYNLGTSKGSGIFPRQNPAGCNFVHNKMISICDAGDLFCEAGSDDLAVHMSYVANWGDLAADYVVSMYNSC
>g11102.t1 | Effector probability: 0.887
MLFQVGLLAALVPSTLACLGYEGGVPTATTTHSNSNYIEVKKGEVYDGKWARFDRGSGACGSGEGGQADAVFLLREGATLKNVIIGKNQKEGVHCDGHCTLEYVWFEDVCEDAISIKNDKAGKETWIIGGGAYHADDKIIQHNGCGTVNIINFYAEDYGKVYRSCGNCSSQCKRNVYVEGVTARNGGEVVGINQNYGDTATLKNVCTDAKNPCVMYKGCAGGCEPSKVGYCSG
>g11160.t1 | Effector probability: 0.791
MRYLVVILSLLSLANAQFGGFFDQMFGQQGGGHEHQHQHQQQQQAPSDASHYRHYHEQSSCDKYLCPDTLACVSVPHHCPCAWDAHQEKFELAEGQRICVSRGGFRESEAARKIELARKGLL
>g11436.t1 | Effector probability: 0.806
MKPSARTLLLTTLISGVFSSLCTPAPCTAVHVFLIRGTNEAYPGLQKVAADAICHDWDCSWSNVEYQAVFHDYCDSVEGGIANALTAVTEYAERCPEAKIVLSGFSQGGIQSAWPRNETELKSLNRWSSKLRDYCNLDDPACARGSNWTAHENYFELYHADAAQFVRFKACA
>g11790.t1 | Effector probability: 0.659
MKPSTFLTAALAILPAALAVETKKSVIVWFEDESTPDSAIYDAKQSILDAGGKITHIYTIIKGFSAISPEKALQQVQASGNKYDIHIEEDEVVSTY
>g11809.t1 | Effector probability: 0.697
MQFSSILSIFTLATAASAVTVSFDTGYDQKSRSLTTVSCSDGSNGLMTKHPNWKTQGDIPKFPYIGGVDAIAGWNSPSCGSCWKLEYKGKTINVLAIDHAASGFNIGLAAMNALTHGQAGKLGRVDAKATKVAAKNCGL
>g12309.t1 | Effector probability: 0.843
MADAPIAFLPLGAIIQSFVVNGVNIVQGFPTADDYVKHNTPFFGETIGRWANRIKGARIDSLNGGRAYPLAVNNAPNHLHGGTVGWGKR
>g12374.t1 | Effector probability: 0.809
MLFLGRQFLILGMACLHAALAFQSFSQGCQPMDAQFYSEDAVGFYCFPEDESAVYSYTYSIIELHHCVGNNAGTLIAYDEGNYQESCENCSLESVRENDYRTCFLACTCYGMNKQANESRLDLNHVLRNDNGRLACFGHRGTQDRASPECHNNMECSTGVPRLTPRAEPTWGANTIER
>g12541.t1 | Effector probability: 0.731
MAFHTLSSRVVASSVLAALAAGGTYGFLVHRRISATDANKITIFDTTPDSFQQSLSVSGIVNTRKHQQVEDSRFITLEIPPQHQHITDEVLLARFAKGYFGGLVLTPERILLKTIGLNLTKFTSKAPKLMPCHHGHQS
>g12551.t1 | Effector probability: 0.601
MRLSSLIVTAAALLLGPAQAVPTHQFDEFFPGWNDYLQDIIHNDCKRDYDFYRSGRINASASASSRVTPLINCILVQFPEFRKTEIAASAVILGLLPMILQSLGSTTAETALEDHGQQAEDH
>g12562.t1 | Effector probability: 0.666
MHFSSTLVAALSLAVGANAWAQAGDGTWVANNYVHTFDNGLRVHEACTWMNTQDHHPSGDPCAYWVDGNGNVANGRCYWKDATLREMTCFRFT
>g13018.t1 | Effector probability: 0.59
MHAALLLLSALPSALALHSYSVPMNLRVAEADNDDPCVLPDDYHIVGYSSEAKSDGQTLSAFNFTFKDDTTNITTPCEFNSSSVSVPGNGTPRYLCDNNDIEFLWQDEERRLTMIQKVCPDTNGASAYEVAGGVRLWIKCPESGGACATNTTDYRALFVSLNPVMNPSRV
>g13024.t1 | Effector probability: 0.709
MLRPSPQKLFLLGLGAAIASLLSGANAAAVMVPSTPSDQVPITSPKHASGNIACRYVAQFALDFPCARIYHGDAQRYLTAEAMASSLEDCASACFNGQCSSLTYHDGHCALYSEAALYLKDVRRDGSGPLFDMRCFKCS
>g128.t1 | Effector probability: 0.578
MVKISSLLSGLALSSGVFGYANPKACSGVCNNAHDPSIIRRSDGTYFRFSTGGRVAIHTAPAIEGPWTYKGAMLPSGSVINLPGNQDLWAPDVIQIGSLYYVYYTVSAFGSQNSAIGLARSSSMDVGTWTDVGATGVRSDSSKAYNAIDSNVFKDGSTWRMYFGSWWKGLYTVPMKDTPTAASSSGGSTQLIYEPVTTAIEAPYLYKNGNYYYLFYSQGKCCGFDADRPAAGKEYKIMVCRSTSATGGFVDKNGKACVSGGGSVVLESHGWVYGPGGQGVYNDPTHGPVLYYHYVDTRIGYADGQKKFGWNTISFSSGWPTV
>g898.t1 | Effector probability: 0.598
MLPKNILLSLLLAAVSANALPNPADDVADLESRDDDDLVSRDHHDCGRDAYWRNGNCFCRHSDQQYDSSSRQCHCRGDQYYDNRMNRCTCRGGRRWDSRRNMCRRGSGGD
>g1271.t1 | Effector probability: 0.607
MKFLQALLAAAAVVSQVQAAPQQSRDKKPPYFILTGDSTVAVNGGWGDGFLRDIKAPAAGVNPAKSGATTVSFKANGRWEAVIKGIEDQLGDFSPIVTIQFGHNDQKVMTLDEYKSNLTSLAGDVTNAGGTPIIITSLTRRRFSGGAVIQNLEEWRQAAIEAAKEVGIKWLDLNIASTDYVNAIGSDNATYYDLSEGDKTHLNTAGETVFARMVVDLLLQKRADLKPFFIPNKALSDKIWAGEFATGDE
>g1443.t1 | Effector probability: 0.675
MRFYFGILLSFLVVNVSAGGIRMAYERMFVWFAYQAQIDYLMQTDGDFKALQICPEGLGKGPGGTLTFNEFIQYTNMAPDGTLGPISQVREAATLQVDTTARNLYRHPKWLTSRWMSPNHVIHSANGGYDRMMFEVSKVVGDIKSKGILNTNIRSAIDAIQKVVISREIDYEKHRMPAMKADPDFTGRNQVIWVTDQLVLETEKNAEKIDIVDTQAKNPAQPNIAQRINTWEKKTYFADSTPATGSDGNPTTKGKVASNHKRAVVNSQRCEKKAKTGHC
>g1453.t1 | Effector probability: 0.596
MTRFSLVTAVLALISAVHAQCGSGTPDARVTGSGSSFTSTRGSTTVYTGSDYRAAIQAAVDSIGSGQRVSVIASGSIGANTISISSGKIFEGCGTINVATRSGRGAIESLGTTGVQIPYLTMTGNPYFGLRFYGTRDLVLGRITLNLSGGLGIRFDRDQAANANVKMDVITVTGAGSHAVETWNIDGLTINQVIARDVGESGLLLQKTTNAQVGLVDGNNVGAGTGYATLRMANNNGQNANGNYNTNVYVDKVVSRGGGRGVFCVSQSGGAVITTVDLASNGNNAVLIENCYNLSIRGGTVNGGGEVRVSARTEFPNTKDVWITLRVDGTTVRESPCGDNVNWTLTGNGARTIC
>g1490.t1 | Effector probability: 0.587
MQFTSIFSVATFASMAMAASIQVNFYSDTGCQNYIGSRYIDYNASSGGTYHTGGPSGSRGGLYVNSNGANLAYRGFTNHADGSSPFTGNVVDGECIGTLNGVYAVFTV
>g1492.t1 | Effector probability: 0.884
MHFQQAIATLALATAVSAQTLSIPARVGTIISLPAASTISGSVDLGNHEYDRGRDCDNDDDTGDENAVFILKDGASLSNVIIGARQLEGIHCKGKCTLKNVWFRDVCEDAISALGTGDVLIQGGGAQEAKDKVVQHNGRGTVTIKDFTVVNAGKLYRGCGDCTNNGGPRNVIIQNVKAKGVSNLVGINSNYGDTATISGTCGSSVKKVCQEFKGVEKGSGKSEEVSTTANCKGQSSLSAC
>g1701.t1 | Effector probability: 0.618
MRLSSTTILTVLLAVATSTAQRLGIPSFEFLYTVNATLGERWQVGDYGQGSRVVIPITGGSFAGPRMSGTVNNLGADWGVTDTKGIFFPDTRYNLRTDDGADIYIQTSGPTQPNNQTLLRGVFQTGHPDYEWLNYVVATGVLQRPTGEDKGKYVIIDMWQISQIA
>g2432.t1 | Effector probability: 0.615
MRLPTSALLLLLPAFAQAFTLPSGLADGVYTVDVDEDGTEIHKRLPDDNMIRDVVEGTASLEKRTPTTKQFWCGCAFPLDHTNCDLATADLKNQVTPAKTLKNNYYSIRGNVVAFVCNPYTTWGGYYTDAEYLGLIFSDISSRCGQYIAGTSQNIVNLSYAYVGYMQYSAGLDFCATSTSSKQSSC
>g2508.t1 | Effector probability: 0.687
MHSTIGLKVAAVTALLSQACKVLANPLYLARAAPQPKVRAPTRGSAIEDFANSGTNYHVWAQRMVDEGKMWYPAERSVEIHSPKQKLETVVVRHASGGLSLRQQPPQAPDFLIDAIVCNGLGGGNQNYEEGKQKFCSWAPSVADASTDAAHYVLDNALCDGGVLCDLQLSILLYGGRWFIDDKIGDICTFWWDAIHTRCEGKGGSGKIVYNKNRNELGDSCGKPTCKAGGGGVGTEIGSLWAEFFDHDDGATCPAPGRAQICKIDNFN
>g2660.t1 | Effector probability: 0.877
MFACRTKIASFLVALASVNVLAAPAPAKKVNLDERILFGWCRESNVTQTCGKRRLDHGACYDFDVLDGYLNDNIETVTARGGRCVIWEKNGCSGDHTGMIVGSDIAMNTVCPGYPRSSKASSVKCCGGDSNAMWCADPGFRPKCTD
>g2771.t1 | Effector probability: 0.748
MARFTSTISALTVLVGAALASFHSNTGLLQMVTYVKRHPHFTRDEFWVYWETQHAPKVVPLATHFNISRYQQIQVGGKIPPTEAGVSAPVSNELVDFDGIAMFLYSSPDVLTAMLSHPYYLEVVEPDEHVFIDKEAFGGGMVATYFGNNIEAVDRAKDVWVGDRATRRSYQKLFNSYL
>g3021.t1 | Effector probability: 0.877
MQFITAVISIAALVLGVSASPIKSDPHIADFRLFGEKGCFDENEGVWTVLHSDLNKCTSFNGETVKSVLLTDINKGCKRKLTSGPVAGSLANNSKSGFTVMSTAQVIRRKYTLALSIAEACQYAMKKDVEYKWGPM
>g3206.t1 | Effector probability: 0.7
MKVSSTILMLAALVGSGLAISVKDAGIASGPSGSPNCIRQCLITLGPEDGASSQRSDGFAGSCKEYADRALSGANRAVDGGRLNINGVGGNLVIDFVKNGRDRRASFTNCKNAVYTGGQCVPRQGGCDFQGQSG
>g3280.t1 | Effector probability: 0.656
MFSILRLVSLMALVGFSRADFAVGTSASQGGIGEIVPDTGGDIYSTDPVAVSYPGGCLDNVQQFKCVSERCLIEGFFEIRGLKTEDQYGFNWNGEGWEFSQNSEILGFCTRNDDEGCTKTGVNYSLGFFSHMLCTGSINSGF
>g3308.t1 | Effector probability: 0.828
MQYNVLAIFATMVAMTGAVSIHVCTSKDFTGECTDVTFAKNTCTALPFNDAVSSIRLNNYVCSFYTHKDCTGTSMTLSADNANLREGTWNDQLTSVMC
>g3450.t1 | Effector probability: 0.781
MYSSTILTTLLTAALAIQGIAAGPCRAATPTYTCRALPISRRSKLCNAQRHLQNVSYRLQRQSGLDWEQCAALCAATEGCTMITSDSDDYCNIWSGTREEAGITGTSDPDEYLSEMACFSSLTASKILPAIFHPPPTAIPDQAFFFRLHHHHHKGHPTTNRPQSTTPRPQPPSTSMPREEYQVPTGAAGAQRGATRDTHDTRSVMSYLCGDCGGSVTLGKDALVACPHCAGRVLYKERTKR
>g3967.t1 | Effector probability: 0.673
MYNSLTRIQNTFGFFTTVAFVVAALIAASDLLTPRTPSASLIAPTNVQVVKGRPHYYSSKKEEYAIIKFSLDADLSSLFTWNTKQLFVYVTAQWPCAGNATNEAVIWDSIITNPSADHLQNIGPVAMKKLKRSAEGKTIDPSRGLLKLRNQKPKYQITHPSGKIAEKDNVTLKLHYNVQPWVGLLTWNQDQDIGPWKQLVGGISKTFSLPALKKKDAQKKNKSN
>g3990.t1 | Effector probability: 0.602
MIFPVAFVGLVLTSVANAAPAHVEPVAIDLNSTKWTPEHILKHDEVILYGEDGRMEVVHEAVYQQLVEANGYSIDTPEVDEAFMNKSEKFNHLDSRASCAYTTALITDKTQSFIDWDVQMSPVVIGTGKNGIDVYVSSGYSVANSVTVSGSADLGFVKDRLGVTFGVSFSRTWTTATVVNIKGTVENGWSGVMITKPFKTRRYGRNMRGCIGSMKQTGTFMADSYKEGSYAGVKWVSGAITMCTKKQFPLTRCNGGGTFI
>g3991.t1 | Effector probability: 0.824
MHLTATFSLFLLAAGGALAGLHNAAACVTNRKTSPVGGTGWSVSYTWAKSYEILPDATKCACNYYRNRNTGNKQWDKCPDCTFDGTACNSAGWHIGGDEADFAKVQKPKS
>g4018.t1 | Effector probability: 0.767
MVLVAQLGLVAMGFLPAVMACLGYEGGVPVATSTKTNSKVITVAAGATFDGGWARYDRGSGACADGEGGDADAVFLLGAGATLQNVIIGKNQQEGVHCNGPCTLRFVWFEDVCEDAITIKNDAKGQETWIIGGGAYHASDKIVQHNGCGTVNIINFYAEDYGKVYRSCGNCSSQCQRNVYVEGTTAYDGGEVVGINANYGDTATLKNVCTDADHPCVLYQGCAGGCEPSKVGYCSG
>g4249.t1 | Effector probability: 0.701
MLRFMTYISAAAFAAASLVQADCYGSGESWDGDSFKAVEAAQTLCSDVYYRTFANLEFKTRCVNLSSNKKVDFTITMGSLRLPIDIGQDACNDFLKREILGCEHGGRSTHTFYPIEDNIPDGQPLNVISVDADFISDPSSGQCA
>g4314.t1 | Effector probability: 0.719
MALAKLLGAAALLAAQLSPAAAADVPINTPSPMLQPAYPACEQFHLASVGQDCNALIAFAQITRAEFFRINPAVDGEKGCADKILANTWYCVKAKAAHPAPSATANPGPKPTKDRKAPHGGAEREGDAKTRNKAEKPKPAKTKKKDPKITKAPVPNYNECVYGDCWYAFGSLGKGDADKVASASSLCKKVFAEGCKGDWDWPGKINKLCDGCKELKSACPCFLAGHYHTRTVNHLLYSRKGDQDQNDWLPSDE
>g4494.t1 | Effector probability: 0.697
MAYILYSVSVFFLVIATALFFTRARWIPHVPDLPGAGYIYSRLPDSFAGDIEAGLSSSTFDLSGNLEDGDTRAGLDDAAKAEVLRIMKRRRLTFDKARKVYMEERFKANGIGADGLPRDPKFVSFS
>g4717.t1 | Effector probability: 0.573
MLSSVFPTLASAGLLAGHAAADFGVWRIQENVVGSGVFEYPLLTGGNVQSGGDVYDCWAEHAHWYDLPCDGCGNGDAIHQNGGILYVGESYQDEGYRLKFESIPDGAAKDACSQLLGITCDYRILKNGAEEVGGCEYGGHALSFTENTMGVLAHIDGFRHLWCSSQQVSF
>g4742.t1 | Effector probability: 0.716
MFGFKKPLSHYFAMAGVSLMIAGLATSSPLQHDDLASSGLSARAETNETLPAFLTNTVLDPSFETDMRDVHIIYDYDAEDDEGNPQKWRYELWIFSENRAIYAIHGGPMAGRSNYQTATYQCIRPGELWQINWLEETGTIVSIAYDIPQGKVTTLIGFSKGHWQNPTAAHGDKRNATDFQRWRDLAKIGTQVERFMISEQGTVVDKFRGKGDLVPIAPNATTF
>g4757.t1 | Effector probability: 0.894
MHAGTFVLVAFASLAVAKDCAIFYTWSGTSNLDVWRDLKAVGMCGDIGGSIANSELALPNGQGSTNKCAVCRGARGGTKDYGRTITQGTTQISYNVRCGYYAKNQCHA
>g5115.t1 | Effector probability: 0.554
MKSFSLCLSLTAVAALCASVAADAEPARILTFFTKKAGLTEDDFHHHWTNVHGPLVVPWALKYGVNRYTQYHTTESNRSSLQKALQLPDDYLLNYDGAADFTVSSLAEFLSAYADPYYKQVIAPDEESLFLHSGDVMVIRGTMGWTSEVVKDGVSAVDATSGCAKWKEIHGSAGEGCA
>g5223.t1 | Effector probability: 0.819
MQLSNLLSIFTLATAASAISVSYDTGYDDPNRSLTVVSCSDGSNGLMTKHPTWKKQSDIPRFPYIGGAQAIAGWNSPNCGLCFKATYKGKSIYVLAIDHAANGLNVGKTAMDALTGNQASQLGRIDTSVTRVDKKFCGL
>g5525.t1 | Effector probability: 0.887
MKFSIAIATLVSVMTASAFPIHKREVGGVLMCTGVNATGTCHYDVYELNKCHQLAEPFLLNINTFAPDGEAFSCYPRVTGCDDICRSPTGCTFGAVDFNYEHKYDLGAIKWDKLFKSFDCTAKKWSSNSTSTTSTRRTAY
>g6067.t1 | Effector probability: 0.834
MRFTCTTNLLLLCLTALVPSASAGFHLFLRYQNLCDIECNKKTDVCWPKHYVEWRVGAVPSSQYNCNAFKDDRNFPNVLPQSGQDFNWNGYNFPGICGTGSVDFWQTNNGQTLEVWVHNANPGQKVATCYKQQGNSIDCGRQSCYVTEVHDVWVCADTKLCS
>g6200.t1 | Effector probability: 0.594
MTLLSLLLRVAALALLATFSAPVSASPAIIVPWNITADQREDLKIVQRIDADSDLRKRFNAYRVFLALETPGWGSGPVCWLSYQEDLDTTQVNITIPADVAPNKSRIRISTGLLKKGAERVNGYSYSSRTTLLGANGTWSQRELDGWVISDENHVSCWAFGCARKCHERYYTGDKTQYSDGTSDGKADACVDQCVKDLNPQGGGSANSIPTLTVLAVGVAVGIAQMIF
>g6482.t1 | Effector probability: 0.619
MKLHVSTLLFFLPAAFGAWNCVLPVGSGDFGLCAEDGNQAGASACTSTNPCNTQGNGCTPLGSGLANCS
>g6547.t1 | Effector probability: 0.817
MFSSGLKITGLLFALANLIALASPKRILAIPAPVPNKIDLEERILFGWCRETKVTETCEDRYLDHGACYDFNSLDIYLDDNIETVNVTGGRCVIWERNDCGGDHTGMIMGTDVVMENVCPGYPWPRKASSLKCCGGDANAMFCANPGNKPKCTD
>g6986.t1 | Effector probability: 0.642
MRLSSLLTIAPLAWATVLVSYSAAKGDDTSALGLLNLQGWDRANWPSGKGMNSSVYFTTGTDPKGIAAAHVHKDAHFVRSEYHSLKSNTAQEQVYYIGYHVRFDKVDYQTIVWQWKNYDSDTVDTDNIPAAFVFRKDSDGGENHTINFGAQASPAGASKAGNTVWTKQLQMGTAYRFGMVINTSQDNGYIQLYFNGELVTLVEPSTGKHTQKLSGNFWPGPNKSSDPKFGLYGESTKTCDSYIYDIVIGTKLSEIADVAGIKS
>g7095.t1 | Effector probability: 0.797
MNFTNNFIVALTALTGLASAAFPKANEYKSHDCSGDLNYGHHAFDLHMVTMDDSSHSVYQAGTYWYMFDGKDQDSGRCEGEFLGQLTADYPPCLDLDGTVKDKRIRCLCNPLIGVSPGGGINSCQYV
>g7099.t1 | Effector probability: 0.872
MQIKALLFAPLVASGLVSAAPAASTKSAPFEILTLRSASPIHFNEVQAARNSIFLQLPNQKAVCDKKSDNAATFQIVDGVLHLYRSSGTQQTLFTDRSGMGQGVLQYATGDAPLPRNGERKGWKIDKNGDLTFNGSGFIACPGSISNSWSVWLDAGVSNPGGNKNCLGFTARTVKVSKPNSCKYTERK
>g7146.t1 | Effector probability: 0.974
MQFFKIMLLGVAAMLSVPGDACKCFRTNGGTNNGATHKCCNDYGGVYSGNDCKAGSISEHLRGFDKCCKGQSSDCDYPGRRSLEDEESF
>g7853.t1 | Effector probability: 0.69
MIASTILLGLLSLTAASPVPAAAAKPKYPLEETAKGFRLSVNVTDPSRDFHPSIQNTFVTSIHTGAGLALVGVINKGGRVFYQNGTTKEHRQGRATIITDGGTPLTPSGLKLTKDSKSKTLSSAHLDFGEGTPGVQLSSTKAYSFLLPETYLACNESLAYYQGEYFITIKQAKITKHSDGSVNRNIPKHCVPVRLVPECAKLEKLPKGSYSSHKYALDSQCYSDVSKIKWSKYGSV
>g7882.t1 | Effector probability: 0.669
MLVNVALSLALASGALAAPRALTPTRSSEELRAVWNYNKDSSSVSLAVYSADKSVFYGKAEGSTINTGSFAHYPLTFDVDKIGFGKVTFGNSTYLTRDNRKHSGGAICHRKFNADEAEVDCWLPGPAGFKPEAVYGAEKRQLQGVIPCQPKSTTYMIGDGDPHQNYYHKQISENIFCGASPSCAVGYEQSESYTIGFSVSADITSWLSGGFDVQKSWETGNSYTCYGAVGDTVCVWYNTAHTAYTVRSVTTQQAPCSNPVETVGDPVIIKSPNSNNRGGGYYCVIGTCRTKGDAYWDNSGPAGGPQ
>g8175.t1 | Effector probability: 0.618
MYFFRMLSFLAMSLAAPVVSADDRQLALDKINLARQAKGVPSLTWNPDLAAYAQFWANQMGSDAQPFAHAPLQYRPHQGETIYEHQSGHCDAAFDGPLQTAVHDWLLEGSIYDGQPIRTGQEPWLHWSQCMWSGTTQIGCARAYSISGPYKVYSVCRFLPEGNVIGQKPF
>g8184.t1 | Effector probability: 0.759
MKPVVSAFNAWSCTVLSVFAIVILSVIALLYRSGHEEFVGGKDDPEDGKAVAGTIFTAVIVYAVRNIDAHIDSSPIHAPTDHTRLYKY
>g8683.t1 | Effector probability: 0.743
MKSLLALSFFAASAIAGDWGQSCNGEIFDSSTGILTAQCNIGDGKGTFVEAKLDLYHCLKYTNGKISACRSPSSGRV
>g8774.t1 | Effector probability: 0.615
MARRLLHSLLFTAIIGSLGAVAGPCLPPIDNERPIRGGDFEDGKNPFTYSSDSKVRGSIVDGGYESDKKFYSFTMIDNKLLEMYQDIRTLPGTKYRCTYYWYFDTYYETLYDDGYYYVPYIRIYQNDDTEAIGNRYPTGPQQTGGWLDGHFDFTSSATGLDRIWFDAASPQPIDGEDGGRNNLSLDQISCQIR

## Sheet: CBS 125109
Supplementary Table 6. Predicted secretome for the Nectriaceous fungi studied
Name isolate	Target protein	Accession	Annotation	E-value	Score	Bias
Corinectria fuckeliana CBS 125109	Prot_2714	PF01073.14	3Beta_HSD	4.3e-06	20.4	0.2
Corinectria fuckeliana CBS 125109	Prot_7736	PF02737.13	3HCDH_N	0.0074	10.7	0.2
Corinectria fuckeliana CBS 125109	Prot_3436	PF12730.2	ABC-2 family transporter	0.0063	10.5	0
Corinectria fuckeliana CBS 125109	Prot_1416	PF00561.15	Abhydrolase_1	1.9e-16	55.1	0
Corinectria fuckeliana CBS 125109	Prot_1718	PF00561.15	Abhydrolase_1	1e-11	39.6	0.1
Corinectria fuckeliana CBS 125109	Prot_8987	PF00561.15	Abhydrolase_1	1.2e-09	32.8	0.1
Corinectria fuckeliana CBS 125109	Prot_6148	PF00561.15	Abhydrolase_1	1.3e-05	19.6	0.3
Corinectria fuckeliana CBS 125109	Prot_6867	PF00561.15	Abhydrolase_1	9.6e-06	20.1	0.1
Corinectria fuckeliana CBS 125109	Prot_9432	PF00561.15	Abhydrolase_1	0.00061	14.2	0
Corinectria fuckeliana CBS 125109	Prot_4279	PF02230.11	Abhydrolase_2	2.6e-05	18.6	0
Corinectria fuckeliana CBS 125109	Prot_6867	PF02230.11	Abhydrolase_2	0.009	10.2	0.1
Corinectria fuckeliana CBS 125109	Prot_5532	PF07859.8	Abhydrolase_3	9.5e-08	26.6	0.1
Corinectria fuckeliana CBS 125109	Prot_213	PF07859.8	Abhydrolase_3	5.2e-07	24.2	0.2
Corinectria fuckeliana CBS 125109	Prot_8987	PF07859.8	Abhydrolase_3	2.8e-05	18.6	0.1
Corinectria fuckeliana CBS 125109	Prot_6094	PF07859.8	Abhydrolase_3	0.00027	15.3	0.1
Corinectria fuckeliana CBS 125109	Prot_6867	PF07859.8	Abhydrolase_3	0.00042	14.7	0.2
Corinectria fuckeliana CBS 125109	Prot_1557	PF12695.2	Abhydrolase_5	5e-16	53.6	0
Corinectria fuckeliana CBS 125109	Prot_6025	PF12695.2	Abhydrolase_5	1.1e-15	52.4	0
Corinectria fuckeliana CBS 125109	Prot_1416	PF12695.2	Abhydrolase_5	2.2e-14	48.3	0.1
Corinectria fuckeliana CBS 125109	Prot_1718	PF12695.2	Abhydrolase_5	3.9e-13	44.2	0
Corinectria fuckeliana CBS 125109	Prot_8987	PF12695.2	Abhydrolase_5	5e-13	43.8	0.2
Corinectria fuckeliana CBS 125109	Prot_9432	PF12695.2	Abhydrolase_5	3.1e-11	38	0.1
Corinectria fuckeliana CBS 125109	Prot_6148	PF12695.2	Abhydrolase_5	4.2e-10	34.4	3
Corinectria fuckeliana CBS 125109	Prot_6867	PF12695.2	Abhydrolase_5	2.6e-09	31.8	0.2
Corinectria fuckeliana CBS 125109	Prot_8996	PF12695.2	Abhydrolase_5	8.4e-08	26.9	0
Corinectria fuckeliana CBS 125109	Prot_5275	PF12695.2	Abhydrolase_5	4.2e-06	21.4	0.1
Corinectria fuckeliana CBS 125109	Prot_2341	PF12695.2	Abhydrolase_5	2.6e-05	18.8	0.1
Corinectria fuckeliana CBS 125109	Prot_2843	PF12695.2	Abhydrolase_5	0.00029	15.4	2.7
Corinectria fuckeliana CBS 125109	Prot_6094	PF12695.2	Abhydrolase_5	0.00074	14.1	0.1
Corinectria fuckeliana CBS 125109	Prot_8358	PF12695.2	Abhydrolase_5	0.0015	13.2	0
Corinectria fuckeliana CBS 125109	Prot_5532	PF12695.2	Abhydrolase_5	0.0096	10.5	0
Corinectria fuckeliana CBS 125109	Prot_7829	PF12695.2	Abhydrolase_5	0.0055	11.3	0
Corinectria fuckeliana CBS 125109	Prot_213	PF12695.2	Abhydrolase_5	0.0069	11	0
Corinectria fuckeliana CBS 125109	Prot_10431	PF12695.2	Abhydrolase_5	0.22	6.1	0
Corinectria fuckeliana CBS 125109	Prot_1416	PF12697.2	Abhydrolase_6	4.8e-34	113	0.1
Corinectria fuckeliana CBS 125109	Prot_1718	PF12697.2	Abhydrolase_6	7.7e-30	99.2	0.8
Corinectria fuckeliana CBS 125109	Prot_9432	PF12697.2	Abhydrolase_6	7.3e-29	96	0.1
Corinectria fuckeliana CBS 125109	Prot_8996	PF12697.2	Abhydrolase_6	6.3e-20	66.8	1
Corinectria fuckeliana CBS 125109	Prot_6148	PF12697.2	Abhydrolase_6	3.9e-17	57.7	1.2
Corinectria fuckeliana CBS 125109	Prot_8987	PF12697.2	Abhydrolase_6	5.5e-14	47.4	1.1
Corinectria fuckeliana CBS 125109	Prot_6025	PF12697.2	Abhydrolase_6	1.2e-09	33.2	0.1
Corinectria fuckeliana CBS 125109	Prot_2843	PF12697.2	Abhydrolase_6	2.1e-06	22.6	0.8
Corinectria fuckeliana CBS 125109	Prot_6867	PF12697.2	Abhydrolase_6	3.2e-06	22	0
Corinectria fuckeliana CBS 125109	Prot_1557	PF12697.2	Abhydrolase_6	2.5e-05	19.1	0.1
Corinectria fuckeliana CBS 125109	Prot_7829	PF12697.2	Abhydrolase_6	2.4e-05	19.1	0.3
Corinectria fuckeliana CBS 125109	Prot_5275	PF12697.2	Abhydrolase_6	8.4e-05	17.3	0.2
Corinectria fuckeliana CBS 125109	Prot_4279	PF12697.2	Abhydrolase_6	0.00043	15	0.1
Corinectria fuckeliana CBS 125109	Prot_3856	PF12697.2	Abhydrolase_6	0.0021	12.8	0
Corinectria fuckeliana CBS 125109	Prot_6094	PF12697.2	Abhydrolase_6	0.0012	13.5	0.2
Corinectria fuckeliana CBS 125109	Prot_2341	PF12697.2	Abhydrolase_6	0.0025	12.5	0
Corinectria fuckeliana CBS 125109	Prot_6148	PF06259.7	Abhydrolase_8	1.8e-05	19.1	0.5
Corinectria fuckeliana CBS 125109	Prot_4279	PF10081.4	Abhydrolase_9	4.1e-06	20.5	0
Corinectria fuckeliana CBS 125109	Prot_2173	PF13336.1	AcetylCoA_hyd_C	0.0048	11.4	0.7
Corinectria fuckeliana CBS 125109	Prot_4265	PF12689.2	Acid_PPase	0.0005	14.5	0
Corinectria fuckeliana CBS 125109	Prot_2432	PF02439.10	Adeno_E3_CR2	0.011	10.1	1
Corinectria fuckeliana CBS 125109	Prot_2714	PF00106.20	adh_short	1.1e-25	85.3	1.5
Corinectria fuckeliana CBS 125109	Prot_2714	PF13561.1	adh_short_C2	1.8e-13	45.6	0
Corinectria fuckeliana CBS 125109	Prot_8973	PF05110.8	AF-4	0.3	3.6	18.7
Corinectria fuckeliana CBS 125109	Prot_4341	PF05110.8	AF-4	0.33	3.5	9.7
Corinectria fuckeliana CBS 125109	Prot_2709	PF05110.8	AF-4	0.45	3	23.7
Corinectria fuckeliana CBS 125109	Prot_10831	PF07468.6	Agglutinin	0.00045	15	0
Corinectria fuckeliana CBS 125109	Prot_748	PF00578.16	AhpC-TSA	1.3e-05	19.7	0
Corinectria fuckeliana CBS 125109	Prot_2251	PF15298.1	AJAP1_PANP_C	0.00014	16.6	10.8
Corinectria fuckeliana CBS 125109	Prot_5204	PF01262.16	AlaDh_PNT_C	0.00026	15.4	0.1
Corinectria fuckeliana CBS 125109	Prot_10388	PF01263.15	Aldose_epim	1.2e-48	160.6	0.1
Corinectria fuckeliana CBS 125109	Prot_8230	PF00245.15	Alk_phosphatase	7.2e-70	230.5	0.1
Corinectria fuckeliana CBS 125109	Prot_9459	PF00128.19	Alpha_amylase	2.7e-67	222.1	1.2
Corinectria fuckeliana CBS 125109	Prot_632	PF00128.19	Alpha_amylase	1.4e-62	206.7	1.1
Corinectria fuckeliana CBS 125109	Prot_7422	PF06964.7	Alpha-L-AF_C	2e-29	97.4	0
Corinectria fuckeliana CBS 125109	Prot_3191	PF03229.8	Alpha_GJ	0.031	9.5	10.5
Corinectria fuckeliana CBS 125109	Prot_5293	PF01979.15	Amidohydro_1	0.011	10.2	0
Corinectria fuckeliana CBS 125109	Prot_5293	PF07969.6	Amidohydro_3	6.9e-62	204.7	6.2
Corinectria fuckeliana CBS 125109	Prot_5293	PF13594.1	Urease_alpha	0.00048	14.8	0
Corinectria fuckeliana CBS 125109	Prot_9459	PF00266.14	Aminotran_5	0.0043	10.6	0
Corinectria fuckeliana CBS 125109	Prot_4745	PF01593.19	Amino_oxidase	3.6e-38	126.5	0.1
Corinectria fuckeliana CBS 125109	Prot_450	PF01593.19	Amino_oxidase	3.9e-09	30.8	0
Corinectria fuckeliana CBS 125109	Prot_5204	PF01593.19	Amino_oxidase	1e-07	26.2	0
Corinectria fuckeliana CBS 125109	Prot_10571	PF01593.19	Amino_oxidase	2.6e-07	24.8	0.1
Corinectria fuckeliana CBS 125109	Prot_2432	PF14828.1	Amnionless	2.1e-06	21.3	0
Corinectria fuckeliana CBS 125109	Prot_6129	PF00501.23	AMP-binding	7e-74	243.4	0
Corinectria fuckeliana CBS 125109	Prot_6129	PF13193.1	AMP-binding_C	4.3e-12	41.7	0.1
Corinectria fuckeliana CBS 125109	Prot_8429	PF02558.11	ApbA	0.0017	12.6	0.1
Corinectria fuckeliana CBS 125109	Prot_450	PF02558.11	ApbA	0.0036	11.6	0.1
Corinectria fuckeliana CBS 125109	Prot_9905	PF05918.6	API5	3.5	0.7	12.1
Corinectria fuckeliana CBS 125109	Prot_62	PF10351.4	Apt1	1.7	2.2	10.8
Corinectria fuckeliana CBS 125109	Prot_2709	PF10351.4	Apt1	8.3	-0.1	12.9
Corinectria fuckeliana CBS 125109	Prot_5806	PF01261.19	AP_endonuc_2	8.5e-05	16.7	0
Corinectria fuckeliana CBS 125109	Prot_6579	PF01731.15	Arylesterase	1.2e-05	20.1	0.1
Corinectria fuckeliana CBS 125109	Prot_8063	PF05935.6	Arylsulfotrans	1.9e-22	74.1	0.6
Corinectria fuckeliana CBS 125109	Prot_6709	PF05935.6	Arylsulfotrans	1.6e-13	44.7	0
Corinectria fuckeliana CBS 125109	Prot_6709	PF14269.1	Arylsulfotran_2	9.7e-68	223.2	0
Corinectria fuckeliana CBS 125109	Prot_8063	PF14269.1	Arylsulfotran_2	6.4e-49	161.5	0.9
Corinectria fuckeliana CBS 125109	Prot_2151	PF08688.5	ASD1	0.0012	13.5	0
Corinectria fuckeliana CBS 125109	Prot_5066	PF00026.18	Asp	1.9e-65	215.9	5
Corinectria fuckeliana CBS 125109	Prot_8410	PF00026.18	Asp	4.1e-64	211.6	10.6
Corinectria fuckeliana CBS 125109	Prot_5800	PF00026.18	Asp	3.2e-64	211.9	5.2
Corinectria fuckeliana CBS 125109	Prot_6877	PF00026.18	Asp	1e-35	118.3	2.6
Corinectria fuckeliana CBS 125109	Prot_2136	PF14521.1	Aspzincin_M35	1.7e-07	26.7	0.6
Corinectria fuckeliana CBS 125109	Prot_5219	PF14521.1	Aspzincin_M35	5e-06	21.9	0.4
Corinectria fuckeliana CBS 125109	Prot_11282	PF14521.1	Aspzincin_M35	0.0089	11.4	0.3
Corinectria fuckeliana CBS 125109	Prot_8410	PF13650.1	Asp_protease_2	1.4e-05	20.4	0.1
Corinectria fuckeliana CBS 125109	Prot_5800	PF13650.1	Asp_protease_2	0.013	10.9	0.1
Corinectria fuckeliana CBS 125109	Prot_5066	PF13650.1	Asp_protease_2	0.0097	11.3	0.1
Corinectria fuckeliana CBS 125109	Prot_6877	PF13650.1	Asp_protease_2	0.073	8.5	0
Corinectria fuckeliana CBS 125109	Prot_10831	PF01400.19	Astacin	2.8e-34	113	0
Corinectria fuckeliana CBS 125109	Prot_2014	PF04952.9	AstE_AspA	0.0059	10.3	0
Corinectria fuckeliana CBS 125109	Prot_4874	PF09451.5	ATG27	1e-06	23	0.1
Corinectria fuckeliana CBS 125109	Prot_8199	PF02038.11	ATP1_PLM_MAT8	0.0074	10.2	0.2
Corinectria fuckeliana CBS 125109	Prot_11294	PF03154.10	Atrophin-1	0.17	4.7	12.1
Corinectria fuckeliana CBS 125109	Prot_62	PF03154.10	Atrophin-1	1.3	1.8	12.5
Corinectria fuckeliana CBS 125109	Prot_5613	PF06989.7	BAALC_N	0.0035	12.5	0.3
Corinectria fuckeliana CBS 125109	Prot_6867	PF08840.6	BAAT_C	0.001	13.6	0.1
Corinectria fuckeliana CBS 125109	Prot_10455	PF04513.7	Baculo_PEP_C	0.0018	12.9	0.2
Corinectria fuckeliana CBS 125109	Prot_6646	PF00967.12	Barwin	7.9e-05	17.2	0.2
Corinectria fuckeliana CBS 125109	Prot_6645	PF08031.7	BBE	4.4e-15	50.2	0
Corinectria fuckeliana CBS 125109	Prot_8418	PF08031.7	BBE	6e-15	49.8	0.1
Corinectria fuckeliana CBS 125109	Prot_6344	PF08031.7	BBE	1.7e-14	48.3	0.1
Corinectria fuckeliana CBS 125109	Prot_10347	PF08031.7	BBE	1.4e-13	45.4	0.3
Corinectria fuckeliana CBS 125109	Prot_6285	PF08031.7	BBE	1.6e-12	42	0
Corinectria fuckeliana CBS 125109	Prot_3203	PF08031.7	BBE	1.1e-07	26.6	0
Corinectria fuckeliana CBS 125109	Prot_7598	PF08031.7	BBE	9.1e-06	20.4	0.3
Corinectria fuckeliana CBS 125109	Prot_9116	PF08031.7	BBE	5.9e-05	17.8	0
Corinectria fuckeliana CBS 125109	Prot_1997	PF00144.19	Beta-lactamase	9.8e-36	118.2	0.4
Corinectria fuckeliana CBS 125109	Prot_7344	PF00144.19	Beta-lactamase	2.7e-33	110.1	0.3
Corinectria fuckeliana CBS 125109	Prot_8435	PF13229.1	Beta_helix	2.6e-11	38.3	3.9
Corinectria fuckeliana CBS 125109	Prot_8424	PF13229.1	Beta_helix	1.2e-06	23.2	12.8
Corinectria fuckeliana CBS 125109	Prot_4014	PF13229.1	Beta_helix	0.00075	14.1	4.2
Corinectria fuckeliana CBS 125109	Prot_1711	PF13229.1	Beta_helix	0.0034	11.9	9.7
Corinectria fuckeliana CBS 125109	Prot_6862	PF13229.1	Beta_helix	0.038	8.5	11.5
Corinectria fuckeliana CBS 125109	Prot_1701	PF02012.15	BNR	0.0054	11.5	0.1
Corinectria fuckeliana CBS 125109	Prot_6687	PF02012.15	BNR	0.00044	14.8	0.3
Corinectria fuckeliana CBS 125109	Prot_7838	PF02012.15	BNR	0.027	9.4	0.1
Corinectria fuckeliana CBS 125109	Prot_6687	PF13088.1	BNR_2	7.1e-07	23.6	0
Corinectria fuckeliana CBS 125109	Prot_1701	PF13088.1	BNR_2	0.00029	15	0
Corinectria fuckeliana CBS 125109	Prot_8206	PF05262.6	Borrelia_P83	0.0013	11.9	0
Corinectria fuckeliana CBS 125109	Prot_8973	PF09073.5	BUD22	0.29	4.9	8.9
Corinectria fuckeliana CBS 125109	Prot_4581	PF09073.5	BUD22	0.57	3.9	27.1
Corinectria fuckeliana CBS 125109	Prot_7725	PF09792.4	But2	0.00073	14.1	0
Corinectria fuckeliana CBS 125109	Prot_5222	PF08603.6	CAP_C	0.032	8.4	2.7
Corinectria fuckeliana CBS 125109	Prot_686	PF13620.1	CarboxypepD_reg	8.5e-05	17.4	0.1
Corinectria fuckeliana CBS 125109	Prot_633	PF13620.1	CarboxypepD_reg	0.00044	15.1	0.7
Corinectria fuckeliana CBS 125109	Prot_1412	PF13620.1	CarboxypepD_reg	0.0086	11	1.2
Corinectria fuckeliana CBS 125109	Prot_1412	PF14683.1	CBM-like	1.8e-56	185.2	0
Corinectria fuckeliana CBS 125109	Prot_633	PF14683.1	CBM-like	2.7e-49	161.8	0.6
Corinectria fuckeliana CBS 125109	Prot_686	PF14683.1	CBM-like	2e-13	45.1	0
Corinectria fuckeliana CBS 125109	Prot_7609	PF00734.13	CBM_1	1.3e-13	45.2	15.1
Corinectria fuckeliana CBS 125109	Prot_5274	PF00734.13	CBM_1	2.4e-13	44.4	15.1
Corinectria fuckeliana CBS 125109	Prot_5806	PF00734.13	CBM_1	8.9e-13	42.5	8.2
Corinectria fuckeliana CBS 125109	Prot_10647	PF00734.13	CBM_1	3.1e-12	40.8	14.2
Corinectria fuckeliana CBS 125109	Prot_7838	PF00734.13	CBM_1	3e-11	37.7	8.3
Corinectria fuckeliana CBS 125109	Prot_3907	PF00734.13	CBM_1	0.54	4.9	0.8
Corinectria fuckeliana CBS 125109	Prot_3191	PF02018.12	CBM_4_9	9e-05	17.3	0.1
Corinectria fuckeliana CBS 125109	Prot_5204	PF15625.1	CC2D2AN-C2	0.0058	10.9	0.2
Corinectria fuckeliana CBS 125109	Prot_2036	PF14968.1	CCDC84	0.2	5.9	14
Corinectria fuckeliana CBS 125109	Prot_5488	PF14968.1	CCDC84	0.44	4.7	0.8
Corinectria fuckeliana CBS 125109	Prot_3436	PF09507.5	CDC27	0.019	8.9	28.6
Corinectria fuckeliana CBS 125109	Prot_7991	PF09507.5	CDC27	0.5	4.3	27.4
Corinectria fuckeliana CBS 125109	Prot_8973	PF02724.9	CDC45	0.25	4	8.1
Corinectria fuckeliana CBS 125109	Prot_5274	PF00150.13	Cellulase	7.5e-54	177.6	4
Corinectria fuckeliana CBS 125109	Prot_18	PF00150.13	Cellulase	1e-49	164	1.5
Corinectria fuckeliana CBS 125109	Prot_6492	PF00150.13	Cellulase	8.6e-24	79	3.3
Corinectria fuckeliana CBS 125109	Prot_4968	PF00150.13	Cellulase	5.4e-23	76.4	5.1
Corinectria fuckeliana CBS 125109	Prot_5806	PF00150.13	Cellulase	3.4e-20	67.1	0
Corinectria fuckeliana CBS 125109	Prot_4480	PF00150.13	Cellulase	1.4e-18	61.9	0.1
Corinectria fuckeliana CBS 125109	Prot_2323	PF00150.13	Cellulase	5e-17	56.8	6.7
Corinectria fuckeliana CBS 125109	Prot_6561	PF00150.13	Cellulase	2.6e-12	41.3	1.9
Corinectria fuckeliana CBS 125109	Prot_4480	PF12876.2	Cellulase-like	4.2e-08	28.4	0
Corinectria fuckeliana CBS 125109	Prot_5806	PF12876.2	Cellulase-like	1.2e-06	23.7	0
Corinectria fuckeliana CBS 125109	Prot_7898	PF07249.7	Cerato-platanin	3.9e-56	183	1.1
Corinectria fuckeliana CBS 125109	Prot_6695	PF07249.7	Cerato-platanin	2e-06	22.6	0.1
Corinectria fuckeliana CBS 125109	Prot_10252	PF05730.6	CFEM	2.3e-15	51	5.4
Corinectria fuckeliana CBS 125109	Prot_121	PF05730.6	CFEM	1.7e-06	22.6	15.3
Corinectria fuckeliana CBS 125109	Prot_10660	PF05730.6	CFEM	0.001	13.7	5.1
Corinectria fuckeliana CBS 125109	Prot_198	PF03174.8	CHB_HEX_C	1.5e-12	42	3.1
Corinectria fuckeliana CBS 125109	Prot_198	PF13290.1	CHB_HEX_C_1	2e-13	44.7	2.5
Corinectria fuckeliana CBS 125109	Prot_4174	PF00187.14	Chitin_bind_1	1.5e-06	23	18.7
Corinectria fuckeliana CBS 125109	Prot_8164	PF00187.14	Chitin_bind_1	8.3e-08	27	23.2
Corinectria fuckeliana CBS 125109	Prot_5423	PF00187.14	Chitin_bind_1	0.021	9.7	12.6
Corinectria fuckeliana CBS 125109	Prot_4581	PF00187.14	Chitin_bind_1	0.02	9.7	13.9
Corinectria fuckeliana CBS 125109	Prot_652	PF03067.10	LPMO_10	4.2e-05	18.7	0
Corinectria fuckeliana CBS 125109	Prot_1416	PF12740.2	Chlorophyllase2	0.00012	15.8	0
Corinectria fuckeliana CBS 125109	Prot_6025	PF12740.2	Chlorophyllase2	0.0024	11.6	0
Corinectria fuckeliana CBS 125109	Prot_8424	PF14592.1	Chondroitinas_B	9.6e-07	22.7	0
Corinectria fuckeliana CBS 125109	Prot_7724	PF06213.7	CobT	0.45	4.4	8.5
Corinectria fuckeliana CBS 125109	Prot_213	PF00135.23	Coesterase	6.5e-102	336.7	0
Corinectria fuckeliana CBS 125109	Prot_5532	PF00135.23	Coesterase	9.4e-74	243.7	0.1
Corinectria fuckeliana CBS 125109	Prot_6094	PF00135.23	Coesterase	5.8e-71	234.5	0
Corinectria fuckeliana CBS 125109	Prot_2181	PF00127.15	Copper-bind	0.00034	15.6	0.1
Corinectria fuckeliana CBS 125109	Prot_10571	PF00289.17	Biotin_carb_N	0.0022	12.9	0
Corinectria fuckeliana CBS 125109	Prot_9314	PF13299.1	CPSF100_C	12	0.9	12.3
Corinectria fuckeliana CBS 125109	Prot_11040	PF07143.6	CrtC	3.7e-10	34.3	0.1
Corinectria fuckeliana CBS 125109	Prot_7831	PF00313.17	CSD	0.0029	12.2	0
Corinectria fuckeliana CBS 125109	Prot_2251	PF04145.10	Ctr	0.064	8.1	0
Corinectria fuckeliana CBS 125109	Prot_522	PF00394.17	Cu-oxidase	1.7e-34	113.9	0.3
Corinectria fuckeliana CBS 125109	Prot_10268	PF00394.17	Cu-oxidase	8.3e-35	114.8	0.2
Corinectria fuckeliana CBS 125109	Prot_138	PF00394.17	Cu-oxidase	6.4e-32	105.5	0
Corinectria fuckeliana CBS 125109	Prot_138	PF07731.9	Cu-oxidase_2	1.1e-42	139.6	0
Corinectria fuckeliana CBS 125109	Prot_10268	PF07731.9	Cu-oxidase_2	3e-38	125.3	0.4
Corinectria fuckeliana CBS 125109	Prot_522	PF07731.9	Cu-oxidase_2	1e-39	130	0.6
Corinectria fuckeliana CBS 125109	Prot_10268	PF07732.10	Cu-oxidase_3	2.2e-42	138.3	0.5
Corinectria fuckeliana CBS 125109	Prot_138	PF07732.10	Cu-oxidase_3	4e-37	121.4	0.3
Corinectria fuckeliana CBS 125109	Prot_522	PF07732.10	Cu-oxidase_3	9.8e-39	126.6	1.6
Corinectria fuckeliana CBS 125109	Prot_3030	PF00190.17	Cupin_1	8.3e-11	36.3	0.2
Corinectria fuckeliana CBS 125109	Prot_10251	PF07883.6	Cupin_2	1.3e-06	22.7	0.5
Corinectria fuckeliana CBS 125109	Prot_3030	PF07883.6	Cupin_2	0.0095	10.3	0
Corinectria fuckeliana CBS 125109	Prot_10251	PF05899.7	Cupin_3	0.2	5.9	0
Corinectria fuckeliana CBS 125109	Prot_4112	PF13473.1	Cupredoxin1	0.0015	13.3	0
Corinectria fuckeliana CBS 125109	Prot_4279	PF01083.17	Cutinase	2.1e-52	172.3	4.4
Corinectria fuckeliana CBS 125109	Prot_8358	PF01083.17	Cutinase	1.6e-43	143.3	0.3
Corinectria fuckeliana CBS 125109	Prot_2843	PF01083.17	Cutinase	1.3e-05	19.8	0.7
Corinectria fuckeliana CBS 125109	Prot_5275	PF01083.17	Cutinase	0.0062	11.1	0.2
Corinectria fuckeliana CBS 125109	Prot_8987	PF01083.17	Cutinase	0.005	11.4	0
Corinectria fuckeliana CBS 125109	Prot_4333	PF07833.6	Cu_amine_oxidN1	0.75	5	0.5
Corinectria fuckeliana CBS 125109	Prot_2181	PF02298.12	Cu_bind_like	2.8e-05	18.7	0.1
Corinectria fuckeliana CBS 125109	Prot_8973	PF04889.7	Cwf_Cwc_15	0.3	5.5	9.4
Corinectria fuckeliana CBS 125109	Prot_2668	PF09786.4	CytochromB561_N	1.8	1.7	15.3
Corinectria fuckeliana CBS 125109	Prot_8418	PF09265.5	Cytokin-bind	0.0075	10.2	0
Corinectria fuckeliana CBS 125109	Prot_6300	PF01266.19	DAO	7.5e-07	23.1	0.3
Corinectria fuckeliana CBS 125109	Prot_10571	PF01266.19	DAO	4e-08	27.3	0.1
Corinectria fuckeliana CBS 125109	Prot_5204	PF01266.19	DAO	1.5e-08	28.7	1.1
Corinectria fuckeliana CBS 125109	Prot_450	PF01266.19	DAO	1.1e-06	22.6	0.1
Corinectria fuckeliana CBS 125109	Prot_10342	PF01266.19	DAO	1.2e-05	19.2	0
Corinectria fuckeliana CBS 125109	Prot_8429	PF01266.19	DAO	4.9e-05	17.1	0.5
Corinectria fuckeliana CBS 125109	Prot_7736	PF01266.19	DAO	1.5e-06	22.2	0.9
Corinectria fuckeliana CBS 125109	Prot_5394	PF01266.19	DAO	0.0023	11.7	11.2
Corinectria fuckeliana CBS 125109	Prot_121	PF03605.9	DcuA_DcuB	0.051	7.1	0
Corinectria fuckeliana CBS 125109	Prot_276	PF03345.9	DDOST_48kD	1.5e-156	515.9	0
Corinectria fuckeliana CBS 125109	Prot_2125	PF08841.5	DDR	0.0015	12.2	0.2
Corinectria fuckeliana CBS 125109	Prot_9314	PF14286.1	DHHW	2	2.4	11.3
Corinectria fuckeliana CBS 125109	Prot_1886	PF01180.16	DHO_dh	5.6e-06	20.3	0.3
Corinectria fuckeliana CBS 125109	Prot_323	PF05086.7	Dicty_REP	0.5	2.8	6.3
Corinectria fuckeliana CBS 125109	Prot_1818	PF05086.7	Dicty_REP	0.69	2.3	6.9
Corinectria fuckeliana CBS 125109	Prot_11294	PF05086.7	Dicty_REP	12	-1.8	16.5
Corinectria fuckeliana CBS 125109	Prot_2341	PF12374.3	Dmrt1	0.043	9	0.8
Corinectria fuckeliana CBS 125109	Prot_2151	PF14743.1	DNA_ligase_OB_2	0.0025	12.3	0
Corinectria fuckeliana CBS 125109	Prot_6148	PF04081.8	DNA_pol_delta_4	0.005	12	0
Corinectria fuckeliana CBS 125109	Prot_9314	PF00242.12	DNA_pol_viral_N	0.058	7.2	9.2
Corinectria fuckeliana CBS 125109	Prot_8440	PF00242.12	DNA_pol_viral_N	2.5	1.8	11
Corinectria fuckeliana CBS 125109	Prot_4581	PF00242.12	DNA_pol_viral_N	4.1	1.1	14.5
Corinectria fuckeliana CBS 125109	Prot_62	PF00242.12	DNA_pol_viral_N	11	-0.3	12.8
Corinectria fuckeliana CBS 125109	Prot_6646	PF03330.13	DPBB_1	1e-08	29.9	0.2
Corinectria fuckeliana CBS 125109	Prot_2341	PF00930.16	DPPIV_N	7.1e-104	341.9	0.2
Corinectria fuckeliana CBS 125109	Prot_8185	PF06280.7	fn3_5	1.7e-15	52.3	0.1
Corinectria fuckeliana CBS 125109	Prot_6509	PF06280.7	fn3_5	7.4e-15	50.2	0
Corinectria fuckeliana CBS 125109	Prot_6292	PF06439.6	DUF1080	0.0017	13.1	0
Corinectria fuckeliana CBS 125109	Prot_9353	PF06679.7	DUF1180	0.083	7.6	6.4
Corinectria fuckeliana CBS 125109	Prot_1272	PF06682.7	SARAF	1.7e-80	265.8	15.4
Corinectria fuckeliana CBS 125109	Prot_7030	PF06824.6	Glyco_hydro_125	2.9e-109	360.2	0
Corinectria fuckeliana CBS 125109	Prot_8214	PF06949.6	DUF1292	0.012	10.8	0.1
Corinectria fuckeliana CBS 125109	Prot_1708	PF07466.6	DUF1517	0.23	5.1	18.5
Corinectria fuckeliana CBS 125109	Prot_3065	PF07466.6	DUF1517	0.1	6.3	4.5
Corinectria fuckeliana CBS 125109	Prot_2636	PF07510.6	DUF1524	5.9e-13	43.7	0
Corinectria fuckeliana CBS 125109	Prot_8435	PF07602.6	DUF1565	0.26	5.1	0.1
Corinectria fuckeliana CBS 125109	Prot_9378	PF07628.6	DUF1589	0.0019	12.9	0
Corinectria fuckeliana CBS 125109	Prot_4747	PF07774.8	EMC1_C	4.1e-63	207.3	0
Corinectria fuckeliana CBS 125109	Prot_6292	PF09224.6	DUF1961	9.4e-80	261.6	0
Corinectria fuckeliana CBS 125109	Prot_632	PF09260.6	DUF1966	4e-30	98.6	1.4
Corinectria fuckeliana CBS 125109	Prot_9459	PF09260.6	DUF1966	1.1e-06	23.5	0
Corinectria fuckeliana CBS 125109	Prot_9160	PF09301.5	DUF1970	0.5	5.3	7.2
Corinectria fuckeliana CBS 125109	Prot_2151	PF09435.5	DUF2015	1.3e-47	155.6	0
Corinectria fuckeliana CBS 125109	Prot_2173	PF09884.4	DUF2111	0.0031	12.2	0.6
Corinectria fuckeliana CBS 125109	Prot_1761	PF09949.4	DUF2183	1.8e-18	61.2	0.1
Corinectria fuckeliana CBS 125109	Prot_2709	PF13203.1	DUF2201_N	0.0071	10.3	4.6
Corinectria fuckeliana CBS 125109	Prot_8230	PF02995.12	DUF229	0.00011	15.5	0.2
Corinectria fuckeliana CBS 125109	Prot_6148	PF10230.4	LIDHydrolase	0.0023	12.2	0.1
Corinectria fuckeliana CBS 125109	Prot_2036	PF10310.4	DUF5427	0.078	6.5	22.1
Corinectria fuckeliana CBS 125109	Prot_9314	PF10310.4	DUF5427	0.98	2.9	15.3
Corinectria fuckeliana CBS 125109	Prot_7991	PF10310.4	DUF5427	1.2	2.6	21.3
Corinectria fuckeliana CBS 125109	Prot_1867	PF10880.3	DUF2673	0.0072	11.2	0
Corinectria fuckeliana CBS 125109	Prot_61	PF10916.3	DUF2712	0.064	8	0
Corinectria fuckeliana CBS 125109	Prot_2014	PF10994.3	DUF2817	0.00019	15.4	0
Corinectria fuckeliana CBS 125109	Prot_4279	PF11187.3	DUF2974	0.0002	15.6	0.1
Corinectria fuckeliana CBS 125109	Prot_11294	PF11240.3	DUF3042	0.053	8.2	0.7
Corinectria fuckeliana CBS 125109	Prot_4333	PF11259.3	DUF3060	0.0018	12.7	0.2
Corinectria fuckeliana CBS 125109	Prot_9432	PF11288.3	DUF3089	0.0022	11.9	0.1
Corinectria fuckeliana CBS 125109	Prot_2674	PF11327.3	Egh16-like	1.6e-57	189.1	13.4
Corinectria fuckeliana CBS 125109	Prot_2251	PF11748.3	DUF3306	0.59	5.6	0
Corinectria fuckeliana CBS 125109	Prot_5433	PF11928.3	DUF3446	0.0072	11.4	1.9
Corinectria fuckeliana CBS 125109	Prot_8838	PF11937.3	DUF3455	4.8e-26	86.6	0
Corinectria fuckeliana CBS 125109	Prot_726	PF03988.7	ArfA	0.0069	11.1	0.9
Corinectria fuckeliana CBS 125109	Prot_726	PF11980.3	DUF3481	0.00056	14.6	0
Corinectria fuckeliana CBS 125109	Prot_8667	PF11999.3	DUF3494	8.7e-62	203.2	22.8
Corinectria fuckeliana CBS 125109	Prot_1688	PF12004.3	DUF3498	0.0019	12.2	2.5
Corinectria fuckeliana CBS 125109	Prot_4333	PF04019.7	DUF359	0.013	9.7	0.1
Corinectria fuckeliana CBS 125109	Prot_726	PF12158.3	DUF3592	0.015	9.9	4.2
Corinectria fuckeliana CBS 125109	Prot_3839	PF12526.3	DUF3729	0.047	9.9	7.6
Corinectria fuckeliana CBS 125109	Prot_6201	PF12609.3	DUF3774	0.00072	15.2	1
Corinectria fuckeliana CBS 125109	Prot_11246	PF13128.1	DUF3954	0.59	4.5	0.2
Corinectria fuckeliana CBS 125109	Prot_4747	PF13313.1	DUF4082	0.0056	10.9	0
Corinectria fuckeliana CBS 125109	Prot_7991	PF14219.1	DUF4328	0.0013	12.8	0
Corinectria fuckeliana CBS 125109	Prot_8199	PF14283.1	DUF4366	6.8e-05	17.2	0.2
Corinectria fuckeliana CBS 125109	Prot_2251	PF14283.1	DUF4366	0.00016	16	1
Corinectria fuckeliana CBS 125109	Prot_4181	PF14283.1	DUF4366	0.00085	13.6	0
Corinectria fuckeliana CBS 125109	Prot_9378	PF14377.1	UBM	0.0054	11.5	0.1
Corinectria fuckeliana CBS 125109	Prot_10556	PF14610.1	DUF4448	0.0018	12.6	0
Corinectria fuckeliana CBS 125109	Prot_198	PF15057.1	DUF4537	0.019	9.6	0
Corinectria fuckeliana CBS 125109	Prot_6850	PF04305.9	DUF455	0.005	10.9	0
Corinectria fuckeliana CBS 125109	Prot_3436	PF15087.1	DUF4551	0.35	3.9	18.3
Corinectria fuckeliana CBS 125109	Prot_8754	PF15087.1	DUF4551	1.8	1.5	9.2
Corinectria fuckeliana CBS 125109	Prot_854	PF15377.1	DUF4604	0.48	5.4	15.4
Corinectria fuckeliana CBS 125109	Prot_7724	PF15387.1	DUF4611	0.034	9.2	5.3
Corinectria fuckeliana CBS 125109	Prot_62	PF15391.1	DUF4614	0.017	9.7	8.7
Corinectria fuckeliana CBS 125109	Prot_11294	PF15465.1	DUF4634	0.02	9.9	6
Corinectria fuckeliana CBS 125109	Prot_8199	PF04415.7	DUF515	0.11	5.5	8
Corinectria fuckeliana CBS 125109	Prot_2432	PF04415.7	DUF515	0.024	7.6	2.4
Corinectria fuckeliana CBS 125109	Prot_4181	PF04415.7	DUF515	0.91	2.4	9.4
Corinectria fuckeliana CBS 125109	Prot_2709	PF04415.7	DUF515	5.3	-0.1	18.2
Corinectria fuckeliana CBS 125109	Prot_7991	PF04484.7	QWRF	1.1	3.5	22.7
Corinectria fuckeliana CBS 125109	Prot_9314	PF04484.7	QWRF	1.5	3	17.3
Corinectria fuckeliana CBS 125109	Prot_836	PF04484.7	QWRF	4.1	1.6	20.8
Corinectria fuckeliana CBS 125109	Prot_2036	PF04502.8	DUF572	1.8	2.4	25.4
Corinectria fuckeliana CBS 125109	Prot_7750	PF04652.11	Vta1	0.0067	10.6	9
Corinectria fuckeliana CBS 125109	Prot_7991	PF04652.11	Vta1	0.056	7.6	17.5
Corinectria fuckeliana CBS 125109	Prot_9378	PF05338.7	DUF717	1.6	3.6	0.1
Corinectria fuckeliana CBS 125109	Prot_2668	PF06136.8	DUF963	0.85	3.7	13.9
Corinectria fuckeliana CBS 125109	Prot_2998	PF02221.10	E1_DerP2_DerF2	5.8e-25	82.9	0.1
Corinectria fuckeliana CBS 125109	Prot_2036	PF05505.7	Ebola_NP	0.18	4.5	11.5
Corinectria fuckeliana CBS 125109	Prot_249	PF12454.3	Ecm33	0.0043	11.8	0.1
Corinectria fuckeliana CBS 125109	Prot_5613	PF00008.22	EGF	0.014	10.2	4.8
Corinectria fuckeliana CBS 125109	Prot_5613	PF07974.8	EGF_2	4.9e-05	18.3	9.8
Corinectria fuckeliana CBS 125109	Prot_2389	PF08662.6	eIF2A	0.015	9.8	0
Corinectria fuckeliana CBS 125109	Prot_7991	PF14575.1	EphA2_TM	0.0055	11.9	0
Corinectria fuckeliana CBS 125109	Prot_726	PF14575.1	EphA2_TM	0.015	10.6	0
Corinectria fuckeliana CBS 125109	Prot_2714	PF01370.16	Epimerase	7.6e-08	26.8	0
Corinectria fuckeliana CBS 125109	Prot_748	PF07749.7	ERp29	1.8e-24	81.1	0.1
Corinectria fuckeliana CBS 125109	Prot_6867	PF10503.4	Esterase_phd	8.7e-27	88.6	0.5
Corinectria fuckeliana CBS 125109	Prot_2122	PF03372.18	Exo_endo_phos	1.1e-15	53.1	0.7
Corinectria fuckeliana CBS 125109	Prot_7757	PF03372.18	Exo_endo_phos	1.9e-14	49	0.2
Corinectria fuckeliana CBS 125109	Prot_7757	PF14529.1	Exo_endo_phos_2	0.0039	11.6	0
Corinectria fuckeliana CBS 125109	Prot_2122	PF14529.1	Exo_endo_phos_2	0.024	9.1	0.7
Corinectria fuckeliana CBS 125109	Prot_198	PF00754.20	F5_F8_type_C	3.3e-06	21.8	0.7
Corinectria fuckeliana CBS 125109	Prot_9186	PF00667.15	FAD_binding_1	3.7e-60	197.9	0
Corinectria fuckeliana CBS 125109	Prot_7736	PF00890.19	FAD_binding_2	7.2e-93	306.4	0.4
Corinectria fuckeliana CBS 125109	Prot_5204	PF00890.19	FAD_binding_2	1.9e-08	28.3	2.8
Corinectria fuckeliana CBS 125109	Prot_6300	PF00890.19	FAD_binding_2	6.4e-08	26.6	0.3
Corinectria fuckeliana CBS 125109	Prot_8429	PF00890.19	FAD_binding_2	1.4e-06	22.1	3.8
Corinectria fuckeliana CBS 125109	Prot_10571	PF00890.19	FAD_binding_2	3.4e-07	24.2	0
Corinectria fuckeliana CBS 125109	Prot_450	PF00890.19	FAD_binding_2	0.0032	11.1	0.1
Corinectria fuckeliana CBS 125109	Prot_10342	PF00890.19	FAD_binding_2	0.0055	10.3	0.1
Corinectria fuckeliana CBS 125109	Prot_5394	PF00890.19	FAD_binding_2	0.025	8.2	5.8
Corinectria fuckeliana CBS 125109	Prot_7736	PF01494.14	FAD_binding_3	1.5e-08	28.9	0.1
Corinectria fuckeliana CBS 125109	Prot_6300	PF01494.14	FAD_binding_3	1.8e-08	28.6	0.7
Corinectria fuckeliana CBS 125109	Prot_5204	PF01494.14	FAD_binding_3	6.6e-07	23.4	0.2
Corinectria fuckeliana CBS 125109	Prot_4745	PF01494.14	FAD_binding_3	0.0018	12.2	0.2
Corinectria fuckeliana CBS 125109	Prot_6645	PF01565.18	FAD_binding_4	7.3e-28	91.6	4.8
Corinectria fuckeliana CBS 125109	Prot_6344	PF01565.18	FAD_binding_4	4.1e-27	89.2	3.5
Corinectria fuckeliana CBS 125109	Prot_1622	PF01565.18	FAD_binding_4	3.5e-26	86.2	0.6
Corinectria fuckeliana CBS 125109	Prot_7598	PF01565.18	FAD_binding_4	1.2e-23	77.9	0.3
Corinectria fuckeliana CBS 125109	Prot_3203	PF01565.18	FAD_binding_4	2.9e-20	67	1.6
Corinectria fuckeliana CBS 125109	Prot_8418	PF01565.18	FAD_binding_4	6.8e-20	65.8	0.6
Corinectria fuckeliana CBS 125109	Prot_6285	PF01565.18	FAD_binding_4	1.8e-18	61.2	0.7
Corinectria fuckeliana CBS 125109	Prot_9116	PF01565.18	FAD_binding_4	1.3e-15	51.9	0.9
Corinectria fuckeliana CBS 125109	Prot_10347	PF01565.18	FAD_binding_4	1.5e-10	35.5	2.1
Corinectria fuckeliana CBS 125109	Prot_5204	PF12831.2	FAD_oxidored	3.9e-10	34.1	0.2
Corinectria fuckeliana CBS 125109	Prot_6300	PF12831.2	FAD_oxidored	4.5e-08	27.3	0.6
Corinectria fuckeliana CBS 125109	Prot_10571	PF12831.2	FAD_oxidored	2.1e-07	25.1	0
Corinectria fuckeliana CBS 125109	Prot_7736	PF12831.2	FAD_oxidored	6e-06	20.3	0.1
Corinectria fuckeliana CBS 125109	Prot_3436	PF15265.1	FAM196	1.2	3	27.5
Corinectria fuckeliana CBS 125109	Prot_6692	PF07174.6	FAP	0.71	3.9	14.7
Corinectria fuckeliana CBS 125109	Prot_7443	PF02469.17	Fasciclin	1.7e-18	61.7	0
Corinectria fuckeliana CBS 125109	Prot_1143	PF02469.17	Fasciclin	2.7e-18	61	0
Corinectria fuckeliana CBS 125109	Prot_187	PF02469.17	Fasciclin	2.9e-18	60.9	0.4
Corinectria fuckeliana CBS 125109	Prot_1705	PF02469.17	Fasciclin	6.4e-06	21	0
Corinectria fuckeliana CBS 125109	Prot_2567	PF08368.7	FAST_2	0.4	6	0.1
Corinectria fuckeliana CBS 125109	Prot_8440	PF09532.5	FDF	0.079	8.4	5
Corinectria fuckeliana CBS 125109	Prot_5025	PF14691.1	Fer4_20	0.36	5.3	1.1
Corinectria fuckeliana CBS 125109	Prot_6850	PF13668.1	Ferritin_2	1.7e-45	149.1	0.3
Corinectria fuckeliana CBS 125109	Prot_2125	PF02782.11	FGGY_C	0.0058	11.1	0
Corinectria fuckeliana CBS 125109	Prot_8199	PF05545.6	FixQ	0.00026	15.4	0.2
Corinectria fuckeliana CBS 125109	Prot_5780	PF00254.23	FKBP_C	6.4e-34	110.7	0
Corinectria fuckeliana CBS 125109	Prot_8629	PF08884.6	Flagellin_D3	0.013	10.5	0.8
Corinectria fuckeliana CBS 125109	Prot_748	PF07196.8	Flagellin_IN	0.26	6.2	0.2
Corinectria fuckeliana CBS 125109	Prot_9186	PF00258.20	Flavodoxin_1	9.8e-34	111.2	0.2
Corinectria fuckeliana CBS 125109	Prot_8185	PF13860.1	FlgD_ig	6.6e-06	20.7	0
Corinectria fuckeliana CBS 125109	Prot_6937	PF13860.1	FlgD_ig	0.00092	13.8	0.2
Corinectria fuckeliana CBS 125109	Prot_5980	PF04205.9	FMN_bind	0.013	10.5	1.3
Corinectria fuckeliana CBS 125109	Prot_1886	PF01070.13	FMN_dh	1.6e-115	380.5	0
Corinectria fuckeliana CBS 125109	Prot_10283	PF01070.13	FMN_dh	2.7e-51	169.2	0
Corinectria fuckeliana CBS 125109	Prot_9945	PF14310.1	Fn3-like	1.4e-10	35.8	0
Corinectria fuckeliana CBS 125109	Prot_1412	PF14686.1	fn3_3	9.3e-19	62.2	3.3
Corinectria fuckeliana CBS 125109	Prot_633	PF14686.1	fn3_3	1.2e-15	52.2	1.9
Corinectria fuckeliana CBS 125109	Prot_686	PF14686.1	fn3_3	2.1e-11	38.6	0.1
Corinectria fuckeliana CBS 125109	Prot_198	PF13287.1	Fn3_assoc	2.4e-13	44.8	4
Corinectria fuckeliana CBS 125109	Prot_9290	PF02434.11	Fringe	0.00013	16.1	0
Corinectria fuckeliana CBS 125109	Prot_6867	PF03959.8	FSH1	0.27	5.4	0.1
Corinectria fuckeliana CBS 125109	Prot_8230	PF13093.1	FTA4	0.0073	10.5	0
Corinectria fuckeliana CBS 125109	Prot_62	PF04930.10	FUN14	0.0061	11.7	0
Corinectria fuckeliana CBS 125109	Prot_5800	PF13975.1	gag-asp_proteas	0.16	6.7	0
Corinectria fuckeliana CBS 125109	Prot_2287	PF06202.9	GDE_C	0.00021	14.9	0
Corinectria fuckeliana CBS 125109	Prot_9459	PF14871.1	GHL6	0.00081	14.2	0
Corinectria fuckeliana CBS 125109	Prot_5204	PF01134.17	GIDA	1.5e-06	22.1	0.7
Corinectria fuckeliana CBS 125109	Prot_6300	PF01134.17	GIDA	1.8e-06	21.9	0.1
Corinectria fuckeliana CBS 125109	Prot_7736	PF01134.17	GIDA	7.6e-06	19.8	0.3
Corinectria fuckeliana CBS 125109	Prot_10571	PF01134.17	GIDA	2.2e-05	18.3	0
Corinectria fuckeliana CBS 125109	Prot_450	PF01134.17	GIDA	0.0023	11.6	0.2
Corinectria fuckeliana CBS 125109	Prot_10342	PF01134.17	GIDA	0.16	5.5	0
Corinectria fuckeliana CBS 125109	Prot_4333	PF13856.1	Gifsy-2	1.4	3.9	0.3
Corinectria fuckeliana CBS 125109	Prot_9913	PF01832.15	Glucosaminidase	0.19	6.6	0
Corinectria fuckeliana CBS 125109	Prot_748	PF00462.19	Glutaredoxin	0.39	5.6	0
Corinectria fuckeliana CBS 125109	Prot_1886	PF01645.12	Glu_synthase	3.9e-08	27.3	0.1
Corinectria fuckeliana CBS 125109	Prot_10283	PF01645.12	Glu_synthase	0.0026	11.5	0
Corinectria fuckeliana CBS 125109	Prot_8199	PF01102.13	Glycophorin_A	0.00061	14.4	0.5
Corinectria fuckeliana CBS 125109	Prot_27	PF00232.13	Glyco_hydro_1	4e-75	247.5	0.6
Corinectria fuckeliana CBS 125109	Prot_4480	PF00331.15	Glyco_hydro_10	0.0048	10.7	0
Corinectria fuckeliana CBS 125109	Prot_7820	PF00457.12	Glyco_hydro_11	1.6e-82	270.1	21
Corinectria fuckeliana CBS 125109	Prot_2492	PF00457.12	Glyco_hydro_11	1e-80	264.2	18.9
Corinectria fuckeliana CBS 125109	Prot_9762	PF01670.11	Glyco_hydro_12	5.5e-19	63.3	1.1
Corinectria fuckeliana CBS 125109	Prot_9168	PF01670.11	Glyco_hydro_12	1.5e-09	32.6	0.1
Corinectria fuckeliana CBS 125109	Prot_4581	PF00722.16	Glyco_hydro_16	1.4e-45	149.7	3.3
Corinectria fuckeliana CBS 125109	Prot_5423	PF00722.16	Glyco_hydro_16	2.1e-45	149.1	4.4
Corinectria fuckeliana CBS 125109	Prot_2824	PF00722.16	Glyco_hydro_16	8.7e-44	143.8	1.9
Corinectria fuckeliana CBS 125109	Prot_62	PF00722.16	Glyco_hydro_16	2e-42	139.4	6.4
Corinectria fuckeliana CBS 125109	Prot_2036	PF00722.16	Glyco_hydro_16	4.3e-42	138.3	1.2
Corinectria fuckeliana CBS 125109	Prot_9392	PF00722.16	Glyco_hydro_16	4.6e-40	131.7	2
Corinectria fuckeliana CBS 125109	Prot_249	PF00722.16	Glyco_hydro_16	3.8e-39	128.7	3
Corinectria fuckeliana CBS 125109	Prot_11368	PF00722.16	Glyco_hydro_16	2.8e-16	54.1	0.1
Corinectria fuckeliana CBS 125109	Prot_6312	PF00722.16	Glyco_hydro_16	4.5e-15	50.2	0.6
Corinectria fuckeliana CBS 125109	Prot_269	PF00722.16	Glyco_hydro_16	8e-12	39.6	3.1
Corinectria fuckeliana CBS 125109	Prot_6227	PF00722.16	Glyco_hydro_16	0.00058	14	0
Corinectria fuckeliana CBS 125109	Prot_8276	PF00332.13	Glyco_hydro_17	8.2e-19	62.5	0.7
Corinectria fuckeliana CBS 125109	Prot_4064	PF00332.13	Glyco_hydro_17	7.5e-05	16.7	0.5
Corinectria fuckeliana CBS 125109	Prot_8680	PF00704.23	Glyco_hydro_18	9.8e-93	306	13
Corinectria fuckeliana CBS 125109	Prot_8164	PF00704.23	Glyco_hydro_18	8.6e-45	148.4	2.2
Corinectria fuckeliana CBS 125109	Prot_5545	PF02838.10	Glyco_hydro_20b	3.5e-21	70.9	0.1
Corinectria fuckeliana CBS 125109	Prot_2173	PF00295.12	Glyco_hydro_28	1.8e-106	350.5	20.3
Corinectria fuckeliana CBS 125109	Prot_1711	PF00295.12	Glyco_hydro_28	5.3e-42	138.7	5.9
Corinectria fuckeliana CBS 125109	Prot_6862	PF00295.12	Glyco_hydro_28	2.8e-39	129.7	4.1
Corinectria fuckeliana CBS 125109	Prot_4014	PF00295.12	Glyco_hydro_28	1.3e-35	117.7	6.7
Corinectria fuckeliana CBS 125109	Prot_3212	PF00295.12	Glyco_hydro_28	1.7e-24	81.1	0
Corinectria fuckeliana CBS 125109	Prot_4480	PF02836.12	Glyco_hydro_2_C	2.9e-05	17.9	0
Corinectria fuckeliana CBS 125109	Prot_9729	PF02836.12	Glyco_hydro_2_C	3.9e-06	20.7	0
Corinectria fuckeliana CBS 125109	Prot_9945	PF00933.16	Glyco_hydro_3	3e-87	287.1	0
Corinectria fuckeliana CBS 125109	Prot_10006	PF00251.15	Glyco_hydro_32N	1.7e-05	19.1	0
Corinectria fuckeliana CBS 125109	Prot_9945	PF01915.17	Glyco_hydro_3_C	7.4e-57	187.2	0
Corinectria fuckeliana CBS 125109	Prot_4480	PF02449.10	Glyco_hydro_42	0.00011	16.2	0
Corinectria fuckeliana CBS 125109	Prot_5806	PF02449.10	Glyco_hydro_42	0.0016	12.4	0
Corinectria fuckeliana CBS 125109	Prot_10006	PF04616.9	Glyco_hydro_43	7.4e-56	184.1	4
Corinectria fuckeliana CBS 125109	Prot_9223	PF04616.9	Glyco_hydro_43	4.9e-44	145.3	5.3
Corinectria fuckeliana CBS 125109	Prot_8629	PF04616.9	Glyco_hydro_43	1.5e-30	101	8.9
Corinectria fuckeliana CBS 125109	Prot_732	PF04616.9	Glyco_hydro_43	1.3e-21	71.7	0
Corinectria fuckeliana CBS 125109	Prot_8214	PF04616.9	Glyco_hydro_43	3.5e-14	47.3	6.2
Corinectria fuckeliana CBS 125109	Prot_3190	PF01532.15	Glyco_hydro_47	7.1e-133	438.3	0
Corinectria fuckeliana CBS 125109	Prot_4724	PF01532.15	Glyco_hydro_47	3.9e-82	271	0
Corinectria fuckeliana CBS 125109	Prot_3134	PF07745.8	Glyco_hydro_53	7.8e-105	345.1	0.1
Corinectria fuckeliana CBS 125109	Prot_7609	PF01341.12	Glyco_hydro_6	1.5e-109	360.8	3.1
Corinectria fuckeliana CBS 125109	Prot_7831	PF03443.9	Glyco_hydro_61	8e-79	259.2	0
Corinectria fuckeliana CBS 125109	Prot_10647	PF03443.9	Glyco_hydro_61	9.4e-77	252.5	0
Corinectria fuckeliana CBS 125109	Prot_6635	PF03443.9	Glyco_hydro_61	1.8e-76	251.6	0
Corinectria fuckeliana CBS 125109	Prot_703	PF03443.9	Glyco_hydro_61	6.3e-75	246.5	0.2
Corinectria fuckeliana CBS 125109	Prot_5367	PF03443.9	Glyco_hydro_61	2.8e-53	175.8	0.1
Corinectria fuckeliana CBS 125109	Prot_652	PF03443.9	Glyco_hydro_61	5.1e-06	21.2	0
Corinectria fuckeliana CBS 125109	Prot_5545	PF03648.9	Glyco_hydro_67N	5.2e-07	24.6	0.3
Corinectria fuckeliana CBS 125109	Prot_8077	PF00840.15	Glyco_hydro_7	3e-152	501.7	5
Corinectria fuckeliana CBS 125109	Prot_9459	PF02324.11	Glyco_hydro_70	0.0053	9.3	0
Corinectria fuckeliana CBS 125109	Prot_9729	PF03198.9	Glyco_hydro_72	4.9e-127	418	7.2
Corinectria fuckeliana CBS 125109	Prot_10297	PF07335.6	Glyco_hydro_75	6.2e-48	157.4	0.4
Corinectria fuckeliana CBS 125109	Prot_6033	PF03663.9	Glyco_hydro_76	1e-145	480.5	5.6
Corinectria fuckeliana CBS 125109	Prot_5341	PF07470.8	Glyco_hydro_88	3.7e-63	208.4	9.1
Corinectria fuckeliana CBS 125109	Prot_8290	PF07470.8	Glyco_hydro_88	4.2e-16	53.7	1
Corinectria fuckeliana CBS 125109	Prot_27	PF11790.3	Glyco_hydro_cc	0.0003	15.1	0.1
Corinectria fuckeliana CBS 125109	Prot_10268	PF14498.1	Glyco_hyd_65N_2	0.00082	13.9	0
Corinectria fuckeliana CBS 125109	Prot_2284	PF04724.8	Glyco_transf_17	6.9e-46	151.6	0
Corinectria fuckeliana CBS 125109	Prot_7605	PF05637.7	Glyco_transf_34	1e-15	52.7	0.1
Corinectria fuckeliana CBS 125109	Prot_10153	PF01501.15	Glyco_transf_8	0.00034	14.8	1.8
Corinectria fuckeliana CBS 125109	Prot_1818	PF01501.15	Glyco_transf_8	0.00048	14.3	0.1
Corinectria fuckeliana CBS 125109	Prot_3009	PF13524.1	Glyco_transf_1_2	0.00076	14.6	0
Corinectria fuckeliana CBS 125109	Prot_3009	PF13692.1	Glyco_transf_1_4	2.1e-21	71.3	0
Corinectria fuckeliana CBS 125109	Prot_5800	PF03808.8	Glyco_tran_WecB	0.023	8.9	0
Corinectria fuckeliana CBS 125109	Prot_5486	PF00903.20	Glyoxalase	3.1e-05	18.8	0
Corinectria fuckeliana CBS 125109	Prot_5486	PF12681.2	Glyoxalase_2	1.7e-09	33.1	0
Corinectria fuckeliana CBS 125109	Prot_5486	PF13468.1	Glyoxalase_3	0.0084	10.8	0
Corinectria fuckeliana CBS 125109	Prot_5486	PF13669.1	Glyoxalase_4	5.1e-05	18.1	0
Corinectria fuckeliana CBS 125109	Prot_10342	PF05199.8	GMC_oxred_C	1.4e-42	140.2	0
Corinectria fuckeliana CBS 125109	Prot_5394	PF05199.8	GMC_oxred_C	1.1e-33	111.4	0
Corinectria fuckeliana CBS 125109	Prot_8429	PF05199.8	GMC_oxred_C	2.1e-24	81.3	0.5
Corinectria fuckeliana CBS 125109	Prot_6300	PF05199.8	GMC_oxred_C	2e-21	71.6	0
Corinectria fuckeliana CBS 125109	Prot_5394	PF00732.14	GMC_oxred_N	2.5e-61	202.2	0
Corinectria fuckeliana CBS 125109	Prot_10342	PF00732.14	GMC_oxred_N	1.6e-55	183.2	0.2
Corinectria fuckeliana CBS 125109	Prot_8429	PF00732.14	GMC_oxred_N	4.1e-27	89.9	0.2
Corinectria fuckeliana CBS 125109	Prot_6300	PF00732.14	GMC_oxred_N	4.1e-26	86.6	0
Corinectria fuckeliana CBS 125109	Prot_10571	PF00732.14	GMC_oxred_N	0.00012	16.1	0
Corinectria fuckeliana CBS 125109	Prot_9314	PF09787.4	Golgin_A5	5.4	0.1	16.9
Corinectria fuckeliana CBS 125109	Prot_2709	PF09787.4	Golgin_A5	10	-0.8	15.4
Corinectria fuckeliana CBS 125109	Prot_2718	PF10342.4	GPI-anchored	7.4e-21	69.3	0.3
Corinectria fuckeliana CBS 125109	Prot_11294	PF10342.4	GPI-anchored	5.5e-17	56.9	0.4
Corinectria fuckeliana CBS 125109	Prot_726	PF11359.3	gpUL132	0.0011	13.1	0
Corinectria fuckeliana CBS 125109	Prot_2432	PF00746.16	Gram_pos_anchor	0.048	8.4	2.7
Corinectria fuckeliana CBS 125109	Prot_6718	PF00396.13	Granulin	0.019	9.9	4.1
Corinectria fuckeliana CBS 125109	Prot_699	PF00396.13	Granulin	0.015	10.3	5.1
Corinectria fuckeliana CBS 125109	Prot_1688	PF00396.13	Granulin	0.65	5	5.5
Corinectria fuckeliana CBS 125109	Prot_4743	PF07995.6	GSDH	8.9e-07	23	0.3
Corinectria fuckeliana CBS 125109	Prot_5449	PF02955.11	GSH-S_ATP	0.003	11.5	0
Corinectria fuckeliana CBS 125109	Prot_9759	PF01019.16	G_glu_transpept	2e-160	529.4	0.3
Corinectria fuckeliana CBS 125109	Prot_5367	PF04388.7	Hamartin	0.17	5.2	7.2
Corinectria fuckeliana CBS 125109	Prot_62	PF04388.7	Hamartin	0.63	3.4	14.7
Corinectria fuckeliana CBS 125109	Prot_9627	PF00672.20	HAMP	0.002	13.1	0.3
Corinectria fuckeliana CBS 125109	Prot_10657	PF14856.1	Hce2	1.1e-12	42.6	0
Corinectria fuckeliana CBS 125109	Prot_9459	PF14701.1	hDGE_amylase	0.0014	12.3	0.1
Corinectria fuckeliana CBS 125109	Prot_5613	PF12661.2	hEGF	0.096	7.8	2.7
Corinectria fuckeliana CBS 125109	Prot_8373	PF01814.18	Hemerythrin	3.1e-11	38.4	0.1
Corinectria fuckeliana CBS 125109	Prot_7831	PF05109.8	Herpes_BLLF1	0.22	4.2	32.1
Corinectria fuckeliana CBS 125109	Prot_11294	PF05109.8	Herpes_BLLF1	1.7	1.2	39
Corinectria fuckeliana CBS 125109	Prot_4341	PF06112.6	Herpes_capsid	0.89	4.4	13.7
Corinectria fuckeliana CBS 125109	Prot_2432	PF02480.11	Herpes_gE	0.0011	12	0
Corinectria fuckeliana CBS 125109	Prot_9572	PF03326.8	Herpes_TAF50	0.0054	10.5	6.8
Corinectria fuckeliana CBS 125109	Prot_7991	PF03326.8	Herpes_TAF50	0.19	5.4	16.8
Corinectria fuckeliana CBS 125109	Prot_11294	PF03326.8	Herpes_TAF50	0.18	5.4	17.2
Corinectria fuckeliana CBS 125109	Prot_5488	PF06985.6	HET	0.00063	14.7	0
Corinectria fuckeliana CBS 125109	Prot_10264	PF07217.6	Het-C	2.6e-285	942.1	0
Corinectria fuckeliana CBS 125109	Prot_6300	PF03486.9	HI0933_like	4.1e-08	26.9	0.5
Corinectria fuckeliana CBS 125109	Prot_5204	PF03486.9	HI0933_like	6.2e-08	26.2	2.4
Corinectria fuckeliana CBS 125109	Prot_10571	PF03486.9	HI0933_like	7.8e-07	22.6	0
Corinectria fuckeliana CBS 125109	Prot_8429	PF03486.9	HI0933_like	8.9e-06	19.2	0.2
Corinectria fuckeliana CBS 125109	Prot_7736	PF03486.9	HI0933_like	7.7e-05	16.1	0.3
Corinectria fuckeliana CBS 125109	Prot_5394	PF03486.9	HI0933_like	0.046	6.9	2.2
Corinectria fuckeliana CBS 125109	Prot_7991	PF12722.2	Hid1	0.0053	9.2	6.8
Corinectria fuckeliana CBS 125109	Prot_8754	PF12722.2	Hid1	0.87	1.9	9.7
Corinectria fuckeliana CBS 125109	Prot_2036	PF12722.2	Hid1	4.6	-0.5	18
Corinectria fuckeliana CBS 125109	Prot_1886	PF00977.16	His_biosynth	0.0011	13	0.2
Corinectria fuckeliana CBS 125109	Prot_10283	PF00977.16	His_biosynth	0.015	9.3	0.1
Corinectria fuckeliana CBS 125109	Prot_6664	PF00300.17	His_Phos_1	1.7e-14	49	0
Corinectria fuckeliana CBS 125109	Prot_4265	PF00328.17	His_Phos_2	8.4e-10	33.2	0.1
Corinectria fuckeliana CBS 125109	Prot_6798	PF00328.17	His_Phos_2	3.5e-07	24.6	0
Corinectria fuckeliana CBS 125109	Prot_6664	PF00328.17	His_Phos_2	0.007	10.5	0
Corinectria fuckeliana CBS 125109	Prot_9353	PF00742.14	Homoserine_dh	0.0015	13.1	2.6
Corinectria fuckeliana CBS 125109	Prot_6692	PF12284.3	HoxA13_N	0.026	9.5	4.2
Corinectria fuckeliana CBS 125109	Prot_5401	PF13933.1	HRXXH	9.6e-10	33	0.1
Corinectria fuckeliana CBS 125109	Prot_2125	PF00012.15	HSP70	5.6e-267	881.3	15
Corinectria fuckeliana CBS 125109	Prot_1997	PF13560.1	HTH_31	0.004	12.2	0
Corinectria fuckeliana CBS 125109	Prot_2125	PF01968.13	Hydantoinase_A	0.0006	13.7	0.1
Corinectria fuckeliana CBS 125109	Prot_1416	PF12146.3	Hydrolase_4	1.5e-05	19.6	0
Corinectria fuckeliana CBS 125109	Prot_8987	PF12146.3	Hydrolase_4	9.3e-05	17.1	0.1
Corinectria fuckeliana CBS 125109	Prot_3166	PF06766.6	Hydrophobin_2	7.3e-28	90.9	8
Corinectria fuckeliana CBS 125109	Prot_5542	PF06462.7	HyD_WA	0.9	4.1	0.1
Corinectria fuckeliana CBS 125109	Prot_8418	PF11765.3	Hyphal_reg_CWP	0.00087	12.9	0.2
Corinectria fuckeliana CBS 125109	Prot_10006	PF01378.12	IgG_binding_B	0.51	5	0
Corinectria fuckeliana CBS 125109	Prot_5204	PF07991.7	IlvN	0.00032	14.9	0.2
Corinectria fuckeliana CBS 125109	Prot_1886	PF00478.20	IMPDH	7.4e-08	26.4	0.4
Corinectria fuckeliana CBS 125109	Prot_10283	PF00478.20	IMPDH	0.0002	15.1	0
Corinectria fuckeliana CBS 125109	Prot_3754	PF05922.11	Inhibitor_I9	5.2e-18	60.3	0.1
Corinectria fuckeliana CBS 125109	Prot_8541	PF05922.11	Inhibitor_I9	1.3e-17	59	0.1
Corinectria fuckeliana CBS 125109	Prot_7129	PF05922.11	Inhibitor_I9	4.2e-12	41.4	0
Corinectria fuckeliana CBS 125109	Prot_10597	PF05922.11	Inhibitor_I9	2.9e-08	29	1
Corinectria fuckeliana CBS 125109	Prot_5020	PF05922.11	Inhibitor_I9	3.4e-05	19.2	0.1
Corinectria fuckeliana CBS 125109	Prot_9314	PF15369.1	KIAA1328	0.089	7.3	5.7
Corinectria fuckeliana CBS 125109	Prot_2714	PF08659.5	KR	7.1e-12	40.1	1.5
Corinectria fuckeliana CBS 125109	Prot_10571	PF13434.1	K_oxygenase	0.043	7.5	0
Corinectria fuckeliana CBS 125109	Prot_5204	PF13434.1	K_oxygenase	0.21	5.2	0
Corinectria fuckeliana CBS 125109	Prot_6047	PF00753.22	Lactamase_B	3.1e-23	77.2	0.5
Corinectria fuckeliana CBS 125109	Prot_6047	PF12706.2	Lactamase_B_2	5.7e-08	27.3	0
Corinectria fuckeliana CBS 125109	Prot_6047	PF13483.1	Lactamase_B_3	2.8e-05	18.7	0
Corinectria fuckeliana CBS 125109	Prot_6840	PF10282.4	Lactonase	4.3e-19	63.5	1
Corinectria fuckeliana CBS 125109	Prot_1918	PF10282.4	Lactonase	0.00044	14.2	0
Corinectria fuckeliana CBS 125109	Prot_4874	PF03388.8	Lectin_leg-like	1e-62	206	0
Corinectria fuckeliana CBS 125109	Prot_4874	PF00139.14	Lectin_legB	0.0036	11.5	0
Corinectria fuckeliana CBS 125109	Prot_9597	PF02900.13	LigB	1.5e-47	156.6	0.8
Corinectria fuckeliana CBS 125109	Prot_9314	PF03353.10	Lin-8	0.076	7	7.4
Corinectria fuckeliana CBS 125109	Prot_6289	PF03583.9	LIP	3.3e-73	241.2	1.3
Corinectria fuckeliana CBS 125109	Prot_5275	PF03583.9	LIP	5.7e-72	237.1	0
Corinectria fuckeliana CBS 125109	Prot_6148	PF03583.9	LIP	0.011	9.7	2
Corinectria fuckeliana CBS 125109	Prot_2843	PF01764.20	Lipase_3	5.5e-39	127.8	0
Corinectria fuckeliana CBS 125109	Prot_4279	PF01764.20	Lipase_3	5.4e-05	17.7	0
Corinectria fuckeliana CBS 125109	Prot_1557	PF01764.20	Lipase_3	0.00011	16.7	0.1
Corinectria fuckeliana CBS 125109	Prot_6025	PF01764.20	Lipase_3	0.00068	14.1	0
Corinectria fuckeliana CBS 125109	Prot_8206	PF00657.17	Lipase_GDSL	2.6e-14	48.4	0.1
Corinectria fuckeliana CBS 125109	Prot_10455	PF00657.17	Lipase_GDSL	6e-13	43.9	0.4
Corinectria fuckeliana CBS 125109	Prot_5980	PF00657.17	Lipase_GDSL	8.8e-13	43.4	0.9
Corinectria fuckeliana CBS 125109	Prot_6317	PF00657.17	Lipase_GDSL	3.1e-06	22	0.2
Corinectria fuckeliana CBS 125109	Prot_6317	PF13472.1	Lipase_GDSL_2	7.1e-17	56.9	0.3
Corinectria fuckeliana CBS 125109	Prot_5980	PF13472.1	Lipase_GDSL_2	4e-13	44.7	2.3
Corinectria fuckeliana CBS 125109	Prot_11281	PF14067.1	LssY_C	0.097	6.4	0
Corinectria fuckeliana CBS 125109	Prot_699	PF14625.1	Lustrin_cystein	0.0013	13.7	8.9
Corinectria fuckeliana CBS 125109	Prot_10342	PF05834.7	Lycopene_cycl	1.7e-06	22	0
Corinectria fuckeliana CBS 125109	Prot_6300	PF05834.7	Lycopene_cycl	5.6e-06	20.3	0.2
Corinectria fuckeliana CBS 125109	Prot_8429	PF05834.7	Lycopene_cycl	0.00011	16	0.1
Corinectria fuckeliana CBS 125109	Prot_7736	PF05834.7	Lycopene_cycl	0.00023	14.9	0.2
Corinectria fuckeliana CBS 125109	Prot_10571	PF05834.7	Lycopene_cycl	0.00027	14.7	0
Corinectria fuckeliana CBS 125109	Prot_5204	PF05834.7	Lycopene_cycl	0.00056	13.7	0.1
Corinectria fuckeliana CBS 125109	Prot_5394	PF05834.7	Lycopene_cycl	0.0051	10.5	1.9
Corinectria fuckeliana CBS 125109	Prot_11220	PF01476.15	LysM	0.0001	17	0
Corinectria fuckeliana CBS 125109	Prot_2341	PF01476.15	LysM	4.1e-05	18.3	0
Corinectria fuckeliana CBS 125109	Prot_3839	PF09726.4	Macoilin	0.078	6	5.7
Corinectria fuckeliana CBS 125109	Prot_11294	PF09726.4	Macoilin	0.18	4.8	10.6
Corinectria fuckeliana CBS 125109	Prot_62	PF09726.4	Macoilin	0.29	4.1	13
Corinectria fuckeliana CBS 125109	Prot_7991	PF09726.4	Macoilin	0.3	4	25.6
Corinectria fuckeliana CBS 125109	Prot_323	PF09726.4	Macoilin	0.29	4.1	9.8
Corinectria fuckeliana CBS 125109	Prot_836	PF09726.4	Macoilin	0.42	3.6	18.9
Corinectria fuckeliana CBS 125109	Prot_9314	PF09726.4	Macoilin	0.59	3.1	12.6
Corinectria fuckeliana CBS 125109	Prot_8754	PF09726.4	Macoilin	0.66	2.9	10.9
Corinectria fuckeliana CBS 125109	Prot_2036	PF09726.4	Macoilin	1.2	2	22.5
Corinectria fuckeliana CBS 125109	Prot_2709	PF09726.4	Macoilin	1.3	1.9	17.7
Corinectria fuckeliana CBS 125109	Prot_5423	PF09726.4	Macoilin	2.6	0.9	15.2
Corinectria fuckeliana CBS 125109	Prot_2668	PF09726.4	Macoilin	7.8	-0.6	17.2
Corinectria fuckeliana CBS 125109	Prot_10153	PF11051.3	Mannosyl_trans3	0.00064	13.9	0
Corinectria fuckeliana CBS 125109	Prot_1818	PF11051.3	Mannosyl_trans3	0.0017	12.5	0
Corinectria fuckeliana CBS 125109	Prot_9314	PF03999.7	MAP65_ASE1	4.3	0.5	14.7
Corinectria fuckeliana CBS 125109	Prot_8456	PF02315.11	MDH	0.0068	11.2	0
Corinectria fuckeliana CBS 125109	Prot_2709	PF06333.7	Med13_C	0.0045	10.3	5.7
Corinectria fuckeliana CBS 125109	Prot_6149	PF11593.3	Med3	0.0081	10.2	10.4
Corinectria fuckeliana CBS 125109	Prot_9762	PF11593.3	Med3	0.16	5.9	18.6
Corinectria fuckeliana CBS 125109	Prot_8440	PF11593.3	Med3	2.6	1.9	22.2
Corinectria fuckeliana CBS 125109	Prot_5367	PF11593.3	Med3	4.4	1.2	21
Corinectria fuckeliana CBS 125109	Prot_11294	PF11593.3	Med3	8.3	0.3	31.7
Corinectria fuckeliana CBS 125109	Prot_2251	PF03547.13	Mem_trans	0.098	5.7	0
Corinectria fuckeliana CBS 125109	Prot_2182	PF13578.1	Methyltransf_24	0.00018	17.2	0.1
Corinectria fuckeliana CBS 125109	Prot_3436	PF04478.7	Mid2	1.7e-07	25.6	2.2
Corinectria fuckeliana CBS 125109	Prot_2432	PF04478.7	Mid2	0.00028	15.1	0.2
Corinectria fuckeliana CBS 125109	Prot_2668	PF05644.6	Miff	14	0	12.3
Corinectria fuckeliana CBS 125109	Prot_2036	PF09731.4	Mitofilin	1	2.7	22.2
Corinectria fuckeliana CBS 125109	Prot_91	PF05237.8	ThiF	0.19	6.2	0.1
Corinectria fuckeliana CBS 125109	Prot_1877	PF03473.12	MOSC	1.4e-14	48.5	0
Corinectria fuckeliana CBS 125109	Prot_1877	PF03476.11	MOSC_N	5.2e-13	43.6	0
Corinectria fuckeliana CBS 125109	Prot_2125	PF06723.8	MreB_MbI	1.7e-17	57.8	1.6
Corinectria fuckeliana CBS 125109	Prot_6692	PF12824.2	MRP-L20	0.014	10.2	1.6
Corinectria fuckeliana CBS 125109	Prot_9353	PF12238.3	MSA-2c	0.88	4	8.3
Corinectria fuckeliana CBS 125109	Prot_3191	PF07462.6	MSP1_C	0.11	5.5	5.6
Corinectria fuckeliana CBS 125109	Prot_7724	PF15474.1	MU117	3.5e-24	80	12.2
Corinectria fuckeliana CBS 125109	Prot_11281	PF15474.1	MU117	5e-14	47.4	0.7
Corinectria fuckeliana CBS 125109	Prot_10597	PF05190.13	MutS_IV	0.0054	11.8	0.1
Corinectria fuckeliana CBS 125109	Prot_9934	PF12776.2	Myb_DNA-bind_3	2.2e-05	19.9	0
Corinectria fuckeliana CBS 125109	Prot_9186	PF00175.16	NAD_binding_1	2.9e-19	64.5	0
Corinectria fuckeliana CBS 125109	Prot_2714	PF13460.1	NAD_binding_10	6.2e-07	24.4	0
Corinectria fuckeliana CBS 125109	Prot_5204	PF13241.1	NAD_binding_7	0.00033	15.7	0.1
Corinectria fuckeliana CBS 125109	Prot_450	PF13450.1	NAD_binding_8	4.7e-14	47	0
Corinectria fuckeliana CBS 125109	Prot_10571	PF13450.1	NAD_binding_8	2.4e-14	48	0.5
Corinectria fuckeliana CBS 125109	Prot_5204	PF13450.1	NAD_binding_8	1.2e-12	42.6	0
Corinectria fuckeliana CBS 125109	Prot_7736	PF13450.1	NAD_binding_8	1.4e-07	26.3	0.3
Corinectria fuckeliana CBS 125109	Prot_4745	PF13450.1	NAD_binding_8	2.1e-06	22.5	0
Corinectria fuckeliana CBS 125109	Prot_6300	PF13450.1	NAD_binding_8	2e-06	22.6	0.3
Corinectria fuckeliana CBS 125109	Prot_8429	PF13450.1	NAD_binding_8	6.9e-05	17.7	0.8
Corinectria fuckeliana CBS 125109	Prot_10342	PF13450.1	NAD_binding_8	0.00066	14.5	0.6
Corinectria fuckeliana CBS 125109	Prot_5394	PF13450.1	NAD_binding_8	0.00075	14.4	2
Corinectria fuckeliana CBS 125109	Prot_450	PF13454.1	NAD_binding_9	2.4e-06	22.2	0
Corinectria fuckeliana CBS 125109	Prot_7736	PF13454.1	NAD_binding_9	5e-06	21.2	0
Corinectria fuckeliana CBS 125109	Prot_10571	PF13454.1	NAD_binding_9	0.017	9.7	0
Corinectria fuckeliana CBS 125109	Prot_6300	PF13454.1	NAD_binding_9	0.008	10.8	0.4
Corinectria fuckeliana CBS 125109	Prot_5545	PF07555.8	NAGidase	2.6e-101	333.3	0.1
Corinectria fuckeliana CBS 125109	Prot_2432	PF02690.10	Na_Pi_cotrans	0.00082	13.9	0.2
Corinectria fuckeliana CBS 125109	Prot_5423	PF06512.8	Na_trans_assoc	0.66	4.7	8.6
Corinectria fuckeliana CBS 125109	Prot_1416	PF03096.9	Ndr	3.2e-06	20.6	0
Corinectria fuckeliana CBS 125109	Prot_4743	PF01436.16	NHL	0.51	5.3	0
Corinectria fuckeliana CBS 125109	Prot_9913	PF05450.10	Nicastrin	0.0054	10.8	0
Corinectria fuckeliana CBS 125109	Prot_1886	PF03060.10	NMO	4.5e-06	20.8	1
Corinectria fuckeliana CBS 125109	Prot_7724	PF04147.7	Nop14	0.017	7.8	2.6
Corinectria fuckeliana CBS 125109	Prot_8973	PF04147.7	Nop14	0.083	5.5	8
Corinectria fuckeliana CBS 125109	Prot_2709	PF04147.7	Nop14	2.7	0.5	11
Corinectria fuckeliana CBS 125109	Prot_4581	PF04147.7	Nop14	7.7	-1	19.4
Corinectria fuckeliana CBS 125109	Prot_8435	PF05048.8	NosD	1e-06	22.8	5.7
Corinectria fuckeliana CBS 125109	Prot_1711	PF05048.8	NosD	0.00028	14.9	3.5
Corinectria fuckeliana CBS 125109	Prot_6509	PF10633.4	NPCBM_assoc	0.011	10.7	0.2
Corinectria fuckeliana CBS 125109	Prot_7208	PF05630.6	NPP1	3.7e-62	204.5	0
Corinectria fuckeliana CBS 125109	Prot_1575	PF05630.6	NPP1	1.8e-34	114.1	0
Corinectria fuckeliana CBS 125109	Prot_2333	PF05630.6	NPP1	2.9e-32	106.9	0
Corinectria fuckeliana CBS 125109	Prot_2709	PF03666.8	NPR3	0.022	8	3
Corinectria fuckeliana CBS 125109	Prot_8654	PF06516.6	NUP	2.1e-121	399.4	0
Corinectria fuckeliana CBS 125109	Prot_163	PF00067.17	p450	1.4e-88	292.2	0
Corinectria fuckeliana CBS 125109	Prot_7818	PF00067.17	p450	2.4e-26	87	0
Corinectria fuckeliana CBS 125109	Prot_5449	PF02225.17	PA	7.1e-18	59	0.3
Corinectria fuckeliana CBS 125109	Prot_8185	PF02225.17	PA	7.8e-11	36.4	0
Corinectria fuckeliana CBS 125109	Prot_6509	PF02225.17	PA	0.0067	11	0
Corinectria fuckeliana CBS 125109	Prot_6149	PF07691.7	PA14	1.9e-09	32.2	0.1
Corinectria fuckeliana CBS 125109	Prot_6149	PF10528.4	GLEYA	9e-13	43	0.1
Corinectria fuckeliana CBS 125109	Prot_6025	PF03403.8	PAF-AH_p_II	2.6e-11	37.2	0
Corinectria fuckeliana CBS 125109	Prot_1557	PF03403.8	PAF-AH_p_II	9.6e-09	28.7	0
Corinectria fuckeliana CBS 125109	Prot_2839	PF00024.21	PAN_1	7.9e-06	20.4	5.4
Corinectria fuckeliana CBS 125109	Prot_5025	PF08276.6	PAN_2	0.0024	12.5	1.5
Corinectria fuckeliana CBS 125109	Prot_2839	PF08276.6	PAN_2	0.0026	12.5	4.4
Corinectria fuckeliana CBS 125109	Prot_5025	PF14295.1	PAN_4	0.00014	16.4	1.9
Corinectria fuckeliana CBS 125109	Prot_6303	PF14295.1	PAN_4	0.41	5.3	0.3
Corinectria fuckeliana CBS 125109	Prot_2839	PF14295.1	PAN_4	0.00092	13.8	7
Corinectria fuckeliana CBS 125109	Prot_7991	PF08601.5	PAP1	0.0015	13	17.9
Corinectria fuckeliana CBS 125109	Prot_2251	PF02711.9	Pap_E4	1.5	4.5	13.4
Corinectria fuckeliana CBS 125109	Prot_10438	PF09770.4	PAT1	0.52	3.2	9.9
Corinectria fuckeliana CBS 125109	Prot_6295	PF01161.15	PBP	2.1e-31	103.5	0.5
Corinectria fuckeliana CBS 125109	Prot_1886	PF01884.12	PcrB	0.03	8.3	0.2
Corinectria fuckeliana CBS 125109	Prot_8358	PF08237.6	PE-PPE	9.3e-06	20	0
Corinectria fuckeliana CBS 125109	Prot_4279	PF08237.6	PE-PPE	1.1e-05	19.8	0.1
Corinectria fuckeliana CBS 125109	Prot_216	PF03211.8	Pectate_lyase	4.9e-77	252.9	4.4
Corinectria fuckeliana CBS 125109	Prot_10540	PF03211.8	Pectate_lyase	7.2e-77	252.4	5.5
Corinectria fuckeliana CBS 125109	Prot_3212	PF12708.2	Pectate_lyase_3	3e-08	28.8	7
Corinectria fuckeliana CBS 125109	Prot_7114	PF01095.14	Pectinesterase	1.4e-45	150	5.7
Corinectria fuckeliana CBS 125109	Prot_156	PF01095.14	Pectinesterase	1.9e-55	182.3	0.6
Corinectria fuckeliana CBS 125109	Prot_6969	PF00544.14	Pec_lyase_C	7.5e-22	72.6	9
Corinectria fuckeliana CBS 125109	Prot_7379	PF00544.14	Pec_lyase_C	4.5e-21	70	5.3
Corinectria fuckeliana CBS 125109	Prot_6885	PF00413.19	Peptidase_M10	2.7e-05	18.7	0
Corinectria fuckeliana CBS 125109	Prot_10831	PF00413.19	Peptidase_M10	0.00017	16.2	2.3
Corinectria fuckeliana CBS 125109	Prot_2182	PF00246.19	Peptidase_M14	2.4e-70	232.1	0
Corinectria fuckeliana CBS 125109	Prot_5836	PF00246.19	Peptidase_M14	3.6e-67	221.7	0
Corinectria fuckeliana CBS 125109	Prot_7579	PF00246.19	Peptidase_M14	5.2e-45	149	0.3
Corinectria fuckeliana CBS 125109	Prot_2014	PF00246.19	Peptidase_M14	2.2e-20	68.2	0
Corinectria fuckeliana CBS 125109	Prot_4747	PF05193.16	Peptidase_M16_C	0.18	6.2	0
Corinectria fuckeliana CBS 125109	Prot_10283	PF01244.16	Peptidase_M19	0.00091	13	0
Corinectria fuckeliana CBS 125109	Prot_1886	PF01244.16	Peptidase_M19	0.0062	10.3	0
Corinectria fuckeliana CBS 125109	Prot_9913	PF01546.23	Peptidase_M20	1.6e-08	29.1	0
Corinectria fuckeliana CBS 125109	Prot_5449	PF01546.23	Peptidase_M20	6.1e-07	23.9	0.2
Corinectria fuckeliana CBS 125109	Prot_7980	PF01546.23	Peptidase_M20	8.6e-07	23.4	0
Corinectria fuckeliana CBS 125109	Prot_9913	PF04389.12	Peptidase_M28	1.8e-37	123.6	0.1
Corinectria fuckeliana CBS 125109	Prot_5449	PF04389.12	Peptidase_M28	4.2e-33	109.4	0.1
Corinectria fuckeliana CBS 125109	Prot_7980	PF04389.12	Peptidase_M28	8.8e-27	88.8	0.1
Corinectria fuckeliana CBS 125109	Prot_5219	PF02102.10	Peptidase_M35	1.6e-89	294.8	12.1
Corinectria fuckeliana CBS 125109	Prot_2136	PF02102.10	Peptidase_M35	5.5e-79	260.2	11.2
Corinectria fuckeliana CBS 125109	Prot_6885	PF05572.8	Peptidase_M43	7.1e-21	69.2	0.6
Corinectria fuckeliana CBS 125109	Prot_7585	PF05572.8	Peptidase_M43	0.0019	12.6	0
Corinectria fuckeliana CBS 125109	Prot_6885	PF10462.4	Peptidase_M66	2.8e-06	21.2	0.1
Corinectria fuckeliana CBS 125109	Prot_3856	PF00450.17	Peptidase_S10	5.8e-96	316.9	0.9
Corinectria fuckeliana CBS 125109	Prot_5427	PF00450.17	Peptidase_S10	9.3e-85	280	0.1
Corinectria fuckeliana CBS 125109	Prot_7001	PF00450.17	Peptidase_S10	2.3e-76	252.3	0.1
Corinectria fuckeliana CBS 125109	Prot_10431	PF00450.17	Peptidase_S10	3.1e-59	195.9	0.3
Corinectria fuckeliana CBS 125109	Prot_10037	PF00450.17	Peptidase_S10	6.8e-58	191.5	5.6
Corinectria fuckeliana CBS 125109	Prot_6148	PF02129.13	Peptidase_S15	0.00077	13.7	0.5
Corinectria fuckeliana CBS 125109	Prot_8987	PF02129.13	Peptidase_S15	0.00012	16.4	0.1
Corinectria fuckeliana CBS 125109	Prot_7829	PF05577.7	Peptidase_S28	5.8e-40	131.9	0
Corinectria fuckeliana CBS 125109	Prot_9314	PF08192.6	Peptidase_S64	0.19	4.8	8.6
Corinectria fuckeliana CBS 125109	Prot_2668	PF08192.6	Peptidase_S64	0.7	2.9	13.9
Corinectria fuckeliana CBS 125109	Prot_2036	PF08192.6	Peptidase_S64	6.8	-0.4	21.8
Corinectria fuckeliana CBS 125109	Prot_7991	PF08192.6	Peptidase_S64	10	-0.9	21.6
Corinectria fuckeliana CBS 125109	Prot_6509	PF00082.17	Peptidase_S8	3.3e-52	172.1	0
Corinectria fuckeliana CBS 125109	Prot_7129	PF00082.17	Peptidase_S8	7e-52	171.1	13.8
Corinectria fuckeliana CBS 125109	Prot_8185	PF00082.17	Peptidase_S8	8.4e-48	157.7	0
Corinectria fuckeliana CBS 125109	Prot_10597	PF00082.17	Peptidase_S8	2.8e-46	152.7	17.3
Corinectria fuckeliana CBS 125109	Prot_5020	PF00082.17	Peptidase_S8	5.5e-45	148.4	13.4
Corinectria fuckeliana CBS 125109	Prot_3754	PF00082.17	Peptidase_S8	1.2e-44	147.3	16.4
Corinectria fuckeliana CBS 125109	Prot_8541	PF00082.17	Peptidase_S8	1.6e-43	143.6	19.2
Corinectria fuckeliana CBS 125109	Prot_11188	PF00082.17	Peptidase_S8	8.7e-11	36.2	0.2
Corinectria fuckeliana CBS 125109	Prot_2341	PF00326.16	Peptidase_S9	2.5e-37	122.9	1
Corinectria fuckeliana CBS 125109	Prot_6867	PF00326.16	Peptidase_S9	8.5e-12	39.5	4.5
Corinectria fuckeliana CBS 125109	Prot_6148	PF00326.16	Peptidase_S9	0.0018	12.3	0.2
Corinectria fuckeliana CBS 125109	Prot_7829	PF00326.16	Peptidase_S9	0.0068	10.4	0
Corinectria fuckeliana CBS 125109	Prot_6025	PF00326.16	Peptidase_S9	0.021	8.8	0
Corinectria fuckeliana CBS 125109	Prot_10657	PF12114.3	Period_C	0.018	9.5	2.3
Corinectria fuckeliana CBS 125109	Prot_4341	PF12114.3	Period_C	0.35	5.2	10
Corinectria fuckeliana CBS 125109	Prot_9214	PF00141.18	peroxidase	8.6e-51	167.4	0
Corinectria fuckeliana CBS 125109	Prot_10523	PF00141.18	peroxidase	9.8e-26	85.4	0
Corinectria fuckeliana CBS 125109	Prot_9787	PF01328.12	Peroxidase_2	7.8e-10	32.7	0
Corinectria fuckeliana CBS 125109	Prot_8199	PF04695.8	PEX14_N	0.0067	11.3	2.7
Corinectria fuckeliana CBS 125109	Prot_9314	PF04695.8	PEX14_N	15	0.5	20.5
Corinectria fuckeliana CBS 125109	Prot_9627	PF10333.4	Pga1	0.0054	11.2	0
Corinectria fuckeliana CBS 125109	Prot_1416	PF07819.8	PGAP1	0.00082	13.8	0
Corinectria fuckeliana CBS 125109	Prot_2843	PF07819.8	PGAP1	0.0047	11.3	0
Corinectria fuckeliana CBS 125109	Prot_9597	PF09587.5	PGA_cap	0.0062	10.7	0
Corinectria fuckeliana CBS 125109	Prot_8077	PF05798.6	Phage_FRD3	0.0028	12.8	0
Corinectria fuckeliana CBS 125109	Prot_2374	PF00959.14	Phage_lysozyme	6.5e-16	53.4	0
Corinectria fuckeliana CBS 125109	Prot_8230	PF01663.17	Phosphodiest	5.4e-08	27.3	0.1
Corinectria fuckeliana CBS 125109	Prot_8199	PF00922.12	Phosphoprotein	0.12	6.3	1.4
Corinectria fuckeliana CBS 125109	Prot_5613	PF02333.10	Phytase	5.4e-56	184.7	0
Corinectria fuckeliana CBS 125109	Prot_10251	PF02678.11	Pirin	4.1e-32	105.1	0
Corinectria fuckeliana CBS 125109	Prot_10251	PF05726.8	Pirin_C	1.2e-24	81.3	0
Corinectria fuckeliana CBS 125109	Prot_2679	PF00069.20	Pkinase	0.053	7.4	0
Corinectria fuckeliana CBS 125109	Prot_9672	PF01735.13	PLA2_B	2.7e-186	614.3	0.9
Corinectria fuckeliana CBS 125109	Prot_61	PF01735.13	PLA2_B	5.1e-77	253.8	3.3
Corinectria fuckeliana CBS 125109	Prot_9314	PF05795.6	Plasmodium_Vir	0.16	5.9	12.4
Corinectria fuckeliana CBS 125109	Prot_7991	PF05795.6	Plasmodium_Vir	13	-0.4	16.5
Corinectria fuckeliana CBS 125109	Prot_1272	PF13396.1	PLDc_N	0.0036	11.8	1.6
Corinectria fuckeliana CBS 125109	Prot_2432	PF08114.6	PMP1_2	0.0016	12.8	0.4
Corinectria fuckeliana CBS 125109	Prot_2432	PF05808.6	Podoplanin	7.3e-06	20.4	0.4
Corinectria fuckeliana CBS 125109	Prot_2251	PF05808.6	Podoplanin	4.9e-05	17.8	13.3
Corinectria fuckeliana CBS 125109	Prot_8199	PF05808.6	Podoplanin	0.00027	15.4	1.3
Corinectria fuckeliana CBS 125109	Prot_4174	PF01522.16	Polysacc_deac_1	6.7e-29	94.9	0
Corinectria fuckeliana CBS 125109	Prot_9258	PF14099.1	Polysacc_lyase	2.6e-11	38.4	3.1
Corinectria fuckeliana CBS 125109	Prot_4747	PF01011.16	PQQ	0.06	7.9	0
Corinectria fuckeliana CBS 125109	Prot_4747	PF13360.1	PQQ_2	1.1e-15	52.5	4
Corinectria fuckeliana CBS 125109	Prot_450	PF07156.9	Prenylcys_lyase	2.1e-21	71	0
Corinectria fuckeliana CBS 125109	Prot_3839	PF01080.12	Presenilin	0.11	6	4.2
Corinectria fuckeliana CBS 125109	Prot_9314	PF01080.12	Presenilin	0.94	3	14.7
Corinectria fuckeliana CBS 125109	Prot_11188	PF09286.6	Pro-kuma_activ	1.1e-36	120.8	0.1
Corinectria fuckeliana CBS 125109	Prot_2182	PF02244.11	Propep_M14	8.4e-06	20.2	0
Corinectria fuckeliana CBS 125109	Prot_1806	PF00227.21	Proteasome	0.0036	11.4	0
Corinectria fuckeliana CBS 125109	Prot_3147	PF07583.6	PSCyt2	0.0018	12.6	0
Corinectria fuckeliana CBS 125109	Prot_7070	PF01241.13	PSI_PSAK	0.0067	11.3	0.9
Corinectria fuckeliana CBS 125109	Prot_4193	PF04886.7	PT	1.1e-07	25.9	5.5
Corinectria fuckeliana CBS 125109	Prot_5204	PF00070.22	Pyr_redox	2.2e-06	22.8	0.1
Corinectria fuckeliana CBS 125109	Prot_10571	PF00070.22	Pyr_redox	4.3e-05	18.7	0
Corinectria fuckeliana CBS 125109	Prot_6300	PF00070.22	Pyr_redox	0.0011	14.2	0.8
Corinectria fuckeliana CBS 125109	Prot_7736	PF07992.9	Pyr_redox_2	1.3e-06	23.3	0.1
Corinectria fuckeliana CBS 125109	Prot_6300	PF07992.9	Pyr_redox_2	7.1e-07	24.1	0.5
Corinectria fuckeliana CBS 125109	Prot_5204	PF07992.9	Pyr_redox_2	2e-07	25.9	0.2
Corinectria fuckeliana CBS 125109	Prot_10571	PF07992.9	Pyr_redox_2	9.7e-06	20.4	0.1
Corinectria fuckeliana CBS 125109	Prot_450	PF07992.9	Pyr_redox_2	0.0015	13.2	0.1
Corinectria fuckeliana CBS 125109	Prot_8429	PF07992.9	Pyr_redox_2	0.0024	12.6	0.1
Corinectria fuckeliana CBS 125109	Prot_10342	PF07992.9	Pyr_redox_2	0.0067	11.1	0
Corinectria fuckeliana CBS 125109	Prot_10571	PF13738.1	Pyr_redox_3	8.1e-06	20.8	0
Corinectria fuckeliana CBS 125109	Prot_5204	PF13738.1	Pyr_redox_3	1.2e-07	26.8	0
Corinectria fuckeliana CBS 125109	Prot_7736	PF13738.1	Pyr_redox_3	4.1e-06	21.8	0.2
Corinectria fuckeliana CBS 125109	Prot_8429	PF13738.1	Pyr_redox_3	0.0011	13.9	0
Corinectria fuckeliana CBS 125109	Prot_450	PF13738.1	Pyr_redox_3	5.3e-05	18.1	0
Corinectria fuckeliana CBS 125109	Prot_6300	PF13738.1	Pyr_redox_3	0.00093	14.1	0.1
Corinectria fuckeliana CBS 125109	Prot_10342	PF13738.1	Pyr_redox_3	0.0022	12.9	0.1
Corinectria fuckeliana CBS 125109	Prot_5394	PF13738.1	Pyr_redox_3	0.42	5.4	4
Corinectria fuckeliana CBS 125109	Prot_2125	PF06098.6	Radial_spoke_3	0.0007	13.4	2
Corinectria fuckeliana CBS 125109	Prot_4181	PF07218.6	RAP1	0.78	2.5	9.1
Corinectria fuckeliana CBS 125109	Prot_62	PF07218.6	RAP1	1.2	1.8	20.9
Corinectria fuckeliana CBS 125109	Prot_9314	PF07218.6	RAP1	1.2	1.8	13.9
Corinectria fuckeliana CBS 125109	Prot_3065	PF07218.6	RAP1	2.4	0.9	8.7
Corinectria fuckeliana CBS 125109	Prot_5423	PF07218.6	RAP1	6.3	-0.5	18.3
Corinectria fuckeliana CBS 125109	Prot_8199	PF07218.6	RAP1	8.8	-1	13
Corinectria fuckeliana CBS 125109	Prot_2389	PF12768.2	Rax2	0.0025	11.9	0
Corinectria fuckeliana CBS 125109	Prot_4743	PF13540.1	RCC1_2	0.23	6	0.4
Corinectria fuckeliana CBS 125109	Prot_2389	PF01030.19	Recep_L_domain	0.00021	16.1	0
Corinectria fuckeliana CBS 125109	Prot_2036	PF07964.6	Red1	5.1	-0.2	23.8
Corinectria fuckeliana CBS 125109	Prot_748	PF08534.5	Redoxin	0.0029	12	0
Corinectria fuckeliana CBS 125109	Prot_5095	PF02014.11	Reeler	0.053	8.6	0
Corinectria fuckeliana CBS 125109	Prot_6885	PF13574.1	Reprolysin_2	1.8e-07	26.2	0.2
Corinectria fuckeliana CBS 125109	Prot_6885	PF13582.1	Reprolysin_3	4.3e-07	25.3	0.1
Corinectria fuckeliana CBS 125109	Prot_6885	PF13583.1	Reprolysin_4	0.00038	14.8	1.7
Corinectria fuckeliana CBS 125109	Prot_6885	PF13688.1	Reprolysin_5	6.3e-09	30.8	0.8
Corinectria fuckeliana CBS 125109	Prot_10831	PF13688.1	Reprolysin_5	0.0015	13.3	0
Corinectria fuckeliana CBS 125109	Prot_5542	PF06954.6	Resistin	0.046	8.9	7.4
Corinectria fuckeliana CBS 125109	Prot_7114	PF09570.5	RE_SinI	0.053	7.3	0
Corinectria fuckeliana CBS 125109	Prot_1412	PF09284.5	RhgB_N	2.8e-100	329.6	10.5
Corinectria fuckeliana CBS 125109	Prot_633	PF09284.5	RhgB_N	2.8e-74	244.4	5.5
Corinectria fuckeliana CBS 125109	Prot_7600	PF00445.13	Ribonuclease_T2	1.3e-44	146.9	0.1
Corinectria fuckeliana CBS 125109	Prot_5204	PF00380.14	Ribosomal_S9	0.56	5.3	0.5
Corinectria fuckeliana CBS 125109	Prot_7991	PF02009.11	RIFIN	6.8e-07	24	0.2
Corinectria fuckeliana CBS 125109	Prot_8199	PF02009.11	RIFIN	0.001	13.5	0
Corinectria fuckeliana CBS 125109	Prot_7831	PF02009.11	RIFIN	0.98	3.8	8.8
Corinectria fuckeliana CBS 125109	Prot_11294	PF02009.11	RIFIN	1.9	2.8	13.9
Corinectria fuckeliana CBS 125109	Prot_2714	PF04321.12	RmlD_sub_bind	0.0004	14.1	0
Corinectria fuckeliana CBS 125109	Prot_8541	PF04983.13	RNA_pol_Rpb1_3	0.0066	11	0.5
Corinectria fuckeliana CBS 125109	Prot_2036	PF06459.7	RR_TM4-6	1.6	3.3	15.1
Corinectria fuckeliana CBS 125109	Prot_7070	PF02265.11	S1-P1_nuclease	1.5e-68	225.9	0
Corinectria fuckeliana CBS 125109	Prot_2714	PF03435.13	Sacchrp_dh_NADP	0.013	9.3	0.2
Corinectria fuckeliana CBS 125109	Prot_2709	PF04499.10	SASP	0.36	4.1	6.3
Corinectria fuckeliana CBS 125109	Prot_2036	PF04499.10	SASP	2.9	1.1	13.5
Corinectria fuckeliana CBS 125109	Prot_954	PF08238.7	Sel1	1.4e-07	26.8	0.1
Corinectria fuckeliana CBS 125109	Prot_4341	PF04360.7	Serglycin	0.049	8.2	18.1
Corinectria fuckeliana CBS 125109	Prot_6579	PF08450.7	SGL	1.5e-24	81.5	0.2
Corinectria fuckeliana CBS 125109	Prot_347	PF08450.7	SGL	3.1e-07	24.8	0.2
Corinectria fuckeliana CBS 125109	Prot_4743	PF08450.7	SGL	0.0043	11.2	0.1
Corinectria fuckeliana CBS 125109	Prot_6840	PF08450.7	SGL	0.00012	16.3	0
Corinectria fuckeliana CBS 125109	Prot_450	PF01488.15	Shikimate_DH	0.002	13	0.1
Corinectria fuckeliana CBS 125109	Prot_8973	PF04546.8	Sigma70_ner	0.059	7.8	5.2
Corinectria fuckeliana CBS 125109	Prot_1688	PF08693.5	SKG6	3.8e-07	24.2	0.1
Corinectria fuckeliana CBS 125109	Prot_10556	PF08693.5	SKG6	5.8e-06	20.4	0.1
Corinectria fuckeliana CBS 125109	Prot_2251	PF08693.5	SKG6	1.9e-05	18.7	1.2
Corinectria fuckeliana CBS 125109	Prot_2389	PF08693.5	SKG6	7.1e-05	16.9	2.6
Corinectria fuckeliana CBS 125109	Prot_2432	PF08693.5	SKG6	0.0049	11	4.5
Corinectria fuckeliana CBS 125109	Prot_3436	PF08693.5	SKG6	0.0089	10.2	1
Corinectria fuckeliana CBS 125109	Prot_10660	PF08693.5	SKG6	0.012	9.8	3.2
Corinectria fuckeliana CBS 125109	Prot_11368	PF03935.10	SKN1	9.5e-06	18.8	0.6
Corinectria fuckeliana CBS 125109	Prot_6312	PF03935.10	SKN1	0.0019	11.2	0.1
Corinectria fuckeliana CBS 125109	Prot_7666	PF00080.15	Sod_Cu	1.6e-15	52.3	0
Corinectria fuckeliana CBS 125109	Prot_2036	PF10428.4	SOG2	1.6	2	22.7
Corinectria fuckeliana CBS 125109	Prot_9314	PF10428.4	SOG2	6.6	0	29.1
Corinectria fuckeliana CBS 125109	Prot_9088	PF04573.7	SPC22	3.6e-25	83	0
Corinectria fuckeliana CBS 125109	Prot_3457	PF01564.12	Spermine_synth	0.0032	11.2	0
Corinectria fuckeliana CBS 125109	Prot_1691	PF12138.3	Spherulin4	7.8e-36	118.5	0.2
Corinectria fuckeliana CBS 125109	Prot_8199	PF12685.2	SpoIIIAH	0.79	4	0
Corinectria fuckeliana CBS 125109	Prot_6692	PF05642.6	Sporozoite_P67	0.059	6	1.9
Corinectria fuckeliana CBS 125109	Prot_3785	PF05642.6	Sporozoite_P67	2.8	0.4	23.8
Corinectria fuckeliana CBS 125109	Prot_7750	PF00622.23	SPRY	3.1e-19	64.1	0
Corinectria fuckeliana CBS 125109	Prot_6201	PF10500.4	SR-25	0.46	4.7	16.2
Corinectria fuckeliana CBS 125109	Prot_5780	PF04888.7	SseC	0.00013	16.2	0.7
Corinectria fuckeliana CBS 125109	Prot_7609	PF07935.6	SSV1_ORF_D-335	0.0068	11	0.1
Corinectria fuckeliana CBS 125109	Prot_729	PF12191.3	stn_TNFRSF12A	0.069	8	0
Corinectria fuckeliana CBS 125109	Prot_6579	PF03088.11	Str_synth	2.3e-07	25.6	0
Corinectria fuckeliana CBS 125109	Prot_8230	PF00884.18	Sulfatase	2.4e-08	28.3	0
Corinectria fuckeliana CBS 125109	Prot_709	PF01975.12	SurE	4.7e-43	141.6	0
Corinectria fuckeliana CBS 125109	Prot_2432	PF01034.15	Syndecan	0.0087	10.6	1.7
Corinectria fuckeliana CBS 125109	Prot_8667	PF15290.1	Syntaphilin	4.9	1.3	13.9
Corinectria fuckeliana CBS 125109	Prot_7831	PF03430.8	TATR	1.7	1.9	8.7
Corinectria fuckeliana CBS 125109	Prot_8410	PF14541.1	TAXi_C	5.3e-05	17.6	0.1
Corinectria fuckeliana CBS 125109	Prot_5066	PF14543.1	TAXi_N	2.7e-10	35.2	0.7
Corinectria fuckeliana CBS 125109	Prot_5800	PF14543.1	TAXi_N	2.8e-08	28.7	0.1
Corinectria fuckeliana CBS 125109	Prot_8410	PF14543.1	TAXi_N	2e-07	25.9	0.4
Corinectria fuckeliana CBS 125109	Prot_6877	PF14543.1	TAXi_N	2.1e-06	22.6	0.4
Corinectria fuckeliana CBS 125109	Prot_8199	PF03634.8	TCP	0.027	9.7	0.1
Corinectria fuckeliana CBS 125109	Prot_3436	PF03153.8	TFIIA	0.00031	15.5	14.9
[truncated: 70 more rows]

[truncated: 5 more sheets: CBS 125109 Peptidases, CBS 125109 Effectors, CBS 177.27, CBS 177.27 Peptidases, CBS 177.27 Effectors]
